# Supplementary material for: Global phenotypic profiling identifies a conserved actinobacterial cofactor for a bifunctional PBP-type cell wall synthase
Source: eLife. 2020 Mar 13;9:e54761. doi: 10.7554/eLife.54761 (PMC7205459; doi:10.7554/eLife.54761)
Supplement: Figure 2—source data 1. — The gene fitness for each gene under each growth condition is listed. [file elife-54761-fig2-data1.xlsx]

## Sheet: Sheet 1
Name	11g_A	11g_B	Amp	Amp_H	PenG	Cefs	Cefs_H	Ceph	Mero	Mero_H	Bacit	Vanco	Vanco_H	Cyclo	Fosfo	Lyso	Lyso_H	Nisin	Nisin_H	Emb	BTZ043	BTZ043_H	Novo	Novo_H	Rif	Rif_H	Cam	Cam_H	Erythro	Erythro_H	Strep	Strep_H	Tet	Tet_H	SDS	SDS_H	Heat	MgCl2	NaCl	NaCl_H
cgp_1622	1.04228	1.0466	1.04531	1.05736	1.03815	1.04376	1.0562	1.04026	1.02069	1.03019	0.997366	1.02259	1.0373	1.01738	1.03508	1.05647	1.02475	1.03729	1.02609	1.04667	1.01848	1.02203	1.0025	1.00115	1.02788	1.01178	1.05464	1.03688	1.025	1.04169	1.04425	1.04167	1.04149	1.04546	1.04649	1.04939	1.0592	1.02545	1.02384	1.01715
cgp_1770	1.01298	1.04365	1.04066	1.04588	1.03037	1.03684	1.04052	1.04867	1.04815	1.03701	1.02681	1.04037	1.02941	1.02308	1.03359	1.05349	1.02252	1.01918	1.02601	1.03892	1.01777	1.02263	1.0128	0.997947	1.0268	1.03663	1.04315	1.03156	1.0376	1.022	1.03936	1.04682	1.02754	1.03373	1.04379	1.06371	1.04388	1.02554	1.02758	1.03541
cgp_1302	1.01352	1.03441	1.03568	1.04312	1.02663	1.05411	1.04852	1.03637	1.02005	1.01932	1.00471	1.03134	1.03225	0.999273	1.03509	1.04927	1.03856	1.03199	1.0227	1.02854	1.01132	0.998384	1.00859	1.00891	1.02267	1.02718	1.03325	1.02345	1.02596	1.04115	1.02965	1.04588	1.01455	1.02614	1.03046	1.029	1.04607	1.0113	1.02095	1.015
cgp_1456	1.03009	1.03752	1.04263	1.02596	1.03597	1.02416	1.04817	1.02961	1.03415	1.02019	1.02576	1.03948	1.02543	1.04938	1.0399	1.03148	1.03029	1.01651	1.02907	1.05148	1.01733	1.00778	1.01366	1.01022	1.02502	1.02127	1.02618	1.04407	1.01871	1.03047	1.04252	1.05174	1.02448	1.02401	1.03432	1.04954	1.06675	1.02419	1.02494	1.01753
qor3	1.04585	1.02925	1.03944	1.017	1.02532	1.03681	1.03334	1.01811	1.0293	1.01465	1.01947	1.04116	1.03237	1.00553	1.02751	1.03416	1.01087	1.02609	1.02145	1.04442	1.00683	1.026	1.01418	1.02636	1.02075	1.02419	1.03418	1.02795	1.02829	1.02468	1.03154	1.04697	1.0356	1.0416	1.0485	1.04832	1.0704	1.0193	1.01117	1.01668
pctA	1.01507	1.04042	1.04069	1.01147	1.03723	1.03488	1.05312	1.03643	1.04097	1.01578	1.04687	0.994503	1.0232	1.02655	1.043	1.0584	1.04059	1.02808	1.02338	1.03768	1.02709	1.0339	1.022	1.00318	1.02325	1.04454	1.03762	1.04483	1.04381	1.05545	1.04193	1.03058	1.0285	1.04117	1.0345	1.02887	1.06535	1.02442	1.02056	1.01231
argC	1.04844	1.04359	1.03204	1.0404	1.04465	1.03726	1.04714	1.02447	1.03572	1.00829	1.02918	1.00208	1.04804	1.02011	1.01535	1.0531	1.02846	1.02041	1.0275	1.03033	1.02062	1.02177	1.00278	0.995313	1.01086	1.03355	1.0426	1.01859	1.04693	1.03234	1.03666	1.03696	1.03181	1.02592	1.01152	1.03909	1.04744	1.00925	1.01674	1.02689
dinF	1.03979	1.05452	1.03963	1.03254	1.0247	1.03299	1.05406	1.05842	1.02937	1.02878	1.04131	1.00917	1.04808	1.00506	1.02088	1.02338	1.05111	1.02073	1.04637	1.04514	1.01989	1.01263	1.00799	1.03035	1.03293	1.01907	1.01236	1.0373	1.03915	1.0367	1.04218	1.04526	1.02076	1.03452	1.03778	1.05139	1.07451	1.01536	1.02256	1.01398
iunH2	1.03989	1.03175	1.02662	1.02968	1.03217	1.03051	1.04282	1.0446	1.02014	1.0392	1.03724	1.0525	1.02013	1.02119	1.04064	1.03183	1.02905	1.02395	1.04059	1.05461	1.0315	1.0238	1.00494	1.01645	1.04495	1.03106	1.0148	1.02418	1.00799	1.05319	1.04489	1.03685	1.02623	1.01847	1.02072	1.04734	1.02043	1.0327	1.04513	1.02105
cgp_0555	1.04607	1.03149	1.00114	1.03395	1.03994	1.02991	1.04712	1.03409	1.02078	1.02389	1.03189	1.03079	1.0389	1.01952	1.02272	1.03178	1.02322	1.02934	1.03909	1.05137	1.02965	1.03594	1.03761	1.03673	1.02914	1.01118	1.00521	1.03706	1.01268	1.02545	1.02606	1.03033	1.02505	1.00977	1.01287	1.0442	1.04076	1.04786	1.03177	1.03298
cgp_1526	1.02228	1.02966	1.0298	1.03416	1.05315	1.01671	1.02697	1.02761	1.03195	1.00398	1.0508	1.01089	1.0424	1.01822	1.05846	1.02891	1.03086	1.02467	1.0403	1.0585	1.05323	1.02886	1.02027	1.00668	1.03754	1.02682	1.0242	1.0248	1.04563	1.0341	1.04262	1.03995	1.01249	1.0145	1.00325	1.03397	1.03659	1.02202	1.01783	1.0309
cgp_2183	1.04689	1.02509	1.05983	1.02176	1.02744	1.0188	1.0389	1.04439	1.02442	1.01179	1.04837	1.05038	1.02217	1.02585	1.03521	1.04922	1.01605	1.01936	1.01334	1.05265	1.00687	1.0422	1.0277	1.03237	1.02023	1.05048	1.02836	1.01454	1.02761	1.04419	1.02703	1.02062	1.02963	1.02529	1.0179	1.03307	1.05332	1.01362	1.02552	1.02313
cgp_1245	1.02181	1.03407	1.0468	1.01985	1.03974	1.02678	1.00268	1.04143	1.03306	1.00821	1.03371	1.05017	1.00755	1.01936	1.02162	1.01517	1.01197	1.02236	1.02727	1.05739	1.02692	1.02403	1.02679	1.00926	1.01631	1.03227	1.02446	1.01388	1.00909	1.02952	1.02713	1.02759	1.03242	1.01661	1.03883	1.01588	1.06085	1.02055	1.01696	1.02385
tesB2	1.04965	1.03664	1.04613	1.01963	1.02527	1.05373	1.04252	1.06282	1.01762	1.00589	1.02207	1.04614	1.03506	1.03368	1.04813	1.02531	1.0422	1.05629	1.02212	1.0472	1.0445	1.01048	0.994223	1.0346	1.00346	1.03175	1.04166	1.01274	1.01885	1.03244	1.04695	1.05421	1.03453	1.03715	1.01722	1.01542	1.03063	0.99403	1.02811	1.0247
cgp_1856	1.04157	1.02658	1.03	1.02205	1.01335	1.05364	1.04204	1.04406	1.01709	0.99442	1.03578	1.04513	1.02244	1.00431	1.04513	1.04616	1.01807	1.05231	1.04898	1.02151	1.03305	1.01793	1.02498	1.04651	1.02827	1.04134	1.04784	1.01759	1.02229	1.03304	1.0374	1.04612	1.03954	1.03713	1.02247	1.03406	1.01389	1.01564	1.02926	1.02944
pepE	1.08247	1.03399	1.05167	1.017	1.04077	1.04878	1.03685	1.03594	1.02647	1.00097	1.02091	1.02576	1.04306	1.02584	1.02205	1.05206	0.998818	1.05143	1.06604	1.07036	1.01962	1.03847	0.993647	1.00672	1.02869	1.02117	1.04082	1.02882	1.03762	1.03712	1.02864	1.06391	1.03449	1.03701	1.04483	1.04706	1.02176	1.0151	1.01265	1.01352
cgp_1697	1.03464	1.02729	1.03354	1.04135	1.04005	1.05823	1.03938	1.04107	1.02915	1.01685	0.99602	1.03518	1.03105	0.996683	1.03192	1.04177	1.02685	1.03732	1.03586	1.0613	1.04073	1.02669	1.02727	1.01185	1.03391	1.03734	1.04297	1.04382	1.02558	1.03307	1.05005	1.05054	1.03742	1.03419	1.01998	1.0252	1.05201	1.0186	1.02009	1.03314
cgp_2184	1.02169	1.02075	1.04128	1.03679	1.03723	1.04922	1.04276	1.04576	1.02576	1.02532	1.0172	1.03297	1.0133	1.03319	1.03813	1.05171	1.02194	1.03163	1.01839	1.0559	1.03347	1.03563	1.021	1.01121	1.0391	1.02679	1.02185	1.02959	1.04129	1.02594	1.04373	1.03127	1.03947	1.02446	1.02766	1.03912	1.03392	1.01328	1.00931	1.02223
leuC	1.05142	1.04841	1.04284	1.03297	1.04382	1.03619	1.02316	1.03486	1.03016	1.01864	1.02834	1.04494	1.03254	0.992205	1.04327	1.0445	1.01744	1.01214	1.00509	1.06325	1.03091	1.01747	1.02624	1.02428	1.0406	1.01862	1.02576	1.02491	1.03364	1.04309	1.05461	1.03856	1.04357	1.03126	1.04427	1.05833	1.039	1.03666	1.04157	1.03504
cgp_2311	1.03385	1.02158	1.04043	1.04738	1.04485	1.0692	1.03183	1.05916	1.03047	1.05428	1.00462	1.04331	1.00732	0.998915	1.04788	1.02384	1.01325	1.02059	1.02895	1.02675	1.05812	1.02591	1.00711	1.02836	1.05165	1.02951	1.02562	1.0419	1.02886	1.04961	1.0542	1.0332	1.02829	1.0217	1.05772	1.04287	1.02539	1.01221	1.01971	1.04009
argD	1.02636	0.995507	1.04892	1.02956	1.01792	1.02747	1.03306	1.04153	1.0374	1.02378	1.02042	1.00147	1.04118	0.984972	1.04611	1.03903	1.01084	1.0133	1.02868	1.02962	1.02559	1.01821	1.0117	1.01829	1.02482	1.01989	1.03659	1.02452	1.03684	1.01345	1.0407	1.03671	1.03191	1.03847	1.05651	1.05232	1.03859	1.00944	1.03108	1.02362
thiM	1.05603	1.00312	1.05636	1.04635	1.03528	1.04942	1.05648	1.03258	1.00746	1.02313	1.04802	1.06023	1.0372	0.998594	1.02862	1.05647	1.03927	1.04777	1.02429	1.02376	1.03013	1.0213	0.984632	0.996073	1.02566	1.0351	1.02338	1.03071	1.03855	1.04174	1.04577	1.04983	1.01421	1.02777	1.02455	1.05548	1.0496	1.01976	1.01004	1.02477
cgp_2306	1.04345	1.01976	1.01444	1.02297	1.02885	1.04428	1.03277	1.06548	1.02594	1.03149	1.02656	1.04203	1.03389	0.992641	1.01714	1.04292	1.04707	1.04713	1.04	0.983956	1.02205	1.02401	1.02252	1.02326	1.03999	1.00108	1.02821	1.03644	1.02912	1.04478	1.04024	1.04997	1.01505	1.02102	0.993457	1.04964	1.03855	1.03183	1.00865	1.01511
cgp_3211	1.01739	1.02234	1.06629	1.04546	1.05813	1.04497	1.0324	1.04894	1.04767	1.0435	1.00735	1.02653	1.01689	1.00347	1.01734	1.03244	1.03447	1.04726	1.04694	1.00436	1.02922	1.00575	1.03302	1.03198	1.04005	1.0561	1.02145	1.01819	1.05636	1.03617	1.01353	1.02833	1.03376	1.01307	1.03977	1.02724	1.03813	1.007	1.02604	1.02729
cgp_0858	1.03319	1.00227	1.04506	1.032	1.0327	1.01503	1.02805	1.0341	1.05858	1.06084	1.04661	0.988278	1.03329	1.04481	1.01484	1.05392	1.04452	1.03578	1.03936	1.01099	1.02443	0.988238	1.01257	1.0127	1.02821	1.026	1.01904	1.02252	1.03244	1.01717	1.01977	1.0108	1.0034	1.0327	1.02772	1.02048	1.03203	1.00995	1.02084	1.01844
cgp_2901	1.08705	1.00909	1.04721	1.04577	1.05002	1.04347	1.06552	1.03424	1.03915	1.03748	1.05201	1.00564	1.039	1.05347	1.01718	1.00244	1.03471	1.04727	1.04526	1.04604	1.02584	1.00387	1.02946	1.0207	1.07428	1.03582	1.02095	1.01417	1.05339	1.04635	1.01452	1.04325	1.03436	1.00444	1.00665	1.00411	1.02285	1.01679	1.02337	1.02261
cgp_2574	1.03337	1.03587	1.0641	1.04131	1.03618	1.04281	1.05635	1.06581	1.02989	1.00927	1.02851	0.966705	1.01733	0.970216	1.02914	1.05191	1.0507	1.01073	1.01274	1.03646	1.04859	1.01879	1.02524	1.03269	1.05014	1.04104	1.02058	1.03683	1.03561	1.04834	1.04156	1.02445	1.06712	1.01475	1.02328	1.05201	1.03774	1.04839	1.02544	1.03055
cobS	1.03268	1.01879	1.06717	1.04709	1.05144	1.04868	1.04104	1.01711	1.01341	1.01471	1.03635	1.00565	1.02367	1.03529	1.01246	1.02556	1.03324	1.03514	1.00495	1.05123	1.02027	1.03036	1.02798	0.983175	1.07431	1.02457	1.01938	1.02766	1.05737	1.02657	1.05843	1.00041	1.05937	1.04401	1.01223	1.04417	1.05778	1.02597	1.00951	1.03341
cgp_1591	1.00466	1.05227	1.03973	1.00923	1.04849	1.07286	1.06546	1.04795	1.03531	1.05288	1.00818	0.992138	1.02404	1.02905	1.05202	1.04994	1.05535	1.01686	1.03205	1.02039	1.06162	1.02345	1.02217	1.00621	1.08017	1.02887	1.03341	1.01405	1.02086	1.06158	1.03387	1.03724	1.02798	1.02262	1.00749	1.00559	1.00609	1.0285	1.02102	1.00149
gluC	0.991841	1.02493	1.03253	1.05695	1.01172	1.05192	1.04261	1.0479	1.02834	0.998176	1.0273	1.01209	1.04883	0.985407	1.03319	1.03839	1.03463	1.02245	1.04619	1.0489	1.04915	1.00835	0.992827	0.99688	1.06738	1.05813	1.02562	1.03504	1.0485	1.03497	1.04843	1.04954	1.02577	1.02744	0.97432	1.04838	0.996839	1.0002	1.01411	1.01206
cgp_1347	1.02877	1.03676	1.02564	1.02815	1.03561	1.02775	1.04038	1.03504	1.02118	1.02375	1.01491	1.04187	1.02498	1.01092	1.00853	1.03267	1.00793	1.03184	1.02301	1.04893	1.01999	1.0319	1.01548	1.00378	1.01878	1.03223	1.02149	1.0036	1.02828	1.02396	1.04528	1.02047	1.02244	1.03622	1.02145	1.01128	0.99232	1.01059	1.01234	1.02941
cgp_2342	1.02709	1.03243	1.05163	1.00972	1.01789	1.01659	1.04407	1.03449	1.02901	1.02355	1.01084	1.01744	1.02343	1.01164	1.02545	1.04456	1.02585	1.02235	1.0106	1.02522	1.00834	1.02128	0.975516	1.01132	1.02319	1.02402	1.02897	1.01301	1.02376	1.02187	1.05071	1.0207	1.02785	1.02512	1.02268	1.04146	1.01138	1.01101	1.01008	1.01406
tetB	1.03278	1.0225	1.01306	1.01192	1.02071	1.03185	1.04643	1.02274	1.03712	1.01167	1.01437	1.03719	1.03211	1.00876	1.03962	1.04999	1.0145	1.02322	1.03222	1.05616	1.00413	1.01469	1.00392	1.01211	0.994839	1.02414	1.03814	1.03718	1.02105	1.02592	1.03252	1.03264	1.02504	1.02658	1.00335	1.05252	1.01429	1.01106	1.0149	1.02862
cgp_2190	1.01283	1.02912	1.04182	1.03839	1.03789	1.02914	1.02937	1.01527	1.02944	1.0264	1.0131	1.00361	0.99151	1.01933	1.01351	1.03494	1.01146	1.00917	1.01007	1.03554	1.02969	1.0114	1.01762	0.998352	1.01368	1.01988	1.02054	1.01652	1.02909	1.02264	1.02744	1.00469	1.04209	1.02416	1.01721	1.02331	1.02286	0.992444	1.00305	1.01161
cgp_1088	1.01325	1.01738	1.02161	1.01985	1.02628	1.02249	1.04286	1.02165	1.02569	1.02726	1.01198	1.01631	1.01037	1.04193	1.01441	1.02172	1.0133	1.01556	1.00608	1.02723	1.02378	1.00554	1.02038	0.993468	1.02134	1.01629	1.00742	1.02759	1.01141	1.02459	1.03038	1.03704	1.0212	1.02062	1.01621	1.04476	0.995202	1.0113	0.993627	1.02391
narK	1.00687	1.02193	1.0144	0.998238	1.02147	1.01922	1.02163	1.02633	1.0241	1.03336	1.00814	1.00232	1.02478	1.03146	1.03201	1.02236	1.03168	1.01329	1.03263	1.05898	1.03923	1.01937	1.03114	1.00695	1.01334	1.00044	1.0159	1.01638	1.0357	1.03252	1.02753	1.02787	1.03528	1.04194	1.01838	1.03906	1.007	0.993392	1.00623	1.02367
cgp_1754	1.01056	1.04688	1.03126	1.01337	1.04139	1.03728	1.053	1.04413	1.0319	0.99738	1.02785	1.03113	1.02362	1.00346	1.03035	1.00689	1.04307	1.00926	1.02831	1.064	1.03492	1.01776	1.00823	1.01509	1.04161	1.04272	1.03295	1.01331	1.01291	1.02789	1.04933	1.03442	1.02069	1.0391	1.0396	1.03806	1.04677	1.01609	1.00936	1.0126
cgp_1351	1.03053	1.01189	1.02979	1.03681	1.03775	1.0336	1.03068	1.01503	1.02241	1.0028	1.02065	1.01547	1.02775	1.01763	1.02577	1.01964	1.0473	1.02497	1.0065	1.06136	1.03893	1.0149	1.02374	1.01072	1.02256	1.02365	1.0362	1.01469	0.998538	1.03681	1.02896	1.04662	1.03799	1.03076	1.01485	1.03458	1.0357	1.00722	1.0089	1.01249
cgp_1391	1.03615	1.01494	1.0365	1.02465	1.04198	1.02557	1.06328	1.04593	1.01375	1.00816	0.98831	1.02214	1.02068	1.00529	1.0317	1.0132	1.03818	1.02567	1.0235	1.01669	1.01723	1.01806	1.03332	1.01973	1.02733	1.04991	1.02437	1.02357	0.996081	1.02789	1.02731	1.0493	1.02552	1.04564	1.04773	1.04073	1.00859	1.01817	1.0154	1.00972
pcaR	1.04907	1.0572	1.02623	1.02627	1.02375	1.01573	1.05453	1.00703	1.03055	1.04502	0.989004	1.00311	1.02756	1.01409	1.03982	1.02348	1.03599	1.01981	1.0283	1.0239	1.00626	1.01027	1.017	1.00857	1.06202	1.01912	1.03762	1.0168	1.04933	1.03049	1.0229	1.02019	1.01788	1.01765	1.01804	1.0591	1.00165	1.0288	1.03789	1.01913
rbsC	1.03635	1.01649	1.01326	1.03374	1.03603	1.01214	1.03449	1.00732	1.03148	1.03418	1.02335	0.976775	1.04827	1.01633	1.01569	1.03552	1.03568	1.00202	1.02202	1.04616	0.985405	1.00719	1.00735	1.0013	1.03796	1.03488	1.04062	0.990075	1.00928	1.00877	1.03489	1.0066	1.0034	1.04323	1.02778	1.03439	1.03004	1.02408	1.03497	0.985347
cgp_2182	1.04649	1.01895	1.0297	1.03959	1.0176	1.03066	1.0684	1.06009	1.02259	1.02524	1.02987	1.00896	1.0078	1.04513	1.01623	1.05842	1.04448	1.03193	1.03546	1.03964	1.02422	1.05509	0.971175	0.998645	1.01576	1.01343	1.02557	1.01985	1.02525	1.02248	1.04558	1.05493	1.03137	1.03577	1.00463	1.03622	1.06552	1.01007	1.0006	1.02005
cgp_1646	1.01207	0.993679	1.0436	1.03278	1.01712	1.03212	1.06385	1.04189	1.02939	1.0544	0.991173	1.00875	1.00325	1.01845	1.01218	1.04295	1.04565	1.01381	1.02562	1.02485	1.0457	1.02165	1.0004	0.991425	0.998173	1.03032	1.02655	1.03717	1.02489	1.02781	1.0388	1.03222	1.0364	1.04417	1.01969	1.03832	1.04681	1.00746	1.01245	1.02295
cgp_1638	1.02252	1.01213	1.02632	1.03766	1.02087	1.04467	1.07373	1.04304	1.00619	1.01907	0.996645	1.00748	0.985774	1.00351	1.02059	1.02886	1.01125	1.00499	1.01686	1.02509	1.00365	1.02168	0.999296	0.971061	1.03177	1.04673	1.01551	1.0062	1.0463	1.03371	1.04609	1.02346	1.039	1.01497	1.03757	1.01102	1.06398	0.9653	1.00372	1.00609
uvrC	1.02441	1.00867	1.04006	1.02591	1.01543	1.04752	1.04259	1.01226	1.00619	1.00415	1.01598	1.00544	1.01748	0.991462	1.01929	1.0406	1.01142	1.00445	1.01504	1.02212	1.04871	1.01601	0.957031	0.972376	1.04288	1.01233	1.02273	1.03259	1.02241	1.02596	1.04347	1.01707	1.03126	1.01417	1.01737	1.02475	1.05085	1.01175	0.995749	0.986287
cgp_1686	1.0165	1.04465	1.04311	1.04159	1.03668	1.05273	1.07349	1.04934	1.04332	1.02335	1.05549	1.02711	1.03328	0.992585	1.0319	1.0324	1.04078	1.00876	1.01149	1.02211	0.993853	0.994948	1.01271	0.991423	1.02868	1.01723	1.0333	1.03553	1.03895	1.03185	1.03482	1.0247	1.03073	1.04019	1.04946	1.01335	1.05397	1.03478	1.0149	1.01387
uvrB	1.00866	1.0296	1.03645	1.03926	1.01006	1.05257	1.03549	1.04837	1.00878	1.00761	1.00309	1.01235	1.04186	0.990332	1.032	1.01011	1.02037	1.0252	1.00772	1.05881	0.985559	0.977969	0.999229	0.962034	1.02806	1.01094	1.04564	1.02407	1.02758	1.04039	1.02942	1.03933	1.02602	1.03638	1.05062	1.01646	1.06043	1.02315	1.02397	1.01551
cgp_1612	1.04495	1.05483	1.04095	1.02955	1.02324	1.02089	1.03897	1.05098	1.03402	1.02108	1.04569	1.02683	1.01389	1.03952	1.03633	1.0219	1.03179	1.02979	1.02205	1.02984	0.998833	0.993501	0.986554	0.979457	1.02327	1.03581	1.02181	1.0428	1.03686	1.02144	1.03005	1.07815	1.05219	1.02499	1.04143	1.01505	1.07481	0.967995	1.02899	1.00417
cgp_1504	1.02468	1.02664	1.02272	1.02883	1.03225	1.04011	1.02082	1.04674	1.01422	1.00988	1.01693	0.986611	1.03895	1.04391	1.03293	1.03831	1.03448	1.00296	1.0164	0.986745	0.997069	0.986951	0.988616	0.991239	0.998565	1.00822	1.04267	1.01987	1.03362	1.04804	1.03285	1.05233	1.02438	1.03105	1.02658	1.01474	1.04761	0.993714	1.00132	1.02556
glpD	1.01529	1.01557	1.03756	1.03447	1.03136	1.04257	1.03323	1.03754	1.02786	1.00429	1.00163	1.01346	1.02351	1.0412	1.03483	1.03159	1.02651	1.01443	1.01244	1.03372	1.00854	0.98671	0.994735	1.0103	1.03355	1.02369	1.02897	1.03257	1.03301	1.02413	1.03555	1.0452	1.03005	1.04034	1.03884	1.02132	1.04207	1.01536	1.00542	1.02118
glgP2	1.03402	1.013	1.01842	1.03362	1.02103	1.03323	1.02723	1.02415	1.02582	0.996115	1.0213	1.04366	1.03806	1.03947	1.01123	1.0246	1.01587	1.02245	1.01567	1.03274	1.01251	1.01011	1.00228	1.01162	1.02289	1.02246	1.02533	1.01774	1.03062	1.0198	1.02296	1.03381	1.02336	1.03314	1.01257	1.01151	1.04446	1.00926	1.0116	1.01589
cgp_2279	1.03259	1.01807	1.03759	1.03551	1.0161	1.03609	1.04299	1.03057	1.01231	0.979947	0.992874	1.01655	1.01531	1.03972	1.02476	1.01646	1.04233	1.0104	1.02174	1.04917	1.0154	1.00062	1.01161	1.02384	1.01634	1.04127	1.02815	1.03016	1.01567	1.02579	1.0485	1.04228	1.02501	1.01963	1.01376	1.01871	1.03993	1.01744	1.03098	1.00604
putP	1.01053	1.02302	1.0346	1.03356	1.01908	1.04732	1.04373	1.02932	1.0173	1.00516	1.02456	1.0179	1.01617	1.04606	1.03732	1.00532	1.02874	1.04282	1.02039	1.06079	1.00514	1.00141	0.990774	1.0171	1.03413	1.01387	1.01987	1.0112	1.01917	1.03239	1.01369	1.00263	1.02414	1.03629	1.01469	1.02844	1.01282	1.03077	1.02271	1.00584
cgp_1238	0.995229	1.01326	1.03114	1.04487	1.02532	1.03006	1.04978	1.02856	0.997245	0.991712	1.0471	1.0164	1.01389	1.01372	1.03108	1.03105	1.02331	1.02252	1.02921	1.02678	1.03017	1.02603	1.00934	1.00998	1.03806	1.02814	1.01825	1.02269	1.03994	1.01783	1.01711	1.02041	1.02535	1.01896	1.01249	1.00256	1.0636	1.00692	1.01666	1.00756
cgp_2345	1.01758	1.02236	1.00745	1.02171	1.00739	1.01948	1.04124	1.01913	1.00967	0.977232	1.02447	1.0333	1.00034	1.03983	1.02007	1.03864	1.0182	1.032	1.02322	1.0433	1.01991	1.00481	1.01888	1.01886	1.02875	1.00692	1.02775	1.02153	1.02121	1.02954	1.02958	1.00173	1.00557	1.00499	1.01342	1.03027	1.06121	0.985502	1.02461	1.01872
cgp_1842	0.998167	1.02326	1.02538	1.04403	1.01786	1.02999	1.03791	1.03168	1.0208	0.986824	1.01208	1.00214	1.03772	1.02412	1.02299	1.0402	1.05009	1.03341	1.03606	1.05277	1.01743	1.00496	1.02104	0.981397	1.01196	1.04496	1.04179	1.04865	1.01115	1.06521	1.03146	1.0042	1.01532	1.01564	1.03279	1.01482	1.02212	1.02039	1.00327	1.01215
dctX	1.03004	1.03637	1.02555	1.03339	1.00602	1.02516	1.02237	1.04757	1.02899	0.960452	0.993491	1.03167	1.00763	1.02174	1.02135	0.998834	1.03865	1.02463	1.03142	1.00487	1.0112	1.00249	1.01987	1.00734	1.03909	1.00825	1.03489	1.02122	1.04241	1.04407	0.996515	1.03807	1.01622	1.00992	1.02248	1.02145	1.04833	1.02234	1.03021	1.01856
cgp_2339	1.00121	0.983016	1.03282	1.01712	1.00973	1.03927	1.0289	1.05182	1.01583	0.945817	1.02465	1.02287	0.98403	1.02365	1.0021	1.02618	1.05012	1.01786	1.01558	1.04227	1.00139	0.994143	1.00889	0.979487	1.03632	1.00493	1.02658	1.00305	1.02089	1.04508	1.00894	1.03728	1.01612	1.03299	1.04066	1.00702	1.06285	1.01358	1.0002	1.03464
cgp_1198	1.01047	0.990682	1.03576	1.03437	0.997384	1.04021	1.05801	1.03067	0.997994	0.963768	0.994654	1.02609	1.02137	1.02894	1.04008	1.05716	1.03005	0.986582	1.02121	1.04219	1.03471	1.00662	1.01202	0.98443	1.09106	1.02972	1.00718	1.02081	1.04023	1.0606	1.04935	1.0509	1.01545	1.03389	1.04842	0.998074	1.03219	1.01941	1.00622	1.02289
ptpA	1.05479	0.993533	1.0386	1.04176	1.03332	1.02642	1.04113	1.03007	1.01995	1.00931	1.04387	1.0044	1.02388	1.02423	1.01554	1.0205	1.01165	1.01398	1.02981	1.00484	0.990764	0.990206	1.03347	0.981954	1.04777	1.03746	1.02718	1.00237	1.05745	1.02149	1.03497	1.02873	1.05191	1.00866	1.04583	1.04412	1.01766	1.0066	1.01607	1.00503
mob	1.02804	1.00836	1.02856	1.03808	1.021	1.03536	1.03125	1.01592	1.0004	0.990753	1.04906	0.995393	1.04437	1.02966	1.02618	1.01379	0.984773	1.01108	1.02051	0.992634	0.982228	1.0001	1.00977	0.96692	1.03707	1.00639	1.01014	1.02758	1.04432	1.02085	1.02515	1.01789	1.03484	1.00603	1.04495	0.977543	1.03349	1.01128	0.997015	1.01573
cgp_0080	1.02585	1.0169	1.04634	1.03635	1.01148	1.0298	1.01537	1.04488	0.993238	0.972999	1.02583	1.00074	1.03878	1.03378	1.01813	1.03217	1.02786	1.01319	0.989858	1.01429	1.02998	1.01497	1.03929	1.00888	1.0437	1.02946	1.05594	1.03463	1.05953	1.02725	1.0127	1.0225	1.05459	1.02786	1.05366	1.03234	1.00436	1.03043	0.995366	0.962328
cgp_2540	1.00015	1.01024	1.04533	1.07941	1.05374	1.05491	1.04546	1.06338	1.0031	0.973684	1.00091	1.0104	1.0362	1.03631	1.04468	1.0317	1.011	1.03826	1.03433	1.00366	1.0116	1.01268	0.997835	0.99893	1.00184	1.06062	1.03043	1.01263	1.04438	1.03883	1.05453	1.05455	1.03511	1.02733	1.02604	1.05962	1.02066	1.00789	1.00558	1.0461
cgp_2101	1.01964	0.995139	1.03134	1.03236	1.0377	1.08234	1.03542	1.02086	1.02289	0.990907	0.979752	1.00447	1.01972	1.03941	1.0204	1.02628	1.03061	1.03619	1.02652	0.974859	1.03153	1.03241	0.995373	0.950723	1.02694	1.03479	1.03893	1.02692	1.04247	1.05481	1.06752	1.05584	1.03621	1.00276	1.04309	1.06772	1.01593	0.991411	1.01883	1.02198
ribH	1.05374	1.00642	1.04514	1.0292	1.03275	1.05181	1.04737	1.05941	1.03275	0.99337	1.01754	1.0544	1.05796	1.02343	1.04401	1.0044	1.03078	1.02281	1.02778	1.04334	1.02685	0.999	1.03692	1.01859	1.04157	1.03049	1.06066	1.04519	1.04468	1.04307	1.02868	1.05239	1.05444	1.06196	1.02663	1.0675	1.05799	1.00395	1.02895	1.03448
lysG	1.06585	1.00268	1.04996	1.03455	1.02449	1.05293	1.05214	1.05222	1.02248	1.00461	1.02082	1.01943	1.04979	1.04213	1.02234	1.04121	1.0677	1.03776	1.01082	1.03174	1.02644	1.00017	1.01743	1.04155	1.03743	1.01209	1.03398	1.05511	1.06223	1.04753	1.03906	1.04435	1.02862	1.03125	1.04257	1.0563	1.05856	1.04641	1.01476	1.0311
cgp_0888	1.04648	0.988459	1.03954	1.04276	1.04209	1.02558	1.03863	1.05357	1.01716	0.983523	1.00874	1.0766	1.03794	1.01126	1.02439	1.04649	1.02094	0.994969	0.96747	1.03246	1.03681	1.00746	1.03049	1.01715	1.0496	1.02347	1.00566	1.03439	1.04961	1.0276	1.00779	1.03696	1.00807	1.05182	1.0374	1.03687	1.03553	1.00679	1.01195	1.02281
cgp_2204	1.06051	1.01493	1.0473	1.02631	1.01468	1.05185	1.04647	1.06064	1.04354	0.975803	1.01386	1.09761	1.02672	1.01023	1.0408	1.03951	1.01706	1.03441	1.04416	1.07468	1.01133	0.97913	1.04311	1.00923	1.06859	1.02362	1.03986	0.999373	1.05109	1.05205	1.03699	1.06639	1.06222	1.04506	1.07788	1.073	1.04294	1.02523	1.01724	1.02542
cgp_0639	1.02703	1.02989	1.01878	1.00914	1.02694	1.05511	1.04794	1.03371	1.01827	1.00028	1.06648	1.03274	1.04385	1.04081	1.03996	1.04594	1.0449	1.02545	1.03483	1.01231	1.02746	1.01572	1.04081	1.02291	1.03562	1.0314	1.04597	1.04369	1.04683	1.05025	1.04188	1.0282	1.02887	1.03733	1.03163	1.01467	1.0115	1.0414	1.04915	1.03307
cgp_0091	1.03569	1.01744	1.03858	1.02213	1.03882	1.03871	1.04068	1.01736	1.02025	1.01281	1.0361	1.0502	1.04709	0.997439	1.01771	1.02183	1.0274	1.03485	1.02694	1.00712	1.02798	1.0185	1.02841	1.04226	1.04277	1.02986	1.02939	1.03154	1.05231	1.03298	1.01912	1.02804	1.03912	1.03846	1.02641	1.02274	0.976918	1.02311	1.0232	1.02972
cgp_0921	1.02832	0.991707	1.04224	1.03482	1.02763	1.05143	1.07775	1.06176	1.00015	0.990191	1.02842	1.06783	1.02577	1.00914	1.03349	1.02637	1.05144	1.02913	1.04384	1.02237	0.988344	1.01712	1.0561	1.00672	1.03333	1.04109	1.03773	1.00982	1.02831	1.03908	1.03519	1.05131	1.04141	1.0414	1.03295	1.04196	1.01521	1.00776	1.04103	1.04038
ribC	1.01721	1.04477	1.02742	1.04038	1.04752	1.04767	1.03862	1.03845	1.03284	0.923153	1.0554	1.0254	1.0512	0.99741	1.0439	1.06733	1.01689	1.03388	1.01528	1.04802	0.986114	1.03143	1.02044	0.999615	1.02703	1.04334	1.03542	1.02209	1.02989	1.03861	1.04498	1.04855	1.01251	1.04712	1.03571	1.04254	1.00976	1.02269	1.02915	1.02897
ssuB	1.01944	1.01691	1.03079	1.01944	1.03694	1.06586	0.992341	1.05932	1.02855	1.01191	1.04443	1.09148	1.02773	1.05632	1.03912	1.03709	1.01788	1.01614	1.0248	1.02284	1.02498	1.0184	0.991734	1.02133	1.02703	1.02078	1.01976	1.02108	1.00892	1.03842	1.04601	1.05225	1.02633	1.05002	0.988446	1.04732	1.06359	1.0114	1.00534	1.02618
cgp_2254	1.00952	1.00331	1.05225	1.03119	1.02741	1.03355	1.04268	1.04397	1.03862	1.0436	1.02938	1.05872	1.04721	1.04187	1.01442	1.04293	1.0259	1.01766	1.03319	1.03604	1.03587	1.01749	1.00323	1.03096	1.01127	1.01496	0.990522	1.00309	1.02514	1.01353	1.02668	1.02928	1.0596	1.04027	1.01389	1.03118	1.04482	1.00691	1.01089	1.00404
cgp_2191	0.991589	1.01686	1.03326	1.03023	1.01119	1.06691	1.02295	1.00862	1.05833	1.01618	1.04904	1.02563	1.04969	1.04039	1.05015	1.05388	1.05907	1.02791	1.03808	1.02762	1.01567	0.993377	0.997223	0.999781	1.02319	0.999371	1.01516	1.02554	0.99359	1.03167	1.02806	1.03605	1.015	1.02414	1.07127	1.04173	1.05915	1.02598	1.01764	1.00115
hisG	1.03049	1.01932	1.03637	1.02339	1.03304	1.02516	1.03934	1.0261	1.01163	1.00586	1.01625	1.02856	1.02106	1.07852	1.03643	1.06531	1.00481	1.03935	1.02174	1.02478	1.01143	1.02911	1.01835	1.0205	1.02898	1.02049	1.05768	1.03199	1.01956	1.03914	1.05868	1.06481	1.03956	1.0201	1.03377	1.05737	1.11363	1.02611	1.03409	1.03515
cgp_1434	1.02918	1.03202	1.0323	1.0437	1.029	1.05439	1.0123	1.03287	1.02952	1.00968	1.03618	1.04518	1.0181	1.01832	1.03793	1.05309	1.07239	1.02234	1.0371	1.05191	0.959876	0.913136	1.03831	1.01325	1.06873	1.03493	1.04427	1.01993	1.04512	1.0427	1.0431	1.04188	1.05591	1.03738	1.03114	1.06308	1.04376	1.03552	1.04494	1.027
cgp_2193	1.05505	1.00163	1.03992	1.03535	1.02658	1.02221	1.00795	1.0309	1.02058	1.03671	1.00494	1.05393	1.04574	1.04065	1.03689	1.04386	1.05335	1.01864	1.04409	1.03748	0.963339	0.879529	1.00944	1.01322	1.02477	1.04493	1.0276	1.02554	1.03047	1.03346	1.02326	1.0149	1.05111	1.03275	1.03001	1.02712	1.02438	0.978853	1.03489	1.04426
cgp_1375	1.04589	1.01759	1.00869	1.01754	1.01388	1.02752	0.991208	1.03289	1.00973	1.01686	1.02292	1.05471	0.99265	1.07918	1.01075	1.0332	1.03468	1.04325	1.04224	1.0451	1.00768	0.976455	1.04546	1.01484	1.03746	1.00611	1.02398	1.06263	0.996256	1.02624	1.05897	1.04041	1.03689	1.01736	1.01852	1.06095	1.03696	0.986444	1.01687	1.03267
cgp_2118	1.07279	1.01002	1.01176	0.999225	0.977452	1.017	0.994899	1.01391	1.02307	0.951271	1.01239	0.996527	0.994441	1.04358	1.02823	1.02912	1.04144	1.01352	1.0314	1.06645	0.97775	0.944136	1.01934	1.00827	1.00885	0.998578	1.0292	1.02558	1.032	1.02845	1.04649	1.01894	1.04115	1.01411	1.01715	1.0334	1.03376	1.02226	1.02207	1.03306
cgp_1197	1.01265	1.07019	1.04278	1.04893	1.0164	1.07124	1.03291	1.07313	1.03379	1.04866	1.00929	1.0181	0.992914	1.02264	0.999502	1.04433	1.04456	1.06715	1.02334	1.05137	1.01697	1.04478	1.02785	1.03558	1.03134	1.02608	1.04532	1.01026	1.05977	1.04111	1.03388	1.06759	1.03666	1.03879	1.06911	1.02845	1.03917	1.00085	1.00231	1.03918
cgp_1483	1.03776	1.04123	1.03426	1.04743	1.01709	1.03352	1.03658	1.02328	1.03996	1.02908	0.97232	1.00902	1.05214	0.978117	1.03803	1.02838	1.03962	1.07065	1.03755	1.0603	1.03582	1.04892	1.05359	1.0328	1.01032	1.05027	1.04054	1.02162	1.04122	1.04182	1.04288	1.05552	1.03471	1.0303	1.04244	1.00392	1.03023	1.02112	1.04193	1.01901
codA	1.01827	1.06217	1.0049	0.996946	1.02444	1.0266	1.01287	1.01862	0.998747	1.05085	1.03568	0.946991	0.984617	1.0063	1.03817	1.02613	1.03622	1.04843	1.0178	1.03676	1.04917	1.01961	1.06199	1.05264	1.03402	1.02156	1.02197	1.02822	1.04034	1.02898	1.03281	1.04121	1.04669	1.03258	1.03827	1.0361	1.05859	1.05336	1.02693	1.0494
cgp_1002	0.990418	1.04722	1.00338	1.01829	1.00452	1.05396	1.07429	1.05517	0.986348	0.995093	1.02004	0.988703	1.0338	0.991534	1.03218	1.02336	1.0307	1.05609	0.977672	1.03642	1.04272	1.01568	1.00913	1.01556	0.987038	1.02028	1.03819	1.03168	1.01419	1.01812	1.0191	1.00995	1.02133	1.0176	1.05406	1.03159	1.0298	0.99013	1.0126	1.03365
cgp_1221	1.00863	1.05367	1.03271	1.03206	1.01394	1.01403	1.05845	1.04093	1.01645	0.996222	1.04354	0.996207	1.01249	1.00138	1.03982	1.05104	1.00686	1.04835	1.05209	1.03043	1.02122	0.977933	1.03261	1.04108	1.06541	0.978026	1.00141	1.02005	1.0191	1.03909	1.03461	1.06954	1.00081	1.02411	1.07264	0.94045	1.08325	0.998042	1.04468	1.02021
cgp_1109	1.02504	1.02824	1.0389	1.0529	1.03224	1.0789	1.02716	1.03297	1.02486	0.979192	1.05338	1.00498	0.992608	1.0307	1.06622	1.07332	1.0687	1.00735	1.00727	1.07726	1.00249	1.0099	1.05959	1.03803	1.07251	1.03215	1.05294	1.02321	1.02384	1.05653	1.05391	1.05805	1.04161	1.06326	1.03885	1.03793	1.05031	1.04831	1.04965	1.00754
cgp_1438	1.0417	1.00706	1.04106	1.04396	1.03412	1.04856	1.05477	1.04312	1.02016	1.04275	1.04124	1.03771	0.972227	0.996437	1.04373	1.0488	1.03852	1.02614	1.02887	1.05901	1.00225	0.987024	1.03075	0.963945	1.01707	1.05387	1.06097	1.04248	1.02842	1.01362	1.04183	1.02219	1.05229	1.03966	1.06208	1.00276	1.03298	1.03525	1.04131	1.03574
cgp_2131	1.0507	1.02871	1.04074	1.03294	1.01331	1.04033	1.00417	1.02714	0.982817	1.06456	1.02246	0.983493	0.999372	0.976715	1.05362	1.0625	0.993177	0.998385	0.999651	1.10088	1.00983	1.04645	1.03332	1.03935	1.04255	0.979751	1.07793	1.02519	1.00842	1.0189	1.04946	1.01915	1.02229	1.0621	1.09158	1.03124	1.07811	1.02657	1.04639	1.04557
cgp_3301	1.04567	1.03569	1.02452	1.02474	1.03545	1.02642	1.01864	1.03187	1.03149	1.00469	1.04542	1.02557	1.02167	1.03038	1.01209	1.03328	1.02334	1.02517	1.01489	1.02223	1.02419	1.00947	1.03555	1.02382	1.01516	1.02234	1.01667	1.02833	1.04054	1.02226	1.01632	1.01184	1.02214	1.00792	1.02567	1.01006	1.02136	1.03607	1.02674	1.02664
cgp_0042	1.01349	1.03927	1.02542	1.0133	1.02244	1.00706	1.03038	1.0431	1.02075	1.01518	1.04277	1.03024	1.01252	1.02827	1.02474	1.02854	1.02579	1.01015	1.02258	0.996267	1.02058	1.00131	1.02544	1.03337	1.01334	1.0158	1.01853	1.03221	1.035	1.0102	1.01483	0.996264	1.00344	1.02789	1.02283	1.00212	1.04365	1.01186	1.03533	1.00573
cgp_0192	1.02313	1.02463	1.02057	1.01538	1.0214	1.02141	1.01365	1.05652	1.02353	1.02442	0.99829	1.02186	0.995655	1.0226	1.01742	1.02328	1.04041	1.03361	1.01996	1.03521	1.0215	0.991159	1.03137	1.04364	1.03963	1.01238	1.00921	1.01789	1.03965	1.01078	1.02469	1.01309	1.02633	1.01884	1.01565	1.02021	1.02098	1.01649	1.0104	1.02066
cgp_0424	1.02426	1.03142	1.02011	1.01681	1.01676	1.01838	1.00632	1.05075	1.01919	1.02384	1.03271	1.02339	0.998569	1.01154	1.03127	1.02825	1.04415	1.02186	1.02021	1.03957	1.00257	1.01596	1.02559	1.00724	1.00735	1.00471	1.00794	1.01783	1.02692	1.03792	1.01905	1.02371	1.02659	1.02361	1.01451	0.994368	1.011	1.02162	1.02146	1.01902
ksdD	1.02119	1.02145	1.02787	1.0246	1.02298	1.03215	1.04712	1.02265	1.02161	1.02521	1.01627	1.03463	1.02431	1.04262	1.01761	1.02279	1.02044	1.0293	1.01861	1.00558	1.01887	0.997915	1.04398	1.01846	1.03666	1.02248	1.0208	1.00396	1.01248	1.00602	1.0035	1.02495	1.01522	1.00754	1.01896	1.02476	1.02549	1.02446	1.02011	1.01273
cgp_0223	1.03533	1.01385	1.0396	1.02912	1.01942	1.0281	1.03419	1.02024	1.03327	1.02056	1.004	1.02499	1.00133	1.0292	1.01214	1.00011	1.00499	1.04081	1.02185	1.00123	1.01776	1.00539	1.06063	1.03789	1.0241	1.02988	1.02021	1.02407	1.01316	1.01805	1.00914	1.01441	1.02049	1.00724	1.02278	0.990427	1.03136	1.00834	1.01436	1.03547
cgp_0054	1.0095	1.01912	1.05764	1.00502	1.01693	1.03156	1.01882	1.03399	1.01278	1.03554	1.02897	1.02868	1.00983	1.01938	1.00248	1.02653	1.00782	1.01934	1.00456	1.01513	1.01519	0.986508	1.02923	1.03721	1.01593	1.01462	1.01614	1.02163	1.03344	1.02933	1.01148	0.997181	1.05294	1.00506	1.03273	1.00072	1.01944	1.02761	1.01425	1.00566
cgp_0253	1.00684	1.03453	1.04242	1.02938	1.01818	0.999849	1.02186	1.01894	1.01918	1.02471	1.03372	1.0427	1.00395	0.998604	1.02616	0.999703	1.03105	1.01083	1.04946	0.982023	1.02979	1.00034	1.03497	1.01335	1.02537	1.03018	1.02912	1.01091	1.04358	1.03871	1.02529	1.00262	1.03909	1.03782	1.01441	0.999025	1.03007	1.02387	1.03405	1.02848
gntK	1.02813	1.01893	1.02978	1.03668	1.02698	1.02947	1.02194	1.02409	1.02887	1.00505	1.02179	0.993397	1.02215	1.02799	1.02534	1.0166	1.02307	1.02393	1.03125	0.998092	1.02915	1.01579	1.03061	1.03834	1.03165	1.01827	1.02312	1.02453	1.02623	1.00558	1.02271	1.02522	1.02583	1.03037	1.04774	1.04709	1.0077	1.01744	1.03774	1.03094
idhA1	1.01331	1.01005	1.01247	1.02567	1.03398	1.03276	0.995389	1.03759	1.01374	1.02953	1.02296	0.978272	1.03078	1.02476	1.02919	1.01138	1.02994	1.02411	1.0172	0.999726	1.01568	1.01247	1.01979	1.03192	1.02039	1.04086	1.01487	1.02273	1.03174	1.01391	1.02198	1.01812	1.00589	1.00775	1.0156	1.02451	0.98943	1.01642	1.02836	1.0346
citA	0.998622	1.01743	1.02784	1.00524	1.02971	1.01691	1.02118	1.02429	1.00943	1.0292	1.02703	1.01761	0.992837	1.02103	1.01638	1.01566	1.02802	1.02531	1.03784	1.00237	1.02395	1.01874	1.02139	1.04247	1.02634	1.04282	1.00465	1.01279	1.0225	1.00348	1.01083	1.00529	1.02588	1.02255	1.02087	1.02639	1.0238	1.02606	1.0349	1.02385
cgp_0212	0.997972	1.01004	1.01959	1.009	1.03143	1.02215	1.01655	1.01811	1.0384	1.01464	1.01095	1.01258	1.01156	1.01535	1.02008	1.00825	1.01493	1.03285	1.04113	1.01007	1.01163	1.01485	1.03227	1.03141	1.00767	1.03067	1.03241	1.01768	1.01715	0.984907	1.02335	1.02884	1.01449	1.00532	1.0252	1.04003	1.00734	1.02856	1.02953	1.02382
iolH	1.02288	1.03026	1.03003	1.03398	1.01845	1.02182	1.0363	1.02173	1.023	1.02587	1.03167	0.984396	1.00061	1.04587	1.02685	1.0023	1.02159	1.02418	1.03556	0.984404	1.00701	0.996638	1.0294	1.02798	1.00001	1.03416	0.994813	1.00565	1.01853	1.01511	1.02319	1.01648	1.01515	1.0386	0.998851	1.01453	1.00359	1.01342	1.01655	1.02829
cgp_0128	1.01238	1.00909	1.00427	1.0217	1.03947	1.05274	1.03223	1.01576	1.03614	1.02077	1.03567	0.996569	0.996223	1.02573	1.01709	1.00725	1.026	1.02177	1.05508	1.01152	1.01779	1.01413	1.04549	1.03241	0.994419	1.01588	1.0036	1.0098	1.03516	0.996883	1.03974	1.01601	1.0112	0.990321	1.03798	0.984451	1.02285	1.03229	1.03493	1.03111
cgp_3370	0.985336	1.02935	1.01125	1.02086	1.03391	1.01465	1.01677	1.01725	1.03014	1.01593	1.02058	1.03125	1.01785	1.02473	1.01625	1.0188	1.03081	1.04053	1.02003	1.00535	1.02626	0.999345	1.03214	1.0366	0.988306	1.01317	1.00673	0.992481	1.04676	1.01642	1.02843	1.00278	1.03321	1.00035	1.03082	1.00849	1.02184	1.02899	1.02956	1.00503
cgp_0019	0.995467	1.01518	1.01926	1.01057	1.01926	1.01389	1.01125	1.01358	1.0078	1.03038	1.0018	1.01028	1.04603	1.03208	1.02442	1.01307	1.02255	1.02798	1.025	0.994651	1.01091	1.00341	1.03262	1.01838	0.987962	1.01955	1.01943	1.02862	1.03703	0.996702	1.03627	1.00932	1.03188	0.998601	1.01135	1.01985	0.993745	1.02914	1.02813	1.02748
cgp_3375	0.980317	1.01928	1.02688	1.05021	1.02465	1.02795	1.04361	1.02145	1.03745	1.01565	1.05944	1.00223	1.03018	1.01676	1.03273	1.02163	1.047	1.02799	1.04439	1.00727	1.01422	1.01656	1.02558	1.05161	1.04728	1.03556	1.02123	1.04108	1.05175	1.02606	1.04581	1.03325	1.0381	1.03255	1.04299	1.00794	1.02469	1.03574	1.0328	1.03689
cgp_0186	0.986275	1.05184	1.01725	1.01864	1.02726	1.02737	1.06627	0.99252	1.03857	1.02101	1.04423	0.995987	1.03228	1.01408	1.04433	1.02879	1.02313	1.04177	1.0224	0.998606	1.01348	0.999099	1.0337	1.04805	1.02481	1.02836	0.989274	1.04572	1.04364	1.02703	1.03331	1.05507	1.01186	1.02435	1.0245	1.01436	1.00539	1.01847	1.02315	1.03274
cgp_3206	0.996104	1.04788	1.01344	1.03419	1.05398	1.00032	1.00246	1.01149	1.03265	1.00615	1.04511	0.980051	1.02842	1.01971	1.02183	1.04054	1.0123	1.02925	1.03415	1.03404	1.03471	1.01169	1.0262	1.02665	1.02615	1.04628	1.027	1.04829	1.00071	1.01911	1.01857	1.04037	0.999903	1.00491	1.02342	1.0165	1.01035	1.00717	1.03948	1.03206
cgp_0347	1.00868	1.02723	1.02974	1.04049	1.0102	1.04304	0.997934	1.01016	1.01627	1.03349	1.01125	0.989589	1.01071	0.995855	1.01654	1.01214	1.00991	1.01189	1.02677	1.00351	1.00219	0.98298	1.00961	1.0591	1.00465	1.05722	0.982296	1.03512	1.02009	1.02419	1.03136	1.02666	1.03951	1.02024	1.02216	0.968331	1.00531	1.01293	1.00381	1.01642
cgp_0009	1.04424	1.00727	1.00216	1.03012	1.01294	1.01595	1.00254	1.02549	1.01824	1.04744	1.02743	1.00212	1.01901	1.03535	1.01472	0.986578	1.01744	1.02533	1.02408	0.976997	1.02526	0.974248	1.01532	1.01017	1.01568	1.02676	0.99921	1.02864	1.01909	0.998847	1.02586	1.00316	0.998804	0.996666	1.04279	0.990036	1.0053	1.02784	1.00341	1.03466
cgp_2784	1.00953	1.01937	1.05151	1.01735	0.997145	1.01964	1.00904	1.03161	1.0272	1.01073	1.06337	0.981	1.02996	1.01585	1.02603	0.976613	1.02902	1.00545	1.02835	0.977695	1.02185	0.992637	1.00166	1.0404	1.01446	1.04548	1.01136	1.02181	1.00028	1.04344	1.04055	1.02761	0.997571	0.988388	1.00343	1.00992	1.04679	1.00059	1.03892	0.994955
cgp_0092	0.949808	0.991441	1.06009	1.0316	1.02697	1.04338	1.04342	1.03548	1.036	1.03081	1.06177	1.01857	1.00279	1.01009	1.02219	1.02537	1.02565	1.04573	1.04365	0.982697	1.00609	1.00827	1.07697	1.04217	1.01854	1.01317	1.03403	1.00753	1.01988	1.02568	1.04008	1.00211	1.01869	0.990055	1.03361	1.02671	1.01506	1.03973	1.04103	1.0373
cgp_0039	0.980352	1.01303	1.03943	1.03964	1.01822	1.04261	1.02816	1.03332	1.02453	1.02611	1.04429	1.04181	1.02004	1.02029	1.00977	1.03109	1.05602	1.04404	1.03584	0.991063	0.975573	0.986153	1.02248	1.01669	0.997899	1.04633	1.01264	1.03572	1.06512	1.02985	1.02517	1.0025	1.01722	0.993592	1.02962	1.0115	0.986233	1.03685	1.01534	1.01455
cgp_0588	1.01599	1.00078	1.06103	1.01719	1.02872	1.00431	1.04261	1.0409	1.02475	1.01463	1.04179	1.039	0.998742	1.00482	1.00282	1.03443	1.01778	1.0334	1.0147	1.01073	1.03095	1.01436	1.05637	1.04742	1.04029	1.0096	1.01092	0.992426	1.02597	1.03375	0.998822	0.966575	0.992231	0.994587	0.998052	1.01636	1.03154	1.05048	1.02637	1.00372
prpB1	1.01536	0.966576	1.02575	1.01784	1.02507	0.990074	1.04747	0.992311	1.00703	1.04523	0.99321	1.00426	1.01865	1.07721	1.00632	1.06289	1.04024	1.01725	1.01258	1.00216	1.04122	1.03172	0.999804	1.05537	1.06015	1.03665	0.977434	1.02001	0.989889	1.04894	1.03677	1.03778	1.01629	0.98301	1.04036	1.01859	1.00679	1.01791	1.02398	1.03301
rluC2	1.00928	1.00633	0.984659	1.02616	1.00884	0.999514	1.01134	0.996368	1.03117	1.06019	1.04062	1.01076	0.98553	1.08641	1.01414	1.02381	1.02649	1.00688	0.998403	0.981653	1.02765	1.01499	1.00997	1.02668	1.02054	1.02349	1.03075	1.03053	1.02131	1.00597	1.00333	0.970571	1.01393	0.967911	1.02767	1.03081	1.00517	0.980289	1.0013	1.01011
cgp_2124	1.02242	0.999536	1.0513	1.03452	1.03765	1.05553	1.0677	1.04583	1.0437	1.05215	1.00687	0.992037	1.05045	1.08194	1.01458	1.04564	1.03944	1.03819	1.03885	1.03572	1.06799	1.04504	1.02565	1.02703	0.9894	1.04604	1.03576	1.009	1.02744	1.03449	1.04808	1.04509	1.03797	1.02461	1.02107	1.00635	1.03013	1.02373	1.00872	0.994653
cgp_3030	1.02419	1.01903	1.02266	1.0159	1.05024	1.07075	1.01832	1.04159	1.03458	1.04551	1.01607	0.954426	1.04906	1.04302	1.01753	1.04313	1.03964	1.01431	1.03319	1.02096	1.06005	1.04644	1.05862	1.04978	0.994877	1.04044	1.02439	1.00542	1.02263	1.02582	1.0212	1.01349	1.03413	1.01582	1.03394	0.991818	1.02898	1.03806	1.03126	1.03613
cgp_1208	1.03716	1.01139	1.02704	1.04457	1.01207	1.05311	1.01734	1.04973	1.05964	1.03242	1.0136	0.973113	1.01579	1.06306	1.05632	1.03402	1.0127	1.05564	1.03526	1.04376	1.0505	1.01105	1.0512	1.01083	1.02944	1.02539	1.03059	1.01765	1.01846	1.05849	1.05108	1.03408	1.01631	1.01632	1.02545	1.03085	1.05549	1.02932	1.0401	1.03488
cgp_3225	1.04211	1.00474	1.01266	1.05713	1.03966	1.02569	1.03942	1.01626	1.03643	1.03702	1.0093	0.987082	1.08222	1.03901	1.03116	1.02023	1.04518	1.03581	1.07096	1.04892	1.00768	1.00837	1.04548	1.04769	1.00306	1.01616	1.04597	1.0411	1.03021	1.03054	1.01909	1.04833	1.05021	1.03051	1.04112	1.03021	1.01573	1.0355	1.03128	1.02152
mag	1.0125	1.04005	1.04596	1.03222	1.03084	1.01568	1.0168	1.04461	1.038	1.03446	0.98214	1.00542	1.05167	1.01802	1.04505	1.02692	1.04052	1.00866	1.02906	1.04376	1.00153	0.975905	1.03762	1.0317	0.974667	0.987376	1.03019	1.01741	1.04405	1.03629	1.01674	1.0358	1.01292	1.01762	1.04848	1.01724	1.00478	1.01074	1.04117	1.03416
cgp_2849	1.01272	0.994669	1.00154	1.01732	1.01451	1.0254	1.03385	1.00852	1.00871	1.00724	0.981399	0.978564	1.06929	1.03051	0.989694	1.03727	1.03141	1.062	1.07197	1.01161	1.01915	1.00006	1.01763	1.00321	0.998441	1.01461	1.01046	1.00481	1.01488	1.01508	1.02725	1.06575	0.99233	1.00271	1.01608	1.0514	1.014	1.01182	1.01711	1.00962
cgp_2126	1.01515	1.00521	1.03428	1.03164	1.04893	1.03271	1.04815	1.03654	1.05163	1.06766	1.0722	1.00976	1.03397	1.00603	1.01743	1.03627	1.03415	1.00171	1.02195	1.02599	1.01212	0.99412	1.00584	1.01547	0.993555	1.0186	0.999781	1.00977	0.995534	0.990849	1.00863	1.02889	1.01381	1.01126	1.04924	1.02784	1.03807	1.02784	1.01084	0.992798
cgp_1267	1.01344	1.00477	1.02499	1.01355	1.04112	1.02274	1.061	1.02267	1.03874	1.06161	1.05271	1.02908	1.043	0.987318	1.03122	1.03812	1.01604	1.04309	1.04819	1.02223	0.98374	0.973176	1.00587	0.993205	0.986092	1.03888	1.00815	1.02103	0.99687	1.01478	1.01895	1.00551	1.02124	1.02339	1.01757	1.02838	1.01325	1.00648	1.00629	1.0042
cgp_3322	1.01675	1.03343	1.02283	1.02236	1.08505	1.0273	1.02305	1.02755	1.04936	1.10268	1.03962	1.00184	1.06265	1.0189	1.01721	1.05007	1.04067	1.02009	1.02131	1.00992	1.03637	1.01251	0.96209	0.958375	0.992642	1.01999	1.01566	1.01796	1.00452	1.0236	1.01971	1.0089	1.02478	1.01803	1.03405	1.02816	1.01234	1.03098	1.0241	1.04003
cgp_2128	1.03162	1.00711	1.00945	1.02334	1.03065	1.00604	1.04271	1.04105	1.0583	1.06381	1.04144	0.972192	1.06615	1.04242	1.01388	1.04487	1.05685	1.02942	1.04659	0.98821	1.01682	0.990278	1.01329	0.979875	0.979476	1.00208	1.03185	0.992024	1.01704	0.971086	1.00872	1.00383	1.03435	0.991213	1.01261	1.03474	1.06394	0.999636	1.01806	1.00391
cgp_3256	0.998194	1.03791	1.00893	1.02545	1.03113	1.00543	1.02599	1.02939	1.02825	1.01037	1.01622	1.00513	1.0372	1.05765	0.999687	1.039	1.03579	1.00793	1.02956	1.01831	0.963915	0.983365	1.03037	1.01009	0.99228	1.02022	1.01706	1.00436	1.01573	1.01973	1.02637	1.04135	1.02153	1.02612	1.01893	1.05258	0.979022	1.02933	1.01423	1.02252
cgp_2538	1.01441	1.01096	0.987541	1.02731	1.04284	1.0139	1.02302	1.02934	1.03333	1.03313	1.01722	1.03225	1.01746	1.04253	1.01013	1.03406	1.03035	0.995286	1.00185	1.0198	0.955248	0.958042	1.0103	0.980858	1.00858	1.00712	1.017	1.00908	1.01436	1.0361	1.01901	1.02576	1.00682	1.02273	1.00283	1.03793	1.00244	0.98904	1.02021	1.02484
cgp_0155	0.960265	1.01855	0.988629	0.988732	1.02581	1.02414	1.038	1.0121	1.05278	1.05141	1.02031	0.988011	1.02666	1.03891	1.0152	1.06534	1.01623	1.03361	1.02121	1.00872	0.974422	0.985172	1.04735	1.03371	0.99789	1.02341	1.01835	0.995719	1.0377	1.03489	1.02804	1.02	1.01574	1.02514	1.04212	1.02999	1.01446	1.00984	1.02921	1.02672
cgp_0241	1.01535	1.0054	0.995728	1.00583	1.05024	1.01784	1.01298	0.99625	1.04938	1.04077	1.06818	1.00806	1.03033	1.01627	1.02992	1.01663	1.0196	1.04106	1.05074	1.0078	0.99541	0.925784	1.03351	1.04951	1.03644	1.02631	1.0059	1.04979	1.01181	0.985769	1.01509	1.00791	1.01592	1.03684	0.983597	1.01753	1.00014	1.02425	1.0362	1.00009
cgp_0448	1.0272	1.04973	1.03072	1.0495	1.09842	1.04305	1.03652	1.03236	1.05877	1.09218	1.04564	1.03334	1.06673	1.05573	1.01895	1.05768	1.0221	1.02724	1.02391	1.02062	0.961147	0.970139	1.06261	1.04764	1.03498	1.04489	1.02491	1.02431	0.988322	1.00902	1.05028	1.0471	1.01271	1.01015	1.01068	1.03875	1.00128	1.022	1.02368	1.02432
suhB	1.01379	1.02376	1.04092	1.04336	1.03175	1.043	1.04334	1.02541	1.06136	1.0656	1.02643	1.02629	1.03608	1.08921	1.02029	1.06822	1.03073	1.00932	1.01883	1.01826	0.949997	0.925953	1.0322	1.01431	1.04039	1.00276	1.0403	1.03224	1.02477	1.00003	1.02266	1.03593	1.01948	1.02726	1.02372	1.04775	1.0332	1.02277	1.01793	1.01415
cgp_0105	0.970713	1.01923	1.05306	1.0165	1.02349	1.03746	1.0016	1.03026	0.975252	1.06793	1.02531	1.02134	1.06164	1.01639	1.00322	0.997854	1.03348	1.0284	1.00254	1.03797	1.03943	0.994173	1.02224	1.05819	1.03912	0.992529	1.036	1.01661	1.02799	0.975584	1.00511	1.02858	0.974851	1.054	1.00836	1.03053	0.931992	1.01627	1.03339	1.03467
cgp_0698	0.965267	1.01478	1.04599	0.989512	1.02675	1.04675	1.04899	1.01281	1.11498	1.11724	1.041	1.07211	1.08461	1.04158	1.04282	1.03955	1.04499	1.02949	1.01288	1.09113	1.04504	1.04002	1.06942	1.03771	0.991027	1.00443	1.05031	1.03657	1.03481	1.04972	1.01931	1.02009	1.05856	1.07331	1.01841	1.03213	1.00518	1.02256	1.01958	1.07273
cgp_3122	1.00033	0.988908	0.998435	1.04968	1.02274	1.01778	0.986168	1.06572	1.089	1.0813	0.983912	1.07206	1.02195	1.06639	1.05484	0.984055	1.04474	1.02507	1.0307	1.09609	1.04307	1.02326	1.00649	1.11482	0.976993	1.04802	1.01003	1.02789	0.988069	1.0207	1.02028	1.04413	1.08297	0.979377	1.07168	1.05213	1.03714	1.01387	1.03374	1.03032
argH	1.04086	1.0412	1.0523	1.05015	1.04721	1.05341	1.0604	1.05203	1.04341	1.04763	1.02105	1.03745	1.02935	1.05532	1.04688	1.05842	1.03766	1.03502	1.04028	1.05119	1.03714	1.03379	1.02055	1.01461	1.05355	1.02825	1.04586	1.05021	1.05282	1.04704	1.05107	1.04818	1.05048	1.03989	1.04621	1.04163	1.05163	1.028	1.02995	1.03252
metH	1.05024	1.04387	1.03814	1.04434	1.04639	1.04711	1.05126	1.03703	1.04821	1.03721	0.998148	1.02169	1.01864	1.03878	1.05059	1.05433	1.03766	1.02339	1.03091	1.04282	1.02698	1.01168	1.02894	1.01335	1.04779	1.05341	1.04247	1.03784	1.03039	1.04156	1.03823	1.04775	1.0455	1.04189	1.03776	1.05277	1.04515	1.02191	1.03264	1.03005
cgp_1658	1.04403	1.04232	1.03995	1.05443	1.04971	1.06011	1.06478	1.04479	1.05664	1.0418	1.0122	1.05063	1.02298	1.05	1.05593	1.06114	1.03226	1.03616	1.03654	1.06376	1.00916	1.01455	1.01851	1.02924	1.0446	1.06219	1.06301	1.04588	1.06149	1.04554	1.03744	1.03256	1.03651	1.02223	1.05729	1.02603	1.05535	1.03111	1.03343	1.01944
ugpB	1.06027	1.03415	1.03768	1.04698	1.05269	1.05992	1.04404	1.05604	1.0328	1.01831	1.04636	1.05547	1.05435	1.05455	1.0243	1.06953	1.04294	1.03309	1.02945	1.04775	1.03422	1.01534	1.00748	1.00907	1.02868	1.05809	1.05481	1.03006	1.05965	1.03039	1.04238	1.07769	1.04854	1.03995	1.02779	1.04951	1.06609	1.03345	1.0175	1.01751
cgp_2602	1.02781	1.03113	1.0345	1.07542	1.04066	1.05903	1.04066	1.03259	1.04584	1.01776	1.03021	1.05976	1.03381	1.05162	1.05756	1.05323	1.05007	1.03711	1.03669	1.03323	1.02762	1.01971	1.02113	1.03119	1.02349	1.0463	1.04039	1.03022	1.07361	1.06615	1.03988	1.07517	1.0422	1.04083	1.06802	1.05382	1.02707	1.01952	1.03334	1.01845
mcmB	1.02218	1.05497	1.0579	1.02756	1.04577	1.04968	1.05085	1.03788	1.04145	1.04603	1.05041	1.0391	1.04419	1.02499	1.04267	1.05274	1.04024	1.04266	1.03176	1.03331	1.04432	1.05514	1.01571	1.01266	1.05623	1.05459	1.05228	1.05318	1.03209	1.05494	1.0627	1.05716	1.03463	1.04516	1.06293	1.05936	1.0583	1.0332	1.04401	1.0316
ribA	1.04154	1.04704	1.04646	1.05561	1.05688	1.05036	1.04797	1.05066	1.04293	1.02091	1.03882	1.06235	1.04916	1.02495	1.0546	1.04488	1.03607	1.04331	1.04522	1.05101	1.03051	1.02642	1.02225	1.00736	1.04403	1.03905	1.04696	1.04836	1.03849	1.05626	1.05483	1.0489	1.04448	1.04091	1.04327	1.06434	1.05873	1.03378	1.03837	1.03198
cgp_1743	1.02803	1.04284	1.05689	1.04308	1.03418	1.06306	1.05167	1.05384	1.01325	1.0123	1.03557	1.02889	1.03637	1.00025	1.05553	1.04949	1.05105	1.04179	1.03544	1.03961	1.03801	1.02917	1.01901	1.0086	1.03762	1.0353	1.04751	1.05598	1.04958	1.06648	1.05968	1.03876	1.0568	1.05106	1.03389	1.03417	1.06497	1.02492	1.04256	1.02749
cgp_2318	1.03823	1.03278	1.04463	1.04705	1.02323	1.04166	1.05911	1.06161	1.01921	1.04255	1.02565	1.0413	1.03749	1.01709	1.03695	1.05157	1.03751	1.03461	1.02788	1.02279	1.05529	1.02379	1.02094	1.02812	1.03597	1.0231	1.03472	1.02477	1.03014	1.04257	1.03717	1.0327	1.04664	1.03799	1.05308	1.04342	1.03945	1.03058	1.03684	1.02434
pimT	1.03886	1.04978	1.0568	1.05501	1.03422	1.05301	1.05078	1.04961	1.03732	1.02637	1.0458	1.0696	1.04083	1.02167	1.04577	1.04163	1.05598	1.01054	1.02353	1.01807	1.02304	1.04122	1.0202	1.02338	1.03024	1.05683	1.04135	1.00522	1.05794	1.03427	1.0343	1.02988	1.04912	1.04659	1.03217	1.06464	1.05005	1.02971	1.05635	1.01776
cgp_1506	1.05152	1.0697	1.06624	1.04519	1.0525	1.07254	1.05631	1.06209	1.0475	1.06803	1.02602	1.03481	1.05351	1.0392	1.0533	1.06991	1.04922	1.06011	1.05042	1.03181	1.03535	1.05493	1.02755	1.04525	1.05275	1.0723	1.05809	1.03994	1.07293	1.04478	1.06139	1.06906	1.07596	1.08033	1.05452	1.06611	1.05536	1.04615	1.0556	1.04202
cgp_1562	1.05277	1.04833	1.06559	1.05632	1.04819	1.05782	1.05686	1.07542	1.05075	1.05373	1.0321	1.02498	1.04357	1.04795	1.05305	1.0686	1.0445	1.04282	1.05222	1.02475	1.02097	1.02125	1.02342	1.03944	1.02951	1.04148	1.05849	1.0436	1.04246	1.05664	1.05891	1.05397	1.05472	1.04807	1.05943	1.05439	1.08535	1.03632	1.04593	1.03514
menG	1.0305	1.05225	1.0535	1.06335	1.06366	1.09147	1.06646	1.07214	1.0458	1.06216	1.03361	1.02035	1.04638	1.06169	1.04569	1.03795	1.04345	1.03291	1.04147	1.04123	1.03225	1.02876	1.06967	1.04499	1.06643	1.06419	1.05546	1.03027	1.04005	1.073	1.05802	1.06473	1.05919	1.04242	1.03663	1.04728	1.03415	1.04219	1.05123	1.04355
pctB	1.06268	1.02225	1.05747	1.06791	1.05829	1.05661	1.05391	1.06791	1.05922	1.04771	1.06214	1.04874	1.04407	1.03538	1.04819	1.07606	1.02731	1.03331	1.05661	1.04214	1.04616	1.015	1.04287	1.04961	1.0465	1.04581	1.05878	1.04384	1.07976	1.05406	1.02654	1.06654	1.05686	1.07671	1.00122	1.07491	1.07907	1.02168	1.02993	1.04795
qor2	1.06434	1.0625	1.07697	1.06953	1.06182	1.08273	1.05535	1.04665	1.05323	1.0449	1.03357	1.048	1.03408	1.05305	1.02525	1.04236	1.06255	1.03805	1.06857	1.05637	1.03016	1.0528	1.04702	1.04813	1.06306	1.01918	1.08883	1.05501	1.07536	1.06067	1.0633	1.05723	1.03097	1.04333	1.05289	1.01735	1.06959	1.03187	1.03773	1.06507
dkgX	1.07958	1.05735	1.06823	1.05764	1.05933	1.07406	1.0552	1.0629	1.07437	1.04167	0.999546	1.06235	1.06115	1.00933	1.04075	1.04929	1.04838	1.03796	1.05067	1.06664	1.05278	1.037	1.05938	1.06564	1.02455	1.02191	1.05239	1.05472	1.06812	1.04169	1.01056	1.06665	1.04223	1.0196	1.06303	1.02704	1.02855	1.04382	1.04339	1.02739
rbsK1	1.08965	1.04187	1.04861	1.04118	1.04864	1.06316	1.05132	1.04328	1.05801	1.04727	1.01985	0.997483	1.06192	1.07425	1.03643	1.06319	1.06256	1.02828	1.04402	1.05285	1.01367	1.02134	1.05224	1.03235	1.05927	1.04043	1.03992	1.03063	1.02828	1.01804	1.05592	1.05935	1.0416	1.03214	1.06646	1.05345	1.04986	1.04522	1.03989	1.02805
cgp_1740	1.07671	1.0344	1.07067	1.05387	1.03883	1.04248	1.05142	1.05333	1.03766	1.02307	1.02292	1.00513	1.05382	1.06637	1.04784	1.049	1.05207	1.04308	1.03982	1.06865	1.03441	1.02613	1.06515	1.01574	1.03701	1.0452	1.05235	1.01729	1.03805	1.03373	1.04841	1.06168	1.05834	1.04234	1.04324	1.05841	1.05152	1.03648	1.02638	1.03455
tagA2	1.06566	1.02904	1.05373	1.05268	1.06868	1.04263	1.0312	1.05889	1.05057	1.03962	1.0208	1.03901	1.05432	1.07036	1.031	1.03189	1.06364	1.04332	1.04093	1.07715	1.04237	1.03665	1.05376	1.04745	1.06194	1.05247	1.04081	1.04606	1.0305	1.01682	1.04866	1.04483	1.03907	1.03096	1.02602	0.998469	1.08469	1.03719	1.04797	1.03998
pcaB	1.04366	1.06534	1.04888	1.031	1.03111	1.0425	1.0328	1.02341	1.0398	1.02246	1.0306	1.03527	1.07475	1.02412	1.03893	1.04255	1.03063	1.02575	1.04419	1.01858	1.0448	1.03223	1.05232	1.06103	1.04249	1.04964	1.03438	1.06032	1.04644	1.01142	1.03852	1.05891	1.06616	1.05286	1.04561	1.05187	1.03585	1.0418	1.04259	1.03361
cgp_0121	1.03698	1.06469	1.04658	1.06328	1.04424	1.05137	1.01994	1.02561	1.03269	1.05315	1.05164	1.03428	1.03629	1.04319	1.00614	1.04032	1.03583	1.03976	1.03983	1.03679	1.02412	1.03683	1.0521	1.04874	1.01099	1.04164	1.02514	1.04105	1.02849	1.03099	1.04533	1.04883	1.04261	1.03936	1.04298	1.04754	1.06371	1.05652	1.04523	1.03563
cgp_3399	1.04636	1.04184	1.03889	1.0473	1.04208	1.06272	1.03641	1.01773	1.03227	1.04178	1.06582	1.01693	1.01867	1.06813	1.02021	1.05321	1.06991	1.04783	1.04488	1.04675	1.04017	1.01826	1.04616	1.08079	1.05212	1.05087	1.05383	1.06143	1.02668	1.05762	1.04311	1.0448	1.06093	1.03293	1.02917	1.06251	1.0317	1.04329	1.05161	1.04567
cgp_1530	1.02185	1.04389	1.07097	1.05263	1.03733	1.07089	1.06271	1.02916	1.05097	1.0772	1.04867	1.0514	1.04597	1.05402	1.05994	1.06516	1.04579	1.05021	1.02274	1.05403	1.02739	1.03563	1.03359	0.993314	1.04983	1.08067	1.07648	1.0541	1.0569	1.03332	1.05047	1.0388	1.05775	1.03859	1.04266	1.05544	1.0928	1.01125	1.02846	1.03997
cgp_1408	1.05904	0.994328	1.06738	1.06143	1.03061	1.06812	1.08641	1.02517	1.04964	1.08818	1.04494	1.05297	1.04674	1.06155	1.04322	1.05005	1.02596	1.032	1.04353	1.03863	1.01454	1.01033	1.05656	1.04683	1.02085	1.06735	1.04433	1.06747	1.0385	1.00513	1.04612	1.06372	1.0337	1.05187	1.04993	1.02312	1.07306	1.02883	1.03853	1.02475
ppc	1.04294	1.04028	1.06983	1.06078	1.06522	1.06018	1.05821	1.05885	1.05835	1.05516	1.05323	1.01402	1.03456	1.06242	1.04845	1.0515	1.04323	1.02021	1.00706	1.06149	1.02709	1.00582	1.0384	1.02252	1.05856	1.03256	1.06924	1.06345	1.03758	1.0476	1.05876	1.06319	1.03666	1.04848	1.06485	1.04192	1.06826	1.04592	0.999217	1.03816
cgp_2084	1.03388	1.05139	1.04444	1.04163	1.04169	1.04408	1.03897	1.05703	1.0416	1.03482	1.04719	1.01467	1.02558	1.06179	1.03889	1.05802	1.04262	1.01909	1.01034	1.04898	1.0065	0.965253	1.03361	1.01756	1.03654	1.02182	1.05276	1.03531	1.04571	1.05252	1.05778	1.05281	1.03437	1.04744	1.03393	1.04234	1.06624	1.0228	1.0345	1.02707
cgp_1733	1.04697	1.03057	1.06453	1.06166	1.04537	1.0611	1.08444	1.0578	1.05518	1.00721	1.04643	1.02439	1.05426	1.05588	1.0245	1.05476	1.04851	1.0423	1.02212	1.05182	1.04967	1.0014	1.0202	0.995578	1.04787	1.04094	1.04589	1.05652	1.04456	1.05876	1.05398	1.05139	1.07129	1.08077	1.0437	1.0485	1.0672	1.01985	1.00437	1.01955
pacL	1.03083	1.04021	1.05747	1.04874	1.03368	1.06036	1.06219	1.05765	1.04793	1.01672	1.06424	1.04022	1.03695	1.04249	1.04261	1.03739	1.03053	1.00856	1.02968	1.04263	1.01152	1.02136	1.02414	0.998726	1.05036	1.048	1.04066	1.0446	1.03019	1.05083	1.07554	1.04769	1.04369	1.05001	1.05924	1.0229	1.05526	0.998152	1.01476	1.02337
cgp_1423	1.03654	1.02697	1.03899	1.04881	1.05614	1.07586	1.04739	1.08061	1.04301	1.01323	0.997654	1.00776	1.04219	1.04293	1.04458	1.04865	1.03639	1.02956	1.04435	1.07679	1.0641	1.03188	1.02862	0.990533	1.0418	1.04963	1.0779	1.04166	1.03722	1.03747	1.03635	1.04475	1.04779	1.04773	1.04261	1.03137	1.04818	1.02372	1.0319	1.01758
cgp_1730	1.00828	1.03517	1.05731	1.03033	1.05137	1.05576	1.06502	1.04636	1.0423	1.01999	1.02372	1.04186	1.02942	1.02508	1.03989	1.04898	1.05278	0.998674	1.02726	1.06301	1.0531	1.01339	1.05131	0.99986	1.01865	1.04897	1.04942	1.04532	1.0576	1.05626	1.05832	1.03809	1.02006	1.01935	1.05915	1.04755	1.03802	1.04938	1.02946	1.00648
cgp_1682	1.07047	1.04146	1.0592	1.07313	1.0158	1.07082	1.0797	1.05929	1.06733	1.02934	1.03843	1.04658	1.02045	1.03213	1.03082	1.0224	1.04136	1.02211	1.03551	1.08245	1.02412	1.00981	1.04048	1.00694	1.02219	1.04729	1.05305	1.03502	1.05973	1.06864	1.04572	1.00925	1.0724	1.04182	1.03585	1.03724	1.06641	1.01229	1.02777	1.04677
cgp_1645	1.04479	1.06035	1.05197	1.03324	1.04072	1.06416	1.06447	1.06893	1.05416	1.03087	1.02997	1.00199	1.02558	1.06581	1.03452	1.03228	1.01222	1.00775	1.01695	1.06524	1.03255	0.994941	1.00694	1.00874	1.02227	1.05584	1.04386	1.04829	1.03724	1.03801	1.01687	1.02416	1.06273	1.04628	1.02174	1.07264	1.06453	1.01312	1.04021	1.01975
rbsA	1.02585	1.05041	1.05487	1.05624	1.04907	1.04586	1.06546	1.04229	1.06625	1.02492	1.06963	0.994123	1.03956	1.04246	1.03512	1.03016	1.01554	1.05906	1.05222	1.02108	1.04537	1.03939	1.04954	0.986626	1.03004	1.02974	1.04279	1.06337	1.03486	1.05384	1.04378	1.04763	1.03277	1.03772	1.05312	1.01938	1.01168	1.01556	1.04161	1.05079
cgp_1628	1.02826	1.02552	1.04527	1.04265	1.04507	1.04135	1.03784	1.03763	1.05726	1.05402	1.04973	1.0116	1.05547	1.03238	1.01731	1.02866	1.03588	1.02699	1.05151	1.03866	1.04877	1.08183	1.00882	1.01131	1.05615	1.01718	1.03379	1.05434	1.04331	1.04255	1.05044	1.03534	1.03604	1.03954	1.02658	1.05277	1.04656	1.01856	1.02726	1.01584
cgp_1556	1.0436	1.04593	1.05735	1.07597	1.06473	1.06425	1.06549	1.06434	1.06596	1.10026	1.04351	1.01319	1.04929	1.01552	1.02762	1.04217	1.0506	1.02556	1.03169	1.03454	1.0203	1.0188	1.02844	1.00429	1.02725	1.02974	1.03882	1.03992	1.0375	1.02263	1.03859	1.05609	1.0193	1.02361	1.04597	1.04406	1.03411	1.01074	1.02023	0.999021
cgp_1618	1.02808	1.02088	1.06121	1.03207	1.072	1.04172	1.0652	1.0504	1.05765	1.06339	1.0271	1.01087	1.03235	1.03564	1.04122	1.03951	1.01154	1.00946	1.03847	1.0733	1.03064	1.02699	1.01909	0.969167	1.017	1.03712	1.06112	1.03919	1.02734	1.02911	1.06554	1.06339	1.0266	1.04534	1.03072	1.04532	1.02639	1.02742	1.0096	1.03028
tcbF	1.04227	1.03453	1.04019	1.03009	1.04622	1.0359	1.04235	1.0397	1.04122	1.03043	1.03545	1.02565	1.02595	1.05756	1.01721	1.04231	1.02642	1.02219	1.02107	1.03038	1.0263	1.0147	1.03494	1.04766	1.01309	1.02155	1.03243	1.03084	1.02888	1.027	1.03834	1.03672	1.03634	1.04226	1.05284	1.02232	1.04503	1.0453	1.03965	1.02703
cgp_3387	1.0468	1.05111	1.02123	1.02773	1.04357	1.02417	1.03412	1.03593	1.03598	1.02948	1.04043	1.03525	1.03575	1.03666	1.03065	1.04387	1.02699	1.0374	1.03443	1.04772	1.01363	1.00909	1.02387	1.0538	1.04233	1.01246	1.02811	1.02778	1.02211	1.02976	1.02863	1.04056	1.02761	1.01998	1.03406	1.02837	1.04742	1.0507	1.04177	1.02952
argG	1.08171	1.03284	1.04608	1.04726	1.05439	1.03916	1.03798	1.03738	1.03531	1.03108	1.03545	1.04783	1.03126	1.03544	1.03223	1.04131	1.03835	1.03321	1.02159	1.03374	1.02719	1.03706	1.02582	1.00944	1.03356	1.03096	1.03608	1.03637	1.02749	1.02968	1.04008	1.05608	1.02803	1.0233	1.03663	1.01891	1.03712	1.02124	1.02953	1.02864
rbsB	1.02959	1.03249	1.03479	1.01101	1.03736	1.03425	1.00655	1.04295	1.02585	1.04155	1.02201	1.05166	1.02293	1.04078	1.058	1.01832	1.02883	1.05191	1.05441	1.02586	1.02312	1.03048	1.02367	1.01158	1.02624	1.01923	1.02412	1.03733	1.02214	1.03845	1.04644	1.05906	1.02187	1.01165	1.05881	1.02939	1.04523	1.0278	1.02803	1.02343
fdhD	1.04217	1.02341	1.03666	1.00773	1.0243	1.04174	1.04457	1.04628	1.03956	1.03255	1.01557	1.05645	1.05191	1.03062	1.03182	1.01607	1.04349	1.05271	1.04093	1.06536	1.03205	1.03031	1.04763	1.03589	1.02136	1.03064	1.01323	1.04667	1.02375	1.04461	1.02391	1.04331	1.04772	1.03632	1.04188	1.04005	1.07755	1.03262	1.0468	1.04385
cgp_1321	1.0493	1.03603	1.02603	1.01997	1.03314	1.03228	1.04688	1.03027	1.04164	1.01559	0.994764	1.06006	1.05528	1.03261	1.02961	1.04095	1.03394	1.04059	1.04098	1.04312	1.04318	1.03998	1.02138	1.04502	1.01079	1.0005	1.04434	1.01771	1.01415	1.04056	1.03433	1.07301	1.03998	1.02297	1.03707	1.05538	1.03941	1.03296	1.04988	1.04918
cgp_2659	1.0495	1.05578	1.02247	1.02141	1.03095	1.05292	1.04122	1.04274	1.04176	1.03147	1.04199	1.0849	1.03209	1.02257	1.05019	1.04727	1.03159	1.05938	1.0445	1.04912	1.05786	1.02456	1.03419	1.05454	1.04417	1.03994	1.05405	1.04216	0.996425	1.06067	1.03257	1.00686	1.03978	1.03541	1.04314	1.03441	1.01317	1.03966	1.05009	1.06201
cgp_0191	1.0758	1.01756	1.02661	1.01633	1.05291	1.01614	1.0569	1.029	1.03198	1.03894	1.02472	1.09653	1.04893	1.02605	1.05459	1.02051	1.0422	1.0335	1.04217	1.01692	1.00632	1.00569	1.03903	1.03941	1.05134	1.02796	1.04394	1.048	1.02481	1.04487	1.02548	1.0354	1.02119	1.03061	1.05338	1.03832	1.01264	1.03812	1.03812	1.03975
cgp_1852	1.06391	1.03116	1.06648	1.0573	1.03939	1.05046	1.05736	1.06369	1.0353	1.02233	1.02208	1.05517	1.06222	1.04229	1.02633	1.02603	1.03663	1.03081	1.02492	1.04789	1.03852	1.01177	1.03598	1.00421	1.04826	1.02368	1.02372	1.02726	1.03759	1.04845	1.04442	1.03348	1.05687	1.06134	1.02863	1.03755	1.02955	1.0124	1.02858	1.01927
thiC	1.04031	1.02657	1.07083	1.04972	1.03747	1.05932	1.02225	1.06785	1.04541	1.04079	0.996922	1.06619	1.02759	1.03069	1.01228	1.0404	1.05891	1.03032	1.04099	1.03665	1.05102	1.01259	1.0355	1.00949	1.07442	1.0374	1.02182	1.01369	1.02906	1.04749	1.02679	1.0382	1.06078	1.07219	1.02144	1.0238	1.03816	1.01067	1.01916	1.01663
leuB	1.04734	1.05628	1.05558	1.05518	1.04784	1.06169	1.04522	1.05496	1.02664	1.05039	1.03482	1.04086	1.0158	1.01379	1.04008	1.02967	1.04063	1.01725	0.997794	1.03719	1.04658	1.0145	1.02429	1.04031	1.06706	0.998792	1.04392	1.00043	1.03122	1.03654	1.03668	1.04428	1.04536	1.05869	1.03295	1.04173	1.03	1.03422	1.03853	1.03843
cgp_1636	1.04483	1.04979	1.06887	1.06185	1.06815	1.04313	1.0396	1.04129	1.03951	1.00881	1.02949	1.06235	1.0426	1.01644	1.03926	1.03392	1.00507	1.06803	1.04979	1.03847	1.04911	1.02676	1.01855	0.999003	1.0762	1.05988	1.05964	1.05529	1.02546	1.04083	1.06193	1.04017	1.01186	1.03954	1.03233	1.02507	1.04292	1.02796	1.01924	1.03606
cgp_1680	1.03021	1.05036	1.04026	1.02321	1.04426	1.02127	1.01107	1.01863	1.04336	1.00944	1.04211	1.07075	1.04042	1.02891	1.04655	1.03547	1.01621	1.03602	1.05842	1.05631	1.03948	1.04495	1.00898	1.0253	1.05388	1.0419	1.05567	1.03258	1.0425	1.04892	1.06006	1.06813	1.05358	1.04106	1.03749	1.01962	1.04093	1.03034	1.03234	1.03775
mcmA	1.04794	1.05805	1.04067	1.04557	1.04429	1.06512	1.0587	1.06911	1.03575	1.01901	1.03728	1.02596	1.04416	1.02698	1.04918	1.05207	1.0328	1.02313	1.0315	1.07105	1.03544	1.04613	1.02735	1.02001	1.05075	1.05397	1.04442	1.0407	1.05528	1.05984	1.05047	1.04892	1.06299	1.06367	1.06101	1.06448	1.04219	1.03651	1.03273	1.03218
cgp_1843	1.06356	1.04664	1.05033	1.05532	1.04465	1.05404	1.0529	1.05202	1.03125	1.03516	1.05093	1.03005	1.04266	1.04039	1.04092	1.06141	1.0462	1.01946	1.04363	1.05459	1.04165	1.02315	1.02322	1.00976	1.03696	1.0502	1.04947	1.04097	1.03997	1.0422	1.055	1.06291	1.05117	1.05646	1.04573	1.05667	1.03807	1.03667	1.03004	1.03643
tetA	1.07049	1.03385	1.04598	1.04498	1.04535	1.05287	1.06698	1.06086	1.06321	1.02838	1.00853	1.03803	1.05048	1.03262	1.05103	1.06266	1.04153	1.03363	1.04219	1.07075	1.0249	1.04482	1.02708	1.01973	1.04933	1.05518	1.05665	1.05488	1.03047	1.05306	1.05963	1.04886	1.06406	1.04854	1.05388	1.05014	1.0562	1.02676	1.04639	1.04269
nanH	1.04261	1.05088	1.05067	1.04497	1.04932	1.05041	1.04964	1.06032	1.05286	1.05737	0.992254	1.03818	1.05782	1.0166	1.05475	1.04961	1.03899	1.04979	1.05003	1.06172	1.04238	1.01756	1.01415	1.0159	1.04541	1.04838	1.02518	1.05977	1.03947	1.03221	1.0577	1.02822	1.0596	1.04986	1.03796	1.03494	1.04516	1.04762	1.02762	1.03471
cobL	1.06047	1.02462	1.0561	1.06363	1.06025	1.04534	1.05674	1.06096	1.03585	1.0473	1.01642	1.03047	1.05628	0.985999	1.04752	1.05323	1.04436	1.0305	1.05478	1.05555	1.03758	1.02584	1.0143	1.02706	1.0451	1.03468	1.0422	1.04838	1.04095	1.05901	1.05451	1.04566	1.03901	1.07646	1.04813	1.0414	1.02735	1.00875	1.02566	1.04766
speE2	1.04688	1.02224	1.06863	1.05601	1.03352	1.03992	1.02059	1.02604	1.02257	1.05439	1.02805	1.02774	1.0031	1.04507	1.06206	1.03281	1.04061	1.04286	1.05327	1.06093	1.05279	1.01028	1.05237	1.00497	1.02171	1.05288	1.03053	1.05665	1.02664	1.05315	1.04617	1.05406	1.04528	1.06642	1.04165	1.06093	1.05083	1.01269	1.03338	1.03121
cgp_1648	1.05694	1.03968	1.04448	1.02544	1.02825	1.03874	1.03645	1.04623	1.04706	1.03701	1.03453	1.04142	1.05017	1.0452	1.0436	1.04604	1.01573	1.0395	1.03413	1.06249	1.03762	1.02891	1.00771	1.01062	1.03666	1.02163	1.04555	1.04198	1.0469	1.04309	1.05162	1.05914	1.0484	1.061	1.0381	1.04174	1.06231	1.03332	1.0392	1.03501
cgp_1621	1.02203	1.04669	1.0565	1.03565	1.04291	1.04945	1.04277	1.03687	1.03063	1.02312	1.00055	1.06252	1.04493	1.04502	1.02199	1.02609	1.02005	1.02925	1.02878	1.07677	1.05543	1.02535	0.987563	0.990375	1.03284	1.02998	1.04103	1.04135	1.04165	1.04774	1.04298	1.04367	1.02033	1.041	1.03711	1.05306	1.0506	1.03279	1.03571	1.03863
cgp_1296	1.03731	1.06056	1.04437	1.04039	1.02864	1.05533	1.02535	1.01982	1.02632	1.03859	0.993796	1.03007	1.02982	1.01302	1.03594	1.05567	1.02471	1.01825	1.07105	1.0707	1.01112	1.00805	1.02223	0.993744	1.06476	1.02435	1.02723	1.03094	1.02212	1.03335	1.04264	1.04411	1.04535	1.03259	1.04872	1.04216	1.02946	1.04544	1.03159	1.03754
cgp_1832	1.05183	1.02012	1.05357	1.06234	1.04421	1.0425	1.06253	1.04825	1.01714	1.04271	1.01794	1.02684	1.04571	1.04089	1.04993	1.055	1.03295	1.03625	1.04333	1.04611	1.04997	1.02376	1.0401	1.02161	1.03322	1.03772	1.04804	1.05916	1.04581	1.03369	1.05597	1.04996	1.01773	1.05067	1.03528	1.04001	1.05846	1.02276	1.0477	1.04706
pctC	1.05965	1.03094	1.05925	1.03437	1.04038	1.03941	1.05515	1.04798	1.02246	1.05501	1.02368	1.05379	1.05473	1.02404	1.05078	1.04957	1.03106	1.02563	1.03872	1.06733	1.02703	1.02345	1.02544	1.03495	1.01445	1.02686	1.0353	1.02487	1.03758	1.03599	1.05822	1.06483	1.02569	1.0396	1.04456	1.02913	1.05749	1.02364	1.04287	1.03707
cgp_1687	1.07537	1.03104	1.06118	1.02657	1.03315	1.03815	1.04338	1.05507	1.04145	1.02315	0.988445	1.05638	1.04421	1.06328	1.04713	1.08174	1.01413	1.00572	1.03524	1.08407	1.03995	1.00312	1.02102	1.0217	1.03108	1.04052	1.03045	1.04941	1.02314	1.03806	1.05886	1.05062	1.02211	1.06608	1.06113	1.0291	1.07455	1.02157	1.03535	1.0228
lipP	1.06856	1.00222	1.04856	1.04892	1.05281	1.05581	1.0351	1.06889	1.03047	1.02898	1.01828	1.071	1.05005	1.0621	1.052	1.03185	1.0305	1.04801	1.03844	1.05926	1.04186	1.01246	1.03103	1.04077	1.04314	1.04603	1.04605	1.02417	1.04816	1.08231	1.05574	1.0656	1.04627	1.04346	1.02907	1.00364	1.03105	1.03893	1.04005	1.02682
cgp_2095	1.05115	1.02687	1.04896	1.05396	1.07257	1.05345	1.05629	1.07343	1.05204	1.03971	1.02493	1.03967	1.06346	1.0483	1.05616	1.04757	1.04042	1.01573	1.03772	1.06077	1.02562	0.928202	1.02119	1.03054	1.06737	1.02668	1.04632	1.04012	1.03283	1.04854	1.04465	1.04643	1.0376	1.04071	1.02792	1.02664	1.02889	1.03763	1.03908	1.04307
cgp_1540	1.05378	1.01531	1.05286	1.06207	1.03495	1.07099	1.04383	1.04362	1.03932	1.01365	1.08111	1.02606	1.04766	1.0404	1.0108	1.02281	1.05687	1.03046	1.03279	1.03617	0.992736	1.02284	0.99381	1.02317	1.0638	1.0429	1.04862	1.06708	1.06323	1.04454	1.04665	1.03781	1.04039	1.04377	1.02581	1.04957	1.04656	1.02197	1.02097	1.0456
cgp_2213	1.05982	1.02779	1.06087	1.07037	1.03279	1.06838	1.05018	1.05211	1.02444	1.05521	1.04022	1.01043	1.0544	1.04476	1.01756	1.03502	1.04619	1.0426	1.01385	1.02427	1.01187	1.0065	0.998661	1.03309	1.01029	1.0515	1.03286	1.04383	1.04669	1.04722	1.04948	1.01744	1.03279	1.04349	1.00306	0.993724	1.04139	1.01834	1.01624	1.04343
pepC	1.07818	1.03435	1.04992	1.05698	1.05519	1.04664	1.0745	1.05618	1.05502	1.05228	1.04346	1.03984	1.06438	1.07252	1.06112	1.05922	1.03472	1.03453	1.04284	1.06517	1.05869	1.05016	1.00977	1.05702	1.04293	1.04069	1.07004	1.08066	1.04389	1.05476	1.05984	1.06145	1.04752	1.06	1.08094	1.08154	1.05791	1.05487	1.06437	1.04036
cgp_1694	1.05684	1.04342	1.0666	1.05239	1.03813	1.05782	1.03953	1.05074	1.04804	1.02942	1.03373	1.04484	1.05254	1.06958	1.05973	1.06849	1.06172	1.04047	1.03672	1.10081	1.03033	1.03091	1.01612	1.00816	1.048	1.01849	1.05904	1.06379	1.04431	1.04503	1.0463	1.07709	1.06054	1.03999	1.04645	1.06386	1.04472	1.0339	1.04672	1.03571
pctD	1.08943	1.05181	1.04531	1.04456	1.07228	1.05492	1.08232	1.06048	1.05577	1.01159	1.03062	1.07619	1.05815	1.07769	1.04471	1.07703	1.06422	1.04224	1.0459	1.06836	1.06324	1.01347	1.01696	1.00185	1.0257	1.05071	1.06184	1.06618	1.04631	1.05784	1.04698	1.04268	1.04461	1.06495	1.02871	1.08967	1.06479	1.04813	1.05178	1.025
arsC2	1.0372	1.057	1.03876	1.03495	1.05499	1.06477	1.07004	1.06632	1.04741	1.04381	0.980426	1.08247	1.07388	1.03807	1.04766	1.05143	1.04907	1.05665	1.05826	1.04787	1.04011	1.03512	1.03561	1.01484	1.06218	1.04224	1.05957	1.04971	1.02787	1.07523	1.07866	1.06165	1.05418	1.03073	1.05498	1.05175	1.05587	1.04235	1.053	1.02897
uriH	1.06763	1.00462	1.03334	1.02509	1.03913	1.05765	1.05301	1.06514	1.02086	1.01561	1.01892	1.08206	1.05101	1.04177	1.06692	1.04219	1.03613	1.0541	1.04871	1.06446	1.05866	1.03881	1.01359	1.00371	1.06618	1.035	1.06058	1.05303	1.01757	1.05122	1.07509	1.04922	1.09171	1.04786	1.05626	1.0588	1.04405	1.04056	1.0394	1.01804
cgp_1844	1.07148	1.02677	1.05261	1.04497	1.06546	1.0562	1.06291	1.05848	1.02534	1.01998	1.02364	1.07088	1.09026	1.06523	1.04859	1.06363	1.04776	1.05621	1.05992	1.05675	1.05462	1.06988	1.04957	1.02838	1.05485	1.03074	1.04308	1.04883	1.03875	1.04258	1.03496	1.02486	1.04063	1.048	1.04856	1.06358	1.0475	1.02952	1.03012	1.02587
cgp_1834	1.06966	1.0658	1.07423	1.07784	1.04986	1.04621	1.06059	1.06847	1.03188	1.0578	1.05301	1.0745	1.06401	1.04137	1.06702	1.07714	1.04167	1.04104	1.04907	1.05765	1.04946	1.04058	1.05945	1.02408	1.04013	1.05687	1.05833	1.06892	1.03304	1.05581	1.05811	1.06628	1.05502	1.07977	1.01573	1.06528	1.06761	1.04295	1.05617	1.04093
amt	1.06528	1.06028	1.07828	1.05494	1.05472	1.05033	1.05752	1.05188	1.0449	1.05144	1.03847	1.06386	1.06888	1.03532	1.05873	1.06567	1.03219	1.0727	1.04602	1.07176	1.03647	1.04561	1.02774	1.02786	1.05815	1.07095	1.05131	1.0794	1.04146	1.04315	1.06535	1.08089	1.0523	1.03505	1.05605	1.03944	1.05813	1.03551	1.05191	1.04718
ribG	1.03528	1.04821	1.05104	1.07268	1.03143	1.03964	1.03166	1.04037	1.06587	1.05525	1.05629	1.07132	1.05171	1.00836	1.03374	1.04765	1.05025	1.03409	1.04253	1.07083	1.05891	1.01495	1.03867	1.0242	1.05591	1.03287	1.05895	1.07164	1.05081	1.03227	1.06903	1.06765	1.0508	1.05501	1.03206	1.06444	1.08273	1.02425	1.03477	1.03438
argJ	1.03626	1.05986	1.05875	1.04266	1.04506	1.04662	1.04527	1.05408	1.05319	1.02525	1.045	1.06509	1.03791	1.02103	1.04519	1.04549	1.05253	1.04086	1.05893	1.05281	1.05863	1.0354	1.03634	1.01917	1.04315	1.03199	1.06163	1.06078	1.03803	1.06678	1.05969	1.06844	1.04677	1.04057	1.03008	1.03411	1.0824	1.04204	1.03482	1.05826
gluB	1.04927	1.04727	1.05239	1.00649	1.00617	1.04716	1.0281	1.06192	1.04313	1.00055	1.02803	1.06319	1.0762	1.04647	1.05981	1.07592	1.04984	1.0395	1.03084	1.07452	1.02675	1.00167	1.04152	1.03224	1.07748	1.04612	1.03055	1.05879	1.03226	1.04455	1.05028	1.05234	1.05863	1.07776	1.03014	1.06221	1.0416	1.05571	1.05059	1.04406
gluD	1.02946	1.03335	1.02284	1.0314	1.04304	1.04003	1.05957	1.03701	1.04705	1.02025	1.0227	1.03197	1.05877	1.08604	1.03504	1.04416	1.01341	1.03007	1.03618	1.04833	1.04945	1.03158	1.04673	1.03358	1.06267	1.05055	1.05943	1.0635	1.02947	1.04956	1.07088	1.06599	1.03319	1.07251	1.0406	1.04635	1.0464	1.03289	1.04143	1.02842
cgp_1642	1.05714	1.03809	1.07808	1.04648	1.05554	1.02074	1.01067	1.07893	1.05608	1.0568	1.03344	1.00456	1.06974	1.03635	1.09565	1.04754	1.01505	1.06349	1.03304	1.07702	1.02605	1.04883	1.03308	0.999908	1.02092	1.05091	1.0635	1.06763	1.02549	1.05885	1.07453	1.04913	1.04554	1.05258	1.06744	1.06996	1.01158	1.0329	1.05087	1.04959
cgp_1845	1.00386	1.02716	1.04784	1.0567	1.07149	1.07422	1.07869	1.06232	1.03273	1.03627	0.995973	1.00073	1.06895	1.06551	1.04658	1.05234	1.0385	1.01162	1.03	1.07401	1.0937	1.07731	1.00261	0.972432	1.07818	1.02677	1.03266	1.03838	1.02876	1.03207	1.02277	1.03858	1.04234	1.0453	1.05651	1.0968	1.0696	1.00452	1.03098	1.01541
cgp_1640	1.0322	1.02354	1.03947	1.05372	1.02741	1.04357	1.05496	1.04812	1.05222	1.01675	1.03672	1.03633	1.07345	1.04594	1.03961	1.04924	1.04129	1.05661	1.05208	1.04444	1.04912	1.02019	0.989995	1.01157	1.04455	1.0556	1.01866	1.03295	1.01628	1.04153	1.04599	1.02632	1.04313	1.03632	1.0456	1.04717	1.0282	0.900025	1.02403	1.04173
cgp_3405	1.04377	1.06785	1.01972	1.01062	1.05598	1.03339	1.01701	1.01599	1.0528	1.0479	1.0517	1.02036	1.01337	1.02491	1.05012	1.05017	1.0227	1.03002	1.03696	1.05476	1.02708	1.02251	1.06715	1.03901	1.03615	1.02615	1.02319	1.03337	1.02924	1.04634	1.05011	1.02121	1.02666	0.981665	1.05566	1.05768	1.02873	1.05224	1.03353	1.03759
cgp_3129	1.03273	1.07243	0.992905	1.03957	1.03389	1.04156	1.02275	1.02888	1.05586	1.01799	1.03203	1.0319	1.02578	1.04553	1.04589	1.00678	1.04433	1.03009	1.02166	1.03956	1.02167	1.01398	1.07413	1.03407	1.04698	1.06029	1.03644	1.00041	1.04192	0.99191	1.05458	1.03045	1.0433	1.03501	1.04264	1.04816	1.03441	1.03435	1.04847	1.03275
cgp_0311	1.0283	1.03689	1.03524	1.04165	1.03193	1.06003	1.0436	1.04305	1.01514	1.0218	1.04658	1.05206	1.04571	1.03137	1.05021	1.05028	1.0513	1.00833	1.069	1.02624	1.01556	1.00613	1.05565	1.04782	1.05524	1.03431	1.04775	1.01333	1.05301	1.01395	1.04577	1.03701	1.00385	1.01218	1.06028	1.08085	1.08319	1.03755	1.03387	1.04716
cgp_0793	1.02906	1.08843	1.06056	1.01286	1.02174	1.0534	1.04303	1.04616	1.03576	1.02743	1.06841	1.00577	1.05414	1.01233	1.03014	1.02321	1.00858	1.03966	1.04097	1.05921	1.0214	1.03502	1.04828	1.0061	1.03264	1.04889	1.04225	1.02416	0.986104	0.995328	1.05009	1.0687	1.01716	0.992835	1.07604	1.05514	1.07471	1.03806	1.02831	1.04709
ocd	1.02016	1.03675	1.0292	1.01818	1.02698	1.03371	1.06145	1.06058	1.04353	1.06392	1.02788	1.0149	1.04184	1.03008	1.02889	1.03929	1.02855	1.0364	1.01774	1.04175	1.02601	1.00163	1.05713	1.01141	1.02134	1.04951	1.04264	1.02137	1.01195	1.04904	1.05344	1.05954	1.02714	1.02008	1.08068	1.03916	1.07809	1.02437	1.03163	1.02124
cgp_1664	1.02605	1.05195	1.04449	1.0457	1.04195	1.05734	1.06655	1.05083	1.04416	1.00667	0.983435	1.01982	1.02497	1.01861	1.06317	1.045	1.05852	1.02599	1.0741	1.04759	1.03345	1.02592	1.03517	0.992846	1.08177	1.06521	1.0534	1.03168	1.02506	1.05671	1.01229	1.04226	1.02054	1.04662	1.05209	1.07657	1.02995	1.04302	1.0353	1.04385
cgp_0764	1.00539	1.03659	1.02225	1.02793	1.02173	1.05672	1.06622	1.04006	1.0421	1.03834	0.975608	1.00134	0.989749	1.02149	1.05097	1.0253	1.06209	1.05508	1.03783	1.0529	1.01809	0.988001	1.04004	1.03906	1.06763	1.02543	1.04745	1.04519	1.01104	1.04545	1.02989	1.04902	1.02439	1.03896	1.04658	1.0515	1.05894	1.03253	1.02994	1.0371
rnhB	0.983343	1.00779	1.02769	1.0172	1.01548	1.05496	1.0334	1.08312	1.04042	1.01805	1.02709	1.03236	1.01301	1.03419	1.03974	0.992626	1.04802	1.0303	1.04213	1.04004	1.06065	0.99912	1.05829	0.988132	1.03924	1.07242	1.05818	1.01643	1.04337	1.06352	1.05115	1.06658	1.02896	1.03553	1.0417	1.05799	1.05687	1.05476	0.998224	1.05178
uriT	1.07452	1.06619	1.05606	1.03752	1.05697	1.04882	1.05078	1.0294	1.0482	1.05903	1.04197	1.01652	1.0087	1.00951	1.0726	1.05941	1.03859	1.03809	1.07325	1.04044	1.06575	1.04464	1.03745	1.02461	1.07155	1.05903	1.04327	1.04593	1.04769	1.05336	1.05605	1.04089	1.05732	1.04438	1.04334	1.0703	1.04729	1.03157	1.04914	1.02516
cgp_1490	1.03604	1.03838	1.04078	1.05789	1.06513	1.05232	1.05396	1.04931	1.06563	1.07808	1.02512	1.0456	1.04834	1.00912	1.04022	1.06156	1.04121	1.05046	1.07941	1.01155	1.05662	1.04987	1.03847	1.04331	1.02762	1.0547	1.03303	1.04734	1.04212	1.03055	1.0589	1.07201	1.04989	1.02946	1.04517	1.03538	1.05407	1.02969	1.03217	1.03408
msrA	1.03856	1.06092	1.03993	1.02205	1.05891	1.03158	1.05406	1.03884	1.0814	1.02971	1.03635	1.05177	1.05615	1.00745	1.05095	1.06519	1.04787	1.05219	1.04989	1.03048	1.03599	1.04305	1.05018	1.05931	1.05099	1.05085	1.03206	1.06198	1.03566	1.06573	1.05326	1.06311	1.04593	1.04731	1.04364	1.08975	1.00593	1.02444	1.05251	1.06392
cgp_0159	1.0529	1.02047	1.03304	1.06078	1.07213	1.05644	1.03191	1.01877	1.07226	1.05015	1.05872	1.05006	1.06775	1.03113	1.04929	1.07937	1.02284	1.07076	1.04879	1.0277	1.05279	1.03108	1.10202	1.07407	1.03956	1.06426	1.05741	1.05777	1.03602	1.03562	1.04239	1.05687	0.987749	1.03415	1.04581	1.07988	1.04247	1.04488	1.0415	1.05385
cgp_2441	1.0382	0.988934	1.04425	1.04582	1.03604	1.05862	1.05101	1.028	1.0499	1.02123	1.0372	1.01046	1.06429	0.994384	1.02855	1.10392	1.04809	1.02779	1.0226	1.01692	1.0623	1.05045	1.04013	1.0215	1.08472	1.06969	1.00711	0.999509	1.00581	1.05754	1.07076	1.04819	1.04368	1.01723	1.04367	1.10488	1.01659	1.06058	1.05156	1.0319
cgp_0066	1.03077	1.03418	1.02993	1.05647	1.05187	1.04504	1.01885	1.07222	1.04315	1.03091	1.04535	1.07311	1.01153	1.04961	1.03998	1.05266	1.06154	1.06503	1.05556	1.00955	1.02265	1.01786	1.02697	1.04358	0.983211	1.03317	1.02518	1.02439	1.02976	1.04279	1.04138	1.01457	1.02656	1.04406	1.08191	1.02864	1.03084	1.05096	1.03023	1.05233
ureR	1.03068	1.04448	1.03832	1.05304	1.04353	1.04024	1.03014	1.05188	1.04144	1.02184	1.03374	0.998138	1.02316	1.05814	1.03696	1.0492	1.04345	1.04459	1.04423	0.994335	1.00609	1.00427	1.00361	1.067	1.02606	1.03232	1.03229	1.02313	1.02902	1.07528	1.02944	1.05601	1.03624	1.02694	1.08159	1.03412	1.06603	1.01346	1.04841	1.01076
lip1	1.04653	1.02378	1.033	1.039	1.09002	1.03145	1.03742	1.04329	1.04138	1.02843	1.04251	1.04036	1.04866	1.03783	1.04785	1.03461	1.04142	1.05276	1.03166	0.997634	0.993222	1.00463	1.01702	1.0468	1.06297	1.04134	1.00329	1.05176	1.03804	1.02914	1.05248	1.03006	1.02325	1.06176	1.06327	1.06248	1.0124	1.05823	1.05288	1.03199
cgp_0141	1.0205	1.05525	1.05873	1.05169	1.04062	1.07415	1.01407	1.07481	1.04193	1.05262	1.05019	1.01204	1.05618	1.06068	1.0251	1.02293	1.06393	1.08923	1.07281	0.998582	1.02983	1.01949	1.05123	1.08451	1.07002	1.04555	1.05619	1.04897	1.08049	1.0536	1.07529	1.06137	1.04356	1.03223	1.07755	1.07324	1.03133	1.06532	1.05635	1.07269
cgp_4003	1.01298	1.02262	1.06739	1.00903	1.0267	1.03649	0.999532	1.07714	0.997691	1.01596	1.008	0.987521	1.02806	1.05715	1.02288	1.05185	1.03096	1.01863	1.04216	0.97647	1.07499	1.01839	0.994211	1.06966	1.01976	1.05748	1.04735	1.03249	1.04929	1.01317	1.05135	1.04865	1.009	1.05186	1.01253	1.0444	1.07972	1.04826	1.04641	1.0706
cgp_1482	1.03281	1.04267	1.04767	1.03283	1.02273	1.06564	1.02498	1.06056	1.03457	0.998022	1.00778	1.04438	1.04493	1.03359	1.0427	1.04626	1.04038	1.02544	1.0369	1.03687	1.03677	1.02605	0.999093	1.03887	1.01223	1.03293	1.03586	1.02898	1.03204	1.0448	1.01967	1.05079	1.04609	1.04845	1.03251	1.03508	1.01781	1.02744	1.02976	1.02406
cgp_1589	1.02996	1.03043	1.04863	1.05115	1.0357	1.03498	1.04007	1.04793	1.02734	1.01758	1.0136	1.03786	1.03033	1.02672	1.03397	1.04509	1.04245	1.01297	1.03681	1.05451	1.02105	1.00926	1.01237	1.01361	1.01363	1.03069	1.02817	1.04493	1.03395	1.0382	1.02759	1.04661	1.0376	1.04581	1.02878	1.01798	1.02269	1.02129	1.02823	1.0171
cgp_1833	1.02727	1.04363	1.04959	1.04295	1.04043	1.0508	1.04769	1.05658	1.02845	1.00966	1.03628	1.04396	1.01852	1.03405	1.03415	1.03497	1.01607	1.02909	1.03346	1.04568	1.00876	1.02827	1.00235	1.03296	1.02575	1.01222	1.05784	1.03412	1.03074	1.06332	1.02569	1.03673	1.03832	1.04034	1.06143	1.03509	1.00761	1.02421	1.03785	1.02702
cgp_3091	1.01374	1.02643	1.04358	1.05197	1.03948	1.04319	1.0245	1.05611	1.03058	1.01194	1.04059	1.03445	1.03913	1.02791	1.00571	1.0499	1.05483	1.02346	1.03519	1.06566	1.01071	1.03206	1.01795	1.0314	0.984132	1.04782	1.05187	0.99489	1.03426	1.04571	1.03821	1.01535	1.03126	1.03854	1.04179	1.01049	1.00273	1.02058	1.02762	1.04328
cgp_1527	0.973681	1.02821	1.0457	1.02513	1.03442	1.05205	1.04252	1.02087	1.03701	1.00767	1.03843	1.0007	1.01534	1.0347	1.01011	1.04704	1.04518	1.01119	1.01336	1.0588	1.04712	1.02506	1.00348	1.01018	1.02538	1.01902	1.04239	1.01115	1.04671	1.03748	1.05392	1.04201	1.02567	1.02844	1.03257	1.00778	1.03648	1.01075	1.03673	1.01872
cgp_2349	1.00906	1.01651	1.03623	1.00901	1.03017	1.03725	1.06338	1.05067	1.02382	1.01682	1.02434	1.02119	1.02487	1.04982	1.01887	1.03493	1.0415	1.00167	1.02725	1.05024	1.03128	1.00729	0.991767	1.01478	1.02547	1.02528	1.01666	1.0186	1.0472	1.01022	1.04518	1.02913	1.02933	1.02724	1.04419	1.04022	1.04254	1.01278	1.01652	1.00696
cgp_1722	0.97209	1.01664	1.05348	1.05865	1.03367	1.07979	1.03399	1.06267	1.03042	1.01828	1.00514	1.02019	1.04614	1.03973	1.03184	1.01143	1.03644	1.0231	1.05567	1.05019	1.06662	1.02284	0.979343	1.0117	1.00316	1.04517	1.01629	1.0127	1.04699	1.04511	1.01188	0.995018	1.02455	1.05615	1.0246	1.01162	1.03392	1.01571	1.02452	1.02194
cgp_2431	0.959416	1.05155	1.03944	1.06449	1.03714	1.06651	1.04235	1.04564	1.02953	0.989463	1.03568	1.04672	1.01548	1.08208	1.0009	1.05376	1.05577	1.00675	0.992083	1.01353	1.01905	1.03917	1.03542	1.04576	1.03306	1.02052	1.01876	1.01819	1.0457	1.06599	1.03953	1.05411	1.023	1.03512	1.04405	1.03232	1.03548	1.0301	1.02021	1.02861
cgp_1074	0.986865	1.03432	1.03995	1.01531	1.01384	1.05323	1.06189	1.04998	1.03687	1.04442	1.02786	1.05525	1.02549	1.04702	1.00457	1.03089	1.03834	1.02731	1.00627	0.991854	1.01116	1.00202	0.99748	1.01887	1.00911	1.05272	1.01963	1.04441	1.02755	1.08056	0.994787	1.05571	1.03279	1.01079	1.03499	1.02275	1.01513	1.01439	1.022	1.02141
cgp_1647	0.99824	1.08194	1.05764	1.05878	1.06295	1.04062	1.05242	1.05309	1.05271	0.998922	1.05028	1.04336	1.04719	1.04194	1.04944	1.06398	1.03249	1.04875	1.05666	1.01446	1.00935	1.03158	1.02119	1.01677	1.05237	1.04511	1.07039	1.06083	1.04788	1.06696	1.07187	1.02282	1.03423	1.05327	1.04749	1.05868	1.01879	1.04605	1.03805	1.01434
cgp_1454	1.01656	1.04365	1.07373	1.06605	1.04044	1.0941	1.09788	1.05535	1.03367	0.981214	1.04749	1.0243	1.05179	1.04628	1.04242	1.04247	1.02183	1.05031	1.03197	1.04075	1.02621	1.00984	1.0253	1.04139	1.03547	1.02509	1.05101	1.04539	1.0381	1.076	1.05023	1.057	1.0535	1.03359	1.05274	1.03812	1.02167	1.0329	1.0465	1.04385
cgp_1304	0.976051	1.07802	1.05558	1.06811	1.051	1.0412	1.09536	1.09633	1.0309	1.00233	1.03534	0.971792	1.04774	1.03526	1.05167	1.05699	1.05199	1.02393	1.07537	1.02356	0.989162	0.977353	1.03382	1.00009	1.01435	1.0566	1.04219	1.04932	1.03468	1.06803	1.05646	1.04997	1.0315	1.03232	1.06517	1.02901	1.05567	1.00683	1.05826	1.04386
cgp_1230	1.05504	1.0433	1.01755	1.06035	1.02499	1.07934	1.03913	1.06037	1.03191	1.01681	1.10653	0.976886	1.08382	1.0224	1.02513	1.05751	1.0536	1.01067	1.03405	0.997913	1.04238	1.03369	0.99991	1.00235	1.05331	0.998142	1.02781	1.03008	1.02444	1.02312	1.01268	1.03718	1.04054	1.06202	1.05387	1.08474	1.02107	1.03096	1.02503	0.990448
cgp_1242	1.01994	1.06549	1.04252	1.07986	1.04823	1.01931	1.03196	1.01824	1.0207	1.0448	1.06221	0.987913	1.10047	1.0652	1.01005	1.06029	1.04296	1.04616	1.05815	1.02275	1.03568	0.985069	1.00273	0.985367	1.05833	1.03822	1.02944	1.01967	1.01922	1.04838	1.05077	1.01131	1.04042	1.057	0.992722	0.9889	0.979988	1.0373	1.00437	1.01164
fepC	1.05597	1.01551	1.09317	1.01984	1.06411	1.02123	1.0437	1.04757	1.03025	0.985761	1.04185	0.982768	1.03566	1.0596	1.07526	1.02353	1.0293	1.03564	1.06767	1.01174	1.06866	1.02832	1.02941	1.02531	1.00075	1.07175	0.994352	1.01332	1.00305	1.07917	1.03868	1.08411	0.983687	1.03114	0.972165	1.05335	1.00725	1.06835	1.03112	1.00198
cgp_0126	1.06029	1.00911	0.995623	0.992579	1.01059	1.04477	1.04507	1.05285	1.05516	1.02908	1.04464	1.00996	1.04773	1.0562	1.03319	1.00954	1.05821	1.05104	1.05223	1.05985	1.00742	1.02881	1.03436	1.04428	0.989705	1.04425	0.996548	1.0399	1.03226	1.0152	1.01986	1.05725	0.992834	1.00267	1.04873	1.01559	1.02788	1.04321	1.05003	1.04702
cgp_2601	1.06877	1.00083	0.999481	1.00564	1.04008	1.04732	1.01328	1.0471	0.985063	0.997147	1.01868	1.00156	1.02636	1.0177	1.02876	1.01774	1.03882	1.01578	1.02756	1.05369	1.00809	0.997456	1.02584	1.04282	1.05135	1.03185	1.01915	1.04148	1.02301	0.999044	1.00921	1.04329	1.02179	1.01306	1.00277	1.03092	0.981237	1.02961	1.04633	1.03
cgp_0075	1.07808	1.03949	1.0163	0.974449	1.02902	1.02996	0.982042	1.05804	1.01279	0.996721	1.03929	1.0413	1.05456	1.06546	1.04986	1.02995	1.02334	1.04746	1.06988	1.03771	1.04127	1.0337	1.07951	1.05906	0.989752	1.03125	1.03933	1.03208	1.04006	1.00508	1.03337	1.0551	1.05243	1.02627	1.01888	1.04092	1.00683	1.08287	1.05434	1.06127
ptsG	1.06404	1.05145	1.03575	0.97289	0.984272	1.03222	0.986721	1.04192	1.01054	1.0189	1.03326	1.03123	1.04674	0.985979	1.04281	1.05839	1.04785	1.02818	1.04623	1.05523	1.05773	1.05412	1.00405	1.00571	1.0504	1.04899	1.05279	1.07449	1.03972	1.041	1.02365	1.01662	1.04521	1.07043	1.03603	1.05566	1.04908	1.01115	1.02819	1.03796
ung	1.04966	1.03784	1.0401	1.02258	0.975575	0.989453	1.04111	1.04778	0.991639	0.998798	1.06417	1.00861	1.05017	1.00373	1.03092	1.03284	1.06265	1.02876	1.03597	1.05087	1.03462	1.028	1.0178	0.999408	1.02446	1.03364	1.03397	1.02051	1.04596	1.05935	1.02595	1.0315	1.0443	1.03864	1.01098	1.03018	0.960093	1.00083	1.01694	1.04052
hisN	1.02474	0.983225	1.0497	1.03466	1.04586	1.03803	1.06074	1.04145	1.05144	1.00152	0.973471	1.12822	1.05879	1.03555	1.00967	1.04372	1.02141	1.02171	1.02305	1.04716	1.03293	1.04564	1.02493	0.998016	1.00191	1.04455	1.02906	1.01147	1.04041	1.01946	1.01124	1.03178	1.04748	1.06597	1.02384	1.026	1.00193	1.0277	1.01663	0.997012
cgp_3410	0.992756	0.992352	1.03421	1.05146	1.01415	1.0211	1.01106	1.04242	1.02084	0.957916	1.01308	1.07387	1.04501	1.01195	1.01829	1.00495	1.02848	1.0421	1.04164	1.04943	1.03143	1.07251	1.05658	1.03349	1.00567	1.04318	1.01685	1.00086	1.0106	1.06427	1.02662	1.0206	1.0533	1.04159	1.0221	1.07243	0.999566	1.01897	1.00981	0.993992
cgp_0317	1.05892	0.966934	1.06212	1.03946	1.03448	1.00581	1.029	1.00744	1.03365	0.996008	0.986311	1.05725	1.0164	1.04913	1.05622	1.0067	1.0164	1.02119	1.04327	1.06418	1.02813	1.02427	1.04888	1.0534	0.969996	1.07566	1.03019	1.00251	1.03202	1.01856	1.04589	1.02544	1.06446	1.0608	1.03322	1.05306	0.997546	1.00955	1.03301	1.01175
cgp_2326	1.02085	1.01837	1.05957	1.05338	1.04405	1.04829	1.01794	1.05498	1.05272	0.998089	0.988351	1.03761	1.06036	1.01926	1.04066	1.04071	1.07044	1.03019	1.04242	1.03648	1.03456	1.02402	0.999808	1.0343	1.03373	1.05942	1.06025	1.00183	1.06145	1.03488	1.03918	1.04637	1.0503	1.07682	1.04689	1.08499	0.9546	1.04859	1.06494	1.02762
cgp_1312	1.0264	1.03051	1.03575	1.0158	1.04825	1.06012	1.04714	1.02604	1.03038	1.00997	1.05345	0.976588	1.03823	1.04124	1.03641	1.06947	1.05194	1.04128	1.05212	1.04049	1.08598	1.0355	1.06818	1.03464	1.04374	1.02811	1.03151	1.05143	1.04991	1.0425	1.06594	1.01563	1.01354	1.05197	1.05531	0.996345	1.01573	1.04351	1.05481	1.02862
cgp_0077	1.02088	1.03219	1.05165	1.02764	1.03816	1.04876	1.05584	1.03475	1.05802	1.00189	1.06099	0.997894	1.00094	1.01098	1.01644	1.05351	1.05863	1.04879	1.07231	0.992971	1.02054	1.01607	1.06215	1.05811	1.02217	1.05709	1.04993	1.04474	1.05861	1.06113	1.0317	1.04763	1.02752	1.03597	1.00987	1.0401	1.0199	1.04994	1.03166	1.04321
cgp_3401	0.998979	1.0118	1.06398	1.04208	1.04346	1.07474	1.01669	1.05046	1.04499	0.994955	1.07221	0.962679	1.03643	0.979061	1.03849	1.01829	1.07926	1.04083	1.0596	0.998127	1.02012	1.03946	1.04357	1.02784	1.05402	1.07898	1.06802	1.03191	0.999262	0.999205	1.06129	1.0462	1.02629	1.02466	1.03761	1.00341	1.02501	1.04567	1.02408	0.995411
cgp_2072	0.992747	1.07406	1.05642	1.04422	1.06571	1.05083	1.01435	1.03181	1.03411	1.02805	1.05493	1.05356	1.07051	0.985943	1.06615	1.0527	1.0174	1.08285	1.04915	0.994589	1.01497	1.02029	1.0523	1.00256	0.998823	1.10252	1.0518	1.08429	1.05411	1.01084	1.05647	0.981359	1.02069	1.03959	1.02142	0.992253	0.985486	1.04005	1.02622	1.02318
cgp_2096	1.01712	1.04916	1.01816	1.03136	1.06584	1.05425	1.05645	1.03724	1.05252	1.04886	0.964441	0.958776	1.03345	0.99357	1.03809	1.02869	1.05367	1.12092	1.14024	1.03048	1.00756	1.00135	0.979296	1.01387	0.996173	1.0622	1.02816	1.055	1.05414	1.05666	1.03186	1.0342	1.02898	1.02605	1.02983	1.03253	1.00534	1.01053	1.02153	1.01593
ureG	1.02277	1.06088	1.05683	1.01781	1.00548	1.04995	1.0212	1.02104	1.05807	1.02378	1.0358	1.08654	1.00898	0.981564	1.03159	1.06192	1.00708	1.0365	1.05038	1.02241	1.01913	1.01375	1.05142	1.05562	1.00737	1.04251	1.02194	1.03619	1.02427	1.06123	1.03501	1.05789	1.04392	1.0067	1.0224	1.01967	1.09572	1.0477	1.04667	1.05226
ureE	1.05868	1.06851	1.0417	1.00066	1.02864	1.01017	1.05621	1.05157	1.05777	1.04855	1.03121	1.04864	1.01697	0.9794	1.04072	1.00817	1.04239	1.04042	1.01488	1.00406	1.00911	1.04214	1.04978	1.06308	0.989436	1.0476	1.01831	1.05848	1.02456	1.03304	1.02674	1.02708	1.03556	1.02298	1.03287	0.99984	1.07439	1.04684	1.02999	1.04263
cgp_2991	1.07725	1.01158	1.05042	1.03467	1.041	1.03501	1.0348	1.03805	1.02063	1.02239	1.06188	1.0814	1.03196	1.00591	1.05221	1.00581	1.03336	1.06087	1.03592	1.03379	1.02316	1.02969	1.06118	1.03464	1.0253	1.03282	1.05691	1.03235	1.03071	1.05736	1.04644	1.04729	1.08291	1.06255	1.1005	1.00408	1.09115	1.05532	1.05117	1.04875
cgp_1579	1.09318	1.08568	1.02146	1.03081	1.03496	1.05504	1.03973	1.04315	1.01084	0.997802	1.02854	1.11595	1.06993	0.944754	1.02351	1.034	1.00806	1.05858	1.06383	1.00517	0.992637	1.04138	1.07947	1.03002	1.01903	1.06377	1.05498	1.0046	1.0503	1.01708	1.02509	1.05587	1.06358	1.05403	0.972045	0.998408	1.10984	1.06389	1.04322	1.03583
ribD	1.05008	1.00391	1.06003	0.996775	1.01211	1.03465	1.04464	1.05455	0.993349	1.00829	1.01634	1.05841	0.974479	1.02985	1.05652	1.03573	0.981763	0.983391	0.982403	1.07096	1.04952	1.03608	1.02119	1.04763	1.06615	1.02526	1.06154	1.02004	1.02754	1.03793	1.05563	1.04102	1.04354	1.03277	1.02588	0.945328	1.06893	1.03062	1.0175	1.0273
dnaQ2	1.05915	0.990915	1.02973	0.999236	0.986189	1.01541	1.03915	0.999641	0.981416	0.979581	1.02211	1.08667	0.982015	1.04239	1.02558	1.03382	1.01709	0.990889	0.984943	1.06294	1.02782	1.00129	0.993538	1.02226	1.02219	1.00038	1.01287	1.02628	1.05161	1.04025	0.982516	1.04436	1.02701	1.02205	1.01113	1.04489	1.03638	1.02117	1.01019	1.03962
cgp_3279	0.995699	1.01068	1.03407	1.04534	1.04168	0.976318	1.04952	1.0292	1.02838	0.998649	1.06797	1.12618	1.01442	1.03723	1.06667	1.04443	0.98331	1.02791	1.03159	1.05854	1.06174	1.0378	1.02627	1.07728	1.06093	1.00255	1.02802	1.01951	1.0891	1.03712	1.02873	1.0342	1.03109	1.01172	1.0399	1.07357	1.07285	1.06433	1.06512	1.00398
cgp_3288	1.0047	1.00927	1.09386	1.09861	1.04152	1.0036	0.973269	1.01646	0.991117	0.954931	1.07156	1.10071	1.05226	1.00973	1.04992	1.02184	1.02212	0.994973	1.04191	1.07846	0.995652	0.999303	1.02113	1.07797	1.05698	1.01965	0.989549	0.955464	1.01733	1.07385	1.0298	1.02995	1.07933	1.06799	1.05242	0.997716	1.03233	1.05316	1.0272	1.04576
cgp_3033	1.04335	1.10528	1.05704	1.04098	1.01124	1.07955	1.02209	1.05258	0.992531	0.999301	1.10245	1.05468	0.987671	1.05073	1.07808	1.00577	1.05221	1.05296	1.05077	1.03976	1.03264	1.03789	1.06472	0.999322	1.0043	1.01713	1.04549	1.06664	1.02524	1.0816	0.999179	1.04696	1.05209	1.00785	1.03123	1.01269	1.09792	1.01837	1.02194	1.00648
cgp_2132	1.06226	1.05684	1.0116	0.966804	1.02209	1.02111	0.99046	1.00671	1.01902	0.993167	1.15129	1.0387	1.02308	1.04698	1.04359	1.03661	1.03361	1.02948	1.03848	1.08271	1.06022	1.08692	1.01073	0.979206	1.02861	1.02043	1.02157	1.00516	1.01923	1.05067	1.00868	0.961549	1.02956	1.04005	1.02258	1.01734	1.07244	1.07275	1.0362	1.02597
cgp_1727	1.03888	1.0751	1.02865	0.951235	0.996482	1.04799	0.971274	1.02346	1.02478	0.980065	1.0462	1.05039	1.02065	1.07498	1.08444	1.05123	1.07377	1.05172	1.08594	1.06058	1.03412	1.0531	1.04234	1.03377	1.08355	1.04919	1.07803	1.0908	1.05941	1.06937	1.06715	1.02827	1.0874	1.06056	1.07118	1.08399	1.08759	1.0722	1.0514	1.05689
purQ	1.03793	1.03645	1.04722	1.05479	1.07664	1.04528	1.07207	1.04406	1.04724	1.08016	1.06086	1.04386	1.13249	1.03591	1.04359	1.06515	1.05334	1.06589	1.08021	1.01895	1.10847	1.14671	1.0187	1.01576	1.02794	1.0206	1.05039	1.027	1.04014	1.04346	1.02354	1.03052	1.03618	1.03401	1.03992	1.04695	1.03158	1.04388	1.02979	1.02049
purL	1.03423	1.0235	1.02995	1.04553	1.06711	1.03935	1.05431	1.0305	1.0339	1.05468	1.03159	1.01975	1.09896	1.02496	1.02975	1.05155	1.04371	1.05637	1.06857	1.04097	1.09957	1.1279	1.03133	1.01688	1.02112	1.00617	1.01581	1.01827	1.02845	1.02859	1.01493	1.0057	1.02035	1.02351	1.02946	1.06103	1.01931	1.03611	1.02873	1.01702
purD	1.06618	1.03485	1.06283	1.04711	1.05531	1.06537	1.07653	1.0456	1.05552	1.05338	1.03278	1.06879	1.10349	0.99391	1.05214	1.06567	1.04933	1.07031	1.08999	1.05444	1.08778	1.09829	1.06051	1.04383	1.03783	1.05141	1.03635	1.03385	1.02485	1.06073	1.00022	0.994948	1.03591	1.04283	1.05153	1.07814	1.03863	1.05197	1.04967	1.03508
gltX	1.02327	1.04389	1.0339	1.02108	1.06465	1.04458	1.03345	1.04918	1.0491	1.05271	1.07938	1.06328	1.0831	1.03565	1.04602	1.04649	1.07139	1.03052	1.06613	1.052	1.04585	1.05722	1.04917	1.05865	1.06216	1.03043	1.01366	1.00071	1.05312	1.0407	1.00789	0.994449	1.04986	1.02793	1.02171	1.0466	1.01688	1.02487	1.04772	1.04819
cgp_1794	1.02588	1.04584	1.04198	1.01017	1.0749	1.04901	1.08598	1.04559	1.02315	1.0074	1.04973	1.05409	0.998561	1.08232	1.02718	1.06781	1.09579	1.07786	1.04624	1.00597	1.09443	1.11771	1.03913	1.0543	1.05903	1.05583	1.03848	1.04344	1.05765	1.0627	1.01367	0.996182	1.04429	1.04417	1.00443	0.98871	1.03501	1.05736	1.02559	1.01723
cgp_1383	1.07918	1.04108	1.03476	1.02729	1.00834	1.06295	1.06337	1.03641	1.0477	1.08554	1.01132	1.08414	1.04911	1.0856	1.02467	1.03907	1.03637	1.00186	1.03798	1.07281	1.10505	1.16603	1.03283	1.01958	1.05772	1.07697	1.04702	1.04325	1.03153	1.05267	1.02355	1.07171	1.03856	1.03733	1.05924	1.04872	1.03857	1.02306	1.00562	1.00637
cgp_2107	1.03793	1.03659	1.05397	1.07144	1.04322	1.0618	1.06494	1.05355	1.02686	1.04664	1.02043	1.03025	1.06631	1.11263	1.05805	1.03428	1.04787	1.06864	1.0384	1.04968	1.05764	1.11156	1.0345	1.01986	1.0403	1.03025	0.953648	0.947011	1.02686	1.04685	1.03042	1.05059	1.03175	1.05245	1.0554	1.04283	1.0142	1.01043	1.02954	1.01904
cgp_2153	1.0852	1.02818	1.0731	1.06968	1.00853	1.03098	1.08434	1.06891	1.039	0.973755	1.0192	1.01162	1.06142	1.05432	1.03612	1.07382	1.01888	1.02361	1.03416	1.07072	1.04004	1.05566	1.0256	1.01046	1.02366	1.01594	1.05759	1.03654	1.01275	1.03502	1.03364	1.05082	1.05632	1.03855	1.06232	1.01162	1.06564	1.03039	1.05938	1.02082
cgp_0918	1.04559	1.05711	1.02445	1.04795	1.00913	1.05688	1.05492	1.04994	1.0357	0.975508	1.04326	0.980631	1.06053	1.04498	1.06614	1.05232	1.04308	1.02777	1.06302	1.04946	1.02868	1.00974	1.00796	1.02844	1.0715	1.02963	1.00227	1.04164	1.02754	1.02724	1.05673	1.05539	1.07989	1.03581	1.03535	1.02162	1.06691	1.03903	1.01534	1.02046
cgp_1758	1.09055	1.06288	1.06316	1.07043	1.05701	1.06991	1.08124	1.06015	1.02269	0.981021	1.00249	1.067	1.00974	0.996028	1.06951	1.05906	1.05465	1.05424	1.02527	1.06082	1.03925	1.03922	1.03162	1.05083	1.09302	1.02668	1.04815	1.05938	1.06146	1.05704	1.07164	1.05241	1.08678	1.04901	1.05751	0.974652	1.03943	1.04646	1.05738	1.01947
cgp_3300	1.04892	1.08037	1.04939	1.03472	1.02877	1.05626	1.05598	1.04362	1.07362	1.00225	1.02326	0.993854	1.03759	1.08283	0.983901	1.03695	1.07138	1.0608	1.07401	1.07759	1.09394	1.09252	1.02258	1.00907	1.07662	1.0453	1.072	1.06623	1.02551	1.01393	1.07963	1.07904	1.08977	1.01427	1.06746	0.948072	0.991355	1.04409	1.07713	1.07326
cgp_1478	1.01885	0.99923	1.0898	1.07731	1.0275	1.04948	1.03842	1.00874	1.04465	1.03412	1.01853	1.11417	1.06253	1.03482	1.07612	1.04478	1.0892	1.04597	1.05924	1.06827	1.02687	1.02124	1.00677	0.996934	1.08908	1.05675	0.996688	1.03538	0.999343	1.01981	1.01474	1.04732	1.03449	1.04965	1.00149	0.997345	0.989795	1.05823	1.03212	1.03995
cgp_2582	1.01773	1.00037	1.03813	1.06283	1.03182	1.03465	1.07792	1.0297	1.02296	1.03682	1.0624	1.06795	1.04816	1.0424	1.02732	1.07334	1.06135	1.0493	1.06479	0.989412	1.05148	1.05021	0.97258	0.986697	1.06532	1.05824	1.01862	1.04431	1.05085	1.02715	1.03838	0.994565	1.01923	0.991259	1.04361	1.04727	0.979648	1.03292	1.04667	1.01991
cgp_1745	1.07277	0.993631	1.09099	1.07428	1.02269	1.08262	1.07311	1.09762	1.07349	1.04793	1.0827	1.05055	1.06433	1.06295	1.08302	1.01892	1.07009	1.01315	1.06046	1.08814	0.965805	1.06496	0.974651	1.00794	1.06476	1.06807	1.02536	1.08997	1.04199	1.081	1.0354	1.01746	1.05364	1.07148	1.07684	1.05117	0.987328	1.00366	1.03052	1.00589
cgp_4011	1.03738	1.05792	1.10589	1.10803	1.02477	1.09171	1.03208	1.00223	1.06435	1.00371	0.980285	1.03369	1.05919	1.10679	1.00305	1.08692	1.03043	1.06387	1.06005	1.0886	1.01782	0.992613	0.996509	1.02692	1.08255	1.06889	1.035	1.03577	1.0514	1.04523	1.02821	0.993725	1.03824	1.02849	1.09683	1.04635	1.0089	1.01861	1.00804	1.04217
cgp_1714	1.00367	1.04322	1.06187	1.01654	1.05872	1.02337	1.04575	1.09282	1.06107	0.984503	0.988954	1.03374	1.0057	1.05376	1.07414	1.07462	1.0686	1.03737	1.03183	0.977876	1.08186	1.01572	1.04994	0.97192	1.06557	1.08777	1.06624	1.04851	1.0446	1.0777	1.06893	1.04259	1.05644	1.06424	1.06938	1.05087	1.12118	1.04322	1.00708	1.04018
cgp_1728	1.04352	1.06958	1.02585	1.054	1.0403	1.05345	1.06069	1.04536	0.972648	0.964782	0.941988	1.06218	1.02052	0.990673	1.06987	1.04146	1.07653	1.05542	1.04575	1.02058	1.07416	1.02263	1.05634	0.951693	1.07536	1.02625	1.07462	1.01649	1.09312	1.11044	1.0503	1.04764	1.07488	1.03873	1.08543	1.06609	1.08014	1.05832	1.03411	1.05591
cgp_1466	1.05543	1.04558	1.07014	1.04011	1.07653	1.05274	1.0597	1.07132	1.00907	1.01345	1.00649	1.00556	1.0727	1.06449	1.06291	1.02078	1.04801	0.980065	0.941148	1.10381	1.05372	1.05316	1.01521	1.06812	1.07632	1.00943	1.06217	1.03447	1.06638	1.08603	0.9909	0.902062	1.10128	1.06819	1.05209	1.04985	1.07352	1.00872	1.0319	1.01542
cgp_1091	1.0579	1.04161	1.03373	1.06858	1.02841	1.04286	1.04817	1.08444	1.06086	1.04437	0.987422	1.03281	1.06452	1.07869	1.05506	1.04737	0.99231	1.08565	1.06152	1.05038	1.06835	1.04565	1.04024	1.0472	1.10711	0.923891	1.05876	1.04005	0.962704	1.09692	1.03218	1.03748	0.991546	1.04566	1.10629	1.06995	1.11342	1.05197	1.09154	1.07985
cgp_0031	1.04421	1.09559	1.03432	1.02464	0.997273	1.0141	1.02795	1.10611	1.0441	1.05312	1.0731	1.01932	1.06116	1.09814	1.02061	1.077	1.02845	1.04418	1.02208	1.03846	1.04213	1.06388	0.971065	1.09092	1.06564	1.05726	1.04455	1.02493	1.0453	1.0757	1.06266	1.02812	1.01066	1.00102	1.06539	1.12632	1.06845	1.06493	1.04064	1.07294
cgp_0416	0.996168	1.00665	1.02738	1.06022	0.995291	1.05097	1.07762	1.03632	0.995062	0.919801	1.00443	0.995023	0.940887	1.11237	1.00794	1.02498	1.06931	1.02045	1.02633	1.01649	0.989343	1.00252	1.03781	1.05466	1.02445	0.993285	1.01501	1.02619	1.01926	1.01779	1.02297	1.02962	1.01517	1.00561	1.033	1.02712	1.0189	1.0146	1.01925	1.04125
cgp_0414	0.997349	1.02464	1.02406	1.0508	0.997405	1.03454	1.04862	1.01368	0.966673	0.914837	0.986255	1.05775	0.985947	1.10195	1.01178	1.04571	1.05345	1.02488	1.02618	0.996363	1.00878	0.996458	1.03868	1.05275	0.996362	0.998049	1.014	1.02262	0.996474	1.00987	1.0209	1.03436	1.00692	0.984217	1.01396	1.03646	1.01917	1.03583	1.03322	1.04226
ptpA2	0.940967	1.02408	1.02672	1.06298	1.03612	1.07229	1.06553	1.04134	0.973782	0.940759	1.00865	1.03939	0.968976	1.04754	1.0214	1.05275	1.08384	1.02074	1.02101	0.962177	1.02327	1.00864	1.01235	1.04587	1.03246	1.04537	1.03171	0.972125	1.05884	1.03682	1.0494	1.04907	0.99779	1.02855	1.00573	1.04647	1.00489	1.0094	1.02186	1.07744
cgp_0962	0.994705	1.06439	1.0571	1.04509	1.00271	1.06045	1.06032	1.05918	1.01679	0.994842	0.955335	1.01866	1.01942	1.05973	1.03334	1.03803	1.01996	1.04167	1.04333	1.09232	1.03171	0.99934	1.07508	1.0898	0.938139	1.04454	1.06395	1.04787	1.03884	1.06517	1.06808	1.05876	1.00313	0.983461	1.04299	1.05738	1.03893	1.05972	1.05523	1.08153
cgp_2806	1.00603	1.09681	0.99938	1.04847	0.993875	0.995428	1.07811	1.01519	1.02328	0.960721	1.06205	0.971543	1.02788	1.06526	1.00575	1.00073	0.995017	1.10879	1.01747	0.974114	1.07092	1.04169	1.12349	1.03496	0.989941	1.0836	1.07795	1.05646	1.04599	1.01831	0.990967	1.01797	0.990145	0.997883	1.01167	1.03454	1.05221	1.0756	1.05509	1.04441
cgp_1148	0.930324	1.08525	1.07897	1.06087	1.03139	1.05487	1.06267	1.12704	1.05122	1.02935	1.02511	0.966147	0.96663	1.04496	1.04447	1.05121	1.05843	1.07465	1.03963	0.983225	0.956365	1.05134	1.05988	1.02446	1.05359	1.03589	1.08175	0.991776	1.06453	1.04749	1.0663	1.01607	1.00429	1.05679	1.00879	1.03789	1.10926	1.02018	1.0129	1.0343
cgp_2353	0.895401	1.07249	1.03421	1.04622	1.04127	1.07417	1.03071	1.03669	1.0567	0.997425	0.992827	0.969695	0.986444	1.08517	1.06208	1.07172	1.07586	1.04119	1.07244	1.01973	1.00449	1.06316	0.994763	1.03602	0.929246	1.06382	1.08709	1.05463	1.05853	1.06778	0.995088	1.08805	0.981386	1.02292	1.05381	1.04094	1.11574	1.00335	1.05763	1.0411
cgp_0606	0.908765	1.11125	0.994202	1.02447	1.02625	1.04452	0.97425	1.0297	1.04759	0.973949	1.04003	0.944573	1.0786	0.973446	1.01235	1.07515	1.05944	1.01616	1.05139	0.97918	1.01325	1.04314	1.05495	1.05901	1.06734	1.05443	1.01872	1.05523	1.05979	1.06442	1.01515	1.0374	1.01821	1.03803	0.968465	1.01094	1.11475	1.04435	1.07619	1.01987
cgp_3111	1.04569	1.05715	1.05951	1.00695	1.01497	1.02899	1.04561	1.0239	0.961057	1.0625	0.974031	0.911071	1.04226	1.05462	1.06598	1.02299	1.1049	0.998774	0.967115	1.04677	1.08035	0.94308	1.04066	1.04459	0.985053	1.00185	1.00493	0.999643	1.06648	1.04296	1.01709	1.03415	1.05298	1.08826	0.907635	1.00645	1.0215	1.03295	1.03811	1.06253
cgp_2957	0.987287	1.04173	1.00228	1.02355	0.954439	1.08799	1.02434	1.04412	1.00019	0.981105	1.00205	0.958804	0.998783	1.01936	1.0341	1.04954	1.09034	1.02346	1.03549	1.02722	0.954365	0.999954	1.04972	1.05194	0.912813	1.03774	1.0189	0.90242	1.02698	1.01958	1.05452	0.999107	1.0439	1.04491	1.01771	0.929446	0.983492	0.957224	1.02289	1.04672
ilvN	1.0407	1.07342	1.01813	0.961834	1.00098	1.0676	1.05862	1.04055	0.993438	0.931458	0.990769	1.06874	1.10273	1.10624	1.06914	1.07126	1.06313	1.04997	1.04188	1.07289	1.00817	1.00028	1.00001	1.0155	1.0647	1.03118	1.06636	1.03447	1.04516	1.05386	1.09606	1.10218	1.05038	1.06729	1.08218	1.06462	1.0431	1.0383	1.03215	1.05381
ilvB	1.05538	1.03322	1.01952	0.925116	0.972872	1.037	1.04297	1.02608	0.94607	0.902626	0.978913	1.05888	1.06669	1.10807	1.05665	1.06724	1.0416	1.03691	1.02778	1.04937	0.954404	0.922361	1.01952	0.981872	1.0453	1.04674	1.04181	1.04223	1.03402	1.04624	1.07419	1.10833	1.03758	1.03998	1.04068	1.05015	1.03474	1.0401	1.03651	1.02952
cgp_0757	1.02488	0.981663	1.06094	0.963613	0.991644	1.02799	0.945607	1.06444	1.01114	0.924985	1.01474	0.909427	0.971438	1.03997	1.02485	0.994584	1.01504	1.03444	1.04468	1.02185	0.963802	0.962527	1.0847	0.96716	1.08116	1.03543	1.01483	1.06788	1.01583	1.03906	1.07809	1.03897	1.06086	0.976585	1.05518	1.03039	1.15284	1.01145	1.01883	1.02096
cgp_1281	1.03255	1.01637	1.02441	1.02862	1.02049	1.02363	1.02881	1.02333	1.02611	0.996747	1.02691	1.02129	1.02432	1.00688	1.01914	1.03591	1.01953	1.02594	1.02347	1.02684	1.02047	1.00819	1.01546	1.01618	1.01895	1.01099	1.02723	1.02362	1.01858	1.00448	1.02825	1.03206	1.01709	1.01356	1.02309	1.03228	1.01202	1.01285	1.02204	1.01174
cgp_2181	1.04338	1.00773	1.01854	1.02325	1.017	1.02983	1.02608	1.00566	1.00844	1.01352	1.01538	1.02736	1.03211	1.01271	1.0279	1.02452	1.0266	1.02087	1.02559	1.0283	1.00777	0.999471	1.01334	1.02019	1.02391	1.00426	1.01815	1.02577	1.02935	1.00791	1.0312	1.018	1.01773	1.0321	1.02727	1.03353	1.01871	0.994749	1.01573	0.999606
hrpB	1.02222	1.00086	1.02837	1.01178	1.01135	1.01904	1.02488	1.01885	1.02431	1.02326	1.02784	1.02456	1.01543	1.02491	1.01021	1.022	1.02365	1.02262	1.02342	1.01425	1.00166	0.981765	1.00558	1.02145	1.00506	1.01534	1.01303	1.02492	1.02908	1.01861	1.02123	1.01545	1.02516	1.01941	1.01949	1.02883	1.02313	1.00813	1.02449	1.01425
cgp_1082	1.01391	1.01769	1.0062	0.999718	1.01456	1.04169	1.02973	1.0117	1.01743	1.00923	1.01946	1.01216	1.01969	1.01033	1.01153	1.01586	1.01804	1.00863	1.01005	1.04233	1.0078	0.9981	1.00802	1.02275	1.02448	1.00054	1.01263	1.01275	1.00886	1.01831	1.01565	1.02665	1.01072	1.0259	1.03229	1.02633	1.02945	1.02015	1.02441	1.01985
hisD	1.03541	1.00977	1.01946	1.01522	1.02872	1.02274	1.02973	1.02008	1.03338	0.988438	1.01983	1.03582	1.02034	1.02638	1.03267	1.03756	1.02867	1.02516	1.03091	1.00757	1.00658	1.01749	1.01061	1.03135	1.02135	1.02082	1.03072	1.01668	1.02604	1.0209	1.03486	1.03425	1.02281	1.01103	1.04558	1.0328	1.03213	1.02689	1.02281	1.01771
cgp_3394	1.03418	1.00899	1.01712	1.02875	1.01826	1.00843	1.0159	1.02748	1.0138	1.01341	1.01507	1.02425	0.99507	1.01607	1.03681	1.02359	1.01756	1.0163	1.01253	1.03107	1.03623	1.01476	1.00681	1.03907	1.0042	1.02946	1.02164	1.01865	1.02632	1.02482	1.03074	1.02243	1.02371	1.02397	1.03241	1.02704	1.03251	1.02203	1.02711	1.02063
cgp_2187	1.03214	0.994865	1.00722	1.0209	1.01952	1.02272	1.02724	0.998426	1.02241	0.993815	1.01867	1.0254	0.991525	1.02794	1.0137	1.03776	1.0028	1.00504	1.03598	1.00362	1.02594	0.997231	1.00509	1.02046	1.04272	1.01821	0.994639	1.00802	1.04554	1.00959	1.02058	1.02604	1.02935	0.997959	1.04315	1.03181	1.02633	1.00682	1.01342	0.994757
iolB	1.02763	1.01877	1.01513	1.02161	1.01646	1.01262	1.01851	1.03646	1.01424	1.00169	1.01416	1.00307	1.00972	1.00084	1.02038	1.00395	1.02923	1.00665	1.02832	1.00942	1.02213	0.994532	1.00363	1.03323	1.03408	0.999071	1.02118	0.999449	1.02521	1.02552	1.02145	1.00812	1.03666	1.03533	1.01908	1.02014	1.00251	1.03072	1.03092	1.03162
treS	1.01992	1.0125	1.01753	1.0337	1.02047	1.01269	1.03244	1.02498	0.99675	1.0124	1.0124	0.998548	1.02186	0.992756	1.01049	1.00082	1.0223	1.00613	1.01302	1.01616	1.00996	1.00153	0.998355	1.01327	1.02492	1.00935	1.00336	1.00511	1.02624	1.03071	1.02695	1.01743	1.02069	1.03057	1.02208	1.02032	1.00129	0.997812	1.00779	1.00667
cgp_0070	1.01221	1.00916	1.03645	1.02759	1.02593	1.01858	1.00383	1.00697	1.01054	1.02363	1.01043	0.999136	1.01437	1.0252	1.01836	1.01298	1.02447	1.01877	1.02127	1.01276	1.01409	0.996086	1.01345	1.05366	1.03201	1.02699	1.01623	1.0011	1.02551	1.00089	1.01847	1.01189	1.03027	1.03631	1.01736	1.01491	1.02367	1.02523	0.998312	0.99625
cgp_0665	1.00905	0.997661	1.01963	1.01273	1.01664	1.02762	1.02294	1.02416	1.02503	1.01566	1.03881	1.02245	1.01726	1.00073	1.02234	1.00664	1.01572	1.0231	1.03248	1.03619	1.03103	0.995365	1.01235	1.03778	1.0226	1.03922	1.00467	1.02416	1.01632	1.00723	1.00796	1.01459	1.00405	1.01085	1.05192	1.01976	1.02432	1.00963	1.02348	1.02963
mtlD	0.997578	1.00571	1.01736	1.01416	1.01765	1.02227	1.00439	1.01356	1.02797	1.00009	1.03656	1.01526	0.986079	1.00095	1.00323	1.01788	1.03089	1.02851	1.01308	1.00884	1.02778	0.990486	1.01539	1.02571	1.01608	1.01927	1.00462	1.00908	1.02016	0.998607	1.00834	1.017	1.00415	1.01707	1.02098	1.01171	1.02942	1.00071	1.02018	1.02541
benA	1.03336	1.02032	1.0187	1.0245	1.01471	1.01745	1.01451	1.01195	1.00894	1.00327	1.02352	1.01726	0.994603	1.00385	1.0089	1.01034	1.016	0.991308	1.01229	1.02563	1.01791	0.979422	1.04115	1.01569	1.03305	1.01522	1.01731	1.002	1.02444	1.01678	1.01133	1.01139	1.00882	1.01423	1.00156	1.03571	1.0289	1.02758	1.02961	1.01646
dinP	1.02829	1.01441	1.01042	1.02051	1.01191	1.01038	1.01688	1.02389	1.01076	0.987747	1.0085	0.995089	0.986339	0.988679	0.998091	1.0216	1.01275	1.01828	1.01978	1.01485	1.00361	0.984978	1.02263	1.00341	1.03237	1.00673	1.01292	1.00902	1.03747	1.0019	1.00516	1.00107	1.01714	1.00001	1.01179	1.03115	1.03882	1.01168	1.00186	1.00351
cgp_0274	1.00884	1.02206	1.02654	1.02038	1.02303	1.02212	1.01443	1.00508	1.01865	1.00953	1.02414	0.984916	1.00127	0.997582	1.00772	1.01925	1.02387	1.00662	0.997365	1.01321	0.996716	0.994299	1.02276	1.02099	1.03845	1.0056	1.01003	1.01698	1.01237	1.03294	1.00774	1.0174	0.999375	1.00812	1.0045	1.0297	1.01972	1.02053	0.994193	1.00585
cgp_2680	1.00075	1.03178	1.03179	1.01102	1.00495	1.0195	1.02057	1.02119	1.01038	1.00969	1.03428	1.01488	1.00017	0.983293	1.02556	1.02004	1.00412	1.00882	1.00905	1.02161	1.0008	1.00267	1.00985	1.02842	1.02457	1.01473	1.00984	0.986768	1.00871	1.00459	1.00898	1.01848	0.998151	1.00625	1.01189	1.02299	1.01646	0.997101	1.01314	1.01507
cgp_0345	0.992556	1.01319	1.01763	1.01599	1.01732	1.01104	1.01354	1.00057	1.0312	1.00669	1.03433	1.01368	1.0106	0.965617	1.02946	1.01872	1.0073	1.02088	1.02195	1.01444	1.01093	0.985857	1.02728	1.0048	1.00602	1.00482	1.01713	1.01622	1.0238	1.02064	1.00929	1.00452	0.992354	0.996582	1.01511	1.02865	1.01671	1.00639	1.01756	1.00897
pat	0.99853	1.01503	1.02088	1.01549	1.00782	1.00463	1.017	1.0228	1.0157	1.00978	1.03748	0.986022	0.971063	1.00204	1.0199	1.02231	1.03012	1.01328	1.02285	0.981955	1.00808	1.00248	1.02983	1.01006	1.03475	1.00168	1.00122	1.01224	1.03462	1.02041	1.02173	1.02419	0.991899	1.02543	1.03725	1.03805	1.02084	1.01322	1.01836	1.00593
cgp_3290	1.01331	0.995221	1.01839	1.00536	1.01749	1.01312	0.993608	1.01722	1.01618	1.00261	1.00912	1.00373	1.02373	1.00971	1.0067	1.01117	1.01296	1.02058	1.01674	1.02536	1.01507	1.00893	1.02592	1.01373	1.00143	1.01245	1.00813	1.00066	1.00868	0.994969	1.00054	1.01218	1.0344	1.02013	1.0175	1.03937	1.03141	1.01083	1.00817	1.00387
cgp_2533	1.01443	0.995658	1.02479	1.00561	1.00926	1.00328	1.00216	1.0174	1.00447	0.999606	1.00115	1.01452	1.03127	1.00208	1.00725	1.01778	1.00933	1.0119	1.00292	1.02159	0.988816	0.993772	1.01838	1.01237	1.00225	0.990733	1.00531	0.994265	0.988892	0.986779	1.00694	1.00689	1.03564	1.01946	1.01412	1.0213	0.99698	1.00715	1.00375	1.00526
cgp_0875	1.02685	1.01918	1.02467	1.0193	1.00737	1.02401	1.01026	1.02678	0.998419	1.01108	1.00075	1.03685	1.02381	1.01963	1.01645	1.03127	1.01049	1.00313	1.01978	1.03208	1.00824	0.990781	1.02908	1.01605	1.02231	0.989104	1.00479	1.00439	1.03037	0.997141	1.01549	0.990731	1.02555	1.03138	1.03016	1.02388	1.00899	0.997335	1.00306	1.00325
cgp_1295	1.0075	0.999569	1.03277	1.0311	1.00719	1.01503	1.01889	1.01327	1.00325	1.01779	1.01764	1.00964	1.00938	1.03171	0.994706	1.02915	1.00753	0.999786	1.01578	1.0504	1.0088	0.959004	1.02188	1.01365	0.986094	1.00248	1.01383	1.00371	1.00469	1.00939	1.02164	1.02204	1.03693	1.04665	1.03239	1.03322	1.03801	1.01797	1.01222	0.990562
idhA3	0.988555	1.01802	1.01255	1.02076	1.0199	1.01107	1.02496	1.01541	1.01841	0.999336	1.00523	1.01104	1.02937	1.01164	1.0337	1.02396	1.02123	1.02468	1.01231	1.03444	1.01016	0.99047	1.01721	1.01309	1.01905	0.999955	1.02799	1.02538	1.02476	1.00929	1.0303	1.04702	1.01637	1.01103	1.00102	1.02951	1.01042	1.02247	1.02822	1.02047
cgp_2898	0.990161	1.01698	1.02407	1.00024	1.01699	1.01315	1.04008	1.01072	1.0041	0.993567	1.0374	1.01591	1.03464	1.0367	1.02586	1.00811	1.00726	1.01482	1.00723	1.03868	0.995442	0.989193	1.03015	1.01922	1.03574	0.998962	1.01564	1.02827	1.02977	1.016	1.01104	1.0251	1.02353	1.01218	1.01483	1.01227	1.01864	1.00682	1.0225	1.01853
cgp_2212	0.997652	1.02884	1.03662	1.02501	1.01621	1.02615	1.04835	0.995224	1.04012	1.00017	1.01629	1.02135	1.0227	1.03042	1.04464	1.01323	1.01064	1.02378	1.03109	1.02536	1.00262	0.979058	1.02273	1.01028	1.01126	1.00951	1.01464	1.00454	1.01308	1.00142	1.02433	1.03135	1.03763	1.01969	1.0253	0.998701	1.00614	1.02166	1.0222	0.994742
pyrG	1.02627	1.01924	1.02573	1.02051	1.01126	1.01911	1.03318	1.02809	1.00622	0.993272	1.02334	1.00521	1.03921	0.99397	1.02005	1.01103	1.01002	1.01034	1.00416	1.04718	1.02504	0.99176	1.01182	0.983256	1.00762	1.00495	1.00522	1.00335	1.0089	1.01992	1.02547	1.01972	1.01702	1.03004	1.00701	1.0122	1.00058	1.00004	1.01317	1.0056
cgp_2337	1.01679	1.02369	1.01526	1.01777	1.00941	1.01214	1.02845	1.01094	1.00448	0.997695	1.02244	1.02212	1.03513	0.993648	1.01034	1.02338	1.01603	1.01758	1.00904	1.03462	1.00511	0.991319	1.01367	0.995302	1.03799	0.999423	1.0006	1.02329	1.00742	1.01125	1.02247	1.01589	1.01333	1.01733	1.01479	1.00871	1.0115	1.00752	1.0096	1.00215
pcaK	1.02016	1.02461	1.00484	1.02711	0.995727	1.02969	1.03936	1.0236	1.00098	1.01469	0.993988	1.00613	1.02715	0.997313	1.01063	1.02155	1.03556	1.00985	1.00155	1.04071	1.01092	0.99823	1.01543	0.995048	0.997911	1.01593	1.00746	1.0137	1.02125	1.01286	1.02354	1.00851	1.02222	1.01727	1.00356	1.00598	1.00829	1.00524	1.00079	1.00941
cgp_1180	1.00423	1.02303	1.02487	1.02317	1.00936	1.03436	1.03484	1.0128	1.01917	0.996783	1.00091	0.986469	1.03512	0.970359	1.00788	1.01106	1.02484	0.994747	1.01374	1.03341	1.00951	0.989176	1.02282	0.985771	1.02273	1.008	1.00939	1.0091	1.01059	1.01335	1.0162	0.999016	1.00375	1.01081	1.02089	0.983765	0.996196	0.997396	0.992752	1.01208
nei	1.01253	1.00869	1.02817	1.0332	1.01065	1.03193	1.05664	1.02704	1.01705	1.00291	1.00932	1.005	1.00673	0.990169	1.01326	1.02851	1.03156	1.01751	1.00381	1.0461	1.02861	1.00554	1.00953	0.993186	1.02882	1.02244	1.01879	1.02804	1.0113	1.01443	1.02253	1.00263	1.03704	1.02169	1.0413	0.998232	1.00119	0.987879	1.01115	1.00786
cgp_2269	1.00786	1.03382	1.02941	1.01527	1.02141	1.03213	1.02662	1.00915	1.01534	0.988957	1.02462	1.01482	1.01089	0.992185	0.990319	1.0436	1.00952	1.02518	1.01498	1.02492	0.991186	1.01436	1.00828	0.983011	1.02838	1.01432	1.00403	1.00125	1.02297	1.03608	1.01476	1.03348	1.041	1.01393	1.01605	1.00315	1.00368	0.995901	1.00586	1.00902
dkgA	1.00385	0.988202	1.02392	1.02898	1.02247	1.03642	1.03844	1.03935	1.02538	1.00046	1.03057	1.03055	1.03051	1.00679	1.00046	1.03096	1.03709	1.02683	1.02061	1.03442	1.00688	1.00468	1.0042	1.00436	1.02876	1.02656	1.00464	1.01087	1.01418	1.04403	1.01207	1.03831	0.988328	1.00654	1.01402	1.0251	1.017	0.998126	1.02522	1.00684
cgp_1203	0.99539	0.999694	0.995295	1.01605	1.02474	1.02608	1.02179	1.01165	1.0296	0.998082	1.00903	1.00755	1.038	1.01062	1.01356	1.03669	1.01504	1.01806	1.0193	1.01836	0.99328	1.00742	0.981152	1.01346	1.01709	1.02909	1.01714	1.03053	1.01665	1.02519	1.0476	1.00999	0.992231	1.01472	1.03375	1.02081	1.00424	0.997433	1.02024	1.00362
cgp_0168	1.02502	0.979135	1.00561	1.01469	1.0262	1.02102	1.0321	1.03611	1.00751	1.01438	1.0186	0.99646	1.03701	0.992606	1.02021	1.00256	1.03126	1.02146	1.03087	1.00187	1.00518	1.00483	1.00291	1.03605	1.00768	1.00736	1.00089	1.02046	1.00582	1.04281	1.00911	1.03298	1.01503	1.00877	0.994449	1.01097	1.02057	1.01725	1.02876	1.00996
cgp_1311	1.01016	0.998968	1.02849	1.00532	1.01956	1.02428	1.04422	1.03159	1.01827	1.00168	1.02605	0.967807	1.02318	1.00797	1.00849	1.02617	1.02646	1.01156	1.01021	1.00084	0.989535	1.00955	1.01634	1.00466	1.03067	1.01016	1.00803	1.02634	1.00242	1.03201	1.04191	1.05045	1.00943	1.02794	1.00887	0.995785	1.02812	1.01107	1.00144	0.991509
cgp_2703	1.03947	1.01835	1.02463	1.03273	1.05463	1.0195	1.02799	1.01766	1.00399	1.03242	1.00715	1.02272	1.02523	1.01218	1.03225	0.996228	0.996616	1.02843	1.01015	1.02519	1.02526	1.02927	1.03082	1.02118	1.01999	0.994801	1.00263	0.996089	1.00571	1.02141	1.01389	1.00665	0.999042	1.01332	1.00649	1.01524	1.01894	1.02244	1.02796	1.02662
vanK	1.04689	1.01284	1.02766	1.01974	1.03064	1.0134	1.0309	1.0331	1.00934	0.99887	0.988343	1.0163	1.03969	1.01245	1.02636	1.00227	1.00373	1.00511	1.02294	1.03481	1.02255	1.00827	1.02771	1.00746	1.03083	1.00679	1.01601	1.02187	1.01567	1.01767	0.999976	1.0024	1.01065	1.01887	0.995828	1.03383	1.01974	0.99711	1.01558	1.01045
cgp_0568	1.0033	1.01579	1.01203	1.04752	1.04135	1.02182	1.03528	1.03347	1.017	1.01836	1.01948	1.03354	1.02114	1.03045	1.00625	0.995363	0.979329	1.01858	1.02763	1.02022	1.01605	1.01796	1.02411	1.00981	1.03716	1.00854	1.02187	1.01049	1.01381	0.996105	1.0171	1.00591	1.0166	1.00821	1.00603	1.02304	1.03871	0.999882	1.01361	1.02841
cgp_2328	1.03154	1.03059	1.03553	1.02682	1.01681	1.03012	1.04721	1.04387	1.02995	1.00976	1.00257	1.03407	1.02189	1.00395	1.02707	1.01491	1.00743	1.02032	1.02078	1.01546	1.00111	1.02147	1.00671	1.01236	1.03115	1.02669	1.01291	1.00528	1.00725	1.01516	1.02825	1.03011	1.02195	1.04104	0.991297	0.975042	1.02517	1.01653	1.02378	1.01486
cgp_1421	1.02131	1.0288	1.01615	1.02344	1.02027	1.03032	1.01826	1.02149	1.00351	1.01905	0.990804	1.01229	1.00192	1.00471	1.02792	1.02414	0.980918	1.02636	1.00942	1.03772	1.00612	0.988024	1.00534	1.01265	1.03147	0.991015	1.03544	1.01816	0.996307	1.00945	1.0147	1.0196	1.02982	1.01902	1.0113	0.979068	1.04223	0.984579	1.02407	1.00894
cgp_2322	1.02538	1.01314	1.01825	1.02198	1.0118	1.02283	1.02319	1.01351	1.01002	0.985973	0.980607	1.02275	1.03112	0.98643	1.04227	1.02265	1.02885	0.990694	0.997331	1.03782	1.03003	1.00929	1.00666	0.99708	1.03586	1.0148	1.01084	1.03084	1.04075	1.03049	1.0211	1.01178	1.02796	1.00589	1.03442	1.00862	0.998307	1.01449	1.02192	1.01561
cgp_1718	1.01107	1.02025	1.01168	1.00685	1.02567	1.04387	1.02101	1.03281	1.02845	0.999209	0.981793	1.00409	1.00974	0.975846	1.0253	1.02014	0.994058	0.993792	1.00388	1.07037	1.01202	0.988892	1.02708	0.99213	1.04325	1.01691	0.997402	1.00588	1.03497	1.02887	1.02091	1.02765	1.02112	1.03371	1.02983	1.0071	1.00124	1.00899	1.01515	0.988676
cgp_1226	1.02442	1.00518	1.01089	1.02621	1.01668	1.02133	1.00942	1.02142	1.00917	0.997103	1.00984	1.01002	1.03359	1.02363	1.03174	1.01437	1.00612	0.994716	0.985448	1.05072	1.03084	0.974008	1.03917	0.993649	1.05524	0.996071	1.02525	1.02087	1.00177	1.02795	1.01798	1.0239	1.00467	1.04933	1.03562	1.01007	1.0242	0.993002	1.02106	1.02354
cgp_1847	1.01374	1.01265	1.03112	1.03326	1.01349	1.02857	1.05087	1.0308	1.01862	1.003	0.980803	0.984572	1.01447	0.984416	1.02102	1.02321	1.03333	1.01463	1.00918	1.06376	1.00547	0.996855	1.00923	1.02205	1.04162	0.99151	1.03072	0.986477	1.0436	1.02825	1.04072	1.02631	1.02195	1.05151	1.02514	1.01734	1.01677	1.01427	1.01286	1.02463
cgp_3103	1.01196	1.02517	1.02463	1.0067	1.02592	1.02518	1.03627	1.02374	1.0324	1.00189	1.02726	1.00042	0.997599	1.03311	1.01665	1.02512	1.03507	1.03067	1.03009	1.02269	1.0062	1.01322	1.00896	1.0139	1.03407	1.02041	1.01026	1.02075	1.02536	1.01933	1.03731	1.02591	0.994237	1.00865	1.02431	1.01409	1.00726	1.02684	1.03928	1.02582
cgp_0134	1.02418	1.02069	1.02077	1.00961	1.02827	1.03714	1.02901	1.02284	1.01359	1.00829	1.04035	0.989667	1.03183	1.01822	1.00141	1.01935	1.03783	1.03299	1.02828	0.997064	1.00487	1.00556	1.00787	1.00312	0.998326	1.01045	1.01203	1.01821	1.03285	1.00927	1.04564	1.02826	1.01811	1.01131	1.03877	1.01342	1.00158	1.02052	1.03427	1.01577
cgp_1319	1.00719	1.0138	1.02751	1.02562	1.02468	1.05422	1.0369	1.04276	1.01728	1.00422	1.01113	1.01221	1.02091	1.02377	1.01913	1.02011	1.04006	1.02005	1.01085	1.02342	1.00665	0.998591	1.01954	0.998021	1.01305	1.02844	1.01669	1.01739	1.02807	1.03159	1.02449	1.03694	1.02654	1.02338	1.03372	1.0198	0.99754	1.01391	1.02524	1.01754
cgp_2590	1.02146	1.0156	1.02732	1.02679	1.03181	1.03089	1.03135	1.03165	1.0004	0.99101	1.02284	1.01046	1.02503	1.02353	1.02284	1.02587	1.02838	1.03079	1.01957	1.01822	1.00456	0.986974	1.03226	1.00973	1.01771	1.0165	1.02014	1.01367	1.0278	1.02529	1.01225	1.01354	0.99181	1.02543	1.01468	0.987982	1.00151	1.03012	1.02524	1.01538
mca	1.016	1.01693	1.02384	1.0265	1.01712	1.03282	1.03483	1.03676	1.01434	1.03091	1.03052	1.01295	1.02003	1.00846	1.02696	1.0095	1.04137	1.05664	1.04137	1.02698	1.00869	1.00063	1.03387	1.0051	1.03201	1.00901	1.024	1.01084	1.02281	1.05001	1.02634	1.04685	1.01534	1.02126	1.04041	1.03338	1.02101	1.02127	1.02459	1.04063
dccT	0.987179	1.02631	1.01496	1.02815	1.03216	1.0126	1.02733	1.0279	1.0267	1.02777	1.03752	1.01707	1.04439	1.00952	1.01592	1.01508	1.0114	1.03653	1.03074	1.00671	0.987566	0.978383	1.00695	1.04004	1.00864	1.01067	1.03061	1.01154	1.02728	1.03126	1.02423	1.0295	1.01546	1.02567	1.0161	1.01766	1.01591	1.01748	1.03224	1.01379
cgp_3390	1.01925	1.02048	1.01717	1.02203	1.01697	1.01823	1.02354	1.00694	1.02316	1.00566	1.03963	1.01206	1.03278	0.987743	1.00735	1.01628	1.00627	1.03401	1.02877	1.02154	1.02323	0.99014	1.03094	1.00583	0.983087	1.02505	1.01675	1.00847	1.04304	1.01116	1.0251	1.02648	1.02743	1.02695	1.03617	1.0023	1.03387	1.04122	1.027	1.02729
cgp_1142	1.03898	1.00469	1.02689	1.01692	1.03556	1.0241	1.0456	1.03102	1.01326	1.01561	1.04352	1.01039	1.03522	0.976528	1.02248	1.00838	1.00016	1.00212	1.01364	1.02597	1.0122	0.980943	1.01889	0.993403	1.01359	1.01947	1.00651	1.01822	1.02157	1.01612	1.02731	1.0253	1.02305	1.01406	1.03267	1.01368	1.03333	1.0149	1.02278	1.0068
cgp_1049	1.02225	1.02754	0.994758	1.00017	1.02419	1.01522	1.02632	1.01647	1.02134	1.00182	1.02654	1.01353	1.0203	0.987549	1.03892	1.00367	1.02306	1.01287	1.03065	0.999154	1.02319	1.01321	1.01329	0.999475	1.03687	1.00554	1.03227	0.992358	1.01683	1.01875	1.03726	1.01281	0.991613	1.01327	1.03386	1.00291	1.05153	1.01839	1.0232	1.03278
cmr	1.00148	1.0284	1.03849	1.01988	1.03373	1.0202	1.03229	1.01864	1.01089	1.01795	1.0212	1.01269	1.01613	1.00796	1.02278	1.03549	1.04047	1.01849	1.01403	1.02729	1.01617	1.00219	1.01108	1.0137	1.0154	1.02187	1.02423	1.00739	1.01067	0.977942	1.0412	1.01419	1.01711	1.02522	1.01305	1.01928	1.00347	1.01929	1.01725	1.02883
cgp_0768	0.98602	1.0345	1.02213	1.01986	1.01768	1.02353	1.01999	1.01865	1.01556	0.97887	1.00604	1.0404	1.05207	1.02076	1.00576	1.03601	1.03575	1.02864	1.01743	1.02278	1.01057	1.00445	1.00269	1.00017	1.03958	1.02478	1.02162	1.02034	1.01251	0.982974	1.02244	1.00593	1.0338	1.0295	1.00422	1.03927	1.01408	1.01348	1.01311	1.01725
cgp_2565	0.982324	1.03322	1.01055	1.01844	1.03205	1.02477	1.00256	1.01343	1.02384	1.00439	1.02891	1.06068	1.03958	1.02705	1.03185	1.04802	1.03451	1.0376	1.03335	1.04198	1.01953	1.00251	1.03037	1.01249	1.02196	1.01975	1.03629	1.02038	1.00057	1.00647	1.05057	1.04254	1.01659	1.03075	1.04671	1.01643	1.01922	1.01875	1.01337	1.02205
cgp_1064	1.03289	1.00074	1.01796	1.01559	1.01848	0.996107	1.00293	1.02664	1.03039	0.990769	1.03324	1.03623	1.03333	1.03502	1.03515	1.01887	1.01375	1.03612	1.02914	1.01587	1.02987	1.01227	1.03294	1.00482	1.00556	1.03012	1.03532	1.00204	1.03052	1.0254	1.0234	1.03369	1.02944	1.0311	1.00613	1.04794	1.02334	1.02444	1.00698	1.04675
cgp_0340	1.00832	1.02896	1.0261	1.02101	1.02903	0.985571	0.996447	1.01563	1.0261	1.00779	1.06145	1.03755	1.03273	1.02377	1.0346	1.0318	1.02008	1.01025	1.04146	1.0311	1.02474	0.991917	1.04023	1.01843	1.00083	1.00035	1.02349	1.02314	1.02114	1.00937	1.02302	1.02177	1.0124	1.00949	0.991989	1.02635	1.03024	1.03759	1.0296	1.03785
thiG	1.04671	1.01392	1.0254	1.02812	1.02606	1.02046	1.02128	1.04041	1.03804	0.996782	1.00157	1.03728	1.04018	1.03424	1.01833	1.02827	1.02986	1.02291	1.03282	1.04851	1.01716	1.00442	1.00582	1.04587	1.01338	0.995075	1.01908	1.03172	1.03315	1.00906	1.0493	1.03414	1.03746	1.00506	1.03545	1.01386	1.00699	1.02644	1.02363	1.00623
cgp_2214	1.0309	1.00722	1.0184	1.00814	1.01127	1.02342	1.02201	1.02226	1.01736	0.983605	1.00887	1.02887	1.0228	1.0361	1.02361	1.01506	1.01957	1.04186	1.03578	1.04621	1.0076	0.983944	1.03804	1.01979	1.04493	1.0114	1.03088	1.03496	1.04264	1.01527	1.04501	1.03857	1.02408	1.03408	1.02343	1.03624	0.992035	0.994693	1.01451	1.03073
rmpA	1.02605	1.00803	1.00707	0.990429	1.00882	1.01722	1.01171	1.01996	1.01914	0.971448	1.02883	1.01315	1.04907	1.0243	1.02745	1.01532	1.03473	1.03166	1.03328	1.03758	1.02955	1.0029	1.02271	1.03984	1.0336	1.03548	1.03642	1.03236	1.02985	1.01982	1.03351	1.02065	1.0398	1.02137	1.03653	1.02724	1.02277	1.03621	1.03134	1.02338
cgp_3398	1.01448	1.0221	1.01524	1.01762	1.01051	1.02697	1.01052	1.02676	1.01093	1.00362	1.01157	1.01242	1.07588	1.00967	1.02402	1.02445	1.03056	1.02002	1.0046	1.00989	1.00256	0.98548	1.02462	1.04334	1.0204	1.03811	1.03003	1.02305	1.02319	1.02852	1.0234	1.02137	1.02286	1.01131	1.02852	1.00681	1.01451	1.02576	1.02654	1.03007
cgp_2490	1.00231	1.03029	1.02095	1.0278	1.01119	1.05361	1.00129	1.02359	1.01533	0.986294	1.03063	1.01532	1.03964	1.00321	1.03429	1.02184	1.02511	1.01995	1.02218	1.04942	1.01714	1.01492	1.01738	0.999381	1.06223	1.02647	1.02455	1.03246	1.02109	1.00961	1.02551	1.03599	1.0319	1.01707	1.00911	1.00856	1.01154	1.01164	1.01253	1.02609
cgp_1332	1.03744	1.01308	1.02388	1.02294	1.01481	1.02485	1.00675	1.01822	1.0188	0.986404	1.03755	1.0181	1.02444	1.03508	1.02218	1.02305	0.992713	1.03249	1.01692	1.05431	1.01337	1.00585	1.02102	1.00041	1.03371	1.01781	1.02202	1.02454	1.04024	1.02513	1.02939	1.01778	1.04718	1.00376	1.01978	1.01223	1.02831	1.00789	1.0221	1.0227
cgp_1214	1.03611	1.01504	1.04784	1.04507	1.00065	1.02758	1.01619	1.01941	0.996677	1.0006	1.02095	1.05228	1.03055	1.01844	1.01632	1.0188	1.02695	1.02199	1.04114	1.03123	1.03748	0.99682	1.02011	1.0232	1.04246	1.02333	1.01501	1.03466	1.03113	1.03397	1.01788	1.04003	1.06024	1.03644	1.03025	1.0137	1.03181	1.01525	1.00479	1.0074
cgp_2078	1.03432	1.04751	1.05079	0.993181	1.00254	1.0479	1.017	1.04754	1.00181	0.97889	1.01093	1.01172	1.04336	1.03013	1.01725	1.0302	1.02414	1.03291	0.997412	1.06022	1.00009	0.993904	1.00118	1.00376	1.0171	0.997529	1.0255	1.00924	1.02134	1.04257	1.0378	1.01647	1.02796	1.01912	1.0153	1.00597	1.04544	1.00311	0.994352	1.03611
arcB	1.01521	1.0321	1.03854	1.01965	0.987068	1.00656	1.00375	1.02589	1.00947	0.979804	0.988604	1.0193	1.05256	1.01625	1.02683	0.997141	1.00774	1.02091	1.0136	1.05686	1.01543	1.01154	1.06337	1.01524	1.01686	1.00132	1.01459	1.01677	1.03235	1.01623	1.01199	1.0309	0.995375	1.00845	1.00462	1.01509	1.01353	1.00677	0.999813	1.0223
cgp_1234	1.01733	1.02313	1.03113	1.01118	1.01186	1.02385	1.02424	1.02505	1.00554	1.00711	0.994394	1.01071	1.01128	1.0076	1.00663	1.00385	1.02407	1.0073	1.01042	1.01029	1.01299	1.01044	0.994761	0.996225	1.01059	1.00454	1.0163	1.01787	1.00465	1.02497	1.02569	1.01709	1.0044	1.01122	1.03545	1.01284	1.02496	1.01483	1.00246	1.01546
cgp_2343	1.02322	1.0103	1.02251	1.02041	1.00728	1.02468	1.03355	1.02952	1.00979	0.986988	0.986976	0.999025	1.01107	1.00149	1.012	1.01175	1.01685	1.0077	0.995725	1.02794	0.998241	1.00539	0.994027	0.983191	1.01991	1.01588	1.00181	1.00745	1.00742	1.03123	1.0195	1.02255	1.00909	1.00439	1.01645	1.01387	1.02787	1.00534	0.998018	0.994047
narG	1.03	0.997911	1.02479	1.02159	1.02464	1.0242	1.02437	1.0187	1.01333	1.0044	1.0076	1.02153	1.01093	1.00533	1.01492	1.02285	1.01823	1.01805	1.02125	1.03408	1.00511	0.987536	1.00998	0.975306	1.02104	1.02348	1.01955	1.00842	1.01071	1.02921	1.03719	1.02509	1.01972	1.02374	1.0107	1.01725	1.02203	1.00469	0.98711	1.00752
gst	1.02396	1.03206	1.02112	1.02731	1.00425	1.02248	1.00537	1.01404	1.0155	1.00337	0.989843	1.02337	1.01078	1.01844	1.01367	1.01021	1.00204	0.999588	0.991518	1.02135	1.00291	0.969104	0.999091	0.982869	0.986549	1.00662	1.0149	1.00813	1.00442	1.03993	1.02144	1.02255	1.02639	1.02353	1.00775	1.00564	1.01943	1.01144	1.00611	1.0068
cgp_2329	1.02039	1.01821	1.01346	1.01672	1.01633	1.01568	1.02027	1.01358	1.00644	1.00789	0.957294	1.02796	1.00616	1.00487	1.03282	1.01954	0.999451	1.03083	1.01277	1.03523	1.0062	1.01074	1.01245	1.01678	1.00138	1.01047	1.01598	1.02546	1.0118	1.0167	1.01933	1.03901	1.00509	1.01245	1.03999	1.02695	1.03502	1.01636	1.00836	1.01441
glgP1	1.02963	1.02196	1.03077	1.01509	0.986292	1.02177	1.02479	1.03726	1.01295	0.983651	0.948702	1.03745	1.02507	0.984195	1.03117	1.04085	1.01197	1.01401	1.02405	1.02632	1.02674	0.989739	1.00653	0.993856	0.996148	1.00719	1.0218	1.0163	1.01417	1.01587	1.01675	1.01863	1.02376	1.0268	1.01909	1.02262	1.02508	1.01919	1.01281	1.02174
cgp_2277	1.04244	1.01259	1.03637	1.03877	1.02893	1.00782	1.03109	1.02303	1.01138	0.966714	0.989017	1.04665	1.014	1.00635	1.02969	1.00874	1.00509	1.01764	1.021	1.0155	1.00285	0.990414	1.01347	1.00573	1.01835	1.02851	1.01717	1.00256	1.00832	1.0179	1.03174	1.03516	1.02273	1.01732	1.01475	1.01588	1.01921	0.997493	1.017	0.997167
narH	1.02231	1.03306	1.012	1.01922	1.00725	1.02793	1.00652	1.02552	1.01229	0.964494	0.99487	1.04828	1.0118	1.02943	1.02014	1.0103	0.989114	1.01576	1.02883	1.03617	0.972779	1.00437	0.999448	1.00926	1.00044	1.04743	1.00206	1.02537	1.00757	1.01316	1.01536	1.02734	1.04191	1.03437	1.01622	1.02626	1.00661	1.00366	1.00473	0.999868
cgp_2226	1.00395	1.01286	1.00685	1.01546	1.0252	0.989742	1.01983	1.01458	0.999147	0.990451	1.00747	1.04696	1.0038	1.03416	1.02946	0.991722	1.01381	0.992862	1.01133	1.02215	1.01719	0.983818	0.992795	1.01223	1.01243	1.03481	1.01702	1.02237	1.00226	1.03275	1.0218	0.999325	1.02437	1.03047	1.00877	1.03052	1.02465	1.01377	0.995482	0.99881
cgp_1419	1.04668	0.993676	1.0145	1.00499	1.02829	1.03683	1.0307	1.00843	1.03387	1.01141	1.0004	1.06041	1.03952	1.01068	1.02188	1.02574	1.01525	1.02551	1.04204	1.03504	1.00431	0.970766	0.98104	0.984733	1.00886	1.04224	1.02596	1.03795	1.00819	1.04461	0.998386	1.01216	1.02484	1.0094	1.00297	1.03768	1.03173	1.02036	1.02755	0.996066
cgp_1068	1.04856	0.993754	1.01645	1.01061	1.01063	1.02363	1.03802	1.01338	1.01085	0.994637	1.03886	1.06434	0.994636	0.982392	1.01726	1.01154	1.01198	1.01428	1.00316	1.04009	1.02316	1.0095	1.01003	1.00134	1.00312	0.987689	1.01146	1.03298	0.997938	1.02224	1.01494	1.02188	1.03081	1.0033	1.00122	1.03794	1.03425	0.99957	1.00347	1.00341
ssuC	1.03817	0.975146	1.0107	0.977364	1.02354	1.01189	1.00983	1.02996	1.0034	1.02365	1.01093	1.04422	0.987854	0.979746	1.00016	1.02204	0.997274	0.962845	1.02305	1.02157	1.01176	0.993006	0.999278	1.02974	1.0053	1.02595	1.03647	1.01819	1.01267	1.02286	1.03034	1.01371	1.01562	1.00211	1.00715	1.01874	1.02597	1.00348	1.01361	0.996695
cgp_0256	1.01504	1.05354	0.992924	1.00585	1.0018	1.00688	1.02116	1.0169	1.00821	1.03353	1.01969	1.06199	1.01031	1.00459	1.00653	1.00741	1.00384	1.02939	1.01819	1.04113	1.01751	0.977585	1.00604	1.04005	1.0155	1.00079	1.00004	0.997301	1.02324	1.00996	1.02048	1.02319	1.04061	1.03747	1.01575	1.01223	1.03145	1.01387	1.029	1.02213
cgp_1313	1.03304	1.00709	1.01917	0.997787	1.03753	1.00805	1.0099	1.01345	1.01645	0.991088	0.995967	1.06606	1.01221	1.01652	1.00269	1.00503	1.0057	0.994451	1.01883	1.05681	1.00012	0.981732	1.00397	1.00967	1.02293	0.994395	1.0271	0.985943	1.01605	1.01861	1.03128	1.02087	1.04612	1.03887	1.02103	1.01104	1.05255	1.00569	1.00428	0.998416
cgp_3193	1.05289	1.03988	1.01276	0.992923	1.00412	0.999625	1.01293	0.987306	1.01618	0.963466	0.98573	1.05021	1.01395	0.992242	1.02511	1.01436	1.0281	1.02987	1.02423	1.00334	1.01273	0.999226	1.00938	1.03246	1.00559	1.01962	0.991337	0.996139	1.01311	1.02428	1.00467	1.02523	1.05614	1.02806	1.03589	1.03135	1.02913	1.02074	1.02679	1.0172
cgp_3207	0.99949	1.01774	1.02968	0.995643	1.01484	0.997337	1.00845	0.998095	1.02977	1.00019	0.99298	1.04972	1.02827	1.02852	0.992541	1.02488	1.00928	1.01948	1.01009	1.0103	0.99734	0.998356	1.02884	1.01354	0.963121	1.00793	1.00423	1.01509	1.03079	1.01102	0.985074	1.02983	0.997816	1.03694	1.04159	1.02531	1.03196	1.015	1.02797	1.00268
cgp_0799	1.03285	1.01491	0.981753	0.962446	1.03105	0.994288	0.993073	1.00328	1.01788	0.998369	0.99863	1.05433	1.03287	0.985115	1.01524	1.01708	0.997256	1.03174	1.01832	1.04712	1.01915	0.987423	1.01078	1.00804	0.999952	1.01017	0.997062	1.00149	1.01944	1.00606	1.01127	1.01631	0.981864	1.00742	1.01829	1.03453	1.03687	0.997681	1.03495	1.00404
cgp_1218	1.0621	1.01057	1.00696	1.00634	1.03395	1.03054	0.995782	1.04219	0.996437	0.943749	1.03139	1.01446	1.02382	0.98181	1.02054	1.02652	1.0102	1.00843	1.01329	1.00872	1.01399	0.988517	1.03172	1.0248	1.04538	1.01212	1.03258	1.01515	1.01936	0.992954	1.02	1.00662	1.01595	1.03652	1.01814	1.0184	1.0474	0.993746	1.00979	0.998286
cgp_0712	1.03776	1.00064	1.00446	1.01659	0.995849	1.01146	1.01874	1.02265	1.00439	0.976308	0.99348	1.01595	1.02601	0.990578	1.04319	0.993869	1.02405	1.00078	1.00247	1.02628	0.994723	0.958482	1.03126	1.01761	1.00859	0.987054	1.01057	1.01393	1.01703	1.02065	0.982293	1.00899	1.01681	1.03096	1.03191	0.975839	1.03086	0.980418	1.01584	1.02098
cgp_0866	1.05686	1.01419	1.02551	1.01961	1.00074	0.987054	1.0265	1.00146	0.998696	0.981742	1.01853	1.0011	1.02935	0.987136	1.03213	1.03917	1.05575	1.00106	1.06286	1.05856	1.02944	1.00546	1.04493	1.02561	1.02598	1.0117	1.02393	1.02796	0.978088	1.01779	0.994168	1.02174	0.998849	1.03568	1.02168	1.01071	1.04434	1.0226	1.00851	1.01183
cgp_2712	1.05184	1.02211	1.01235	1.01921	0.994803	1.01497	1.03278	1.04355	1.02123	0.969327	1.02733	1.06689	1.01665	1.00808	0.980115	1.02085	1.03311	1.03576	1.01518	1.02014	0.987235	0.990875	1.05475	1.01703	0.983024	0.982387	1.01448	1.03362	1.01033	1.0218	0.980947	1.05667	0.996298	1.01339	1.02073	1.03727	1.0078	1.01109	1.00163	1.01308
nagL	1.02405	1.02784	1.03196	1.02366	1.03471	1.00605	1.00122	1.02853	1.03139	1.01424	1.03369	1.02718	1.03465	1.03644	1.02371	1.02495	1.01714	1.03034	1.03183	1.00483	1.01703	1.00917	1.03044	1.03859	1.03008	1.01597	1.01429	1.02195	1.0287	1.01602	1.03763	1.0216	1.03488	1.01533	1.0397	1.03006	1.03308	1.02686	1.03789	1.03071
putA	1.01541	1.01221	1.01709	1.02112	1.03109	1.01467	1.01583	1.01139	1.02176	1.01391	1.02476	1.01234	1.03779	1.0212	1.02687	1.03081	1.02493	1.03477	1.02632	1.01765	1.01782	1.00084	1.04006	1.03212	1.02159	1.02114	1.00817	1.01183	1.03136	1.02099	1.02622	1.01918	1.01503	1.01507	1.03945	1.03147	1.0278	1.0185	1.01756	1.02902
cgp_0138	1.0162	1.02569	1.03741	1.00833	1.01361	1.01381	1.01507	1.03031	1.03376	1.0183	1.02182	1.01758	1.03178	1.02729	1.01678	1.01255	1.02216	1.03607	1.0404	1.02253	1.02899	1.00943	1.03354	1.03716	1.02541	1.02383	1.01175	1.01044	1.00239	1.01028	1.02664	1.02118	1.02082	1.02586	1.01825	1.02405	1.00635	1.03116	1.03193	1.02798
cgp_2587	1.01591	1.0316	1.02454	1.03567	1.03824	1.02846	1.02466	1.02954	1.03121	1.02345	1.00342	1.03979	1.04727	1.02364	1.01967	1.03044	1.01968	1.03539	1.03625	1.0278	1.0248	1.02933	1.04219	1.01965	1.01137	1.017	1.02351	1.01777	1.00884	1.02367	1.03343	1.02522	1.02475	1.00769	1.03021	1.03081	1.02509	1.0225	1.02655	1.0279
cgp_0732	1.02314	1.00353	1.03716	1.01692	1.04401	1.023	1.0201	1.02805	1.02656	1.00554	1.0191	1.04186	1.02853	1.04674	1.02952	1.03566	1.02866	1.03259	1.03994	1.0372	1.02658	1.00166	1.0291	1.0324	1.04212	1.0253	1.00948	1.01667	1.01026	1.02449	1.03699	1.04137	1.02399	1.01177	1.02895	1.01172	1.04375	1.02073	1.02764	1.03435
cgp_0291	1.04879	1.04607	1.02411	1.03035	1.0372	1.02119	1.01653	1.04219	1.02215	1.00582	1.03391	1.02331	1.02609	1.01209	1.02838	1.01222	1.0352	1.02932	1.04629	1.03358	1.03282	1.02312	1.03662	1.04768	1.04193	1.01333	1.02384	1.02254	1.03094	1.00989	1.03274	1.03896	1.02227	1.03217	1.03882	1.02971	1.02495	1.0438	1.03419	1.04617
amn	1.02372	1.02967	1.02981	1.03517	1.02801	1.01214	1.03141	1.02776	1.03593	1.03054	1.05637	1.03453	1.03492	1.03079	1.02364	1.02394	1.02557	1.04149	1.03944	1.03517	1.02717	1.00961	1.02993	1.03304	1.03984	1.01489	1.02341	1.0315	1.0272	1.00729	1.02318	1.03012	1.00338	1.0253	1.03556	1.02743	1.00518	1.03923	1.0466	1.03836
cgp_0288	1.0301	1.04532	1.02146	1.02889	1.0362	1.0238	1.01897	1.0379	1.02545	1.02773	1.05411	1.03888	1.02248	1.03071	1.03254	1.03059	1.03509	1.04187	1.04865	1.00484	1.03733	1.02387	1.04821	1.04613	1.02381	1.01781	1.0142	1.01717	1.01871	1.01828	1.03514	1.03897	1.02248	1.01629	1.01635	1.03801	1.03363	1.0183	1.03017	1.04102
cgp_3368	1.0246	1.03366	1.02956	1.01141	1.04497	1.01969	1.02681	1.01821	1.031	1.02867	1.03289	1.02419	1.02173	1.04243	1.01754	1.0246	1.03187	1.03937	1.04542	1.01769	1.02792	1.02186	1.04296	1.05156	1.01989	1.02465	1.02573	1.02166	1.03255	1.01867	1.04108	1.03592	1.01935	1.02086	1.02554	1.02022	1.0269	1.02954	1.02945	1.03386
cgp_0622	1.01102	1.02902	1.02183	1.01746	1.02893	1.01638	1.02731	1.0027	1.02207	1.02194	1.0249	1.02707	1.01658	1.02979	1.02757	1.02536	1.02685	1.02037	1.03107	1.03798	1.04504	1.02702	1.03962	1.02057	1.02822	1.0329	1.02634	1.01538	1.03663	1.01017	1.01706	1.02467	1.03718	1.0299	1.04618	1.05289	1.03953	1.00978	1.03278	1.0201
nanA	1.00026	1.03947	1.03509	1.03648	1.02245	1.02557	1.02958	1.03068	1.03538	1.02763	1.03787	1.03082	1.02354	1.00344	1.01804	1.02898	1.03917	1.03651	1.04676	1.02661	1.03103	1.02452	1.00563	1.02363	1.02334	1.01496	1.00773	1.01031	1.02139	1.00727	1.02246	1.02614	1.03055	1.02032	1.03484	1.03537	1.05271	1.02721	1.02788	1.02693
cgp_0745	1.00511	1.00501	1.02805	1.04152	1.03262	1.03241	1.04651	1.01875	1.03345	1.02926	1.02384	1.05204	1.05003	1.01501	1.03019	1.01841	1.057	1.03802	1.03762	1.02718	1.03153	0.998954	1.00526	1.04492	1.05772	1.0322	1.03777	1.00145	1.01177	1.02956	1.04024	1.03625	1.01735	1.03627	1.02824	1.0463	1.0111	1.02026	1.0336	1.03393
cgp_3367	1.02763	1.04035	1.03901	1.0272	1.03107	1.03446	1.02154	1.03971	1.03447	1.04336	1.02879	1.075	1.03505	1.02567	1.02584	1.02103	1.05352	1.03349	1.02759	1.02168	1.01064	0.998311	1.01061	1.05198	1.02997	1.03589	1.02511	1.01287	1.022	1.0087	1.02884	1.0163	1.04609	0.993843	1.0258	1.02635	1.01912	1.02147	1.02754	1.02107
cgp_0166	0.997444	1.03232	1.02164	1.04253	1.02761	1.02556	1.03199	1.03249	1.03387	1.03899	1.05839	1.03184	1.04968	1.01892	1.03443	1.02334	1.04531	1.04286	1.05589	1.01126	1.03237	1.02541	1.0521	1.04964	1.04707	1.0396	1.01059	1.01179	1.0077	1.0136	1.01355	1.01327	1.02178	1.03482	1.02349	1.03534	1.04557	1.01841	1.04001	1.04265
alkB	1.01203	1.046	1.01386	1.02864	1.03679	1.0261	1.05086	1.03983	1.04861	1.04026	1.04257	1.02689	1.03862	1.04129	1.03425	1.00319	1.01825	1.03664	1.02769	1.00374	0.999931	1.02865	1.0519	1.0529	1.04287	1.03631	1.03412	1.03289	1.028	1.01493	1.03656	1.02291	1.008	1.04018	1.03118	1.02446	1.0115	1.05128	1.03021	1.03078
cgp_2244	1.04564	1.03134	1.03038	1.04654	1.04671	1.04303	1.03588	1.02595	1.02746	1.01628	1.03765	0.996294	1.01863	1.02784	1.0367	1.05053	1.04358	1.02032	1.03369	1.04871	1.03074	0.998838	1.03002	1.03033	1.0244	1.04606	1.02971	1.03256	1.02319	1.03986	1.03539	1.03321	0.999182	1.0327	1.05424	1.02618	1.01903	1.04233	1.02276	1.02086
thiD2	1.01865	1.02734	1.01331	1.02738	1.05084	1.04657	1.03595	1.03014	1.03936	1.02702	1.02033	0.982279	0.995097	1.03546	1.00958	1.03633	1.05933	1.03668	1.03453	1.0169	1.04573	1.00068	1.04922	1.05156	1.00796	1.03193	1.03476	1.01286	1.02919	1.04495	1.03183	1.03468	1.0197	1.03154	1.04083	1.02667	1.0263	1.04126	1.02516	1.04126
thiD2	1.01426	1.00978	1.01479	1.01145	1.01611	1.01125	1.00125	1.01091	1.01745	1.00534	1.02511	1.02529	1.00702	1.0136	1.00439	1.00532	1.00782	1.01813	1.01463	0.987166	1.01858	0.995758	1.02451	1.01927	0.990422	1.01528	1.00924	1.01324	1.01593	0.99347	1.01069	1.00666	1.00691	1.00641	1.0231	1.00324	0.987807	1.02675	1.01722	1.01293
cgp_0074	0.994495	1.01018	1.0182	1.02366	1.04231	1.04059	1.04091	1.03248	1.02024	1.00184	1.03111	1.01963	1.03457	1.03393	1.02852	1.02525	1.05082	0.998191	1.03666	1.04189	1.02346	0.995243	1.02435	1.03938	1.01896	1.00169	1.00926	1.04509	1.04202	1.0473	1.02795	1.02926	1.00646	1.03362	1.02731	1.01952	1.00892	1.03983	1.02366	1.03001
cgp_0049	1.01082	1.01929	1.02101	1.03801	1.03661	1.04151	1.04689	1.02932	1.02596	1.02343	1.03476	1.02796	1.0173	1.04784	1.02008	1.03453	1.02624	1.03469	1.03947	1.04965	1.02296	1.02358	1.03753	1.05706	1.00866	1.03402	1.01484	1.01109	1.02945	1.02262	0.998169	0.957269	1.04	1.02769	1.02626	1.00458	1.00844	1.03659	1.04364	1.03449
cgp_2883	1.01871	1.03812	1.03777	1.00318	1.03386	1.03465	1.02713	1.03638	1.03182	1.02563	1.02791	1.02671	1.02069	0.998887	0.990622	1.04871	1.05175	1.02054	1.04165	0.996305	1.04291	1.00333	1.05747	1.04929	1.0201	1.04109	1.01768	1.0287	1.02173	1.04882	1.02673	1.03927	1.034	1.01394	1.03004	1.03303	1.02444	1.00664	1.01899	1.01244
cgp_3087	1.01389	1.00306	1.00785	0.992633	1.03712	1.02191	1.02614	1.03229	1.02252	1.02688	1.05319	1.01802	1.01608	0.960208	1.00365	1.02186	1.03739	1.02609	1.04027	1.02333	1.02999	1.0062	1.02501	1.04181	1.03303	1.0358	1.0155	1.02308	1.01369	1.04218	1.01762	1.0456	1.02337	1.02002	1.02977	1.03032	1.00201	1.03193	1.02709	1.03128
cgp_0316	1.06402	1.02659	1.02289	1.008	1.03772	1.02956	1.00506	1.02753	1.0234	1.01423	1.03868	1.06937	1.01326	1.0141	1.01804	1.03869	1.0366	1.02514	1.05281	1.01695	0.993924	1.00183	1.03676	1.06126	1.01465	1.02421	1.02349	1.00127	1.00961	1.04974	1.03786	1.04956	1.02458	1.02089	1.03863	1.0011	1.03012	1.02893	1.04976	1.0374
mrpG	1.04943	1.01645	1.02042	1.02838	1.04983	1.03182	1.02992	1.01604	1.04239	1.03809	0.9804	1.0475	1.02749	1.00262	1.00863	1.03939	1.02661	1.02122	1.0611	1.01555	1.0289	1.02562	1.00642	1.0175	1.03397	1.01792	1.00964	1.00217	1.00602	1.02527	1.00946	1.04852	1.03495	1.00728	1.00731	1.0215	0.996793	1.02301	1.01919	1.03536
cgp_2324	1.03621	1.00329	1.0165	1.02146	1.04146	1.02523	1.04261	1.02408	1.03937	1.03082	0.987166	1.02688	1.01264	1.02118	1.0318	1.03583	1.05411	1.01879	1.04376	1.02665	1.01939	1.01719	1.01648	0.989304	1.01771	1.02524	1.0271	1.01302	1.01007	1.00143	1.03159	1.03859	1.0432	1.01909	1.02766	1.00369	1.03386	1.00093	1.01741	1.03675
mrpE	1.04676	1.03257	1.01858	1.0182	1.03267	1.05701	1.03833	1.04777	1.00569	0.979361	0.989177	1.06672	0.963915	1.03063	1.03922	1.02748	1.0291	1.02119	1.01493	1.02867	1.02943	1.00742	1.00771	1.05644	1.06464	1.01339	1.02262	1.03372	1.01839	1.01933	1.03346	1.0428	1.04434	1.01572	1.05748	1.03715	1.0309	1.01659	1.02777	1.03178
cgtS6	1.01176	0.987222	1.02043	1.0483	1.03352	1.03603	1.02917	1.03999	1.03861	0.999907	1.02056	1.05753	0.971499	1.03518	1.00371	1.00976	1.05332	1.0521	1.0167	1.01244	1.00303	1.03246	1.01334	1.05133	1.00355	1.03731	1.03441	1.03431	1.01089	1.00085	1.02766	1.03241	0.98748	1.0283	1.03109	1.02308	1.00338	1.02773	1.04273	1.03903
cgp_0040	1.01018	1.03229	1.01392	0.995102	1.03117	0.995924	1.00342	1.00669	1.02556	0.999966	1.01883	1.00732	1.00343	1.02047	0.998056	1.02707	1.0109	1.02635	1.01507	1.00938	1.00337	0.99713	1.02468	1.0186	1.01513	1.00327	1.0113	0.998656	0.991228	0.994928	1.00593	1.00003	1.00278	0.994847	1.00756	0.995887	1.01933	1.0167	1.02484	1.02666
iolP	1.01837	1.01515	1.01011	0.997574	1.02141	1.00622	1.00627	1.00272	1.0121	1.00461	1.01824	1.01718	1.00981	1.01669	1.00323	1.0177	1.01382	1.02238	1.03134	1.01201	0.982689	1.01592	1.01695	1.02777	1.00505	1.00011	0.999996	1.01261	1.00713	0.976123	1.00144	1.01109	0.998636	0.984374	1.00939	1.00343	1.00464	1.01319	1.00944	1.01858
cgp_0071	0.994629	1.02015	1.00427	1.00618	1.01672	1.01101	1.01725	1.00016	1.02411	1.00548	1.0336	0.990674	1.00738	1.04344	1.01185	1.00128	1.01456	1.0381	1.02879	1.00895	1.00119	1.01273	1.03421	1.0373	0.997482	0.997328	1.00638	1.02132	1.01155	1.00018	1.01569	1.02028	1.00054	1.00637	1.01904	0.996896	1.00559	1.02672	1.01594	1.02462
iolG	0.994445	1.00159	1.00387	1.01352	1.0192	1.01269	0.997684	1.01384	1.01224	1.00985	1.01399	1.01232	1.0328	1.02787	1.00157	1.02426	0.990449	1.02077	1.01276	1.00706	1.01593	0.998492	1.03223	1.03582	1.01166	1.00368	1.00651	1.02194	1.00222	0.998827	1.02564	1.02802	0.994918	0.993543	1.00427	1.01782	0.998025	1.01872	1.01927	1.03889
cgp_0579	0.982615	1.02296	1.01014	1.00346	1.01586	1.01611	1.01708	1.01984	1.0036	1.02058	1.02721	1.00363	1.03094	1.02583	0.984665	1.03629	1.016	1.01586	1.02118	1.01586	1.00367	0.994919	1.0036	1.02616	1.00382	1.01074	1.00317	1.02271	1.00494	0.986178	1.02734	1.00884	0.998097	1.00291	1.02423	1.01584	1.00562	1.01562	0.998934	1.02813
cgp_3153	0.978707	1.01941	1.00323	0.996814	1.02677	1.00274	0.993827	1.00658	1.01577	1.00479	1.03761	1.01059	1.00338	1.00611	1.02389	1.01229	1.00605	1.03121	1.03049	0.968638	1.00143	1.00026	1.00787	1.03497	1.02342	0.989667	1.01041	1.02255	0.999398	0.99617	1.01848	1.01554	1.01569	0.998412	1.03623	1.01966	1.01712	1.01519	1.02643	1.01526
cgp_0131	0.984051	1.01061	1.01119	0.990816	1.01414	1.00677	1.00629	0.997473	1.01189	1.01179	1.02295	1.00661	1.01648	1.01181	1.01479	1.00352	1.00201	1.01724	1.03781	0.995603	1.01763	1.00866	1.00579	1.03295	1.01367	0.984948	1.00583	1.02027	0.991853	1.0036	1.00288	1.02367	1.00285	0.998936	1.00255	0.998384	1.03186	1.00969	1.02664	1.02046
lip2	1.00535	0.998507	1.02953	1.01678	1.02161	1.0112	1.0051	0.994511	1.01781	1.01629	1.02058	0.986055	1.02178	0.986327	1.00125	1.01982	1.0265	1.00617	1.01695	1.00108	1.00413	1.00494	1.02065	1.01677	1.00752	1.02067	1.00373	1.0121	1.01125	1.02247	1.00142	1.01926	1.01278	1.0074	1.02542	1.01925	1.0225	1.03009	1.02998	1.02535
betB	0.986486	1.02242	1.01673	1.00036	1.02481	1.00128	1.02102	1.00052	1.02076	0.986536	1.0134	1.00499	1.01804	0.98375	1.01127	1.02663	1.00952	1.01557	1.02318	1.00847	1.02593	1.01814	1.01169	1.02466	1.00484	1.01558	1.00105	1.0012	1.01769	1.00512	0.999313	1.0216	1.00698	1.02249	1.03454	1.02472	1.02488	1.01918	1.0175	1.00782
cgp_0035	1.0054	0.998315	1.01497	1.01713	1.02826	1.01371	1.01239	1.02019	1.02103	0.997796	1.02093	1.01195	0.993948	1.00183	1.00864	1.01905	1.01055	1.0086	1.01697	1.00782	0.998614	0.990581	1.03325	1.05563	1.00478	0.984517	0.998473	1.01239	1.01624	1.01277	1.01511	1.02189	1.01277	1.02406	1.02822	1.01827	0.994811	1.02353	1.02135	1.02068
cgp_0363	0.985676	0.99888	1.00652	1.01182	1.02136	1.0003	1.01187	1.01092	1.02534	1.02152	1.03081	1.00991	1.0111	1.00746	1.01871	1.01789	1.01123	1.01963	1.02725	1.01853	0.995429	1.0005	1.04437	1.02891	1.01148	0.990953	1.00731	0.993517	1.01258	0.996401	1.01856	1.00558	1.01511	0.995336	1.01173	1.01252	1.01118	1.00833	1.0179	1.01186
cgp_3393	1.02089	1.02175	1.01919	1.01617	1.02878	1.02515	1.02353	1.02317	1.02331	1.01768	1.01269	1.02025	1.01915	1.01753	1.01192	1.019	1.01468	1.02501	1.02149	1.02173	1.02333	1.00417	1.01969	1.03187	1.01394	1.02055	1.02094	1.0177	1.01945	1.01648	1.02361	1.02411	1.02425	1.01828	1.02453	1.00937	1.01769	1.02632	1.02618	1.02327
gltB	1.01641	1.0147	1.00718	1.01026	1.02104	1.01341	1.01903	1.01476	1.01273	0.999632	1.01577	1.01552	1.00768	1.00855	1.01891	1.01486	1.02176	1.02168	1.0243	1.01261	1.02172	0.991831	1.03078	1.02914	1.00977	1.00439	1.01127	1.02298	1.01382	1.01143	1.01569	1.01855	1.01113	1.00723	1.01968	1.01175	1.0082	1.02054	1.01917	1.01397
cgp_3232	1.01781	1.01026	1.01599	1.01759	1.02686	1.00289	1.02117	0.997796	1.01869	1.00967	1.01616	1.03203	1.0191	1.02373	1.01595	1.01386	1.01053	1.02819	1.02459	1.00364	1.0179	1.00495	1.00204	1.02996	1.00718	1.01723	1.01119	0.995463	1.0104	1.0041	1.01659	1.02166	1.01314	1.0172	1.01455	1.02131	0.991322	1.02065	1.02168	1.01381
cgp_3213	1.02483	1.00408	1.00758	0.998206	1.01332	1.00595	1.01981	1.0205	1.01468	1.03486	1.01691	1.00578	1.0223	1.02248	1.00906	1.01706	1.01158	1.01238	1.02208	1.01114	1.01834	1.00133	1.02095	1.02658	0.995829	1.00876	1.01082	1.00644	1.02518	1.00385	1.02029	1.01557	1.01241	1.01062	1.01464	1.00904	1.0059	1.00674	1.00243	1.01301
adhA	1.02988	0.995913	1.02333	1.00551	1.02894	1.00815	1.02727	1.02091	1.03025	0.995755	1.01429	1.01336	1.02261	1.00019	1.02239	1.03192	1.01348	1.01993	1.01874	1.01312	1.01394	1.00014	1.01791	1.03597	0.996109	0.99854	1.02606	1.01656	1.01869	1.01117	1.02484	1.01311	0.998427	1.00262	1.01402	1.01873	1.02548	1.0093	1.02472	1.02697
cgp_3085	1.0406	1.02785	1.01729	0.991848	1.03126	1.00285	1.00233	1.00164	1.01883	1.00618	1.0168	1.00029	1.0312	1.02693	1.01667	1.03262	0.984516	1.03415	1.03197	1.02877	1.02367	1.00814	1.01071	1.00692	1.00124	0.998973	1.01607	1.01816	1.0045	1.00485	1.02825	1.01583	1.00164	1.01668	1.0157	1.00808	1.01132	1.01431	1.01815	1.01893
cgp_2913	1.01457	1.03223	1.01355	0.994805	1.02564	0.992542	1.03117	1.00541	1.01809	1.01626	1.00755	1.04163	1.03619	1.0172	1.01615	1.03633	1.0027	1.02431	1.01937	1.00148	1.04275	0.998124	1.03816	1.02631	0.991571	1.00258	1.02773	1.02403	1.00357	0.994294	1.03217	1.02523	1.00873	1.01263	1.03782	1.02801	1.01296	1.01883	1.0133	1.0301
cgp_0111	1.01395	1.03222	1.00718	1.01062	1.00848	0.991428	1.01589	1.01115	1.0075	1.00392	1.03084	0.990241	1.0267	1.00416	1.0023	1.01482	1.01381	1.01751	1.03912	1.0047	1.03639	1.00199	1.02245	1.03138	0.99928	1.02013	1.01058	1.03482	1.02882	0.989579	1.02527	1.02138	1.00914	1.0196	1.00404	1.01108	0.99	1.02783	1.02841	1.02873
xylB	1.01805	1.02056	1.01381	0.996719	1.03235	1.01125	0.999265	1.00897	1.0315	1.01313	1.0166	0.992178	1.0177	1.02496	0.99302	1.01068	1.0177	1.0149	1.03671	1.02226	1.01956	1.02464	1.02774	1.04148	1.00481	1.01941	1.01236	1.00266	1.01531	0.999918	1.01607	1.03426	0.99594	0.984262	1.0101	1.02664	0.983367	1.02214	1.03054	1.01754
cgp_0029	1.02559	1.02437	1.0039	1.00024	1.01771	1.00824	1.01024	1.01513	1.02655	1.02174	1.03795	1.00245	1.02277	1.00773	0.993145	0.99579	1.02144	1.03005	1.01354	1.02852	1.00999	0.982505	1.0162	1.03133	1.00234	0.980365	1.02139	1.02317	1.02789	1.00532	1.01501	1.00247	1.01962	1.007	1.03963	1.00406	0.989546	1.01385	1.03331	1.02992
cgp_0174	1.03634	1.00759	0.995822	1.02792	1.04368	1.01538	1.0047	1.01889	1.03804	1.02279	1.04144	1.02718	1.0185	1.00839	1.02376	1.01799	1.01271	1.0396	1.02313	1.02641	1.02158	1.00855	1.04705	1.03595	1.01122	1.00439	1.02883	1.02552	1.0093	1.01495	1.02904	1.01804	1.02185	1.00428	1.02734	1.05177	1.02503	1.00774	1.02545	1.03712
tctA	1.03233	1.02974	1.00637	1.01778	1.03559	1.00688	0.996886	1.02395	1.03012	1.01417	1.05892	1.01731	1.00256	1.00895	1.02907	1.02885	1.00995	1.02184	1.0272	1.01505	1.02717	0.983493	1.01251	1.03009	1.0065	0.999784	1.01997	1.02236	1.02029	0.992686	1.01913	1.01263	1.00402	1.00641	1.02875	1.03878	1.01773	1.02993	1.02961	1.02438
bioB	1.01584	1.01854	1.00969	1.01793	1.0226	1.01225	1.00196	1.00261	1.02645	1.00984	1.02812	1.04117	1.01897	1.02753	1.01256	1.02009	1.00408	1.01283	1.03251	1.02111	1.00235	0.993945	1.02369	1.02669	1.02689	1.01578	1.01575	1.02245	1.0203	0.999777	1.01906	0.994623	1.01796	1.01245	1.02308	1.02589	1.01083	1.01722	1.02059	1.02018
citP	1.03389	1.01929	1.00494	1.01391	1.04604	1.00288	1.00435	1.01164	1.03317	1.02686	1.03662	1.01883	1.02545	1.01092	1.01395	1.02172	1.0049	1.01101	1.02945	1.00155	1.00697	0.990472	1.03082	1.03647	1.01715	1.00631	1.01435	1.01428	1.00951	1.00296	1.0167	1.00633	1.00622	0.995971	1.01972	1.02556	1.00796	1.02009	1.02525	1.01507
idhA2	1.00829	1.02497	1.00821	1.00879	1.03224	1.00274	1.01103	1.01141	1.0259	0.9891	1.01547	1.02243	1.00891	1.0155	1.00602	1.01978	1.02349	1.02546	1.0294	0.996099	1.00595	0.994589	1.02002	1.03118	0.984268	1.00978	1.02624	1.0098	1.00534	1.0071	1.02358	1.02182	1.01942	1.00759	1.02977	1.05911	1.03203	1.01581	1.02896	1.03759
cgp_0107	1.03014	1.02878	1.00079	0.999509	1.0314	1.01759	1.00274	1.04115	1.04563	1.00891	1.0037	1.03062	1.0021	0.990064	1.01438	1.01461	1.01824	1.03285	1.03272	1.02269	1.01846	0.989917	1.00961	1.01224	0.980969	1.01564	1.02793	1.0076	1.00559	0.999993	1.02964	1.01924	1.01093	1.00043	1.02142	1.03738	1.01978	1.02803	1.03312	1.01856
iolC	1.02407	1.01809	1.03155	1.01745	1.0342	1.0354	1.008	1.00419	1.02831	1.02359	1.02141	1.05307	1.00568	0.989645	1.01069	1.02683	1.02093	1.03194	1.03591	0.999477	1.0181	1.01755	1.02875	1.04028	0.978556	0.995829	1.02192	1.00749	1.00092	1.00254	1.01238	1.00842	1.01763	1.0038	1.03479	1.03097	1.0251	1.02499	1.04182	1.02524
pepO	1.02997	1.02075	1.01645	1.01005	1.05065	1.00008	1.0333	1.02067	1.04	1.0468	1.038	1.02797	1.02854	0.998382	1.00733	1.03555	1.00178	1.04053	1.04556	0.999034	0.989364	0.985361	1.01808	1.03779	1.00265	1.02376	1.00357	1.01584	1.01788	1.00665	1.00311	1.00839	1.0127	1.01181	1.01185	1.02561	1.00408	1.01416	1.02017	1.01113
cgp_3226	1.01978	1.015	1.03151	1.00067	1.03828	1.0112	1.00006	1.01412	1.02207	1.03173	1.03925	1.02763	1.04516	0.99334	1.02743	1.01385	1.00946	1.03221	1.01665	0.995486	0.977737	0.965716	1.02131	1.01113	1.00673	1.00681	1.00993	1.01176	1.01912	0.981785	1.00363	0.998879	0.995252	1.00706	1.02132	1.01802	1.01846	1.01004	1.02485	1.03059
rluC1	1.00335	1.01479	1.01789	1.00411	1.00522	1.00814	1.01019	1.01543	1.03529	1.03134	1.00477	1.01696	1.02001	1.00025	1.01299	1.03454	1.00755	1.01958	1.02947	1.00964	0.996518	0.975493	1.04872	1.01997	1.03115	1.00721	1.00854	1.03073	1.02711	1.00831	1.01403	1.04052	1.01275	0.991203	1.03702	1.03988	1.02769	1.0186	1.02884	1.02559
azlC	1.0178	1.01028	0.991238	0.99155	1.04766	1.01839	0.999583	1.00607	1.03473	0.995563	0.999009	1.02824	1.03044	0.999635	1.00365	1.02963	1.0059	1.02228	1.02514	1.01586	1.01479	0.992183	1.02962	1.022	1.02063	1.03095	1.0173	1.03809	1.03423	0.991451	1.01133	1.0318	1.02076	0.983607	1.02576	1.05077	1.03101	1.00159	1.0323	1.0068
cgp_3134	1.02977	1.00833	1.00761	1.01082	1.03619	1.0203	1.00359	1.01285	1.04248	1.00362	1.00206	1.03528	1.02565	1.0037	0.990454	1.02731	1.02364	1.02918	1.03121	1.03335	0.989331	0.99028	1.01132	1.03092	1.02194	0.995051	1.02828	1.00063	1.00678	1.01003	0.993081	0.982439	1.03007	1.01716	0.995051	1.01726	0.994692	1.01024	1.02101	1.02328
cgp_0254	1.01565	0.995133	1.00298	1.00885	1.02867	1.01261	1.00435	1.02662	1.0092	1.01122	0.998933	1.03197	1.00994	0.99227	1.00289	1.01572	0.998919	1.01533	1.01796	1.01681	1.01579	0.990483	1.01729	1.0318	1.02465	1.00732	1.00337	1.00478	1.00068	1.01881	0.988019	0.990038	1.01619	1.02716	1.01189	1.00674	0.990531	1.00502	1.0009	1.00815
cgp_0158	1.02464	1.00664	0.999253	1.01001	1.01103	1.00827	1.01683	0.990934	1.00952	0.989836	1.0169	1.03371	1.02091	0.996676	1.0019	0.994146	1.01414	0.99874	1.02678	1.01856	0.979186	0.979863	1.01879	1.01819	1.03164	0.993104	1.00806	0.99483	0.998503	0.984433	0.994485	0.98664	1.01885	1.00953	1.00978	1.00524	0.996242	1.01597	1.0195	1.01107
thiE	1.00745	0.997473	1.00117	1.00067	1.0237	1.01071	1.02403	0.998453	1.03593	1.01495	1.01572	1.04368	1.00999	0.997307	0.973032	1.04258	0.999865	1.04029	1.03728	1.02282	1.00026	1.00452	1.02131	1.00205	1.03188	0.996938	1.03328	1.0128	1.02062	1.01507	1.0118	0.999243	0.984628	0.997931	1.02393	1.03204	0.990481	1.03224	1.00921	0.994753
cgp_0139	0.978867	1.01804	1.0239	1.00746	1.03524	1.00781	1.00154	0.985554	1.0137	1.02184	1.02418	1.01911	1.01148	1.0053	0.9998	1.02404	1.03283	1.01009	1.02346	1.01609	1.01335	0.986247	1.02317	1.01319	1.01778	0.996849	1.02938	1.02493	0.994484	1.00538	1.01593	0.98837	0.998959	0.988957	1.02993	1.03603	0.991147	1.00835	1.01356	1.03626
cgp_0364	1.03393	0.996905	1.01648	1.01157	1.04423	0.994797	1.00834	1.01248	1.00881	1.01536	1.04161	1.06308	1.04168	1.03376	1.02176	1.02591	0.999049	1.02147	1.03786	1.02897	1.01316	1.00053	1.02391	1.01939	1.00031	1.02132	0.998513	1.01115	0.995486	1.00753	1.03094	1.02045	1.05296	1.02215	1.04984	1.006	0.962033	1.03308	1.01168	1.03254
cgtR9	1.02616	1.03165	1.01691	1.00856	1.02483	1.01278	0.987325	1.02138	1.02454	0.990351	1.03024	1.0541	1.04767	1.01728	0.999732	1.02723	0.988987	1.0243	1.02308	1.03024	1.01521	0.994143	1.01487	1.04139	1.02725	1.05187	1.0121	1.00064	0.994738	1.00588	1.01013	1.01664	1.07206	1.02998	1.01687	1.00636	1.02019	1.00856	1.02126	1.01772
cgp_3271	1.00634	1.02016	0.989955	1.01675	1.01929	1.00494	1.00341	0.996015	1.00937	1.02311	1.02082	0.990802	1.00189	1.03865	1.01108	0.998598	1.01456	0.999071	1.03604	1.01736	1.01903	0.98326	1.03417	1.03377	0.970575	1.01262	0.992351	0.984324	1.00874	1.015	1.02172	1.02457	1.02616	1.01797	1.01636	1.04555	1.00691	1.0002	1.03117	1.00027
pcaF	1.01116	1.01828	0.996147	1.00602	1.01749	0.995031	1.00779	1.00094	1.0143	1.02087	1.0014	0.993448	1.01686	1.03157	1.02578	1.01715	1.02444	1.01365	1.03238	1.00859	1.01301	1.00479	1.01906	1.00412	0.985978	1.01288	1.00519	0.992645	1.00279	0.992027	0.988658	1.02963	0.989916	1.01136	1.02317	1.0254	1.01196	1.01445	1.01763	1.0083
cgp_3159	1.01492	1.03573	1.04236	1.02257	1.0109	1.02154	0.993581	0.987952	1.00416	1.02276	1.04509	1.02198	0.997357	1.03193	0.980252	1.0289	1.00779	1.05008	1.02208	1.01755	1.01547	0.997852	1.02086	1.01567	0.993104	0.987966	1.03109	0.99458	1.00644	1.01212	1.0116	1.03756	1.01841	1.02133	1.02701	1.02921	1.02109	1.00607	1.01508	1.01046
cgp_0388	0.996146	1.02349	1.05702	1.02883	1.0176	1.00494	1.00248	1.02803	1.03877	1.00997	1.02863	0.986539	0.989309	1.02081	1.02896	1.02672	1.02372	1.01532	1.03617	1.02187	1.01877	1.01771	1.03386	1.06257	0.992595	0.986676	1.00167	1.01257	1.01692	1.00689	1.01124	1.02874	1.01304	1.00652	1.00997	1.0295	1.00555	1.01793	1.02479	1.03172
panB	0.976549	1.03048	1.02923	0.9958	1.02465	1.00935	0.99873	0.992858	1.03513	0.996401	1.00887	1.01553	1.00296	1.04343	1.01296	1.02186	1.01414	1.0169	1.02509	0.995986	0.991948	1.00879	1.05444	1.02876	0.996007	0.987791	0.992548	1.00495	0.993236	1.00361	1.01771	1.00242	1.00778	0.993836	1.00532	1.00719	1.02235	0.990711	1.01435	1.01905
cgp_0638	1.00124	1.04187	1.02044	1.00019	1.01098	1.03282	1.02348	0.982035	1.0194	0.990967	1.03788	1.01119	0.999916	1.00306	1.03359	1.03752	1.03284	1.01281	1.01169	0.993706	1.01803	1.01051	1.06946	1.01697	0.978972	1.00259	1.00597	1.03856	1.01971	1.01883	1.02065	1.03259	1.01768	1.01232	1.035	0.99043	1.00359	1.00464	1.01842	1.0188
cgp_3277	1.00467	1.03112	1.01447	0.997495	1.0273	1.03055	1.02554	1.00634	1.01601	0.994583	1.02158	0.995205	1.01315	1.01142	1.01756	1.03151	1.01881	1.01608	1.00585	0.986354	0.999373	1.00597	1.01675	1.04686	0.973372	0.983148	1.0217	1.00723	1.01566	0.998725	1.027	1.02144	0.988961	1.02561	1.0289	1.01697	1.00955	0.996069	1.03632	1.0203
cgp_3371	0.978902	1.00683	1.00505	0.997561	1.02053	1.02592	1.00937	0.998425	1.0302	1.02639	1.01256	1.01148	1.02618	1.05447	1.02795	0.995105	1.0027	1.0078	1.01988	1.02635	1.04367	1.02434	1.0308	1.06387	0.982469	1.00095	1.03223	1.02285	0.994192	0.992274	1.0144	1.03185	1.02249	0.995051	1.02743	1.01821	1.00429	1.04204	1.01019	1.0351
gntP	0.978437	1.01467	1.02638	1.0127	1.03153	1.01245	0.988966	1.01733	1.01133	0.980571	1.00667	1.00934	1.01913	1.03092	0.997161	1.00358	1.01121	0.995329	1.02922	1.0101	1.0455	1.03997	1.02811	1.02188	0.987259	1.02298	1.00807	1.02088	1.00681	1.00491	0.998124	1.00277	1.01139	0.986147	1.01548	1.02839	1.01607	1.02576	1.00969	1.035
glpK	1.03632	1.02639	1.01936	1.01742	1.04117	1.00721	1.02198	1.00986	1.03418	1.01862	1.02415	1.03518	1.03578	1.0346	1.01521	1.01674	1.01718	1.03279	1.02905	1.00516	1.04238	1.04291	1.02482	1.02505	1.03304	1.00673	1.02994	1.03129	1.0071	1.00774	1.02358	1.03091	1.00272	1.00024	1.03692	1.01185	1.01733	1.01918	1.02299	1.02215
proP	1.01932	1.01467	1.02427	1.01766	1.04101	1.00859	1.02102	1.02313	1.04418	1.01344	1.04556	1.01903	1.0111	1.02354	1.02284	1.00961	1.00566	1.03179	1.04764	1.02502	1.03424	1.04426	1.02778	1.04476	1.02212	1.0106	1.03247	1.01845	1.01094	1.00913	1.01754	1.00465	1.00249	1.00511	1.01631	1.02275	1.00931	1.04824	1.03003	1.01514
cgp_0207	1.0422	1.0422	1.0088	1.03084	1.03836	1.00014	1.02201	0.997164	1.02889	1.0218	1.02018	1.04704	1.03841	1.00592	1.0225	1.01169	1.02495	1.03972	1.04672	1.03094	1.03118	1.02817	1.03547	1.05393	1.00268	1.02354	1.01689	1.01475	1.01171	1.01842	1.02523	1.00728	1.00476	1.02491	1.04348	1.02853	1.0265	1.04023	1.03874	1.03667
ureC	1.01865	1.02409	1.02144	1.01538	1.0216	1.02792	0.997149	1.02395	1.01357	1.01129	1.03204	1.01019	1.01278	0.993634	1.028	1.02472	1.02206	1.03044	1.02756	1.03679	1.03225	1.02764	1.0492	1.03036	1.01914	1.02252	1.01497	1.0315	1.00924	1.01922	1.02278	1.019	1.02409	1.0166	1.04704	1.02463	1.01267	1.03394	1.02777	1.02052
hmp	1.02355	1.03258	1.00725	1.01483	1.02432	1.02679	1.02173	1.01127	1.01127	1.01798	1.01055	1.01625	1.03522	0.984362	1.00652	1.02049	1.00775	1.0235	1.04837	1.03986	1.03318	1.06121	1.00916	1.02086	1.02577	1.02082	1.00614	1.01369	1.01601	1.01447	1.01262	0.999333	1.02083	1.02266	1.03068	1.01569	1.00873	1.01574	1.01718	1.01951
cgp_0177	1.01393	1.03733	1.04614	1.01224	0.987628	1.0147	1.00806	1.01051	1.03266	1.0041	1.0435	1.01757	1.01251	1.01067	1.02487	0.97008	1.02316	1.02536	1.05269	1.03122	1.03456	1.02856	1.04913	1.03174	1.04939	0.986263	1.0328	1.00104	1.0078	1.03502	1.04038	1.01755	1.01118	1.02471	1.01547	1.01094	1.03243	1.04153	1.03501	0.998774
cgp_2578	1.01565	1.01681	0.971681	1.02186	1.02494	1.03547	1.01793	0.957843	0.997153	0.985753	1.02816	1.0217	1.01483	1.01822	0.998249	1.00425	1.01366	1.03593	1.01057	1.02766	1.04221	1.05234	1.04148	1.01533	1.02606	1.02728	1.02621	1.02509	1.02683	1.03659	1.02203	1.01581	0.99479	1.0427	0.999623	1.01989	1.00277	1.01329	1.022	1.00058
cgp_0671	0.98705	1.0264	1.03147	1.00027	1.0341	1.02647	0.972845	1.00226	0.98427	1.03021	1.03725	1.02145	0.995294	0.998146	1.00677	1.01932	1.03389	1.01067	1.05716	1.05457	1.04916	1.02003	1.04219	1.04696	1.02361	1.01765	1.02132	1.04682	1.01221	1.03525	1.01829	1.02078	0.979559	0.996915	1.04659	1.06024	0.971797	1.03593	1.01508	1.02813
cgp_1400	1.03367	1.04288	1.01101	0.981942	1.01077	1.04079	1.00492	1.03975	0.983419	0.971652	1.03256	0.992712	1.03213	0.965551	1.04384	1.04689	1.03212	1.05191	1.04996	1.03257	1.03379	1.02859	1.00051	1.02421	1.01859	0.993184	1.00733	1.01018	1.01644	1.00162	1.05201	1.05327	1.02626	1.01975	1.04778	1.01778	1.02529	1.02073	1.02696	1.0316
cgp_2365	0.998256	1.04931	1.00259	1.03237	0.975108	1.0133	0.991347	1.02641	0.960155	0.939729	1.04122	1.0298	1.0491	1.00896	1.01693	1.0403	0.996426	1.05412	1.02813	1.00659	1.01464	0.991528	1.02351	1.02564	1.02793	0.991175	1.03131	1.00947	1.03236	1.02905	1.04533	1.04487	1.04925	1.01499	1.03097	1.04537	1.00389	1.03518	1.01625	1.03151
cgp_0195	1.00471	1.04541	1.01496	1.01215	0.985461	1.02337	1.02072	1.00397	0.993218	0.961266	1.02146	1.00026	0.999387	1.02192	1.02553	1.03595	1.02712	1.05701	1.04139	1.02404	1.02109	1.00408	1.02345	1.04601	1.03816	1.02679	1.03493	1.02423	1.03145	1.02719	1.01346	1.00716	0.995493	1.03406	1.03204	1.01467	1.02737	1.03775	1.03321	1.02552
cgp_2520	1.00048	1.00586	1.01473	1.01044	0.988087	1.03323	1.02934	1.02713	0.978638	0.951497	0.999894	1.00698	0.988354	1.00786	1.01473	1.01578	1.01741	1.04942	1.05276	1.01971	1.00033	0.987443	1.00525	1.04262	1.0162	1.01244	1.00719	0.995631	1.01177	1.03998	1.03687	0.995221	1.01138	1.01006	1.04853	1.02301	1.02371	1.01731	1.00066	1.00574
cgp_0407	1.00906	1.06002	1.02043	1.03347	1.00084	1.04591	1.00756	1.0077	1.00149	1.00035	1.0365	1.01529	1.04664	1.00419	1.01745	1.03658	1.02612	1.02374	1.04833	0.99726	0.972421	0.994956	1.02923	1.03533	1.03434	0.992346	1.03159	1.02551	1.01753	1.00916	1.03362	1.00062	0.989744	0.990586	1.01835	0.967475	1.03456	1.02886	1.00566	1.03847
cgp_0187	0.999642	1.02817	0.994589	0.994694	0.999872	1.00162	0.987216	1.03173	1.029	0.988498	0.997266	1.00432	1.01513	1.0155	1.02236	1.00845	1.03872	1.07299	1.06443	0.997012	0.970642	0.973803	1.01622	1.03422	1.03198	1.00538	0.999108	1.00034	0.998844	0.998258	1.03167	1.01124	0.990668	0.978638	1.02678	1.01293	1.00458	1.02237	1.01345	1.03039
cgp_3287	1.05139	1.00308	1.00332	0.998988	1.0061	0.994093	0.979984	1.01533	1.01366	0.987608	1.01542	1.03267	1.04146	1.01408	1.00621	1.00537	0.99419	1.00988	1.02439	1.02999	1.03052	0.998153	1.01991	1.02008	1.01441	0.999859	1.00755	1.01038	1.01066	0.990963	1.00047	1.01245	1.03293	1.01731	1.01519	1.00955	1.01579	1.01141	1.01084	1.00937
cgtS9	1.03948	1.00617	1.00374	1.0087	1.01233	0.987081	0.98231	1.00589	1.02249	1.01329	1.01629	1.02119	1.01481	1.04438	1.0075	1.00536	0.988351	0.999057	1.01294	1.0352	1.01768	0.998583	1.01769	1.01419	1.02446	0.978631	1.00884	1.01469	1.01233	0.981162	1.0051	1.01429	1.01397	1.00181	1.00441	1.03802	1.00301	1.01205	1.01384	1.0138
cgp_3281	1.03654	1.01373	1.02144	1.00479	1.02094	0.989482	0.990265	1.00369	1.0364	1.00873	1.04606	1.02677	1.05137	1.02013	1.01665	1.01853	0.991255	1.00243	1.02172	1.02826	1.03089	1.00235	1.03634	1.03813	1.03272	0.996699	1.01906	1.02912	1.00704	0.98016	1.02305	1.02822	1.04035	1.02486	1.02658	1.04965	1.00993	1.03385	1.02917	1.02777
cgp_2683	1.01224	0.992344	1.00906	0.998299	1.01552	0.989156	1.02782	1.02548	1.01478	0.999736	1.02321	1.04587	1.0525	1.04159	1.0009	0.995295	0.972874	1.01091	0.996809	1.04273	1.01329	1.00248	1.03112	1.02192	1.02108	0.976644	0.993716	1.01894	1.00288	0.993784	1.00946	1.00567	0.989003	1.04479	1.03136	1.01569	1.02696	1.00574	1.01734	1.01141
cgp_2794	1.00686	1.01194	0.992831	0.998235	0.984885	0.992243	1.00276	0.972218	1.01817	0.980725	1.03138	1.0503	1.04525	1.01374	1.0262	0.999072	1.00117	1.0191	1.02504	1.03533	1.00061	1.00664	1.03528	0.997037	0.983075	0.972253	1.01995	1.02393	1.00389	1.01532	1.00889	1.0287	0.997902	1.00648	1.03509	1.05484	0.987337	1.03425	1.01783	1.04234
moaB	1.03162	1.02051	0.978189	0.959261	1.0107	0.992999	1.00948	1.02944	1.00851	0.968462	1.02857	1.05112	1.03329	1.06757	1.0324	1.02436	0.96846	1.00913	1.00986	1.02987	1.02245	1.01651	1.01464	1.02201	0.982846	0.97665	1.02787	1.00633	0.976405	0.983464	1.0449	1.02626	1.00909	0.992083	1.01186	1.04992	0.980735	0.994332	1.01372	1.00797
cgp_3295	1.02481	1.02746	1.00591	0.990542	1.02315	0.988583	0.97841	0.999175	1.02188	0.980587	1.01298	1.03906	1.02566	1.04117	1.01164	1.00578	0.985177	1.02412	1.02471	1.01436	1.01365	1.00295	1.01583	1.02255	1.01577	0.995869	0.998039	1.01437	0.988326	0.972059	1.01983	1.02012	1.0243	1.0098	1.01988	1.0281	0.995177	1.02081	1.02562	1.01747
cgp_3280	1.00076	1.01638	0.994744	0.987361	1.02531	1.00062	0.984284	0.992556	1.0073	0.992049	1.01392	1.02697	0.996109	1.02126	1.00991	1.00749	0.978941	1.02776	1.02076	1.03259	1.00962	0.999031	1.00908	1.02736	1.00184	0.977613	0.994557	1.0047	0.993573	0.97573	1.00124	0.994976	1.00481	1.00341	1.01765	1.03088	0.987091	1.00816	1.00946	1.01287
cgp_3291	1.02119	1.03847	1.00586	0.989818	1.01097	0.996841	0.997326	1.00378	1.0254	0.948707	1.05304	1.0353	1.00787	0.99774	1.00108	1.01332	0.96103	1.04318	1.05068	1.02646	1.02086	1.00749	1.02694	1.01623	1.00694	0.977595	0.999547	1.01622	0.999797	0.974662	1.02449	1.00972	0.979615	1.00385	1.00876	1.01545	1.02581	1.0193	1.04882	1.01648
maa	0.99255	1.01354	0.993819	1.00221	1.02272	1.00464	0.980135	0.998405	1.02565	0.973561	1.0387	1.00785	1.01958	1.00198	1.02435	1.02219	1.00284	1.04315	1.0356	0.999152	1.02269	1.02687	1.00641	1.03528	1.00828	0.978241	1.01111	1.02405	1.01115	0.990558	1.02356	1.00335	0.969569	0.985877	1.05363	1.04965	1.02018	1.01347	1.03235	1.04064
cgp_0228	1.01986	0.981345	0.960091	1.02053	1.0061	0.981249	0.982779	0.994532	1.01928	0.989627	1.06579	1.03886	0.999379	1.00824	1.01238	0.993925	0.975361	1.02146	1.03975	1.06799	0.984202	0.985334	1.02947	1.03625	1.03682	1.01144	1.02429	1.0283	0.973727	1.0499	1.04959	1.00158	0.995572	1.00205	1.0118	1.05784	0.962051	1.02778	1.00944	1.03624
cgp_2443	1.09581	1.04069	1.00509	0.998438	1.03159	0.991983	0.972602	1.01161	1.06071	0.995582	1.04032	1.06597	1.05867	1.0447	0.996635	1.00045	0.985671	1.02806	1.00789	1.00211	1.01597	1.0471	1.01563	0.99344	1.01135	1.00085	0.991352	0.98866	1.0282	1.02761	1.05763	1.03157	1.03127	1.03763	1.0851	1.06163	1.03426	1.00359	1.02976	1.01858
cgp_3176	1.05743	0.998163	1.03263	1.04154	1.06112	1.01752	0.977018	1.07309	1.0531	1.03029	1.02506	1.04562	0.981145	1.01243	0.989077	0.995764	0.998401	1.04797	1.03721	0.981608	0.985257	0.998077	1.03694	0.994246	0.987703	1.03192	1.05751	0.990558	1.01671	1.02868	1.05752	1.05032	0.969681	1.00769	1.04242	1.0367	1.04226	0.990561	1.03097	1.01691
cgp_1840	1.03122	1.00971	1.01167	0.978407	0.96949	1.0197	0.971681	1.02258	0.972863	1.01667	1.01174	1.06045	1.00652	1.01661	1.03386	1.03044	0.961809	1.00001	1.03732	1.06069	1.04429	1.05884	0.997731	0.970928	1.00576	1.01977	1.0256	1.01785	1.02118	1.03553	1.02737	1.04603	1.05659	1.03207	0.99588	1.00638	1.02641	0.982244	0.995484	0.977918
galE	1.04013	1.01688	0.981069	0.964881	0.983011	0.997214	0.968669	1.01152	1.00677	1.00181	1.04524	1.01457	0.9444	0.968486	1.02022	0.972224	0.96738	1.04822	1.0262	1.06098	1.01825	0.986745	1.00615	1.00077	0.994088	1.03624	1.0675	1.0433	1.00904	1.02082	1.04322	1.00933	1.03416	1.02999	1.04451	1.02567	1.0129	0.969445	1.00864	1.00086
cgp_3269	1.08998	1.00001	0.98705	0.964967	1.02562	0.970221	0.981855	0.978366	0.977145	1.01765	0.976405	1.02623	1.00099	1.00347	1.01166	1.00036	1.00117	1.0162	1.03175	1.04116	1.00762	1.00935	0.978954	1.00126	1.01857	1.0073	1.02276	1.00937	0.966757	0.971986	0.995522	0.992763	1.02432	1.02283	1.02492	1.0224	1.03208	1.04363	1.03292	1.00606
iolE	1.00662	1.03198	1.01978	1.00806	1.03163	1.01311	1.02724	1.03014	1.04106	1.02947	1.04789	1.00146	1.04942	1.03404	1.01734	1.04102	1.02707	1.019	1.04416	1.01597	1.04173	1.01756	1.04009	1.03979	1.02691	1.02766	1.02602	1.03087	1.00434	1.0211	1.04351	1.01887	1.02032	1.01073	1.03252	1.03444	1.02122	1.03388	1.03427	1.03545
cgp_0025	1.00719	1.01601	1.02142	1.0149	1.03543	1.02732	1.02751	1.02316	1.03399	1.03939	1.04602	1.02218	1.01306	1.02981	1.00567	1.03801	1.00892	1.01882	1.03179	0.991749	1.01706	0.997033	1.02353	1.04676	0.999154	1.01211	1.01006	1.0244	1.02289	1.02267	1.03704	1.01821	0.997956	1.01083	1.03706	1.02739	1.02189	1.03074	1.03874	1.04286
cgp_2941	1.01206	1.03044	1.0287	1.00801	1.04625	1.02392	1.03759	1.0241	1.04392	1.00481	1.0508	0.992343	1.02202	1.04262	1.01632	1.02244	1.02065	1.02447	1.00623	1.00398	1.01497	1.02179	1.03859	1.02852	1.00527	1.02211	1.00418	1.01647	0.997237	1.01066	1.04364	1.0455	1.01706	1.01018	1.04166	1.02382	1.02092	1.02697	1.00408	1.02203
arsC1	0.9984	1.0225	1.03557	1.0134	1.03522	1.02633	1.0159	1.01768	1.01584	1.01735	1.00676	0.991422	1.02659	1.05364	1.0109	1.02354	1.03396	1.02291	1.03133	0.981686	1.03527	1.01134	1.03672	1.03498	1.00599	0.988843	1.02749	1.01808	1.00612	1.01949	1.0319	1.03269	1.00497	1.0082	1.02934	1.03664	1.03729	1.02775	1.01332	1.03328
cgp_0469	1.00908	1.03115	1.03903	1.02318	1.04634	1.00806	1.01641	1.0273	1.02806	1.04357	1.02833	1.03698	1.04334	1.05127	1.0257	1.03244	1.02586	1.02816	1.04035	1.02005	1.0053	0.993655	1.05405	1.04562	1.02236	1.03915	1.01951	1.02465	1.0346	1.03515	1.02249	1.05313	1.03608	1.02894	1.03662	1.0359	1.03883	1.02873	1.03548	1.03933
cgp_3106	1.00394	1.05291	1.03322	1.01768	1.04455	1.03094	1.0193	1.03732	1.03119	1.01541	1.01892	1.03256	1.04384	1.02996	1.03151	1.02498	1.03137	1.01898	1.02914	1.00293	1.00215	0.997233	1.01608	1.04356	1.00827	1.01552	1.0313	1.03003	1.02332	1.01356	1.01842	1.03339	1.01482	1.01422	1.04542	1.01721	1.05933	1.0298	1.03527	1.0358
cgp_0127	1.00273	1.04427	1.03494	0.997818	1.02757	1.01878	1.00704	0.992674	1.02743	1.01281	1.02982	1.03667	1.03181	1.0528	1.02526	1.01293	1.00912	1.00481	1.02785	0.990714	1.00162	0.988618	1.04539	1.0694	1.02185	1.01636	1.00232	1.02659	1.01529	1.04032	1.02247	1.02601	1.04248	1.02958	1.02381	1.0231	1.03911	1.02663	1.01999	1.02867
hde	1.02247	0.99136	1.03163	1.00445	1.00256	1	1.0286	1.03268	1.03614	1.00247	1.00382	1.04343	1.06032	1.02493	1.01318	1.00946	1.02047	1.03897	1.01606	1.00379	1.01079	0.995318	1.02652	1.03173	1.00089	1.01825	1.00308	1.02736	1.02468	1.03295	1.01897	1.02764	1.02961	1.01086	1.03086	1.01946	1.03393	1.01239	1.02954	1.02068
cgp_2242	1.01672	0.999714	1.02954	1.02537	1.03255	1.01099	1.00844	1.0443	0.993151	1.02115	1.00158	1.03109	1.03426	1.01387	1.01912	1.01608	1.00184	1.02941	1.00881	1.0231	1.03034	0.995689	1.00932	1.02081	1.00123	1.02675	1.02361	1.01383	1.01887	1.0261	1.00873	1.02891	1.02108	1.03121	1.0439	1.02991	1.04407	1.0012	0.998945	1.02559
lysR2	1.01704	0.972105	1.03033	1.03455	1.02935	0.9974	1.02029	1.00591	1.01432	1.02283	1.01827	1.03147	1.01992	1.0127	0.984847	1.02011	1.00525	1.0116	1.03817	1.01328	1.02376	1.02328	1.02532	1.04759	1.0138	1.01104	1.02468	1.01451	1.02765	1.00433	1.02944	1.0289	1.02702	1.01324	1.0198	1.04772	1.03262	1.03054	1.02418	1.0251
arsX	0.984974	1.00711	1.02973	0.971428	1.02239	0.982743	1.00909	1.02218	1.02369	1.02583	1.05576	1.03464	1.04228	1.02607	1.02039	1.00823	1.03153	1.02619	1.01637	0.991157	1.035	1.00583	1.00288	1.03931	1.01942	0.996665	1.02963	1.03333	1.02168	1.00786	1.03064	1.03643	1.01504	0.995274	1.03689	0.996369	1.06853	1.02623	1.02395	1.03901
lip3	1.02811	1.06253	1.04266	1.02202	1.03742	1.04182	1.01154	1.03361	1.03166	1.02738	1.03575	1.03045	1.02085	1.01488	1.01712	1.04317	1.00317	1.03134	1.02108	1.03169	1.0355	1.00377	1.01741	0.992255	1.04024	1.00672	1.0279	1.02633	1.01402	0.999055	1.03885	1.03565	1.03882	1.01918	1.02927	1.0469	1.06101	1.00727	1.021	1.02204
cgp_1839	1.02571	1.03999	1.02968	1.02598	1.03484	1.03731	1.03018	1.02457	1.032	1.03456	1.01329	0.993417	1.02753	1.01474	1.02222	1.03124	1.00828	1.04008	1.03897	1.033	1.02895	1.01069	1.01629	0.993494	1.02429	1.02234	1.04734	1.02361	1.02302	1.01108	1.03342	1.04751	1.023	1.02649	1.05994	1.0379	1.04901	1.01861	1.01023	1.01221
cgp_1590	1.04538	1.04389	1.05404	1.0083	1.05208	1.02779	1.03838	1.02301	1.03373	1.02819	1.01733	1.01981	1.02023	1.02872	1.04372	1.04462	1.00392	1.02186	1.0418	1.04102	1.0293	0.983736	1.02359	1.02822	1.03867	1.01078	1.04271	1.03262	1.00769	1.02415	1.03158	1.05944	1.03121	1.01997	1.0151	1.03201	1.06395	1.04029	1.02934	1.01633
cgp_0526	1.0675	1.03567	1.01907	1.0054	1.04252	1.01921	1.02345	1.00323	1.02656	1.04106	0.999355	1.00157	1.01746	1.03045	1.00988	1.0203	1.02598	1.03915	1.02372	1.04484	1.04274	1.01917	1.02143	0.999247	1.05813	1.00684	1.02299	1.03161	1.01221	0.998827	1.00103	1.02771	1.01828	1.01835	1.02746	1.02249	1.03573	1.04672	1.03136	1.03339
cgp_1219	1.03733	1.03381	1.02881	1.02073	1.02474	1.02301	1.02988	1.02163	1.03812	1.0227	0.999293	1.02057	1.01506	1.02749	1.03544	1.02941	1.00291	1.01995	1.0176	1.04089	1.03436	1.04288	1.03564	1.01459	1.03085	0.991426	1.02917	1.05703	0.992678	1.01532	1.03013	1.0221	1.01272	1.01974	1.00334	1.02793	1.04562	1.01392	1.02272	1.0052
cgp_0287	1.03119	1.02189	1.01671	1.03927	1.03165	1.0243	1.02746	0.998596	1.02358	1.03602	1.03535	1.06042	1.0453	1.05698	1.00751	1.0138	1.03419	1.02589	1.02621	1.0152	1.03936	1.01182	1.04014	1.02193	0.999808	1.0202	1.02352	1.01719	1.01896	1.00951	1.02005	1.03761	0.987498	1.02253	1.00983	1.02488	1.03654	1.02383	1.0255	1.02923
cgp_0525	1.01543	1.00625	1.02002	1.0344	1.04582	1.02963	1.01685	1.03904	1.03201	1.04303	1.02643	1.05428	1.04974	1.0469	1.01177	1.02877	1.01618	1.03619	1.03869	1.02691	1.04213	1.0146	1.04052	1.03034	1.00771	1.00579	0.999903	0.989542	1.02201	1.0152	1.01493	1.04356	1.00598	1.01192	1.00629	1.02526	1.01363	1.02333	1.01433	1.03168
dadA	1.03377	1.01383	1.0314	1.00415	1.04007	1.02703	1.02786	1.01583	1.03992	1.03599	1.0178	1.02744	1.03784	1.08927	1.019	1.02787	1.02792	1.0223	1.05324	1.02188	1.03185	1.02541	1.04188	1.02671	1.02128	1.03382	1.01021	1.01635	1.01495	1.02269	1.03064	1.0283	1.03572	1.01217	1.03962	1.03511	1.00735	1.02615	1.04241	1.03231
ohr	1.00683	1.02736	1.01811	1.00325	1.03399	1.00371	1.02373	1.0247	1.01974	1.03675	1.05575	1.01511	1.02323	1.04074	1.0105	1.02521	1.03449	1.02339	1.05672	1.03969	1.03941	0.999711	1.04573	1.06525	1.02306	0.982463	1.03445	1.02403	1.02551	1.02343	1.03906	1.01661	1.01622	1.02658	1.01293	1.03851	1.03296	1.03492	1.03624	1.02125
ssuR	1.0383	1.02556	1.03163	1.02129	1.03225	1.01083	1.00495	1.0207	1.03452	1.06604	1.04699	1.026	1.00448	1.04848	0.991963	1.00664	1.01893	1.03873	1.02641	1.04291	1.05586	1.01716	1.03394	1.03506	0.992993	1.01618	1.02948	1.03721	1.01776	1.00132	1.03684	1.02212	1.02012	1.01871	1.00517	1.0494	1.01354	1.02184	1.02956	1.02735
cgp_3319	1.00654	1.04448	1.03464	1.03633	1.01389	1.03364	1.01806	1.01524	1.03468	1.05258	1.04875	1.03184	1.00577	1.05828	1.03036	1.03026	1.05953	1.02361	1.05073	1.02621	1.06203	1.07033	1.035	1.04825	0.992926	1.02087	1.02504	1.0186	1.03121	1.0098	1.02359	1.02458	1.01181	1.02129	1.05149	1.04112	1.00738	1.02215	1.01909	1.02007
cgp_3396	1.00424	1.04818	1.00328	1.02231	1.04169	1.04213	1.02019	1.01771	1.03332	1.0178	1.04051	1.00119	0.993041	1.03762	1.03787	1.03489	1.0184	1.03531	1.06011	1.02374	1.01915	1.04734	1.02669	1.05224	1.02863	1.0125	1.02962	1.02537	1.03026	1.01775	1.04543	1.02868	1.01878	1.03424	1.05244	1.04176	1.02761	1.02386	1.04034	1.03303
lldR	1.06259	1.03792	0.99285	1.00984	1.03514	1.02257	1.03785	1.03103	1.01172	1.0156	1.01738	1.05067	1.00521	1.03839	1.03482	1.01321	1.03192	1.03901	1.02973	1.03796	1.0523	1.03583	1.04297	1.07554	1.0242	1.01163	1.03159	1.03805	1.00822	0.993989	1.02437	1.02168	1.03386	1.01433	1.03598	1.04647	1.05629	1.01307	1.04915	1.00488
cgp_2861	1.04568	1.01101	1.00706	1.02328	1.03711	1.00449	1.00848	1.02172	1.00494	0.999282	1.02267	1.05549	1.00779	1.03739	1.02801	1.0196	1.00367	1.02682	1.0572	1.03106	1.0393	1.0509	1.03241	1.03705	0.979559	0.991263	1.01914	1.03017	1.00724	1.03746	1.00897	1.01343	1.03087	0.998611	1.0525	1.04831	1.01431	1.04847	1.02874	1.0221
cgp_0072	1.0473	1.01939	1.00482	1.05217	1.03123	1.0146	1.03061	1.0053	1.02496	1.02119	1.04134	1.07144	1.00665	1.07112	1.00563	1.01568	1.02029	1.05214	1.03909	0.985689	1.0495	1.00246	1.01907	1.05117	1.01652	1.01063	1.04903	1.00638	1.04371	0.990409	1.02216	1.04929	1.03838	1.04555	1.01183	1.02978	1.05571	1.0435	1.03331	1.02353
cgp_1418	1.03297	0.988486	1.01436	0.989716	1.06595	0.974101	1.0265	1.01114	1.0538	1.03998	1.00989	1.0453	1.04048	1.07305	1.03054	1.02655	1.02677	1.04634	1.03785	0.994352	1.02961	1.02372	1.05475	1.03339	1.05144	1.05815	1.05813	1.05243	1.01147	1.01161	1.02277	1.05049	1.0095	1.03368	1.05585	1.05838	1.05311	1.05592	1.04309	1.01805
crnT	1.00358	1.00789	1.0482	1.00859	1.08243	1.02299	0.988683	1.04219	1.0542	0.991786	1.02134	1.00144	1.0175	1.05823	1.02842	1.03075	1.0309	1.0337	1.04058	0.998061	1.02551	1.01998	1.0528	1.03831	1.01147	1.04705	1.03429	1.03471	0.992364	1.02672	1.01693	0.990478	1.01911	1.02272	1.0211	1.0098	1.08455	1.06114	1.03856	1.02059
cgp_3221	1.05001	1.05244	1.02573	1.00612	1.02883	1.01654	1.00482	0.991913	1.02073	1.01929	1.03617	1.02771	1.03168	1.01545	1.02274	1.03293	1.02853	1.00798	1.02559	1.02799	1.03581	1.01827	1.02074	1.0424	1.00543	0.994529	1.02266	1.02883	1.00844	0.994581	1.01844	1.03131	1.02635	1.02462	1.04144	1.03888	1.06095	1.0191	1.01659	1.03989
cgp_0466	1.03169	1.03332	1.00125	1.00538	1.00949	1.00851	1.00403	1.02516	1.01587	0.994319	1.0057	1.02684	1.04653	1.03088	1.02239	1.04734	1.03158	1.0297	1.04598	1.02465	1.03425	1.01447	1.02276	1.02588	1.01148	1.01446	1.00732	1.00907	0.995842	0.966199	0.998996	1.01161	1.01452	1.00273	1.04481	1.03089	1.04265	1.03552	1.03097	1.02156
cgp_3273	1.02489	1.02084	1.00063	1.00963	1.03448	0.985284	0.981333	0.996003	1.04831	0.984469	1.03778	1.03738	1.03893	1.02632	1.02004	1.04051	0.996108	1.03669	1.05273	1.02509	1.04106	0.99379	1.00608	1.03043	1.02716	1.00263	1.02568	1.03999	1.00216	0.981618	1.03358	1.04095	1.00273	0.985722	1.02338	1.03252	1.03313	1.03399	1.03361	1.01639
cgp_3267	1.03239	1.0215	0.994102	0.999972	1.02543	0.992741	0.986222	0.999977	1.02656	1.00983	1.02073	1.06151	1.03141	1.02576	1.0265	1.02803	0.99223	1.03544	1.02925	1.03315	1.03028	1.00942	1.02022	1.01766	1.02754	0.991708	1.02652	1.01722	0.988322	0.984867	1.0376	1.02984	1.00782	0.997285	1.01721	1.03935	1.00136	1.02504	1.02731	1.02963
moaE	1.0537	1.03234	0.995365	1.00157	1.04146	0.998498	1.00168	0.994414	1.04824	1.01236	1.05252	0.994651	1.04184	1.04465	1.02161	1.04702	0.980585	1.04012	1.01919	1.06243	1.02266	1.00849	1.05603	1.03253	1.01461	1.02775	1.02251	1.0067	0.966046	0.996365	1.04349	1.03842	1.03975	1.02775	1.04391	1.03432	1.06168	1.05141	1.0384	1.01991
cgp_1092	0.995112	1.03771	1.03058	1.00851	1.02118	0.952684	1.02503	1.03217	1.01155	1.02533	1.03593	1.03619	0.979925	0.996342	1.02714	1.06705	1.02359	1.04474	1.02171	1.04873	1.0282	1.0122	1.07551	0.999605	1.05031	1.0063	1.01504	1.03978	1.01714	0.990999	1.04028	1.04727	1.01032	0.998794	1.00884	1.05445	1.05783	1.05524	1.02205	1.014
cgp_1160	1.05708	1.01059	1.02711	1.00162	1.03706	0.959832	1.06009	1.02108	1.02835	1.04375	0.976282	0.989883	0.998015	1.04338	1.05177	1.02301	1.02443	1.02923	1.05856	0.996151	1.04901	1.01954	1.06326	0.992298	0.992867	1.0465	1.00767	1.00282	0.982118	1.00003	1.02448	1.07382	1.00954	1.02642	1.01834	1.02895	1.08971	0.99421	1.0484	1.0361
purF	1.03013	1.02067	1.02415	1.02711	1.03492	1.02255	1.02596	1.00348	1.02068	0.953015	1.02441	0.990152	1.08257	0.96364	1.02334	1.03213	1.00833	1.03121	1.06233	1.03741	1.06563	1.06293	1.01352	1.00886	1.02616	1.01466	1.01483	1.00694	0.991177	1.04378	0.986889	0.983144	1.03622	1.03115	1.02275	1.02516	1.03663	1.01866	1.01197	0.992655
purK	1.04588	0.994855	1.01094	0.99551	1.02698	1.02727	1.03379	1.0193	1.00785	0.996216	0.995588	1.01063	1.07931	0.997372	1.03686	1.02551	0.979928	1.04004	1.02016	1.01124	1.05037	1.07941	1.00667	0.9767	1.00652	0.990018	0.999744	1.01851	1.00553	1.02783	0.991203	0.972679	1.00757	1.00625	1.02339	1.04123	1.01985	1.02669	1.03133	0.994407
mtr	1.05288	1.00756	1.04704	1.06981	1.04259	1.05158	1.06494	1.02178	1.01828	0.979659	1.02589	1.03504	1.05753	1.00894	1.02221	1.00288	0.982654	1.01573	1.02596	1.03142	1.02381	1.0457	1.03461	1.04946	0.997376	1.10083	1.02359	1.04799	0.998722	1.03957	0.997056	0.960206	1.01522	1.02916	1.0219	1.03091	1.02334	1.03621	1.00822	1.02099
hisE	1.04049	1.09817	1.03536	1.03865	0.998582	1.02144	1.05814	1.07209	1.01641	0.983093	1.01995	0.973546	1.0497	1.06241	1.05832	1.01649	1.01656	1.06091	0.994888	1.01846	0.981136	1.02888	0.987213	0.995033	1.06829	1.07093	1.01481	1.01421	1.00567	1.04914	1.03376	1.05321	1.01787	1.02862	1.05201	0.995145	1.01875	1.00558	1.03015	1.02822
cgp_1663	1.05396	1.0852	1.0143	1.0463	1.04027	1.0274	1.02006	1.06091	1.04655	1.02269	1.00644	0.982839	0.984478	1.02944	1.05732	1.01693	1.00806	1.02603	1.03657	0.985133	1.00114	0.981457	0.986679	0.972341	1.00379	1.05475	1.03916	1.00347	0.954902	0.990067	1.0094	1.04037	1.0115	1.01579	1.06036	1.04881	1.01737	1.01768	1.0167	0.983692
cgp_1330	0.98507	1.04228	1.07476	1.07463	1.02171	1.03837	1.04574	1.06059	1.00235	0.994418	1.03214	0.978292	1.00448	0.997605	1.05643	1.03389	1.02036	1.02145	1.02349	1.03175	0.998586	1.03722	0.930093	0.965071	1.00943	1.00995	1.02069	1.02677	1.00917	1.05391	0.981444	1.06137	1.04515	1.01494	1.01857	1.02955	0.98648	0.974173	1.01204	1.04385
cgp_2286	0.972677	0.974474	1.05492	1.06709	0.974351	1.01202	1.02949	1.04207	1.00038	0.993299	1.05412	1.03507	1.04761	0.961674	1.0056	1.05836	1.02887	1.00626	1.02651	1.00269	1.02883	1.00166	0.970539	1.01064	0.985447	1.05857	1.03611	1.04966	1.0236	0.994037	1.02732	1.02129	0.987594	1.02439	0.979248	1.06516	1.0237	0.961829	1.02309	1.01885
arr	1.02502	0.961861	1.07103	1.05313	1.01012	1.04402	1.01392	1.02299	1.03615	0.963736	1.00887	0.990123	1.06177	0.997008	0.975235	1.03233	1.05605	0.993373	1.09965	1.02582	1.09074	1.00753	0.923001	1.0472	0.959426	0.986103	1.02124	1.03579	1.03229	1.00342	1.01894	1.04088	0.997635	1.02177	1.06444	0.99316	0.97438	0.994313	1.03114	1.05111
cgp_0218	1.00156	0.964364	1.01627	1.02302	1.00089	1.05374	1.00646	1.04425	1.02819	0.960855	1.0107	1.01416	1.03369	1.03009	1.02267	1.02806	1.0494	1.01882	1.01556	1.01894	1.00586	0.983675	0.912014	1.01149	1.00196	0.945361	1.04238	1.03827	1.04048	1.00598	0.992765	1.01223	1.03352	0.981463	0.998865	0.991651	1.00204	1.02776	1.00951	1.01371
cgp_0217	1.04262	1.02353	1.06383	1.07377	1.04507	1.04392	1.04997	1.0498	0.959972	1.05939	1.08163	0.996759	0.998562	1.00037	1.02793	1.01806	1.00908	1.06733	1.11735	1.06235	0.988423	1.01493	0.973304	1.05104	1.01371	0.96816	1.01154	1.06383	1.01486	0.94278	1.0307	1.0147	1.06749	1.01448	1.0168	0.976274	0.99817	1.01658	0.982367	1.00684
cgp_1317	1.02863	0.997542	1.02719	1.03768	1.05983	1.02229	1.05332	1.03955	1.04874	1.03552	1.00062	0.988642	1.05088	0.980892	1.01593	1.02605	1.01245	1.00898	1.02948	1.05903	1.02445	1.03459	1.04804	1.0345	0.989238	0.895537	1.03978	1.01131	1.02649	1.04266	1.05294	1.08474	1.04916	1.03242	1.04515	1.01378	1.0222	1.03067	1.0224	1.02295
cgp_1316	1.01051	1.01803	1.01159	1.01103	1.05281	1.02574	1.04366	1.04036	1.02543	0.999106	1.00273	1.00284	1.04057	0.954538	1.01701	1.01199	1.00987	1.00249	1.01099	1.01935	1.01969	1.01371	1.019	1.00391	1.01994	0.890016	1.02436	1.02357	1.0193	1.0106	1.04621	1.05307	1.01556	1.00965	1.02887	1.02581	1.03147	1.03188	1.00975	1.00521
cgp_1484	1.03384	1.02421	1.04234	1.0442	0.971273	1.04543	0.977893	0.986459	1.02496	1.01213	0.998788	0.993349	1.02086	1.02806	1.0139	1.01756	1.02876	1.00787	1.03236	1.0369	1.02796	0.962905	1.02694	0.995194	1.00859	0.949307	1.0194	1.01859	0.968322	0.992772	1.00988	1.05689	1.02101	1.01241	1.02812	1.00448	1.04543	1.04255	1.01057	1.02259
cgp_1619	1.0492	0.976374	1.04192	1.04928	0.987062	1.04717	1.02651	1.04395	1.04513	1.00531	0.984937	0.905314	1.0543	0.973181	0.997953	0.990061	1.01643	0.998209	0.999986	1.03381	1.01587	0.97205	0.994231	0.975853	0.972358	0.971548	1.01468	1.0226	0.974556	0.994223	1.00255	1.00646	1.03685	1.03789	0.999491	0.985631	1.03058	0.992773	0.990572	1.03657
cgp_0715	0.968226	1.00235	1.0045	1.00215	1.01662	1.00344	0.987035	1.01079	1.06872	1.09143	1.14632	1.00227	1.08857	1.09971	0.969702	1.00853	1.05376	1.1305	1.10376	0.982469	0.993128	0.989629	0.987804	1.00059	1.0173	1.02761	1.02763	1.02599	0.992636	0.998973	1.00888	1.01839	0.948408	0.975076	1.00147	1.0503	1.04043	1.02231	1.03144	1.0496
cgp_2903	0.981673	1.00782	1.00416	1.00728	1.05963	1.02951	1.01823	1.0034	1.06624	1.06239	1.06834	1.0533	1.02504	1.09695	0.987953	1.03992	1.05221	1.0541	1.0716	0.996406	0.937044	0.994946	1.05551	1.00648	1.00101	1.01017	1.01597	0.989078	0.983707	0.952688	1.01348	1.03776	0.946783	0.994884	1.01829	1.01685	1.04381	1.00783	1.03255	1.02345
cgp_3325	1.01014	1.04297	1.0372	1.05917	1.05326	1.03862	1.00112	1.02067	1.06399	1.0774	1.0733	0.984299	1.06054	1.18134	1.02126	0.991746	1.01721	1.05641	1.063	1.03455	1.05523	1.05402	1.03777	1.07128	1.01403	0.998775	1.02236	1.02913	1.00275	1.00548	1.00306	1.02158	0.98608	1.00026	1.02709	1.01197	1.05324	0.99423	1.03389	1.02151
cgp_2719	1.02591	1.02146	1.02807	1.02583	0.957076	1.02638	1.02717	1.0191	0.966987	0.98588	1.11566	1.03909	1.05956	1.1117	1.03059	1.01867	0.999817	1.09937	1.07778	1.05161	0.929344	0.913376	1.02339	1.04843	0.991357	0.900542	1.00304	0.99403	1.01966	1.00002	1.01244	1.02822	1.0241	0.996257	0.965261	1.00121	1.04877	0.960954	0.96846	0.99342
uraA	1.03361	1.0171	1.00446	0.901226	0.983442	0.985165	0.960392	0.969332	1.03702	1.08746	1.03082	1.03975	1.05538	0.926056	1.01969	0.961907	0.944516	1.00188	0.99159	1.05714	1.03161	0.993953	0.990584	0.93701	1.05064	1.02876	1.02248	1.01519	0.992223	1.04885	1.02563	1.00213	1.04931	1.04977	0.985134	0.972527	0.999222	0.976091	0.995039	0.977235
xseA	1.0104	1.01255	0.9651	0.864091	1.00037	0.947966	0.925266	0.960417	0.991365	0.992711	1.02786	0.980212	1.00489	0.96501	1.00684	0.976681	0.979265	1.00426	1.00058	0.983403	0.995825	0.99817	0.970859	0.997172	1.0065	0.979193	1.00205	1.01966	1.00183	1.02337	1.01001	0.966766	1.00573	1.0265	0.996851	1.0066	0.99136	0.994468	0.982697	1.00346
cgp_1597	1.01099	1.00129	1.00705	0.929245	0.97513	1.00681	0.970505	1.01347	1.00418	1.04983	0.927549	1.05304	0.977154	0.987755	1.01735	0.95343	1.00718	1.08449	1.01234	1.05478	0.967272	0.948426	0.965411	1.02759	1.04877	1.04109	1.01545	1.07221	1.00474	1.02656	1.01529	0.958983	1.0285	1.04917	1.02465	1.03706	0.977695	0.97332	1.04193	1.016
cgp_1402	1.02587	1.0584	0.967175	0.875063	1.02417	0.958772	0.919118	0.977865	1.04311	0.984856	1.03777	1.03527	1.04679	1.05813	1.0495	0.992606	0.978056	1.04072	1.05108	1.05659	1.02336	1.03017	1.02215	0.979565	1.034	1.00568	1.02998	1.04189	1.02294	1.02301	1.07773	1.0901	1.06002	1.05941	1.04096	1.02514	1.03282	0.986821	1.02227	1.017
cgp_2505	1.00612	1.03542	0.971027	0.954413	1.01229	0.969146	0.885257	1.02957	0.972299	1.02349	1.05163	0.980256	0.964236	1.01819	0.952157	1.02937	0.981724	1.05826	0.978545	0.987255	1.02904	1.01663	1.06301	1.04295	0.990819	1.02136	1.03046	0.955907	0.99488	1.0382	1.03969	1.02197	1.07662	1.04871	0.982419	1.02569	1.06679	0.977588	1.02088	1.00323
cgp_3212	0.993473	0.937791	1.05972	1.03128	1.0583	1.04534	1.03002	1.05401	1.05343	0.947071	1.03519	1.07114	1.01159	1.05221	1.01432	0.980325	1.04271	1.0194	1.01011	0.926471	0.96197	0.963931	1.08547	0.987801	0.980485	1.06528	0.98813	1.01617	1.0493	1.04639	1.05141	1.04238	0.97605	1.01426	0.966295	1.0466	0.982707	1.02393	1.04182	1.03194
cgp_1244	0.984017	1.00757	1.029	1.0227	1.02287	1.05053	1.05366	0.991775	1.03123	0.969908	1.0634	1.02358	0.930838	1.00261	0.966516	0.972978	1.01721	0.990682	1.00711	0.941123	1.00605	0.985911	1.07943	0.878131	0.996825	1.00989	0.994591	1.00422	1.06035	1.05071	0.990405	1.03024	0.956586	0.997072	0.976643	1.05204	1.04414	0.995056	1.00214	1.01297
cgp_0222	1.01353	0.965542	0.993896	1.0226	1.00446	1.06928	1.05766	1.04941	1.02755	1.08374	1.03394	1.0296	1.05613	1.01242	1.02259	0.992866	0.967527	0.910753	1.03832	0.997127	1.06854	0.968228	1.05242	0.984067	0.947692	1.02048	1.0631	1.0102	1.10156	1.08129	1.03731	1.01881	0.937303	0.901278	0.965323	1.02716	0.928831	0.961274	0.97586	1.00535
cgp_0220	1.11068	0.945532	0.962944	1.04884	1.01555	1.06514	1.06172	1.06699	1.07604	1.05618	1.05382	1.00496	1.04887	0.97062	1.01128	0.99729	1.0352	1.06161	1.03768	1.06077	1.02187	1.05842	1.10545	0.952792	1.04805	0.923577	0.981639	1.01269	1.10553	1.02897	1.01628	1.04549	1.02797	1.02739	1.06237	1.1052	0.938009	0.966696	1.03239	1.05498
nrdR	1.02277	1.09859	1.04643	0.987909	0.968353	1.07418	1.02754	1.05094	0.98338	0.945765	1.07556	0.971543	0.960615	0.814746	1.062	1.0375	1.07127	1.09671	1.0835	0.984366	0.993187	1.00158	0.965587	0.977326	1.09105	1.04981	1.08456	1.06622	1.06074	1.08912	1.07761	1.02608	1.0752	1.05203	1.07396	1.03312	1.09752	1.03021	1.04969	1.05072
cgp_2583	0.995361	0.987745	0.970051	1.05696	1.00626	1.03516	1.03714	1.09548	1.07659	1.01599	1.12537	0.951539	1.07253	0.944774	1.06795	1.12085	0.999546	1.0729	0.995554	1.00291	1.08027	0.982678	0.878383	1.03187	0.988226	0.983414	1.05672	1.027	1.0455	1.02878	0.953674	1.02057	1.05979	1.02491	1.04836	1.03165	1.09631	1.03883	1.01261	1.0114
ptsX'	1.05716	1.00986	1.06301	1.01716	0.988827	1.05653	0.975708	1.09455	1.01122	1.01927	1.20939	1.13147	1.01613	0.998753	1.08452	0.992465	0.986271	1.06941	1.0939	1.10589	1.05875	1.08593	1.04259	0.974175	0.950229	1.09599	1.04682	0.995123	1.09541	1.06127	1.03463	1.00155	1.04044	1.01751	1.05961	0.968382	1.08241	0.990298	0.997728	1.00641
cgp_2892	0.855404	1.09528	1.0305	1.0347	1.02336	1.11509	0.928581	0.985416	1.09032	1.09602	1.0409	0.998572	1.0801	0.91864	1.1193	1.01648	1.02265	1.08121	0.999639	1.12621	0.932447	0.989663	1.08379	0.969171	1.01666	1.01831	1.08336	1.01616	1.07606	1.08219	1.00791	0.975354	1.0178	1.05144	1.09508	1.14367	0.982035	0.955081	1.04767	1.01557
wbpC	1.02929	1.02564	0.978288	0.947393	0.960002	0.971993	0.928044	0.997247	0.959496	0.951015	1.03482	1.03762	1.03677	1.0549	1.03394	1.12141	1.13869	1.24789	1.21867	1.00101	0.981484	0.974795	1.02611	0.988942	1.02355	1.03674	1.04003	1.05694	1.03278	1.02498	1.017	1.01637	1.0122	1.00984	1.01239	0.989965	0.985394	1.01554	0.996694	1.01612
cgp_2390	1.01476	0.988188	1.00887	0.955964	0.966514	1.02864	1.00848	1.02683	0.991374	1.00978	0.974234	1.02363	0.966275	1.10256	1.01697	1.09483	1.11616	1.10573	1.09311	1.09359	1.01307	1.03394	0.985066	0.908952	1.03648	1.03233	1.0373	1.02506	1.02893	1.04421	1.00809	0.991389	1.05144	1.02063	1.00399	0.993574	1.05025	0.995819	0.989282	0.995628
cgp_0954	1.01308	0.974102	0.941206	0.867809	0.813071	0.952724	0.851255	0.976823	1.05297	1.20075	0.957567	0.952126	0.983113	1.07855	1.01319	1.06347	1.10118	1.12551	1.11259	1.01326	0.960234	0.970781	1.0137	1.03291	1.01499	0.994143	1.00452	0.992988	0.990285	1.02846	0.985838	1.03616	1.0253	1.00336	0.983797	1.02514	1.05427	1.00078	0.98221	0.996745
cgp_2673	1.01073	1.00131	1.02007	1.0105	1.00891	1.0075	1.00759	0.996566	1.01363	0.978919	1.01011	1.00501	1.02606	1.01363	1.00546	1.01143	0.993496	1.00749	1.00853	1.02208	1.01258	0.98421	1.01852	1.01031	1.01511	0.997534	1.00345	1.0126	0.978756	1.01	1.01729	1.01381	0.995088	1.00002	1.00422	1.01814	1.01845	1.01745	1.00672	1.00328
cgp_2649	1.02531	1.00478	1.01615	1.0217	1.00557	1.00898	1.01418	1.01775	1.00855	0.988671	1.01161	0.978654	1.00855	1.02849	0.9876	1.02207	1.00899	1.01487	1.01243	1.025	1.01362	0.980662	1.0201	0.987811	1.01612	0.993742	0.995304	1.01146	0.990285	1.00419	1.00538	1.01288	0.995609	1.0096	1.01578	1.00459	1.00562	1.01223	0.999653	0.990838
aceA	1.0053	1.00849	1.00938	1.02337	1.00779	1.01523	1.00918	1.00346	1.02017	0.993449	0.999085	0.982582	1.00669	1.03303	1.00834	0.997716	1.0049	1.01949	1.02579	1.01537	0.995238	0.974574	1.01064	1.00057	0.994835	1.01275	0.988245	1.00303	0.992177	1.01047	1.01693	1.00834	0.995392	1.00524	0.991927	1.0331	1.00954	1.00051	1.00836	0.998367
nanP	0.993134	0.995781	1.02322	1.00323	1.02441	0.991379	0.998436	1.01676	1.01851	1.01688	0.993898	0.98339	1.0175	1.02644	1.00515	1.00723	1.00444	1.01719	1.01051	1.01594	0.995371	1.00358	1.00696	1.01022	1.01211	1.00207	0.988521	1.00738	1.00424	1.00592	1.00245	1.00719	1.00703	1.0182	1.02346	1.01744	1.0248	0.999828	1.01371	1.00039
cgp_3374	1.01041	1.00768	1.01112	0.999192	1.01569	0.99974	0.986247	1.01605	1.01763	1.0011	1.01528	1.00732	1.022	1.02794	0.990736	1.00043	1.00048	1.00689	1.02435	0.997531	0.992895	0.997245	1.00051	0.988272	0.998559	1.00399	1.00512	1.01443	0.991155	0.991721	0.996219	1.00691	0.99691	0.994553	1.00955	1.01394	1.01331	1.00627	1.00191	0.998704
chrA	0.9878	1.01262	0.996976	0.999075	1.00889	1.00888	0.986095	1.00629	1.01362	0.981765	0.994186	0.996189	1.00156	1.04344	1.00619	1.02798	1.00491	0.989237	1.0085	1.00274	1.00725	0.991546	1.02266	1.01087	0.9986	1.00704	1.00501	1.01449	1.01357	1.00068	1.02358	1.01236	0.988592	1.01138	1.00543	1.01254	1.02312	0.999908	1.01297	1.00704
mgtE2	1.01789	0.996913	1.00292	0.986124	1.01084	1.01087	0.999132	1.00146	1.01314	1.00509	1.00431	0.990248	0.999692	1.03042	1.01436	1.01522	0.991949	0.995422	1.02583	0.9849	1.00805	0.995661	1.01899	1.02132	0.998153	0.996766	0.995595	1.01317	1.00204	1.01156	0.995483	1.01545	0.994522	1.00371	0.994975	0.995508	1.01361	1.01305	0.994839	1.00951
cgp_1086	1.00245	1.00932	1.02406	0.99797	1.01949	1.01646	1.01921	0.998782	1.01338	0.998135	0.975398	1.00844	1.00336	0.99172	1.00205	1.01353	1.01443	1.02312	1.01185	1.0058	1.02384	0.981885	0.994894	0.991677	1.00362	1.01264	1.01683	0.988597	0.99846	1.00165	0.999369	1.01252	0.989762	0.995697	1.02901	1.02096	1.01848	1.02117	1.00194	1.01602
bglS	1.0045	0.999651	1.00416	1.00256	1.01471	1.01775	0.992352	0.99447	1.00099	1.00242	0.982105	1.0144	1.00711	0.991862	0.996356	1.00868	1.00864	1.0092	1.01037	1.0086	1.00649	0.995353	0.996156	1.01721	0.991034	1.01063	0.998465	0.989559	1.01521	0.995868	0.984689	1.01726	1.00375	0.996601	1.02297	1.00972	1.004	1.00408	1.00936	1.01193
fpr2	1.01428	1.01708	1.00833	1.00964	1.01118	1.01089	1.00483	0.991668	1.03424	1.01522	0.994407	1.00476	1.0063	0.998134	1.00429	1.01261	1.01047	1.01444	1.01888	0.99964	1.00331	0.98072	0.991606	1.0168	1.00066	0.990764	1.01135	1.02246	1.01167	0.985429	1.0153	1.00685	1.00867	1.00089	1.02025	1.02634	1.03501	1.00705	1.01707	1.02118
cgp_0133	0.998654	0.988794	0.999204	1.0048	1.00942	1.02568	1.01789	1.00227	1.01994	0.993708	0.997589	0.992461	1.01595	0.983754	1.00551	0.994329	0.996976	1.013	1.01377	0.997118	1.0272	1.00782	1.00953	1.02064	1.02335	0.992927	1.00115	1.0234	1.00461	1.02096	1.00654	1.00821	0.988578	0.989564	1.00844	0.992129	1.02103	1.0188	1.01249	1.00919
cgp_3218	1.01308	1.00707	1.00576	1.00596	1.01326	1.02006	1.01038	1.01715	1.01796	0.986371	1.00983	0.995253	1.00475	1.02145	1.01001	1.00891	1.01325	1.00229	1.01127	1.00439	0.991977	0.996987	1.00821	1.02398	0.999274	1.01728	1.00302	1.02067	1.01572	1.00143	1.0111	1.02256	1.01213	1.00616	1.01078	1.00486	1.02344	1.00033	1.00787	1.0117
cgp_0778	1.00094	1.00327	1.00451	1.00563	1.0158	1.00713	1.00095	1.0071	1.01352	1.00834	1.00637	0.999474	0.997873	1.0067	1.02329	1.01813	0.999646	1.01698	1.00205	1.00127	0.99237	0.999573	0.986482	1.00398	0.996783	0.996046	0.998191	1.02446	1.01093	0.997531	1.02468	1.01666	1.00263	1.00091	1.01097	1.00489	1.01296	0.999354	1.00507	1.00521
lcoP	1.01443	1.0062	1.01907	1.00972	1.01029	1.02788	1.00529	1.01401	1.00647	1.00649	1.00663	1.00443	1.00445	0.996098	1.01644	1.01066	1.01934	1.0033	1.00401	0.993287	0.989792	0.969429	1.00557	1.01184	0.993186	1.00685	0.99614	1.01022	0.990853	1.00503	1.0071	1.00902	0.998729	0.991695	0.998418	1.0048	0.99406	1.00967	1.00236	1.01128
pstA	1.00463	0.997266	1.00494	1.00184	1.01185	1.02295	0.991266	1.00015	1.00641	1.00125	1.00189	1.01904	0.977303	1.0127	1.0052	1.02188	1.01212	1.02373	1.03251	1.0051	1.0097	0.984475	1.01688	1.02176	0.987422	1.0048	0.997797	1.00164	1.01497	0.99232	1.01047	1.02018	1.00165	0.977196	1.00791	1.02053	1.00618	1.00701	1.01256	1.00604
cgp_0272	0.980509	0.995707	0.998707	1.0014	1.01167	1.01226	1.00267	1.02366	0.99987	0.998456	1.0082	1.00474	0.989227	1.00702	1.02177	1.02408	1.01095	1.01619	1.0038	0.989089	1.00968	0.985426	1.01006	1.02104	0.986714	0.993588	1.00935	0.99543	1.00815	0.994652	1.00899	1.02913	1.01765	0.994594	1.02082	1.01313	1.00891	1.00487	1.0169	1.02518
cgp_0018	1.02053	1.01827	1.00633	1.00593	1.00534	1.01031	1.01021	1.01758	1.01327	1.02534	1.01198	0.965927	0.989116	0.99592	1.01293	1.01544	1.01709	1.00702	1.00588	0.998797	1.00718	0.981026	1.01511	1.00803	0.991817	1.01036	1.0058	1.01903	1.01611	1.01232	1.01375	0.99865	1.01616	1.00356	0.979957	1.01228	1.01746	1.00872	1.01716	1.00986
cgp_0120	0.981108	1.01175	1.01476	1.01714	1.01878	1.02692	1.01558	1.00465	1.01159	1.01272	1.02027	0.967853	0.977227	1.01419	1.01822	1.01472	1.00921	1.01342	1.01387	0.997694	0.988181	1.00299	1.01984	1.00433	0.991239	1.02213	1.008	1.01486	0.99481	1.00297	1.00753	1.01609	0.983826	0.991101	1.00617	1.01627	1.01657	1.01863	1.00402	1.01689
citB	1.00802	1.00683	1.01786	1.00275	1.02443	1.00267	1.00233	0.99925	1.01356	1.01644	0.984855	0.984951	0.99725	0.986893	0.993398	1.01086	0.997618	1.00608	1.01132	1.00453	0.990089	0.998213	1.01699	1.02134	0.990282	1.01873	0.995957	1.00927	1.02556	0.98963	1.01816	1.00336	0.993335	0.99183	1.02013	1.00548	1.00361	1.03141	1.01037	0.995017
cgp_0662	1.02532	1.01292	1.02342	1.01083	1.02314	1.0115	1.01911	1.01622	1.00654	1.00422	1.02803	0.997001	0.995353	1.03507	1.01555	1.0107	1.01731	1.016	1.00386	0.979225	1.01472	1.00494	1.0213	1.02044	0.994433	1.01004	1.00048	1.01004	1.00797	1.01267	1.01264	1.02008	1.00584	1.0166	1.00646	1.00847	1.00448	1.02615	1.01499	1.0138
cgp_3339	1.02784	1.01365	1.00735	1.00951	1.02036	1.00746	0.998234	1.00452	1.01657	1.01326	1.01118	0.989542	1.00242	1.02064	1.01517	1.02204	1.0192	1.015	1.02288	1.00176	1.01053	0.985422	1.01644	1.0043	0.989825	0.995692	1.00283	1.01609	1.00968	1.00744	1.01383	1.02582	1.02413	0.988482	1.03056	1.02185	0.999306	1.02446	1.01341	1.03565
cgp_2999	1.00155	1.0138	1.00667	1.00972	1.0207	1.008	1.01601	1.01246	1.00669	1.01246	1.00488	1.00281	1.03751	1.00752	1.01287	1.01238	1.02121	1.0104	1.0139	1.00396	1.0051	1.00752	0.997144	1.00602	1.00314	1.00339	1.00988	1.00453	1.012	1.00075	1.02146	1.0248	0.997641	0.999857	1.0185	1.0232	1.01353	1.00807	1.02153	1.01749
cgp_2890	1.01035	1.02619	1.0054	1.0177	1.01795	1.00968	1.01913	1.02207	1.0095	1.00963	1.00618	0.986622	1.0239	0.99798	1.02306	1.02647	1.02879	1.00895	1.01221	0.982538	1.01645	1.00152	0.989315	1.0182	0.997	1.00568	1.00715	1.01749	1.01477	1.00975	1.01235	1.02546	1.00575	1.00782	1.00793	1.01693	0.985939	1.00105	1.01849	1.01745
cgp_3341	1.00259	1.01225	0.998614	1.01434	1.01841	1.0053	1.01759	1.02687	1.01616	0.996453	1.00142	1.02031	0.999578	1.01038	1.00155	1.01275	1.02793	1.00539	1.01913	0.982592	1.02063	0.999611	1.01551	1.02406	1.00808	1.02233	1.01044	1.02622	1.01272	1.0203	1.01696	1.01467	1.01832	1.0053	1.0264	1.01529	0.99394	1.00793	1.02407	1.02023
cgp_0464	1.01551	1.01651	1.00131	1.0086	1.01905	1.01907	1.00277	1.01227	1.01869	0.993772	0.991932	1.00255	0.993354	1.01117	0.991625	0.998417	1.01	1.01165	0.999301	1.00274	1.00333	0.998879	1.01301	1.0059	1.02799	1.02437	1.00327	1.00436	1.00329	0.986563	1.01	1.0132	1.00351	1.01358	1.01694	1.03541	0.98935	1.00549	1.01135	1.01383
moeA1	1.02624	1.01974	1.00181	1.00837	1.00709	0.999586	1.00002	1.01468	1.0138	1.00165	1.0024	0.980725	1.00104	1.02195	1.00769	0.994759	1.0059	1.01822	1.01749	0.996856	0.996856	1.00505	1.01995	0.995424	1.02947	0.990137	1.00324	1.00447	0.999239	0.993427	1.01599	1.02026	1.03312	0.994076	1.0096	1.02794	0.974351	1.00866	0.999207	1.01048
cgp_2895	0.989256	1.0299	1.0296	1.01383	1.01403	0.993076	1.00219	1.01449	1.01343	0.968002	1.00145	1.02678	0.995833	1.00184	1.02454	0.99073	1.02737	0.992332	0.999425	1.0022	1.02645	0.99358	1.04161	1.0055	0.982914	1.01179	1.01706	1.02539	1.0041	1.00045	1.00217	1.01786	1.00656	1.01009	0.994916	0.99644	0.983074	1.02066	1.01567	1.0027
lmrB	0.986141	1.02221	1.02437	1.01273	1.01309	0.994449	1.01032	1.00333	1.01233	0.994357	1.00542	0.987697	1.01209	1.00283	1.017	0.986299	1.01844	0.991617	1.00108	1.01251	1.02116	1.00734	1.00057	1.01772	0.979207	0.99062	1.00112	0.999027	1.02919	0.995253	1.0226	1.01237	1.00622	0.995039	0.982544	0.97687	0.993048	1.01011	1.0054	1.01584
cgp_1150	1.02074	1.02608	1.03393	1.01691	1.02824	1.0197	1.00271	1.00083	1.01963	0.955293	1.00142	1.00692	1.00197	1.0163	1.02219	1.01227	1.01336	1.00155	1.01913	1.00617	1.03049	1.00822	0.988872	0.999047	1.00391	1.02027	0.991731	1.01815	0.990992	1.01461	1.01551	1.02144	1.01695	1.00424	1.02603	0.972156	1.00104	1.01149	1.01986	0.994524
gabD3	1.00379	1.01481	1.00586	1.0067	1.00365	1.00183	1.01147	1.00789	1.01129	1.00477	1.03148	0.986604	1.00561	1.00387	1.00929	1.01979	1.01237	1.01418	1.01883	1.00136	0.988964	0.975095	1.0072	1.012	0.997654	1.00336	1.01695	1.01694	1.02547	0.997135	1.00652	1.0036	1.00156	0.98452	1.02733	1.01656	1.00318	1.01229	1.00996	1.00524
cgp_2566	0.986232	1.00317	1.0059	0.99843	1.00664	1.01473	1.02284	1.03536	1.00127	0.988714	1.0258	0.982064	0.999029	0.98816	1.00168	1.00774	0.999727	1.00627	0.998217	1.01506	0.993204	0.98696	1.0079	1.00337	1.01677	0.998948	1.00642	0.998925	1.00677	1.00304	0.997557	1.01468	0.992978	0.98513	1.01318	1.0217	1.0054	1.00758	1.0131	1.01092
cmt4	0.995518	0.993473	1.00035	1.01234	0.999188	1.01551	1.01215	1.01816	1.00887	0.998059	1.03218	1.02887	1.01395	0.990273	1.01967	0.998194	1.00977	1.02743	1.00539	0.986712	0.990324	0.981012	1.01313	0.999803	1.01304	0.992762	1.02394	1.00252	1.00037	1.02125	1.01079	1.02397	1.02659	0.998806	1.02513	1.01011	1.00498	1.0031	1.02135	1.01006
cgp_0365	1.03585	1.00856	1.00542	1.02256	1.00679	1.0149	0.997647	1.01234	1.0001	0.98783	1.02051	0.99914	1.00096	0.975985	0.99763	1.01564	0.992907	1.00032	1.00384	1.00526	0.977829	0.979495	1.02306	1.02335	1.00778	1.00431	0.99341	1.00342	1.01597	1.0029	1.01276	1.00456	0.996012	1.02147	1.01189	0.984211	0.993306	1.00172	1.02189	1.00235
cgp_0087	1.01056	1.01409	0.995618	1.01176	1.01043	1.00068	1.01147	1.01403	1.0162	1.00442	1.03107	0.987979	0.989518	0.952324	0.994521	1.00128	1.00757	1.00735	1.00456	1.00322	0.978043	0.987427	1.01097	1.01503	1.02315	0.9941	0.999513	1.00072	1.01858	1.002	1.016	1.00002	1.00777	0.998928	1.02198	0.992697	0.988935	1.01746	1.01007	0.999596
catA3	1.01057	1.01753	1.00593	1.0222	1.01641	1.01887	1.01857	1.01028	1.02658	1.02961	1.0357	0.996421	0.994303	1.01544	0.981063	0.986468	1.00116	1.01148	1.01234	0.991738	0.999061	0.978477	1.00365	1.02502	1.01479	1.01459	1.00984	0.993231	0.999863	0.996321	0.990308	1.01172	1.00888	0.998697	1.01027	1.01312	1.03235	1.00948	1.03247	1.00127
cgp_0565	1.00829	1.00476	1.00826	1.0279	1.02157	0.99807	1.01589	1.02392	1.01165	1.02673	1.00985	1.0224	0.990897	0.98784	0.983912	0.986988	0.992371	1.0061	0.993872	1.01841	1.01512	0.98473	1.00347	1.00415	0.989637	0.991856	0.999073	0.999864	1.0005	0.993468	0.990094	1.0095	1.01349	1.01396	0.9985	1.01612	1.01813	1.00835	1.0071	1.00278
cgp_1207	0.992875	1.02432	1.01109	1.00883	1.03047	1.00619	1.02046	1.02354	1.01991	0.986003	1.01702	0.967045	0.997346	1.00994	1.0106	1.00393	1.00347	1.004	0.999665	1.01781	0.99128	0.933522	0.995972	1.02018	0.986664	1.00468	1.0053	0.999819	0.983922	0.999162	1.00644	0.995723	1.01201	1.01653	1.01019	1.0054	1.01026	1.01237	1.00137	1.00873
cgp_3397	0.988988	0.983271	1.02593	1.03484	1.00882	1.01122	1.04948	1.01674	1.0013	0.972091	1.00255	0.986899	0.986645	1.00291	0.99355	0.996967	1.0219	1.01281	1.00221	1.00418	1.00219	0.967167	1.01226	0.999908	0.969142	1.01805	1.00963	0.999671	1.00364	1.0246	1.00454	0.99176	1.03261	1.01238	1.00216	0.983441	1.00766	0.997159	0.995317	0.984926
cgp_2705	0.991562	1.00676	1.00907	1.01619	1.01215	1.02547	1.02051	1.0128	1.00285	0.992395	1.0019	1.0075	0.996756	1.02908	1.01287	0.999186	1.00827	1.04149	1.03459	0.989749	1.00964	1.01438	1.00996	1.00921	1.00156	1.00313	0.998297	1.00267	1.01475	1.01025	1.02342	1.02428	1.01152	0.992834	1.02232	1.02461	0.984365	0.996012	1.0159	1.01318
cgp_0052	0.980261	1.02022	1.01274	1.00688	1.01658	1.01314	0.99483	1.01088	1.02218	0.982934	0.984701	0.986663	1.01625	1.00904	0.999319	1.00675	1.03463	1.01662	1.02301	1.00737	1.01777	1.00148	1.0031	1.03327	1.00038	1.00913	1.01377	0.999476	1.00474	1.00557	1.022	1.01227	0.999874	0.994517	1.03572	1.02569	0.970016	1.01054	1.01514	0.996547
cgp_0420	0.972742	1.01904	1.03894	1.03131	0.99297	1.03516	1.02154	1.03255	1.01437	0.976342	0.998355	0.983222	1.00294	1.00939	1.01824	1.00412	1.02346	1.00805	1.01972	0.995989	1.00631	1.00557	0.99703	1.02102	1.00243	1.02413	1.0104	0.99375	1.01519	0.996699	0.991336	1.01683	1.01564	0.996093	1.02542	1.02379	0.99351	1.016	1.01855	1.0226
cgp_2956	0.96618	0.983127	1.02204	1.02427	1.00802	1.02517	1.00839	1.02082	1.01985	1.00019	0.977174	0.975963	0.989701	1.00199	1.01457	0.993199	1.0316	1.0201	1.03046	1.00817	0.996476	0.985287	1.00767	1.01455	1.01413	1.01059	0.988271	1.0008	1.01178	1.0257	1.02122	1.01243	0.989864	0.998666	1.02349	1.00091	0.990433	1.00929	1.00427	1.00213
nagR	0.984064	1.01691	1.01245	1.01208	1.00367	1.00945	1.01824	1.01183	1.00701	1.00314	1.0014	1.01959	1.0022	0.996294	1.00036	0.996035	1.00417	1.00785	1.01949	0.964704	1.00142	0.9829	1.00179	1.00069	0.977522	1.00746	1.01119	0.987126	1.03089	1.01015	0.993357	1.01125	1.01822	0.991735	1.03962	1.03345	0.987567	1.01316	1.01349	1.00729
cgp_0051	0.968457	1.00773	1.0075	1.0015	0.994578	1.01329	1.00122	1.01123	0.989534	0.992957	1.01716	1.01765	0.987236	1.00279	0.999897	0.994465	1.00033	1.01357	1.00762	0.993606	1.00161	0.972773	1.00874	1.03897	0.959131	0.997159	0.994165	1.00889	0.991875	1.00831	0.989538	1.02517	1.00141	0.972835	1.01963	0.990257	0.981421	1.01392	1.02118	1.00088
cgp_3233	0.988522	1.03745	1.02011	1.02509	1.0084	1.02678	1.03167	1.00719	1.02884	1.0027	1.02368	0.977454	0.964753	0.992036	1.01963	1.05346	1.02124	1.02836	1.0245	0.984133	0.994826	0.981215	1.02591	1.01235	1.00655	1.02124	1.01426	1.02819	0.99289	1.00443	1.02105	1.00968	1.00571	0.988563	1.03304	1.03302	0.957508	1.00831	1.01569	1.00913
leuD	1.01328	0.993559	1.00879	1.02284	1.00962	1.03318	1.02458	1.00663	1.00203	1.00644	1.00131	1.00009	0.971352	0.941416	1.03284	1.02732	1.01104	0.999771	0.992439	1.00479	1.00626	0.987731	0.996161	1.00403	1.02376	0.9882	1.0064	1.00804	0.992237	1.02668	1.01147	1.03096	0.989739	1.00646	1.02606	1.03892	0.961137	1.00583	0.99133	1.00384
cgp_3403	0.955034	1.01197	0.991899	1.00789	1.00875	1.00511	1.01165	0.993856	1.03095	0.993008	1.02724	1.0275	1.01941	1.04248	1.01124	1.00551	1.02032	1.01126	1.01311	1.0055	1.01687	0.999957	1.01698	1.01184	1.0024	0.990896	0.986578	1.00799	0.992569	0.991483	0.996411	1.01356	0.996921	1.00135	1.01758	1.00539	0.955559	1.01896	1.014	1.01928
cgp_2803	0.963309	0.990078	1.0126	0.971751	0.997938	0.970724	1.00806	1.01423	1.02716	1.02164	1.03332	1.02043	1.01619	1.03178	0.993697	1.01271	1.00472	1.009	1.01375	1.00087	1.00997	0.985195	1.00939	1.00233	1.00238	0.999001	0.998312	0.99534	1.00038	0.988057	1.01726	1.02105	0.994441	1.01472	1.00886	1.03083	0.973422	1.00323	1.02343	1.00429
cgp_3136	0.969335	1.02717	1.02228	0.997454	1.03998	1.00249	1.00313	1.01992	1.01281	0.969367	1.02109	1.00758	1.0421	1.00538	0.997113	1.00871	1.01094	1.00072	1.0146	0.994649	1.00772	0.976534	1.01115	1.00465	1.01968	0.975279	0.967986	1.00292	0.991023	0.998526	1.00068	1.02323	0.999509	1.00408	1.00072	1.03095	0.985007	1.00209	0.998945	1.00324
cgp_3043	0.969074	1.01964	1.0041	0.99765	1.03254	0.990865	1.01708	1.00524	1.01859	1.00061	1.0267	1.03758	0.982458	1.00569	1.00564	1.02912	0.998165	0.998764	1.00951	1.01952	1.02147	0.973942	0.975741	1.00711	1.02625	0.961684	1.0183	1.01739	1.00358	1.0176	1.00274	1.02434	0.96618	1.00113	1.00421	0.985387	1.00435	0.973532	1.02788	0.998624
cgp_3128	0.990396	1.02864	1.03465	1.00076	1.0151	1.01759	1.00705	1.03922	1.03704	1.00872	1.04125	1.00577	1.01388	1.03243	1.03672	1.02613	1.02482	1.00256	1.01632	1.01189	1.00928	0.976867	0.993562	1.03213	1.01787	1.00922	1.0202	1.03551	0.979851	1.04296	1.01723	1.01493	1.03875	1.0123	1.04756	1.02837	0.975476	0.993735	1.03752	1.02574
cgp_2364	0.977368	1.02462	1.04497	1.0217	1.00524	1.02782	0.996774	1.01556	1.01498	0.994535	1.00507	1.01558	1.03641	1.0425	1.01667	1.00162	1.00385	0.977337	0.99865	0.99359	0.97478	0.983071	0.997838	1.00983	1.01339	1.01055	1.01959	1.01527	0.988482	1.02155	0.989026	0.990508	1.01333	1.02458	1.03202	0.985904	0.985858	0.986255	1.01563	1.00254
cgp_0397	1.00098	1.01274	1.00257	1.01892	1.01329	1.01658	1.01927	1.01163	1.02131	1.0119	1.01603	1.00097	1.0321	1.00127	1.00178	1.01733	1.02234	1.01	1.02172	1.01687	1.01468	0.982725	1.0126	1.01478	1.02622	1.01221	1.00904	1.01273	0.999669	1.00683	1.01591	1.00645	0.99057	1.00248	1.00913	1.02981	1.01786	1.0132	1.00634	1.02274
cgp_2939	1.00013	1.00585	1.01227	1.00148	1.02315	1.01816	1.00665	1.00934	1.01307	0.997542	1.00495	1.00742	1.03207	1.00376	1.00634	1.02925	1.02668	1.02361	1.0243	1.00648	1.00456	0.987263	1.02023	0.997548	1.00277	1.01774	1.00581	0.995958	1.00374	1.00982	1.00254	1.02581	0.987327	1.0046	1.00277	1.00392	1.04059	1.01288	1.01716	1.01053
guaB1	1.00573	1.02289	1.02241	0.987174	1.00759	1.01433	0.997459	1.00377	1.01367	1.01751	0.990518	1.00903	1.00984	1.00809	1.00905	1.02631	1.00337	1.00551	1.01607	1.01477	1.00407	0.988776	1.02855	0.999908	1.01631	1.02482	1.0053	1.00407	0.999595	0.992056	1.01731	1.02966	1.00814	1.0084	1.00671	1.02305	1.02716	1.00584	1.00018	1.00717
cgp_0390	1.00593	1.0219	1.01223	1.00817	1.02228	1.02289	1.01361	1.00295	1.0222	1.0282	1.00548	1.00966	1.02297	0.977698	1.00217	1.01207	1.01161	1.03056	1.01525	1.02168	1.00707	0.994738	1.0316	1.02018	1.00067	1.01147	1.00401	1.01392	0.9783	1.01127	1.02066	1.01766	1.00208	1.00363	1.03873	1.01582	1.01933	1.02283	1.02034	1.03002
cgp_2285	1.01865	1.0224	1.02233	1.00707	1.00912	1.00563	1.00383	1.01492	0.99459	0.993783	1.01706	1.01562	1.029	0.996383	1.03395	1.01177	1.01126	1.0231	1.0243	1.02603	1.00236	1.00838	1.01197	1.03112	0.987127	0.982889	1.01657	1.00361	0.990202	1.01519	1.0185	1.02039	1.01117	0.989279	1.00155	0.997667	1.01907	1.0058	1.01893	1.01063
cgp_0026	1.01581	1.00169	1.01953	0.985397	1.02472	1.02629	0.996213	1.02467	1.02424	1.01974	0.997784	0.995384	1.02174	1.00169	0.998519	1.02012	1.02062	1.0283	1.006	1.03638	1.00992	0.999472	1.00548	1.03416	0.986846	1.01466	1.0062	0.992585	0.98067	1.01313	1.0033	1.00652	1.00301	0.991554	0.999201	0.993713	1.0056	1.00499	1.01566	1.02218
cgp_3380	1.01438	0.989446	1.03522	0.989493	1.01759	1.01064	1.01729	0.983585	1.01557	1.00687	0.99577	1.00657	1.00929	1.00158	1.01625	1.02256	1.01463	1.02543	1.0222	1.03082	1.01544	0.976073	0.989608	1.00061	1.00907	1.00559	1.00274	1.01927	1.01552	1.01432	1.00629	1.01388	1.03784	0.994595	1.0171	0.990789	1.02363	1.01307	1.01825	1.03356
cgp_0672	1.00591	0.986893	1.02171	1.01739	1.0251	0.998204	1.01123	0.998358	1.01131	1.01391	0.969864	1.00375	1.0239	1.01195	1.01493	1.00938	1.02332	1.02807	0.993993	1.01898	0.988596	1.0022	1.02602	0.9846	1.01856	1.01915	0.997497	1.00789	1.01383	0.995608	1.0396	1.03293	1.03087	1.02304	1.00711	0.991576	1.02593	1.01749	1.02058	1.0142
cgp_2434	0.993276	0.974832	1.01701	0.99579	1.01222	1.0258	0.9961	1.00096	0.995286	0.996893	0.968098	1.01904	1.00986	1.0106	1.02442	1.02903	1.01738	1.01249	1.00408	1.00813	0.996353	0.997275	1.03092	1.01357	0.98319	1.029	1.00586	0.996355	1.01998	1.02741	1.0194	1.01879	1.0217	1.02194	1.00987	1.02069	1.03945	0.99208	1.00591	1.02161
gapX	1.01861	0.98866	1.01278	1.00231	1.01535	1.01841	1.01243	1.01985	1.01149	0.986386	0.997629	1.00144	1.02155	0.999142	1.01164	1.02563	1.00805	1.02934	1.01773	1.01946	1.0042	0.98832	1.00661	1.01835	1.03048	1.01127	1.00651	1.02071	1.02706	1.01273	1.02474	1.02067	1.01564	1.00847	0.998173	0.999906	1.01071	1.00079	0.99906	1.01431
metP	1.02882	1.01118	1.02964	1.0092	1.0134	1.01533	1.01068	1.02436	1.00525	0.999614	1.00761	0.985865	1.01724	0.985411	1.01975	1.013	1.01471	1.01645	1.01904	1.01962	0.98838	0.997624	1.0145	1.01789	1.01307	1.01276	1.00589	1.01954	1.01566	1.0197	1.00981	1.0012	1.01334	1.00057	1.01223	1.02165	1.00734	1.00799	1.00868	1.00177
cgp_2188	1.03052	1.01405	1.0047	1.00806	1.0153	1.01613	1.03132	1.03662	1.01502	1.01427	0.976372	1.00525	1.01491	0.976541	1.01306	1.00995	1.00807	1.0307	1.00371	1.03682	1.00132	0.982789	1.02495	1.00882	1.02893	1.00142	1.00703	1.00265	1.01293	1.01057	1.02158	1.02132	1.00714	1.0032	1.0196	1.01192	1.02974	0.999976	1.00418	1.00778
ctpC	1.0058	1.0063	1.01805	1.00677	1.00368	1.02661	1.00939	1.04251	0.991718	1.00899	1.02369	0.989073	1.03942	0.991811	1.02602	1.0139	1.00682	1.02734	1.03141	1.04456	0.980027	0.986985	1.02924	1.01464	1.01561	1.01707	0.997049	1.01837	1.00567	1.01204	1.02607	1.02182	1.02246	1.02386	1.0219	1.01907	1.03541	1.00682	1.01147	1.01546
treX	1.02592	0.996766	1.01688	1.02782	1.02389	1.02644	1.01208	1.03686	1.00446	1.00186	1.00861	1.01229	1.0112	0.974139	1.01374	1.00538	1.0165	1.02579	1.02326	1.02593	1.01536	0.995438	1.02494	1.00589	1.03341	0.995422	0.980112	1.01353	1.02718	1.0296	1.03445	1.03782	1.00935	1.0395	1.01471	1.02743	1.01491	0.992581	1.03124	1.03199
cgp_0442	1.01542	1.00125	1.01649	1.02213	1.04274	1.00425	1.01277	1.03007	1.03655	1.02069	1.00173	0.970759	1.0094	0.967139	1.00802	0.994385	1.01115	1.03353	1.02512	0.997383	0.983058	0.987884	1.02717	1.02901	0.998484	1.02727	1.00424	0.993311	1.02848	1.01502	1.0188	1.03439	1.01246	0.991329	1.01753	1.02294	1.0338	1.01243	1.03117	1.02234
cgp_0369	0.994597	0.995264	0.99564	1.01309	1.02337	1.01542	1.01311	1.02453	0.995352	1.00954	1.00864	1.00818	1.02089	0.958349	1.01887	1.00553	0.99877	1.03896	1.0429	1.00569	0.967342	0.976917	1.01796	1.01326	0.993566	0.990512	1.01249	1.01086	0.999466	1.01782	1.01902	1.02325	1.01145	1.01272	1.02559	1.01921	1.04374	0.990721	1.02615	1.0388
cgp_2599	1.03341	1.0006	1.03549	1.00145	1.03002	1.02375	1.02265	1.03721	1.01414	0.996684	1.03304	0.985196	1.00132	1.01381	1.02076	1.02042	0.981403	0.999378	1.00213	1.03075	1.00317	0.987468	1.01588	1.02362	0.97222	1.00436	1.01332	1.00741	1.02345	1.02476	0.997051	1.02558	1.03645	1.00893	0.982833	1.01193	1.03359	1.01109	1.03188	1.02249
cgp_2729	1.00749	0.99623	0.995403	1.00598	1.01435	1.00208	0.989906	1.02963	1.0122	0.979307	1.01196	1.00496	1.02871	0.999686	1.02696	1.00033	0.982596	1.00544	0.999132	1.00729	0.954071	0.994864	1.01834	1.00246	0.99419	1.03046	1.00006	0.996412	1.02693	1.03446	1.01475	1.03555	1.03661	1.00255	1.01562	1.01713	1.01677	0.977109	1.01906	1.00777
mutM2	1.00313	1.02288	0.980285	0.981869	1.01693	0.99201	0.993643	0.994913	1.00228	1.00354	1.00757	1.02407	0.981278	0.996094	1.02033	0.988568	1.00889	1.00078	1.00257	1.0246	1.0121	0.976786	1.02422	1.01284	0.983437	0.983523	1.00384	0.989138	0.999105	0.994556	0.998433	1.00192	0.993467	0.993364	1.01304	1.00127	0.990743	1.00457	1.00801	1.00744
cgp_3240	0.996089	1.0126	0.992564	0.983419	1.01262	1.00587	0.994491	0.997977	1.00892	1.02825	0.976125	1.01305	0.971257	0.979197	1.00215	1.01497	1.00663	1.02193	0.975588	1.00401	0.99228	0.978073	1.01044	1.00431	0.996023	0.99805	0.96682	1.00499	1.01576	0.996073	1.01898	0.993244	1.00963	0.991154	1.01466	1.00174	1.01816	1.00917	0.996662	1.00776
cgp_0282	0.978573	1.01458	0.998818	0.980846	1.01885	1.00718	0.998372	1.01396	1.02722	1.02951	0.999483	1.0007	0.996415	0.972547	1.02047	1.00235	0.994386	1.04025	1.0195	1.01738	1.00662	0.983502	1.04241	1.0127	0.992437	0.996501	1.01271	1.01728	0.992018	1.02394	1.00108	0.980555	0.983187	0.97619	1.0354	1.0509	1.02206	1.00893	1.00781	1.01583
cgp_0468	0.978934	0.993017	1.01201	0.991667	1.02722	0.995531	0.996423	0.992052	1.02777	1.013	1.0154	1.00577	1.02518	1.00157	1.00502	1.01714	1.00112	0.992002	1.00995	1.03681	0.990502	0.995061	1.02813	1.02529	1.01629	0.98749	0.992514	1.00369	0.991156	0.96912	0.984385	0.994153	0.982489	0.993543	1.01393	1.02007	1.03431	1.02218	1.04011	1.0106
cgp_0211	1.02721	0.994813	0.998975	1.01406	1.00536	1.00306	0.998384	0.984047	1.02111	1.00742	1.03639	0.992902	0.993408	0.985114	1.00938	1.01098	1.0008	1.01943	1.01013	1.01692	1.01677	0.991813	1.01135	1.01912	1.01478	0.971335	1.00362	1.01649	1.00781	0.967959	0.997723	0.996455	0.975674	0.986405	1.00868	1.02272	1.01573	0.993035	1.01734	1.00021
cgp_0774	1.02506	1.00221	1.02652	1.0162	1.02092	1.0192	1.02312	0.994834	1.00148	0.998202	1.01493	1.00267	1.03103	1.02569	1.0195	0.98476	1.01156	1.00991	1.01857	1.01497	0.980708	0.998872	1.01883	1.00865	1.02567	1.01323	1.00331	0.994274	1.0059	0.983083	1.00594	1.03135	1.01254	0.998734	0.977493	1.02421	0.97868	1.02184	0.990434	1.02994
cgp_0471	1.02122	0.997318	1.01785	0.998736	1.01223	1.02031	1.01738	1.00362	1.0056	0.962057	1.00433	1.00469	1.02563	1.0233	0.999433	1.00421	1.03267	1.01304	1.01338	1.00839	0.991331	1.01092	1.01817	1.01859	1.0047	1.01323	1.00266	1.01103	1.01207	0.985517	0.988482	1.00806	1.01071	0.994261	0.997258	0.994881	0.991594	1.01574	1.02087	1.00886
cgp_0611	1.01345	0.99719	1.00854	1.02052	1.01614	1.00782	1.01887	0.988769	0.997628	0.977891	1.02254	1.01217	1.02961	0.994789	1.011	1.02721	1.03751	1.02199	1.01326	1.02103	1.02798	0.994725	1.03494	0.998713	1.0299	0.98653	1.01348	1.01289	1.01358	1.00541	0.994385	1.02033	1.00046	0.998915	0.995427	1.0246	0.963334	1.00955	1.01705	1.01721
dhaS	1.03031	0.990534	1.0149	1.0101	1.00539	1.02049	1.02696	1.00124	1.00951	0.960535	1.00575	1.0004	1.00876	1.02823	1.01957	1.03018	0.989526	1.00765	1.02053	1.04669	0.994252	0.993896	1.02438	0.985157	1.01513	0.9892	0.996766	1.00706	1.017	1.02694	1.02581	1.02019	1.00824	1.01797	0.986283	1.00787	1.00094	1.00565	1.01098	1.00953
cgp_1194	1.00409	0.98434	1.01086	1.01735	1.02833	1.04101	1.02049	0.97695	1.01198	0.999039	1.00915	1.01574	0.998546	1.03214	1.01563	1.00763	1.04135	1.02487	1.00244	1.01498	0.978131	1.01301	1.01103	1.02899	1.00705	0.970527	0.980554	1.01902	1.00204	1.02167	1.03421	1.03854	0.991124	1.01826	1.04011	1.02448	0.990821	0.999422	1.01445	1.02829
cgp_1206	1.01145	0.974537	1.00655	1.01919	1.0131	1.02245	1.01188	1.00697	1.03127	0.956087	1.03429	1.01256	1.0094	1.01662	1.01117	1.03714	1.01444	0.999009	1.00315	1.0023	0.978813	0.99732	1.01379	1.02927	0.994786	0.995326	1.01808	1.0008	0.998891	1.0028	1.01165	1.03828	1.00146	1.01865	1.00324	1.05856	0.990739	1.01112	1.01631	1.02595
cgp_1566	0.995339	0.994031	0.991502	1.02782	1.01768	1.01034	1.01897	1.01213	1.01006	0.993696	1.01161	1.03282	1.02756	0.99764	1.00846	1.0422	1.01223	1.00781	0.997316	1.00551	1.0083	0.995472	0.993431	0.996696	0.97149	0.988765	1.01226	1.01891	0.994341	1.02955	1.01304	1.04362	1.00651	1.01861	1.01088	0.998299	0.999148	1.00744	0.99957	1.00169
cgp_3317	0.982127	0.995979	1.01269	1.03165	1.02334	1.01839	1.01655	1.01313	1.00178	0.99855	1.01577	1.02572	1.02293	1.0017	0.980564	1.01522	1.02687	1.00431	0.996073	1.00591	0.985385	0.971492	1.01627	1.01278	0.99197	1.00125	0.984563	1.01578	1.00305	1.00994	1.00181	1.01932	0.986908	0.994353	1.0237	0.985467	1.00821	0.971689	1.00141	1.00206
cgp_0514	1.01679	1.00318	1.01172	1.03488	1.00915	0.998518	1.02651	1.02835	0.997905	0.999247	1.02436	1.02486	1.02927	1.01289	0.982288	1.01168	1.04225	1.00005	1.01927	1.01575	1.00477	1.02081	0.995186	1.01112	1.00233	0.984375	0.984132	1.03375	1.01264	1.04188	0.976683	1.00927	1.0122	0.997363	1.00923	1.00058	1.01242	1.01544	1.01472	1.00016
cgp_3038	0.978543	0.99996	1.03531	1.006	1.01569	1.02289	1.01614	1.02897	1.02862	0.995825	1.02853	1.05815	1.02548	1.01954	0.99936	1.02149	1.02771	0.99324	0.996442	0.992497	1.00203	0.998972	0.996129	0.996688	1.00798	1.01265	0.993916	1.02823	1.01168	1.01359	1.01244	1.01653	1.014	1.01954	0.987711	1.02283	1.02335	1.00662	1.01418	1.01041
cgp_2558	0.980754	0.979287	1.0209	1.00438	1.01762	1.00499	1.02143	1.03284	0.990693	1.02456	1.01567	1.01596	1.00823	1.0227	1.00935	1.02222	1.03295	1.01077	1.01276	0.978157	1.00822	1.00479	1.01071	1.0104	1.0058	0.99173	0.985676	1.00405	1.0086	1.00399	0.998603	1.01869	1.00058	0.986508	0.989443	1.01485	1.00727	0.99962	1.00914	0.998499
cgp_0537	0.990669	1.01288	1.02657	1.01314	1.02005	1.01915	1.02333	1.00776	1.01641	1.02652	0.984833	1.01363	1.02295	0.983906	0.997887	1.02716	1.00751	1.01274	1.00938	0.984439	0.99325	0.996867	1.02313	0.984496	1.00604	1.00037	0.998476	0.991035	0.995701	0.977801	1.01849	1.02303	0.976858	0.991953	1.01399	0.992395	1.0321	0.997203	1.01138	1.01093
dctA	0.957477	1.00901	1.01036	1.02763	1.0174	1.02068	1.01224	1.01661	1.00637	1.03339	1.0091	0.983527	1.01475	1.00822	1.0113	1.00478	1.02196	1.00693	1.0001	0.983843	1.00063	0.957248	0.988639	1.00903	1.01007	0.984776	0.998638	0.99953	0.996756	0.985394	0.999694	1.02731	0.97863	0.992106	1.00605	0.989182	1.00879	1.01267	1.01174	1.00865
cgp_0891	0.941582	0.990793	0.999427	1.00607	1.00041	1.03335	1.00489	1.01354	0.974351	1.00376	1.0198	1.00006	0.998288	1.01065	1.0143	1.0313	0.985831	1.01741	0.992197	0.984619	1.00418	0.998762	1.0258	1.00226	1.02182	1.02754	1.00749	0.990174	1.00731	0.990302	1.01885	1.0068	0.992205	0.996125	1.00511	0.988214	1.04374	0.992069	1.02209	1.01979
cgp_0221	0.984492	1.03152	0.990414	1.01179	1.025	1.01893	1.01841	0.999571	1.02189	1.01961	1.01274	0.952408	0.989691	1.02199	0.999463	1.01581	0.981328	1.02453	1.00596	0.982877	0.970935	0.967142	1.02797	1.00866	1.0399	1.00586	0.998985	0.977974	1.02602	0.968049	0.986342	1.01863	0.993076	0.994228	1.02685	1.01749	0.993946	1.00721	1.01027	0.98954
cgp_2467	0.995147	1.01995	0.996387	1.00497	1.0174	1.03475	1.03945	1.02389	1.04488	1.04612	1.01602	0.993471	1.01698	1.01023	1.01154	1.02057	1.00078	1.02176	1.00065	0.991333	1.01541	1.00045	1.00723	0.96082	1.01689	1.01043	1.00019	1.02576	1.00324	1.02524	1.02111	1.03723	1.00096	1.01906	1.00343	1.02724	1.00686	1.0069	1.0123	1.03663
pepB	0.997095	0.983337	1.03028	1.027	1.03036	1.01297	1.02932	1.02071	1.02688	1.03845	0.996305	0.992181	1.01045	1.04819	1.00443	1.00323	1.01504	1.01988	1.00814	1.00612	1.02675	1.0064	0.975767	0.966316	1.00404	1.01168	1.0018	1.01899	1.01445	0.990348	1.00392	1.01598	1.00008	1.00064	1.00254	1.01602	1.00639	0.991244	1.00962	1.00062
cgp_2686	0.977534	0.981606	1.00502	1.01757	1.02285	1.02301	1.02621	1.01667	1.02384	1.05473	1.05242	1.00465	1.03325	0.987585	0.975377	0.992744	1.01434	1.01926	1.0208	0.976986	1.00298	0.98433	1.02077	0.984737	0.990473	1.02414	0.999491	0.990544	0.992946	1.00131	0.990398	1.01777	0.998888	1.00327	1.00943	1.01696	1.0296	0.989447	0.985853	0.989918
sseA1	0.962002	0.993028	0.991607	0.999101	1.01341	1.02145	1.00983	0.988051	1.03157	1.01424	1.02999	1.00406	1.03086	0.996961	1.00137	1.00243	0.993194	1.01156	1.01498	1.01431	1.02017	0.964729	1.04481	1.03501	1.03557	1.01688	1.00086	0.999327	1.00969	0.997616	0.99864	1.01518	1.00476	1.01612	1.03855	1.0153	0.987905	0.980914	1.0107	1.0238
butA	0.978504	0.978338	0.984789	1.01633	0.993548	1.02573	1.03438	0.981002	1.00379	1.01035	1.02551	0.996375	1.00809	0.991846	1.00591	0.990859	0.999704	1.03352	1.02828	0.999963	1.00529	0.990828	0.983338	1.00103	1.01983	1.0121	1.00807	1.01469	1.02103	1.03346	1.01093	1.00127	1.0057	1.0061	1.01297	1.049	0.985143	1.00658	1.00677	1.00554
cgp_2462	0.972854	1.02294	1.00683	1.01592	0.998764	1.01845	1.02399	1.00071	1.02267	0.992822	1.03245	0.915867	1.01069	0.986609	0.999692	0.990864	1.00522	0.995862	1.0213	1.02243	1.00347	0.998462	1.02769	1.0306	1.00793	1.00747	1.02566	1.01256	1.01728	1.01814	0.988939	1.02311	0.990211	0.989926	1.02103	1.0449	1.01703	1.00032	1.00718	1.01466
nagI	1.02368	1.02082	1.00091	1.01113	1.01151	1.00612	1.01932	1.01039	1.02992	0.98559	1.02244	1.02393	1.00627	1.01439	1.00863	0.993566	1.02101	1.01621	1.02577	1.01533	1.00683	0.993097	1.00851	1.00477	1.00591	1.01572	1.01664	1.00559	1.003	1.00152	1.00363	1.01767	1.0166	1.00065	1.00492	1.00895	0.9888	1.01958	1.01878	1.00633
fadD1	1.01514	1.02289	1.02108	1.00049	1.01558	1.02058	1.01173	1.02083	1.02517	0.997017	0.999441	1.00426	1.01994	1.0201	0.994162	1.00135	1.01755	1.01661	1.02809	1.01524	1.00201	1.00022	1.00781	1.02007	0.99725	1.01546	0.997235	0.996197	1.02964	1.00388	1.00317	1.00596	1.01089	0.990293	1.01905	1.00691	0.989328	1.0056	1.01936	1.01039
leuA	0.996649	1.00293	1.01094	1.01402	1.01027	1.00837	1.00145	1.0076	1.00993	0.996826	1.0053	1.00771	1.01561	1.0257	1.004	1.01292	1.00812	1.02356	1.03209	1.00064	1.00835	0.992886	1.02245	1.0267	1.01973	1.01498	1.01453	1.00926	1.00991	1.00275	1.00314	1.01289	0.99393	0.996421	1.02361	1.00794	1.00718	1.00552	1.01711	1.01819
cgp_3354	1.0029	1.01376	0.998132	1.01115	1.0155	1.01477	0.995699	0.993146	1.01717	1.00751	1.01377	1.01049	1.0246	1.02779	1.00168	1.00457	1.00564	1.01175	1.02535	1.00602	1.00622	0.99408	1.00361	1.01671	1.00645	1.00729	1.00377	1.0114	1.02442	0.996085	1.00257	1.01759	0.991006	1.00644	1.02785	1.00675	0.99648	1.02182	1.01933	1.00301
rmpC	1.01513	1.026	1.00719	1.00153	1.0192	1.00854	1.00618	1.01897	1.00672	0.989325	1.00947	1.00703	1.02761	1.01134	1.01459	1.01392	0.999821	1.02469	1.0319	1.0171	1.01998	1.00404	1.02363	1.02725	1.02452	1.00534	1.01249	1.02038	0.999813	1.00569	1.01269	0.997488	1.02566	1.01383	1.03788	1.02863	0.989876	1.01953	1.02966	1.0168
cgp_3389	1.0203	1.02329	1.02063	1.00907	1.02091	1.02435	1.00759	1.00934	1.01846	0.979656	1.02094	1.00523	0.999593	1.00893	1.01941	1.01893	1.02322	1.0178	1.03368	1.01443	1.00918	0.981819	1.01005	1.02753	1.00815	1.00882	1.0219	1.02151	1.02442	1.00662	1.02434	1.00083	1.0221	0.994707	1.01422	1.02044	0.993455	1.02634	1.01516	1.01204
cgp_3388	1.01335	1.01132	1.01923	1.01688	1.02043	1.03501	1.01356	1.02025	1.02013	0.999087	1.0276	1.00236	1.03023	1.01914	0.999892	0.999086	1.01886	1.00541	1.02617	1.00696	1.03359	1.01	1.02212	1.01838	1.02024	1.01936	1.00939	1.01471	1.02291	1.00319	1.00358	1.00087	1.01778	1.03021	1.01088	1.01538	1.02142	1.02624	1.02352	1.00928
cgp_0506	1.00525	1.02958	1.01779	1.01409	1.01469	1.01121	1.0181	1.02354	1.01527	0.983566	1.02084	0.999671	1.03571	0.996285	1.00337	1.00374	1.0173	1.02064	1.02046	1.0113	0.997345	0.990709	1.01511	1.01087	1.03237	1.02567	0.989988	0.993197	1.01553	0.996532	1.01511	0.998456	1.01811	1.01963	1.01134	1.00327	1.01163	1.0024	1.00899	1.00986
cgp_3086	1.03001	1.01231	1.02856	1.01326	1.02052	1.01702	1.02436	1.01944	1.02241	1.00443	1.03239	1.02755	1.00105	1.0283	1.01892	1.01667	1.03233	1.00672	1.0119	1.01046	1.01667	1.00657	1.01814	1.0108	1.02227	1.00439	1.01711	1.01327	0.998935	1.0243	1.01825	1.0298	1.00826	1.00862	0.997868	1.00483	1.00817	1.01578	1.01286	1.01529
cgp_0456	1.02427	1.02208	1.00797	1.01052	1.01549	1.01045	1.01602	1.00693	1.01335	1.02119	1.02743	1.02751	1.019	1.0235	1.01416	1.01251	1.02166	1.02208	1.01328	1.02577	1.01291	0.986124	1.0302	0.993297	1.00118	0.99734	1.01313	1.00898	0.997646	1.00501	1.0156	1.01951	1.00636	1.00866	1.0062	1.02192	1.02143	1.02358	1.01459	1.0242
msiK1	1.01915	1.0067	1.03746	1.02674	1.02147	1.01406	1.01243	1.02956	1.01508	0.990607	1.0222	1.00784	0.994953	1.02504	1.00715	1.00131	1.00877	1.0024	0.996351	1.01151	1.01922	1.00514	1.02166	0.993547	1.00451	1.00478	1.00916	1.01047	1.00983	1.00597	1.00275	0.990511	0.994194	1.00952	1.009	1.04073	1.00191	1.00711	1.02025	1.00651
cgp_2577	1.01215	1.02098	1.02566	1.02419	1.0262	1.01356	1.01239	1.0208	1.01683	0.990413	1.00464	1.04835	1.03316	1.01421	1.01534	1.01877	1.02084	1.00561	1.01876	1.02906	1.0058	0.989973	1.02106	1.01361	1.03092	1.0027	1.01401	1.01612	1.02024	1.00931	1.0233	1.01566	1.0165	1.0138	1.00083	1.00875	0.99277	1.0071	1.01222	1.00938
cgp_0570	1.00583	1.00915	1.02168	1.02327	1.00792	1.01474	1.01664	1.02554	1.01384	0.990403	1.00155	1.0327	1.02048	0.996135	1.0049	1.0165	1.01702	0.992963	1.02029	1.0085	1.00836	0.993027	1.01657	1.01617	1.02282	1.01871	0.997094	1.00962	1.01402	1.00689	1.00994	1.01615	1.02122	1.0004	1.01285	1.01135	1.01669	1.0046	1.0127	1.00643
pstS	1.00556	1.0159	1.02313	1.02386	1.02085	0.991457	1.00923	1.01044	1.01472	0.989684	1.00826	1.01881	1.02874	1.02528	0.996684	1.013	1.02321	1.01084	1.00648	1.01284	1.01806	1.00172	1.01833	1.00056	1.0373	0.999056	1.00484	0.999966	1.00558	0.988977	1.00621	1.02295	1.00128	0.999902	0.999818	1.01077	0.995808	1.00337	1.02276	1.01983
mrpA	1.0133	1.00866	1.01636	1.01224	1.00941	1.02234	1.01962	1.01313	1.00563	0.989084	0.981161	1.0326	1.01166	1.02385	1.02009	1.02086	1.01497	1.00859	1.0245	1.02018	1.01793	1.00495	1.02553	1.00734	1.01788	1.01611	1.00277	1.00743	1.01246	1.01804	1.0126	1.01371	1.01842	1.01103	1.02498	1.02425	1.0037	1.01233	1.01632	1.0136
cgp_3185	1.00981	1.00768	1.01504	1.00841	1.01532	1.01103	1.00762	1.00271	0.991498	0.990678	0.993279	1.01713	1.01479	1.01213	1.0219	1.02063	1.00974	1.01138	1.01813	1.00574	1.01516	0.992747	1.01571	1.00648	1.005	0.999186	1.00008	1.00755	1.01023	1.00322	1.00709	1.02592	1.01368	1.00933	1.04127	1.01675	1.02257	1.015	1.00676	1.00673
metE	1.01226	1.01778	1.01664	1.01032	1.0086	1.02795	1.02169	1.02361	1.00494	0.980308	0.993821	1.02297	1.01682	1.01261	1.02162	1.01848	1.01905	1.01846	1.01253	1.029	1.01249	0.999071	1.01169	1.01499	0.994677	0.997747	1.01374	1.01159	1.01045	1.01948	1.01243	1.02647	1.00879	1.0116	1.0121	1.00469	1.0335	0.99869	1.00356	1.00044
cgp_2675	1.02227	0.998551	1.01357	1.01119	1.01725	1.01851	1.00228	1.01339	1.00596	0.983079	0.996514	1.00956	0.981836	1.01536	1.02019	1.01492	1.01593	1.02006	1.01598	1.02633	0.996938	0.987796	1.01321	0.99613	1.01022	0.999787	1.00144	1.00886	1.00739	1.01119	1.01052	1.01594	0.995084	0.999605	1.02784	1.01425	1.01684	1.0154	1.00233	1.01671
cgp_1202	1.03863	1.00653	0.995338	1.01059	1.0126	1.02238	1.0113	1.02491	1.00583	0.997524	0.997705	1.02091	1.03025	0.999862	1.01842	1.00503	1.01062	1.01885	1.00653	1.02789	1.00952	0.986923	1.01199	1.00302	1.00501	0.998237	0.986539	1.00841	1.03084	1.01083	1.02501	1.01092	1.02722	0.99906	1.01182	1.01061	1.01399	1.00602	1.01034	1.00975
mrpD	1.01718	1.01593	0.997319	1.00343	1.0055	1.00407	1.02087	1.01115	1.01393	0.995387	0.977024	1.012	1.00279	1.01285	1.0189	1.01772	1.01587	1.01297	1.00076	1.01567	1.01055	0.989146	1.01374	1.00734	1.00547	0.996661	0.987021	0.99169	1.01176	0.991385	1.01347	1.00696	1.02681	1.00983	1.01749	0.989895	1.01784	1.00475	1.01859	1.00318
cgp_3245	1.00934	1.03326	1.00305	1.01149	1.00741	0.992956	0.997935	1.01315	1.01007	0.988911	1.02027	1.02256	1.01433	1.01604	1.01695	1.00512	1.01029	1.01611	1.0271	1.0088	1.02447	1.01625	1.01434	1.00544	1.01673	1.00845	1.01071	1.01192	1.00292	0.997094	1.01607	1.00171	1.01817	1.00592	1.01527	1.00318	1.04398	1.03117	1.01795	1.02125
cgp_3272	1.00321	1.01308	0.997691	1.00005	1.00653	0.996695	0.992936	1.01931	1.01613	0.961276	1.00041	1.01471	1.0131	1.01129	1.00782	1.00885	0.99456	1.00531	1.01073	1.03063	1.02675	0.995203	1.00879	1.01318	1.02008	1.02061	1.00697	1.00948	1.00667	1.00335	1.00958	0.991724	1.0152	1.00937	1.01785	1.01276	1.01184	1.01284	1.02002	1.01575
cgp_1395	1.01497	1.02595	1.02021	1.00403	1.01589	1.02559	1.01967	1.01926	1.02328	0.990561	0.9955	0.995636	1.0181	0.99863	1.00792	1.0238	1.01719	1.00251	1.03621	1.04758	1.01884	0.998052	1.00498	1.01931	1.00578	1.00856	1.02578	1.0206	1.01575	1.02392	1.0331	1.02662	1.01093	1.0168	1.0177	1.0405	1.00689	1.00913	1.01771	0.994457
modA	1.0086	1.03598	1.01655	0.997873	0.997702	1.0072	1.02036	1.01919	1.02642	0.979606	1.00187	0.990521	1.00126	1.01475	1.01248	1.00129	1.02944	1.03582	1.04045	1.0199	1.01732	1.00149	1.00455	1.00291	0.996216	1.02715	1.01784	1.01677	1.02074	1.00978	1.01162	1.00778	1.01071	1.00703	1.01287	1.02957	1.02326	1.02963	1.0166	1.0092
cgp_3251	1.03209	1.01141	1.02224	1.02135	1.00812	1.01352	1.02857	1.02053	1.02038	1.00146	0.991756	0.976997	1.01175	1.01882	0.990353	1.01599	1.02449	1.01656	1.04377	1.03448	0.998406	0.999453	1.02306	0.989866	0.990009	1.01753	1.00539	1.02339	1.0021	1.0158	0.995401	1.02644	1.03414	1.00806	1.02549	1.01269	0.999561	1.02081	1.01259	1.00611
cgp_1044	1.03457	1.00549	1.01018	1.00869	1.02288	1.02573	1.05605	1.03134	0.991052	0.997634	0.987885	1.03877	1.01982	1.02436	1.01212	1.00405	1.0147	1.02149	1.03571	1.03334	1.00914	0.996226	0.998503	1.0256	1.00535	0.997825	0.998538	1.01417	1.01228	0.999044	1.00867	1.02256	0.998998	1.00812	1.02753	1.03725	0.998893	1.03034	1.0093	1.00925
cgp_0065	1.01242	1.0207	1.02868	1.03321	1.00528	1.02776	1.02045	1.0082	1.02262	1.00133	1.01317	1.01565	1.00702	1.02566	1.01044	1.02841	1.01217	1.02659	1.02148	1.00213	0.99829	1.00763	0.99748	1.03374	1.01694	1.01515	1.01692	1.01869	1.02891	1.02943	1.00281	1.01495	1.01703	1.00579	1.02888	1.02623	1.05186	1.02356	1.02066	1.02231
glsK	1.00777	1.02912	1.034	1.00896	1.00133	1.01486	1.00379	1.02167	1.01354	0.989145	1.02824	1.00313	1.0221	1.02913	0.999137	1.02489	1.0176	1.00745	1.00638	1.00803	0.999109	0.997165	1.01436	1.01504	1.01745	1.01802	1.01396	1.02612	1.02085	1.00714	0.990833	1.01572	1.01126	1.02323	1.03052	1.01168	1.04327	0.992648	1.00066	1.00828
wzx	0.980489	1.01631	1.00917	1.02053	1.00796	1.02475	1.01193	1.033	1.03021	1.01304	0.996279	1.02631	1.01376	1.01517	1.01016	1.03171	1.01877	1.01471	1.00606	1.01511	0.992143	0.989393	1.01609	1.01216	1.02895	1.00698	1.00929	0.999287	1.01252	1.00158	0.989429	1.01602	1.02295	1.00046	1.03944	1.01054	1.02759	1.00458	1.00627	1.01976
prpC2	1.04794	1.01008	1.02656	0.996704	1.0134	1.0282	1.0105	1.03093	1.02339	1.01746	1.00734	1.02936	0.992853	1.02665	0.987176	1.0379	1.02058	0.997866	1.02372	1.01506	1.00826	0.992282	0.996886	1.02556	1.02795	1.00241	0.998619	0.994983	1.01603	0.996934	1.00658	1.01477	1.01631	1.01099	1.00337	1.00544	1.03684	0.99401	1.00886	1.02515
cgp_2267	1.0272	1.01314	1.01584	1.03381	1.01086	1.03323	1.02886	1.00485	1.00759	0.988234	1.00319	1.01743	0.979809	1.04034	1.00139	0.998606	1.01521	0.998036	1.01632	1.02718	1.01716	0.977373	1.00647	0.98686	1.01902	1.00092	1.02468	1.01105	1.00505	0.992369	1.02628	1.02329	1.02399	1.0183	1.0319	1.00177	1.03051	1.00237	1.00862	1.00729
cgp_0265	1.00949	1.02206	1.00938	1.00515	1.01174	1.0345	1.02269	0.996218	1.00763	1.01584	1.01651	1.00036	1.00584	1.03298	1.02034	1.00905	1.01353	0.999043	1.03357	0.988737	0.99369	0.975884	1.01577	1.01528	0.999452	1.011	1.0077	1.02034	1.00248	0.992231	1.01974	1.02799	1.00404	0.998266	1.03182	0.998616	1.03539	1.00781	0.995306	1.01574
cgp_3095	1.0402	1.02267	1.00922	1.01859	1.01818	1.01554	1.00957	0.999961	1.02063	0.973783	0.999115	1.02185	0.994984	0.991744	1.00314	1.01164	1.00286	1.00676	1.01599	1.00334	1.00795	1.00353	0.995556	1.0118	1.01269	1.00974	0.999138	1.00421	0.987077	1.01076	1.01669	1.00462	1.00455	0.999167	1.01062	1.01935	0.999761	1.00573	1.0187	1.02422
cgp_3353	1.03391	1.00706	0.991383	0.992925	1.0255	0.995335	0.990504	1.00027	1.01996	0.990715	0.999975	1.02202	0.986222	1.0043	1.00255	1.01145	1.00019	1.02121	1.0184	0.996655	1.0104	0.996162	1.0041	1.0186	0.992664	0.989685	1.00838	1.01217	0.991351	0.992596	1.00593	1.00479	0.98377	0.991702	1.00895	1.02254	1.00108	1.02165	1.01901	1.01278
cgp_3022	1.04552	1.01247	1.01903	0.994707	0.997729	1.0047	1.00539	1.02245	1.01012	0.980776	1.00374	1.01247	1.00239	1.02439	0.995983	1.01472	1.01438	1.00293	1.01572	1.01271	1.01783	0.990972	0.997416	1.01204	1.00394	1.00742	1.01727	1.00647	0.994659	1.01661	1.02756	1.00665	0.993683	0.98464	1.0374	1.00853	1.03059	1.0107	1.01186	1.00691
ino1	1.01709	1.00797	1.02808	0.999289	1.0254	1.01351	0.994288	1.00805	1.00196	0.975515	1.01513	1.03474	1.01353	0.981609	1.0164	1.02103	1.01054	1.00581	1.02603	0.986938	1.01361	0.996987	1.01945	1.02639	1.02081	0.99774	1.00394	1.00648	1.00694	1.02236	1.01929	1.00905	0.997654	1.01053	1.02676	1.04553	1.0148	1.01007	1.01639	1.00385
cgp_0784	1.02853	1.01979	1.01471	0.987236	1.01065	1.00997	1.00334	1.00101	1.00501	0.977783	1.00861	1.00709	0.981889	0.991296	1.02676	1.02499	1.00668	1.0046	1.02666	0.994982	1.02267	1.02298	0.986059	1.02102	1.00722	0.998738	1.01582	1.02639	0.998508	1.01728	1.00706	0.994794	1.02319	1.01177	1.01633	1.02277	1.01343	1.0037	1.00162	0.989619
gip	1.05197	1.03595	1.01103	0.987056	1.0167	1.0293	1.00981	0.999156	1.02493	1.02063	1.0371	1.00751	1.01618	1.03275	1.00814	1.01438	1.02873	1.0046	0.99552	1.01088	1.00259	0.995581	0.975044	1.02257	1.01628	1.01144	1.02173	1.00009	1.01846	1.01224	1.02416	1.00474	1.00052	1.02717	1.01254	1.03296	1.00467	1.01725	1.01239	1.00916
cgp_0251	1.00948	1.00694	1.00064	1.00223	1.01455	0.996659	0.993738	1.01272	1.02008	0.996266	0.993427	1.04154	1.00063	0.994027	1.00471	1.00468	1.00177	1.01318	1.0217	1.01514	1.03185	0.99482	1.041	1.01493	1.00777	1.02902	0.992162	1.00831	0.99525	0.979862	0.998255	1.00927	1.00809	1.00749	1.00291	1.0217	1.01634	1.00434	1.01314	1.0255
mdh2	1.03441	1.00855	1.00335	1.0109	0.990386	0.998277	0.999966	1.01522	1.00231	0.989482	0.992228	1.01944	1.00269	1.02115	1.01634	1.00313	1.01648	1.01084	1.00953	1.00851	1.01403	0.998379	1.03326	1.02041	1.01294	1.02369	0.988248	0.988579	1.01681	1.00292	1.00581	1.01912	1.00337	1.00567	0.979649	1.02635	0.987784	0.987836	1.01574	1.0126
cgp_0374	1.02526	1.00734	0.99906	1.025	0.991749	1.01958	0.99493	1.01682	0.990142	1.00334	1.02787	1.01721	0.995919	1.0153	1.01313	1.02467	1.02056	1.02045	1.02696	1.01753	1.01682	1.02002	1.01904	1.0307	1.01319	1.03116	0.993368	1.00087	0.994193	0.991474	1.0198	1.03028	1.00553	1.02483	1.01532	1.03315	1.03259	0.996992	0.996629	1.01643
cgp_0208	1.02312	1.0274	1.01902	1.00568	1.0109	1.01913	1.01464	1.01585	1.00455	0.969566	0.998584	1.01911	1.0405	1.00466	1.00747	1.0203	1.00752	1.0255	1.029	1.00763	1.00195	1.01619	1.0354	1.05034	1.01726	1.01149	1.01904	1.00677	1.02842	0.989947	1.0171	1.00882	1.03002	1.00977	0.996373	1.02469	1.0238	1.01142	1.02495	1.03866
cgp_0621	1.01824	1.02352	0.999274	1.01575	1.02558	1.00313	0.973395	1.01144	1.00695	0.955622	1.00251	1.00876	1.02146	0.997184	1.00788	1.02207	1.01731	1.00703	1.00775	1.02172	1.02249	0.985978	1.04141	1.0141	1.00575	1.00356	0.996445	1.01271	1.01235	1.00961	1.02055	1.01992	1.03541	1.01019	1.01754	1.03621	1.04008	0.992774	0.997333	1.03476
pstB	1.01808	1.01315	1.03209	1.01103	1.03125	1.02012	0.994052	0.999247	1.01599	0.985351	1.01929	1.04111	1.00418	1.03594	1.01732	1.01969	1.03681	1.0155	1.01848	1.04143	1.01528	1.00459	1.03148	1.01881	1.01655	1.03596	1.03025	1.00643	0.999093	1.02942	1.01196	1.01519	1.0139	1.00597	1.00683	1.04654	1.03694	1.03183	1.03346	1.0064
cgp_0470	1.01275	0.993365	1.00047	1.0084	1.00888	1.01632	0.991098	1.02734	0.993832	0.966906	1.01251	1.02415	1.00364	1.0121	1.02506	1.02139	1.0362	1.02584	1.02903	1.02416	1.03465	1.02117	1.03316	1.01799	0.98406	1.0156	1.02683	1.01011	0.996389	1.00859	1.00082	1.00285	0.98799	1.01365	1.01361	1.01728	1.02974	1.02633	1.05459	1.0143
cgp_0536	1.02882	0.983809	1.01843	1.00972	1.01338	1.01078	0.997511	1.0306	1.01697	0.999529	1.00044	1.01666	1.02678	0.980092	1.01097	1.01483	1.00986	0.986957	1.00128	1.0378	1.02279	1.0036	1.01912	1.0328	0.994901	1.00721	1.00281	1.0061	0.998358	1.02309	0.997804	1.00651	0.997956	1.01515	1.02525	1.00795	1.02646	1.02776	1.02477	1.01831
cgp_1018	1.01855	0.989187	1.02434	1.01428	1.00364	1.00714	1.01328	1.02778	1.00521	1.00075	1.00018	1.03338	1.02048	1.01742	0.99892	1.01748	1.02115	1.00239	1.01508	1.01196	1.02907	0.992232	1.01662	1.01708	0.998785	1.00781	1.00288	0.988738	1.01044	1.01841	1.01178	1.00927	0.99874	1.01126	1.0352	1.00863	1.01625	1.00653	1.01352	1.01574
cgp_0770	1.02884	0.983344	1.02332	1.00863	1.00957	1.00182	1.02552	1.00696	1.01636	0.987409	0.98288	1.03936	1.02071	0.998712	1.00625	1.03749	1.00266	1.00093	1.01347	1.03161	1.01683	1.01464	1.02012	1.0313	1.01183	1.01725	0.998259	0.998025	0.995081	1.00839	1.01616	1.0198	1.03267	1.02805	1.0167	1.03511	0.98024	1.02375	1.01602	1.00986
cgp_0902	1.03236	1.00126	1.03071	1.02012	1.022	1.02222	1.02876	1.0194	0.98586	0.992119	0.985452	1.00508	1.01029	0.999526	1.0451	1.02551	0.995738	0.999846	1.02111	1.01091	1.01513	0.999189	1.01958	1.03145	0.998514	1.02313	1.02861	1.01172	1.02397	1.0116	1.02989	1.01929	1.04409	1.01473	1.04815	1.0319	1.01093	1.0105	1.02573	1.02091
cgp_0008	1.02874	0.982421	1.00675	1.00925	1.02321	1.00259	0.985655	1.0012	1.01258	1.01346	1.00267	0.997483	1.00546	1.00618	1.02583	0.989889	0.999891	0.995521	1.00307	1.00435	1.01613	1.01659	1.01576	1.0255	1.00604	1.00503	1.03299	0.996391	1.0226	1.0085	1.01969	1.01022	1.02634	1.01915	1.05113	1.01407	0.989712	1.02738	1.02537	1.03585
pcaD	1.04643	0.990835	1.00696	1.01281	1.03975	1.01658	1.00404	1.02172	1.01118	0.992649	1.02261	1.01922	1.01572	1.02747	1.00959	0.996651	1.01477	1.01865	1.00629	1.01606	1.00721	0.993911	1.01601	1.00433	1.06006	1.00816	1.01523	1.03379	0.969437	0.980363	1.02491	1.02628	1.01006	1.01072	1.01613	1.01949	1.01772	1.01702	1.0111	1.01312
thiO	1.03346	1.01049	1.03697	1.02088	1.02924	1.02467	1.0152	1.03795	1.00888	0.997899	0.996112	1.01405	1.01187	1.02527	1.01062	1.01827	1.0288	1.01331	1.00754	1.01496	1.01236	0.976981	0.985488	0.9903	1.04313	1.00988	1.02175	1.01389	0.978126	1.00484	1.01529	1.02378	1.02361	1.0188	1.00872	0.998805	1.00759	0.997444	1.00745	0.992877
cgp_2524	1.00103	1.00778	1.00793	0.999475	1.02262	1.02181	1.01061	1.02629	1.01664	1.02363	1.01942	1.043	1.03188	1.00603	0.998133	1.01002	1.03813	1.00014	1.02171	1.03769	1.00847	1.00235	1.00703	1.0025	1.04727	1.00933	0.999589	1.01652	1.00908	1.01495	1.02841	1.03051	1.00295	1.03237	1.00722	0.976975	1.00553	1.00706	0.99611	1.00095
cgp_1243	1.05528	1.02298	0.99892	0.995635	1.00938	1.01043	1.01794	1.00831	0.987972	0.978775	1.02474	1.03787	1.0473	1.01211	1.01233	1.01228	0.993494	1.00267	1.00424	1.03082	1.01912	0.997095	1.01047	0.995396	1.03189	1.01502	1.02711	0.994545	0.996705	0.997168	1.02606	1.0165	1.01237	1.02127	1.02803	0.980966	0.998444	1.02576	1.00132	1.01342
nanE	0.991094	0.999423	1.00984	0.987806	1.03372	1.01023	1.03122	1.02771	1.02163	1.00852	0.994911	1.01436	0.980806	1.03258	1.00091	1.02906	1.01203	0.993617	1.01754	1.01237	1.02442	1.00487	1.02514	0.999386	1.02226	1.01058	1.01661	1.00417	1.00125	1.00238	1.0146	0.996763	1.00909	1.01307	1.01752	1.00572	0.97323	1.00444	1.01275	1.0209
cgp_0540	0.988951	1.00515	1.001	1.00813	1.00677	1.01274	1.0192	1.04316	1.00976	1.01423	1.0028	0.992641	1.01024	1.04121	0.999976	1.01916	0.995327	1.00479	1.01731	1.01275	1.02752	1.00057	0.985747	0.999278	1.02356	0.996853	1.00522	0.991132	1.02579	0.986434	1.01155	1.02249	0.995388	1.00772	1.01551	1.01091	0.991517	1.00486	1.00635	1.01629
cgp_0135	0.981569	1.00749	0.996561	1.01399	1.01862	1.01961	1.02254	1.01715	1.01705	0.980875	0.99526	1.0249	1.00062	1.03195	0.997099	1.03368	1.0042	1.00989	1.03602	1.01427	1.02591	0.995802	1.00543	1.01541	1.02761	0.99584	1.0063	1.02077	1.01896	0.976009	1.01976	1.00444	0.990753	0.993	1.01049	1.00922	1.01537	1.03188	1.0089	0.989899
cgp_2917	0.990653	0.978214	1.0274	1.00378	1.01334	1.02846	1.01844	1.04081	1.00123	1.00713	1.03342	1.04282	0.994795	1.02344	1.01253	1.02374	1.00132	1.00127	1.01261	0.978302	1.03136	0.982636	1.04088	0.999264	1.02499	0.992422	1.01104	0.992284	1.01848	0.995681	1.02146	1.01064	0.99456	1.02265	1.01602	1.0002	1.01025	1.03466	1.00638	1.01022
rbsK2	1.01108	1.02329	1.03271	1.03495	1.00361	1.00118	1.03689	1.00804	1.01134	0.995164	1.01895	1.04841	1.02473	1.04919	1.02318	1.01976	1.008	1.0004	1.01004	1.0183	1.00498	1.01124	1.00034	1.03213	1.05063	1.0173	1.00373	0.994834	1.01109	0.985861	1.03145	1.02014	0.990141	0.999507	1.03009	1.00391	1.03493	1.00202	1.01606	1.02225
cgp_0702	1.02602	1.03171	1.03057	1.01966	1.00904	0.985974	1.01344	0.98318	1.01132	1.00312	0.994447	0.996441	1.02409	1.0344	1.01037	1.04266	0.974046	1.00248	1.01861	1.04893	1.04153	0.991254	1.01147	1.01899	1.03173	1.01843	0.997072	1.01569	0.998073	0.988318	1.00538	1.0162	1.00994	1.00101	1.01087	1.01577	1.01545	1.02753	1.00833	1.02005
cgp_2357	1.00453	1.02499	0.98365	1.00613	1.00451	1.01136	1.01005	0.993515	1.0206	1.02237	1.02051	1.02912	1.03838	1.0322	1.0234	1.02881	0.992779	1.0263	1.02109	1.03269	1.03003	0.998871	1.01879	0.986169	1.01622	1.0001	1.01389	1.00971	0.974294	1.01609	1.05162	1.03123	0.984214	0.98549	1.03954	1.03014	1.02697	0.985088	1.00633	1.00181
cgp_1229	0.98705	1.0191	1.02214	1.0163	1.0152	1.0258	1.01364	1.03463	1.01206	1.00206	1.00619	1.04861	1.03461	1.0075	1.00226	1.00449	0.984523	0.987205	0.997439	1.0553	1.03812	0.992764	1.03805	0.978083	1.01568	1.0076	1.024	1.02922	0.97984	1.01049	1.04036	1.01925	1.01439	1.01427	1.01091	1.01765	1.01517	1.00705	1.00323	0.98945
benK	1.00153	1.02375	1.01178	1.01848	1.00762	1.02817	0.992732	1.00595	1.02833	0.989649	1.00044	1.03811	1.02176	0.997924	1.0197	1.01953	1.01194	1.02084	1.02497	1.0277	1.0117	1.00543	1.02114	1.03166	1.01454	0.99899	1.01551	1.01958	1.01099	1.02441	1.01023	1.01268	1.02204	1.02012	1.00696	1.03372	1.00402	1.0118	1.02506	1.01478
ureD	0.992033	1.02514	1.01581	1.02036	1.02355	1.02673	1.01853	1.00359	1.02068	1.00882	1.01754	1.05418	1.02112	1.00682	1.00173	1.01107	1.013	1.01613	1.03376	1.03025	1.01245	0.992609	1.02421	1.0262	1.0244	1.01187	1.01215	0.997643	1.03747	1.00349	1.0044	1.0022	1.01717	1.01682	0.996811	1.01584	0.993432	1.01564	1.02511	1.0154
cgp_0079	0.993844	1.02994	1.01118	1.02194	1.02697	1.03454	1.00467	0.994692	1.03101	1.0135	1.024	1.03104	1.01794	1.01119	0.996311	1.01198	1.02858	1.02149	1.03148	1.02175	0.996548	1.00237	1.0018	1.03751	0.984711	1.00729	1.00659	1.01988	1.01007	1.00914	1.03537	1.01619	0.999236	0.997706	1.02143	1.01615	0.978635	1.0228	1.03132	1.01893
dps	1.01536	1.04397	1.01097	1.00651	0.998147	1.01956	1.01479	1.01004	1.01506	0.990689	0.993804	1.04377	1.02967	1.01365	1.02205	1.02208	1.00938	1.00917	1.02509	1.05238	0.998935	1.01061	1.00967	1.03718	0.994772	1.01567	1.00405	1.00003	1.00897	1.01067	1.02041	1.00981	1.01539	1.02636	1.017	1.00202	0.952689	1.01039	1.01963	1.02972
cgp_0097	1.0093	0.995861	0.981736	0.9897	1.01217	1.00197	1.01411	1.0108	1.01918	1.00375	0.997367	1.01025	0.984474	1.00291	1.02118	0.980364	1.02762	0.975407	1.00313	1.02509	1.00935	0.985921	1.01361	1.04432	1.00034	1.04195	0.983864	0.991541	0.990496	0.98767	1.00317	0.988358	1.00372	1.00711	1.00783	1.01515	0.979953	1.03759	1.02288	1.00944
cgp_3135	0.9971	0.987633	1.01082	1.01614	1.0187	0.997653	1.00145	1.02258	1.02196	1.04248	0.984419	1.06567	0.999951	1.01243	1.01667	1.00696	1.03589	1.01258	1.02702	1.01985	0.976735	0.977862	1.00595	1.0313	0.991142	1.01148	1.00529	0.984918	1.00804	1.02376	0.990025	0.967245	1.01357	1.01674	1.02277	0.99538	1.02395	0.995028	1.02014	0.995017
cgp_0273	0.988947	1.00365	1.00897	1.02038	1.01079	0.985694	1.01432	0.998352	0.98387	1.00432	1.01046	1.06182	1.01422	0.99336	1.01087	1.0198	1.02296	1.02315	1.01921	0.991884	0.970482	0.986488	0.988855	1.03164	0.973331	1.01914	0.999759	0.988347	1.00071	1.01039	1.01445	0.988937	0.994948	1.01553	1.02826	1.00165	1.00031	1.01103	1.01874	1.01626
tpdA	1.00108	1.0028	1.01252	1.04143	1.03349	1.00714	1.01721	1.01518	1.01525	0.985466	1.00511	1.02333	1.04009	0.967522	1.00181	1.00817	1.00024	1.023	1.02207	1.00168	1.01032	1.00796	1.03233	1.02597	1.01097	1.03111	1.00031	1.01899	1.01015	0.991444	0.984984	0.967767	0.997045	0.999191	1.01829	1.02671	0.999902	1.01894	1.01846	1.0059
cgp_2457	1.0212	1.01693	1.01847	1.01865	0.998591	1.0111	1.00012	1.02139	1.02176	1.00518	1.00241	1.02332	1.02144	0.935791	1.01325	1.00446	1.00087	1.00083	1.0098	1.00088	0.986124	0.976551	0.986358	0.987162	0.9969	1.03164	1.01059	0.995632	1.00777	1.00605	0.982533	0.971879	0.990302	1.01742	1.03162	1.02461	1.01425	0.991864	1.00258	0.997185
cgp_3324	0.961686	1.02533	1.01418	1.02306	1.00711	1.02021	1.01986	1.04754	1.00849	0.994681	0.969537	1.02582	0.997575	0.977688	1.02953	0.998168	1.00807	1.00002	1.01068	0.989145	0.996228	1.01394	1.01667	1.00452	1.00359	1.0265	1.01076	1.00138	1.00182	1.00184	0.997509	0.981856	1.00748	1.02268	1.01453	1.04194	1.02655	1.01958	0.99457	1.02551
fdxA	1.00764	1.03673	0.968338	1.01386	0.992514	1.00994	1.02082	1.00941	1.03443	0.959445	0.994254	1.03426	1.02977	0.982932	1.00731	1.01703	0.999154	0.994946	1.02278	0.99143	1.00864	1.00227	1.01004	1.03777	1.00373	1.00029	1.02815	0.976465	1.00767	0.990371	1.00673	1.00959	1.00588	1.02325	1.01321	1.01912	1.02666	0.99881	0.996395	1.03424
cgp_0974	0.990243	1.03844	1.01572	1.00611	1.01986	0.994259	1.00594	0.996046	1.02189	0.980247	0.999312	0.98341	1.00974	0.976117	1.00701	1.00915	1.00807	1.00291	1.02831	1.00492	1.00113	0.997115	1.00489	1.01457	1.00656	0.989892	1.01353	0.997979	1.01413	0.991746	1.01527	1.02293	0.994143	1.02523	0.990758	1.02087	1.03166	1.00614	1.00396	1.01746
cgp_0076	0.980072	1.0068	1.00414	0.988754	1.01414	1.00957	1.02223	1.02104	1.01435	0.994074	1.04198	1.03189	1.00929	1.02675	0.991456	1.00748	1.00546	1.0272	1.03285	0.993573	0.995943	1.01983	1.01897	1.064	1.02263	1.01777	1.02088	1.02587	1.0066	1.00301	1.04387	1.0175	1.03773	1.02075	1.03922	1.03576	1.00649	1.03316	0.994143	0.993651
cgp_2666	0.985375	0.974494	1.00958	1.05363	1.00376	1.03455	1.0683	1.04998	1.00935	0.980608	1.02735	1.04154	1.00565	1.00764	0.983328	1.02017	1.0057	0.99687	1.02255	0.978424	1.02056	1.02743	0.993884	1.03374	1.03054	1.03612	1.00975	1.01246	1.00369	1.02246	1.02901	1.01262	1.01899	1.02866	1.0184	0.989065	1.01345	1.02127	0.995659	1.00833
cgp_2722	0.965616	1.01923	1.03297	1.00829	1.00369	1.00178	1.03685	1.0195	0.996637	1.01181	0.982329	0.994381	1.01411	1.03213	0.97747	0.947795	1.02496	1.01993	1.0092	0.996838	1.01422	1.02906	0.981043	0.998227	1.0135	0.997071	0.992918	0.99875	0.997664	0.998453	1.02787	0.984717	1.00375	1.01419	1.02105	1.0157	1.02187	1.00887	0.98967	1.01811
cgp_0614	1.00182	0.997123	0.991017	0.972679	0.986352	1.02721	1.0462	0.98216	0.985563	1.02079	1.02241	1.03497	0.994072	1.0425	1.00636	0.977545	1.01585	1.01309	1.01247	0.948887	0.996934	0.98139	0.984652	0.995128	1.03215	1.02215	0.977314	1.01351	0.969669	1.01277	1.02357	0.998912	1.00221	1.01057	1.0399	0.989288	1.00424	0.99962	1.00795	1.00783
cgp_0404	1.04926	1.01395	1.01278	1.04898	1.02154	1.03254	0.98735	0.986673	1.03384	0.987141	1.05104	1.00345	1.03557	1.00102	1.02132	1.02578	1.0042	1.0168	1.04019	0.952073	0.99503	0.978554	1.02935	1.02413	1.02963	1.02242	0.99557	1.03247	1.00646	1.04317	1.01212	1.03462	1.01955	1.0264	1.02404	1.04545	1.05014	1.00228	1.02531	1.03471
cgp_3318	1.07165	1.02999	1.04488	1.02424	1.01959	1.03109	1.01536	1.01539	1.03284	0.979539	1.01341	0.99533	1.00924	0.998955	1.01008	1.01022	1.01661	1.04781	1.0281	0.977651	1.02811	0.966592	1.03448	1.03803	1.0137	1.00889	1.02269	1.00229	1.02805	1.03046	1.00069	1.02792	1.01522	1.00155	0.988644	1.01978	1.03299	1.02275	1.01479	1.03444
ureA	1.05367	1.01224	1.01952	1.02495	1.00833	1.02441	1.02226	0.996604	0.997061	0.991227	1.02895	1.03281	1.0262	1.02915	1.04763	1.02565	1.01091	1.01696	1.00774	0.969618	1.02107	0.969619	1.05526	1.05845	1.02626	1.01235	0.988249	0.999435	1.00452	0.994813	1.0289	1.02287	1.03155	1.0022	1.02155	1.01155	0.974102	0.993027	1.03521	1.03552
cgp_0270	1.03564	1.00196	1.00136	1.04323	1.03579	1.00153	1.01811	1.01859	1.02356	1.03411	1.03334	1.04669	0.995811	0.986282	1.02999	0.994189	1.00389	0.991497	1.04022	0.994823	0.993356	0.967438	1.01887	1.05708	1.03923	0.967516	1.01118	1.01566	0.978579	1.02924	1.0379	1.02525	1.01299	0.995271	1.01093	1.04871	1.03098	1.02268	1.03191	1.0362
cgp_3344	1.03751	1.01327	1.00375	0.996089	1.01546	1.0219	1.00008	1.00771	1.03491	1.0234	1.05033	1.03725	0.998914	1.02273	1.00726	0.994171	1.02477	1.03157	1.02276	0.969621	1.04658	0.992484	1.01733	1.02526	1.01809	1.01258	0.983362	0.993547	0.993468	0.980532	1.02802	1.01029	1.01788	0.985326	1.02284	1.05502	1.03104	1.04549	1.05104	1.01642
cgp_3292	1.04296	1.03379	1.01701	1.03715	1.03434	0.992863	1.02047	0.994943	0.992359	1.02498	1.06314	1.02392	1.00299	1.00244	1.01269	1.01837	1.02226	0.977375	1.00451	1.0235	0.999447	1.00535	1.05728	1.05398	1.00404	1.00581	0.96696	0.969391	1.00158	0.982954	1.00459	1.01624	1.01575	1.02686	0.988201	1.06638	1.0198	0.99013	1.01242	1.03787
cgp_2745	1.03985	1.01436	1.02537	1.01742	0.98905	1.04044	1.00846	0.98508	1.02524	1.0084	0.998588	1.05148	1.01481	1.00175	1.00025	0.987872	1.02968	0.97635	0.993385	0.955797	0.955094	0.977893	1.03149	0.980742	0.977824	1.01653	0.978805	1.01057	1.01627	1.00433	0.972513	1.01945	0.967242	0.971733	1.01978	1.05227	1.03502	0.986976	1.00741	1.00921
cgp_0900	0.960317	0.997896	1.02885	1.03019	1.01557	1.0569	1.02685	1.02682	1.01719	0.98363	1.05149	1.08816	0.991046	0.949315	1.01843	1.00067	1.00724	1.01124	1.01386	0.990395	0.994085	0.980165	1.03749	0.977131	1.06448	1.00129	1.01657	1.01311	1.04699	0.995104	0.998877	1.01701	1.0604	1.02069	1.03732	1.04847	1.02814	0.983878	1.01222	0.9924
cgp_1143	1.02649	0.983012	1.00388	1.02962	1.00613	1.04743	1.00408	1.02561	1.01223	0.975161	1.04737	0.99947	0.956499	0.948336	1.02082	0.95843	1.0057	1.03911	1.02057	1.03867	1.00903	0.970289	1.06068	1.01296	1.03936	1.00693	1.035	0.959896	1.03988	1.03761	0.98502	1.02594	1.01803	0.982036	1.03563	0.973568	1.04964	1.04361	1.0043	1.02801
cgp_1192	1.02244	1.01041	1.02433	1.01305	1.0153	1.05109	1.02802	1.04402	0.994639	0.985629	0.984003	1.04124	1.03921	1.00988	1.02696	1.01248	1.02582	0.996029	1.01264	1.00396	0.995273	0.972966	1.00925	0.989677	1.05382	1.04507	1.00374	0.993433	1.02909	1.03024	1.01881	1.01369	0.977344	1.01661	1.03996	1.04901	1.00442	0.990086	1.00473	1.03163
murA	1.02419	1.02312	1.05298	1.01918	1.03699	1.04212	1.04031	1.01816	1.02274	0.994811	0.98846	1.00045	1.00682	0.981751	0.997983	1.03319	1.02906	1.00342	1.00373	0.990363	0.99104	0.974687	1.0112	1.01121	1.01791	1.02852	1.00624	1.00367	1.02887	1.02412	1.02405	1.01493	0.964494	1.00071	0.997712	0.979098	0.982773	0.994731	1.02293	1.04042
cgp_2638	1.01606	1.01602	1.03107	1.01564	1.00316	1.02112	1.00467	1.02939	1.02215	0.996906	1.01033	1.03551	1.00448	1.03012	0.988325	0.994585	1.04487	1.0255	1.02333	1.03868	0.991308	0.940906	1.0317	1.01332	1.0295	1.01999	1.02274	0.972885	0.998763	1.03887	1.02062	1.04051	1.01415	1.04155	0.972208	0.998321	1.00429	0.974725	1.0089	1.03176
tdcB	1.02368	1.03103	1.05176	1.04293	1.00733	1.02807	1.05821	1.04118	1.01224	0.983042	1.03318	1.01775	0.988884	1.01072	1.00124	1.00299	1.00347	1.00047	0.993959	1.0333	1.04783	0.961184	0.970593	0.960674	0.993409	1.03254	1.02249	1.02007	1.01637	1.02717	1.01215	1.02387	1.00152	1.02195	1.00738	0.993259	0.982528	0.987272	0.999618	1.01242
cgp_1228	0.96029	1.00573	1.02112	1.03726	1.01219	1.0542	1.04688	1.04568	1.01852	1.02298	1.0125	1.00986	1.01904	1.00898	1.00693	1.01935	1.01898	1.0159	1.00465	1.02004	0.968284	0.945547	1.00582	1.02135	1.04857	1.04877	0.99548	1.00292	1.02605	1.01127	1.03105	1.04297	1.02121	1.00084	1.02309	0.994644	1.00492	1.01274	1.00758	0.991464
cgp_1485	0.948975	1.02832	1.0585	1.02833	0.997981	1.03586	1.04202	1.04633	0.986441	1.01333	0.97697	1.01968	1.00567	0.967354	1.01606	0.98735	1.01295	0.986645	1.00659	1.00861	0.96854	0.971937	0.958722	0.988848	1.02336	1.02871	0.998914	0.999342	1.01325	1.02686	1.02404	1.04391	1.04327	1.01737	1.01372	0.998965	1.03773	0.990171	0.962764	1.00382
cgp_2159	0.969892	1.01424	1.03075	1.01066	0.984039	1.01755	1.00454	1.0041	0.989245	0.96226	1.02614	1.00323	0.995948	0.987805	0.999169	1.02416	0.982707	0.987639	0.959801	1.01051	0.992093	0.984943	0.976573	0.980698	1.02216	1.02037	1.01383	1.04074	1.03044	1.01141	0.99951	1.00745	1.0515	0.996184	0.991607	0.989891	1.05649	0.99568	0.993484	1.00216
cgp_0578	0.945736	1.02332	1.00648	1.00099	0.965762	1.01876	1.00406	1.00797	0.9691	0.978769	1.02799	1.0123	1.00294	1.01599	1.0099	0.991495	1.00449	0.973092	0.969579	1.02932	0.976919	0.95537	0.999207	1.00756	1.02938	0.99391	0.992432	1.00628	1.02092	1.00869	0.987478	0.968638	1.03556	1.01986	0.976291	0.989944	1.01633	0.983238	1.00488	0.990148
cgp_0785	1.01517	1.03447	1.0409	1.00939	0.994564	0.999419	1.01222	0.992796	0.992905	1.00374	0.98179	1.02337	1.0211	0.982325	1.01612	1.01048	1.00016	0.991939	0.971066	1.04678	1.00912	0.993377	1.02123	1.00449	1.02043	0.977084	1.0282	1.04091	0.97601	0.967872	1.00758	1.00082	1.05831	1.00772	0.970902	1.00331	0.976199	0.98475	0.990181	1.01334
cgp_1577	1.01893	1.03273	1.0102	1.02138	0.987739	1.01861	1.0022	1.02732	0.960644	0.93589	0.974918	1.02086	1.00893	0.946822	1.02939	1.01194	1.00819	1.01441	1.00779	1.04405	0.99275	0.968384	1.01837	1.0304	1.01918	1.03164	1.03251	1.02827	1.02981	1.04146	1.02185	1.0402	1.02237	1.04496	0.982667	0.984033	1.05008	1.0035	1.02063	1.00176
cgp_1578	1.01164	1.03379	1.01051	0.977429	0.978915	1.03066	1.03289	1.01611	0.986899	0.931698	0.99325	1.02906	0.981089	0.956276	1.0326	1.00449	0.985392	0.996611	1.00589	1.00355	0.979431	0.975918	0.995155	0.993278	1.01789	1.00831	1.0212	1.03103	1.0312	1.04681	1.03611	1.02909	1.01657	1.02027	0.978569	0.936962	1.03052	0.997901	1.00568	0.993045
cgp_2341	1.00277	1.01114	1.02569	1.02394	1.02129	1.04169	1.02115	1.0329	1.01981	0.998415	1.02531	1.02466	1.01933	1.01852	1.0164	1.01494	1.03917	0.999527	1.00634	1.00486	0.971194	0.99663	1.00924	0.964572	1.00369	1.01028	1.0353	1.01463	1.02296	1.03768	1.02033	1.03712	1.02483	1.01644	1.02392	1.02512	1.01999	0.994907	0.996362	1.0013
tex	1.01093	1.00216	1.03602	1.02786	1.02724	1.02313	1.03808	1.0033	1.00402	0.976458	1.0325	1.0197	1.02193	1.01881	1.01336	1.01115	1.0185	1.00526	1.01774	1.02318	0.947718	0.956631	0.982972	0.961473	0.995143	1.01397	1.03296	0.998622	1.00535	1.02958	1.0197	1.01472	1.02502	1.03173	1.02235	1.01539	1.01545	0.991305	1.00046	1.00472
cgp_2172	1.01578	1.00674	1.00921	1.00794	1.04845	1.01622	1.03276	1.01926	1.00539	0.981501	1.03347	1.02642	1.07785	1.02582	1.03124	1.0207	1.03543	1.03568	1.03901	1.04644	1.01345	0.974259	1.02937	0.954603	1.00538	1.0079	1.01037	0.993423	1.02761	1.00645	1.01956	1.00871	1.02702	1.03274	0.991018	1.02081	1.04523	0.989806	1.02513	1.01661
cgp_1717	1.00571	1.02122	1.02877	1.018	1.02375	1.04037	1.02106	1.04362	1.03332	0.961713	0.97351	1.00394	1.04432	0.990964	1.00562	1.0064	1.0293	1.01152	1.00556	1.0085	1.00479	0.989	0.979249	0.950526	1.04527	1.02309	1.05556	0.997209	1.05247	0.997081	1.01374	1.02149	1.05677	1.02685	0.96119	1.00954	1.04607	0.973439	1.02383	1.00658
serA	1.0352	1.02555	1.03324	1.03731	1.03493	1.04888	1.04906	1.02271	1.02033	1.01676	0.998953	1.03462	1.015	1.03216	1.04372	1.04597	1.02452	0.99859	0.98526	1.04133	1.02208	1.00326	0.996272	1.02223	1.02792	1.04264	1.03688	1.03474	1.04275	1.0259	1.04844	1.04116	1.0152	1.02957	0.974268	1.0138	1.02776	1.01899	0.997522	1.02373
narI	1.02372	1.05206	1.03226	1.03002	1.03189	1.04741	1.02887	1.03893	1.01742	0.99082	0.981098	0.995321	1.02982	1.00498	1.01491	1.05561	1.02145	1.00141	1.02243	1.03744	0.994983	0.977754	0.999168	0.970722	0.99587	1.05538	1.02799	1.01082	1.04843	0.991052	1.04905	1.03631	1.01097	1.04108	0.993758	1.0005	1.03029	1.02363	1.01287	0.997107
cgp_1626	0.991466	1.00845	1.00082	1.08037	1.03489	1.04137	1.02433	1.03266	1.05313	0.98739	1.0162	1.00835	1.04219	1.02065	1.04355	1.0411	0.989431	1.00899	1.0074	1.05997	0.986568	0.969315	1.00978	0.965993	1.00929	1.0374	1.02787	1.04574	1.01015	1.01482	1.05126	1.02011	1.0134	1.0162	0.953846	1.02861	0.9993	1.0275	0.976704	1.02828
cgp_2593	1.03647	1.03146	1.04418	0.996997	1.00644	0.987933	1.00951	1.01773	1.01377	0.954458	1.03561	1.03376	1.02182	1.01944	1.00033	1.00581	0.979675	1.01966	1.00911	1.09256	0.97532	0.995981	0.967791	0.989169	1.07961	1.08049	0.999903	0.993031	1.03148	1.01908	1.01121	0.981949	1.02854	1.0206	0.993307	1.02116	0.97195	1.009	0.984668	1.03186
cgp_3120	0.963532	1.01049	1.01633	1.01852	1.0087	1.0293	1.048	1.04464	1.00267	1.0099	1.00648	0.945052	0.989661	0.998232	0.9974	1.0113	1.03954	1.00489	1.01336	0.960441	0.981151	1.01257	0.983843	1.00449	1.01868	1.01148	0.983544	0.971896	1.00161	1.03032	1.00856	1.01767	0.99512	0.996756	0.996947	1.01573	1.02223	1.01581	1.00393	1.03145
cgp_0269	0.987904	1.01475	1.00959	1.01234	1.01571	1.01642	1.02463	1.04841	0.996507	0.999879	1.01905	0.973516	0.977226	0.967175	0.989767	1.0198	1.01115	1.00291	1.01439	0.94277	0.977358	0.973604	0.95799	0.992247	0.999085	1.02016	0.992844	1.0004	0.992383	1.00812	1.01539	1.00376	1.00434	1.00547	1.00982	1.00211	0.984128	0.99765	1.01742	1.0023
cgp_2474	0.996613	1.01742	0.980696	1.00802	1.00472	0.985751	1.02912	1.01944	0.999681	0.978632	1.0019	0.948352	1.0122	0.983037	0.991982	0.979622	0.983648	1.00107	0.994723	0.954375	0.990241	0.99498	1.01183	0.975327	1.02227	0.989125	0.960918	0.996928	1.00282	1.02571	1.01425	0.987011	1.02651	1.00064	0.994824	1.03975	0.987716	1.00144	0.998652	1.00835
cgp_0659	0.983576	0.992967	1.02353	1.03307	1.00645	1.02364	1.05893	1.01368	0.992477	1.01437	1.04618	0.960314	1.05304	0.959196	1.00145	1.00667	1.0399	0.966995	0.999389	0.969401	0.981663	0.954595	0.982614	0.981147	0.999696	1.01659	0.971013	1.0153	1.00083	0.996683	1.01692	1.02356	1.00773	1.00708	0.980054	1.04167	0.990187	0.992227	0.989719	1.00365
cgp_0010	0.987335	1.01629	1.0358	1.05331	1.02283	1.01848	1.03201	1.03079	1.02263	0.986609	1.09334	0.930635	0.992533	0.996707	1.001	1.02043	1.04354	1.02692	1.03398	0.972874	0.989702	0.958737	1.00474	1.03054	1.01564	1.00926	1.00649	0.994409	1.01069	0.997059	1.01238	0.990628	1.02344	1.01327	1.01439	1.04844	1.00112	1.04208	1.02328	1.00584
cgp_0073	1.04667	1.02911	1.03637	1.02803	1.01121	1.00523	1.01897	1.0224	1.02337	1.00393	1.02818	0.974591	1.00309	0.969938	1.0236	1.03759	1.00358	1.02585	1.02207	0.934463	1.00983	0.96653	1.01218	1.01978	0.946802	0.98427	1.01933	1.02158	1.00841	1.0344	1.00958	1.00576	0.995953	1.01619	0.999103	1.06492	0.983453	1.02339	1.02037	1.02374
cgp_0971	1.00558	0.999343	1.00487	1.00952	0.986872	1.01387	0.953901	1.0005	0.995656	1.02218	1.02721	0.911566	0.985566	1.0256	1.02314	1.04201	0.984324	0.995941	1.02365	0.980791	1.01601	1.00826	1.00487	1.00485	1.0348	0.977564	1.0145	0.999262	1.03058	1.02534	0.984418	1.01918	1.03422	1.00833	0.980704	1.03486	0.932982	0.985698	1.04159	1.01529
cgp_2922	0.986586	0.981939	1.02032	1.0118	1.03459	1.01939	0.983406	1.00301	1.03313	0.979114	1.00756	0.911932	0.982341	0.978338	0.986492	1.03583	1.013	0.980022	1.03142	1.00981	0.955127	0.948653	1.04671	0.971348	1.02745	0.964291	1.00652	1.01501	1.00975	1.02059	1.00909	1.03671	0.985982	0.979652	0.993647	0.971595	0.94567	0.999226	1.01649	1.0327
cgp_2386	0.989618	1.02885	1.00659	1.04936	1.00917	1.0836	1.03354	1.0399	1.01563	0.923585	1.01929	0.988255	1.0193	0.999181	1.02719	1.00508	1.05689	0.989727	0.975303	0.958686	1.01974	1.01909	1.01776	1.02178	1.06897	1.04805	1.01424	1.03608	1.05324	1.03588	0.978445	1.03476	0.999294	1.00129	1.01099	1.00071	0.956438	0.992649	1.01413	1.02581
cgp_1193	0.99283	1.04061	1.00476	0.998928	0.992487	1.03314	1.01553	1.03793	1.00488	0.9509	1.03512	0.982802	1.00836	0.961388	1.03371	0.968499	1.03154	1.01707	0.975306	0.934375	0.989614	1.00291	1.01069	0.991447	1.01386	1.0132	0.99977	1.02044	0.977413	0.99319	0.96203	1.02806	0.995699	1.04532	0.984721	0.96808	0.98255	0.994954	1.00045	1.01571
cgp_3274	0.951357	1.02763	1.05487	0.992468	1.00237	1.01377	1.04401	1.04145	1.00947	0.931155	1.04188	0.99929	1.0238	0.994331	1.02368	1.03477	1.02227	0.995283	0.967237	0.946607	1.00141	0.966064	1.01219	1.02302	1.00591	1.03838	1.01626	0.999397	1.02583	1.01924	0.994416	1.02775	1.05859	1.00055	1.01678	1.01518	0.93355	0.979497	1.02857	1.00555
cgp_0436	0.974559	1.00268	1.04369	1.01676	0.994763	0.989622	1.04237	1.01174	0.993305	0.970004	0.995533	1.00565	0.995388	1.02467	0.967386	1.0374	1.02356	0.998716	0.989112	0.986584	1.00927	0.936349	0.974514	1.01641	1.01374	1.04023	1.02631	0.988949	1.0218	0.998947	0.995617	0.991361	1.04763	0.995008	1.02078	0.983623	0.966843	0.986817	1.00953	1.0029
uvrA	1.02636	1.02369	1.0424	1.03316	1.02238	1.04637	1.03471	1.04355	1.02762	1.03172	1.00678	1.03717	1.05292	1.01184	1.03417	1.02834	1.04071	1.00969	1.02375	1.03412	1.0089	0.991305	0.98101	0.963547	1.01593	1.01456	1.02899	1.02834	1.03919	1.04075	1.03863	1.04519	1.03081	1.04085	1.03509	1.02896	1.04646	1.012	1.02015	1.01831
cgp_2100	1.03902	1.0146	1.04064	1.02248	1.02219	1.04316	1.03715	1.03344	1.0395	1.01414	0.994658	1.0369	1.03492	1.03059	1.02776	1.02687	1.02925	1.00822	1.01419	1.0246	1.02845	1.01447	0.989913	0.967146	1.02142	1.01779	1.03657	1.0197	1.00315	1.0157	1.02901	1.04186	1.01651	1.04091	1.0277	1.03796	1.02884	1.01537	1.01575	1.01463
uriR	1.02615	1.0017	1.04989	1.03502	1.01848	1.0462	1.03884	1.04962	0.996454	0.9985	0.985469	1.04402	1.01913	1.03078	1.02662	1.02533	1.05224	1.03094	1.01429	1.02468	0.995058	1.01204	0.998557	0.997174	1.02087	1.01607	1.02415	1.01365	1.02218	1.03627	1.02931	1.02752	1.06624	1.03634	1.04514	1.04688	1.04477	1.00746	1.02109	1.00238
chaA	1.03843	1.01054	1.06015	1.02706	1.0173	1.05206	1.02383	1.03446	1.03614	0.998956	1.02141	1.04056	1.03636	0.990045	1.002	1.00123	1.03077	1.00153	1.00948	1.0384	1.0251	1.01643	1.02636	0.98862	0.998607	1.01689	1.01293	1.01895	1.0341	1.03668	1.03739	1.03917	1.03895	1.03516	1.02911	1.02382	1.06219	1.00483	1.00751	0.994938
cgp_2733	1.01906	1.00988	1.0386	1.03018	1.02524	1.02481	1.03418	1.04689	1.02446	1.00264	1.02737	1.04169	1.01995	0.987675	1.01319	1.02136	1.0353	0.994549	0.99843	1.04935	1.0073	0.986605	0.993618	1.00599	1.0047	1.03194	1.00728	1.0103	1.05212	1.00705	1.00942	1.02516	1.02792	1.05915	1.00122	1.01867	1.06662	0.995214	1.00974	1.00126
ssuD2	1.02305	0.989612	1.03398	1.04705	1.02046	1.03222	1.03662	1.02869	1.02866	1.00745	1.00112	1.00982	1.0156	1.01316	1.01671	1.03173	1.02589	1.01084	1.01052	1.02366	1.012	1.00413	1.03868	1.01519	1.01735	1.03259	1.01514	1.00552	1.0438	1.01549	1.0381	1.01828	1.00837	1.02431	1.03717	1.01772	1.02916	1.00732	1.01453	1.01375
cgp_1292	1.02878	1.00046	1.03101	1.03832	1.03957	1.05194	1.03838	1.03705	1.00763	0.994043	1.01644	1.03608	1.02121	0.98907	1.02286	1.03244	1.01872	1.01841	1.01717	0.988349	1.00035	1.00919	1.00402	1.037	1.01007	1.03365	1.00768	1.02036	1.03738	1.02349	1.01474	1.01362	1.01819	1.01777	1.02216	1.0236	1.02559	1.0081	1.01354	1.00934
hisB	1.0386	0.991514	1.02807	1.03411	1.01846	1.03611	1.0247	1.0358	1.02592	0.997232	1.02087	1.04707	1.01894	1.0068	1.02443	1.00959	1.03541	1.01829	1.03875	1.01877	1.03924	1.03853	0.994669	1.00534	1.02145	1.01099	1.01965	1.00675	1.0434	1.0225	1.01946	1.01364	1.00764	1.05483	1.01214	1.01975	1.04508	0.993969	1.00154	1.01955
cgp_1559	1.04176	0.99948	1.04205	1.03358	1.01829	1.06559	1.03032	1.03787	1.01897	1.00649	1.01511	1.04478	1.02721	1.00542	1.03373	0.999087	1.023	1.02975	0.995703	1.04341	1.04262	1.0101	1.00751	0.99908	0.993574	1.02575	1.0376	1.01252	1.03351	1.03194	1.02838	1.02382	1.04004	1.02807	1.03421	1.0136	0.995763	1.01862	1.01449	1.01819
tctC	1.02761	1.01829	1.02692	1.0336	1.02797	1.04926	1.03829	1.03294	1.01321	1.0068	1.0285	1.03712	1.01348	1.01504	1.00319	1.00679	1.03629	1.01617	1.01881	1.03972	1.02742	1.03229	0.996123	1.02594	1.01448	1.03873	1.00594	1.03407	1.02041	1.02608	1.01319	1.01256	1.04557	1.02406	1.01718	1.02755	1.003	1.01758	1.02206	1.01963
cgp_1541	1.04411	1.03964	1.05009	1.00667	1.01968	1.05654	1.02163	1.06719	1.00647	1.00952	1.01127	1.04795	1.00881	1.0137	1.02152	1.04771	1.03972	1.03184	0.996623	1.04901	1.01112	0.988958	1.00938	0.987266	0.971989	1.03517	1.00301	0.985938	1.00224	1.03508	1.01594	1.03306	1.01183	1.02488	1.06516	1.04196	1.03011	1.01768	1.0125	1.01321
cgp_1399	1.05103	1.00589	1.02447	1.01923	1.00163	1.04491	1.04469	1.03535	1.03296	0.973519	0.989656	1.05041	1.02008	1.0189	1.02041	1.03625	1.03546	1.02434	1.0113	1.0481	1.01741	1.01733	1.0145	0.980528	0.985624	1.02483	1.02455	1.01371	1.02168	1.02094	1.01757	1.02338	1.00759	1.02546	1.03012	1.02919	1.02885	1.01585	1.00543	0.996198
cgp_2255	1.02738	0.991441	1.04105	1.05653	1.0089	1.02948	1.04993	1.05552	1.00556	0.998446	1.02832	1.01748	1.01282	1.01557	1.03186	1.03177	1.04806	1.0272	0.996195	1.02075	1.01802	1.00008	1.06637	0.969209	0.978928	1.02632	1.02551	0.986664	1.03289	1.0354	1.02792	1.03985	1.03149	1.03779	1.02747	1.03642	0.989048	0.993981	1.01759	1.01451
cgp_1505	1.07178	0.988857	1.03204	1.03987	1.01602	1.04599	1.05131	1.03328	1.04388	0.976049	0.994541	1.04704	1.06031	1.02776	1.00827	1.03387	1.02108	1.00254	1.00468	1.0523	0.964348	1.00234	1.02594	0.987338	1.00152	1.04568	1.001	0.995424	1.02371	1.02883	1.0272	1.00559	1.04678	1.00818	1.03789	1.01212	1.00937	0.981107	1.01702	0.965359
cgp_2116	1.04797	1.02116	1.05395	1.06384	1.02803	1.0325	1.06481	1.02238	1.00737	0.996061	0.993478	1.03833	1.01056	1.01202	1.00419	1.03791	1.04158	1.03277	1.00115	1.05449	1.0694	1.08839	0.996893	0.978756	1.00513	1.03896	1.03268	0.995275	1.012	1.03693	1.00696	1.02852	1.03714	1.06079	1.00816	0.97843	1.02103	1.00176	0.999843	1.02394
cgp_1303	1.06325	0.993498	1.02446	1.00888	1.0217	1.04084	1.01483	1.06027	0.97439	1.04713	0.973617	0.989954	1.03325	1.0116	1.02217	1.04136	1.03871	1.01936	1.0203	1.04742	1.03459	1.01116	0.993432	0.959876	1.02439	1.05311	1.0113	1.03058	1.07245	1.04482	1.02288	1.03742	1.08401	1.03825	1.01195	0.93954	1.01215	0.978761	1.00718	1.01413
cgp_1703	0.982474	1.03147	1.03397	1.01555	1.02218	1.03522	1.04768	1.0277	1.03275	0.978692	0.927778	1.02417	1.02486	1.03059	1.00124	1.02813	1.03886	1.00812	1.00245	0.992716	1.03252	0.987644	0.98717	0.99124	0.991174	1.02064	1.01608	1.01852	0.999385	1.0314	1.02341	1.04413	1.02022	1.0149	1.01183	1.00884	1.03109	0.990334	0.983079	0.977516
cgp_0874	0.967471	1.01385	1.0248	0.995991	1.00157	1.02839	1.02204	1.0014	0.979577	1.0047	0.936896	1.04043	1.0385	1.03749	1.00053	1.01158	1.01321	1.00216	1.03258	1.03201	1.01894	1.00231	1.01331	1.01331	1.01778	1.01795	0.99749	1.04218	1.0003	1.00853	1.00252	1.00282	1.01585	1.0104	1.00368	1.03935	0.999782	0.979048	1.01989	0.980538
cgp_2777	1.02898	1.01276	1.01791	1.0025	1.02685	1.02396	1.03163	1.01392	1.01344	1.0005	0.895438	1.02956	1.02781	0.985044	1.01026	1.01647	1.02245	1.03852	1.05131	1.03678	1.01597	1.01508	1.02996	0.979816	1.02738	0.992335	1.01501	1.01319	1.00445	1.03373	1.00219	0.995568	1.0025	1.018	1.01775	1.02026	1.01107	1.01794	1.00472	1.01796
cgp_1384	1.02597	1.01913	1.0089	0.98415	0.984391	1.00317	0.969373	1.04114	1.008	0.935732	0.974902	1.00499	1.03522	1.07027	1.02584	1.01397	1.00031	1.00487	1.01128	1.04296	1.01692	0.991581	0.999442	1.00161	1.03684	1.03368	1.00966	1.0271	0.987013	1.0202	1.01399	1.02391	0.990568	1.03994	0.983104	1.00806	1.02276	1.01281	1.00119	1.01411
hom	1.03625	0.988061	1.02266	1.0155	1.01732	1.0306	1.01102	1.02099	0.998668	1.00335	0.928739	1.00707	1.0247	1.08441	1.01838	0.979952	0.985449	0.969139	0.961505	1.04115	1.00587	0.999983	0.998504	1.00308	1.02658	1.02455	1.00055	1.01344	1.03185	1.0234	1.01828	1.02348	1.02213	1.00546	0.99291	1.00109	1.00909	1.00087	0.98599	0.992263
cgp_1139	1.00093	1.01861	1.04387	1.03826	1.01711	1.01355	1.02705	1.05801	1.01553	0.977962	1.01176	1.01257	1.01441	0.960983	1.00201	1.01988	1.04773	0.984638	1.00804	1.06171	0.970133	0.985229	1.03328	0.980812	1.00766	1.02422	0.971742	1.00853	1.02913	1.00576	1.01511	1.01806	1.02625	1.01179	1.01558	0.985873	0.957189	0.990498	1.01221	0.999169
cgp_2648	1.01198	1.0152	1.03072	1.03576	1.02981	1.01623	1.04827	1.02473	1.03635	1.03647	0.98131	0.959413	0.990454	1.0251	1.00487	0.972073	1.03204	0.985857	1.01019	1.02997	0.970431	0.986686	1.03593	1.00932	1.02262	1.01662	1.01472	1.04385	1.03713	1.01101	1.00144	0.995075	1.00949	1.03227	0.995887	0.993136	0.943912	0.972005	0.993807	1.00303
cgp_1742	1.03274	1.00863	1.02577	1.01206	1.00727	1.02809	1.00273	1.05015	0.993416	1.01923	1.02586	0.957783	1.01587	0.926916	1.02643	1.01488	1.01058	0.966155	0.953557	1.0191	1.03372	0.997548	1.00912	1.01255	1.02525	1.05515	1.04448	1.00164	1.05709	1.04	1.04798	0.997386	1.00644	1.0306	0.972942	1.01563	0.967133	0.945715	0.988056	0.995831
cgp_1000	1.02728	0.973085	1.06572	1.00429	1.01415	1.08126	1.0409	1.05162	0.986994	1.05863	1.00515	0.971609	1.00847	1.00733	1.04022	1.01004	1.03908	1.00463	1.01597	1.02511	1.00387	0.991431	1.03933	1.03349	1.02033	1.05967	1.00161	0.953738	1.02117	1.03282	1.01718	1.05265	0.976378	1.04763	0.971868	0.99555	1.02641	0.976456	0.987589	0.972746
cgp_1070	1.00118	1.02859	1.0587	1.02058	1.022	1.03536	1.01885	1.05775	1.02196	1.02527	0.980989	1.06165	1.01899	1.03497	1.01572	1.0405	1.03584	1.03977	1.05101	1.03016	1.00335	0.985398	1.04144	1.03603	1.05365	1.02561	1.01756	1.00314	1.04389	1.02873	1.02228	1.05451	1.02412	1.00462	1.01629	0.971045	0.93237	0.996704	1.03223	1.01781
cgp_2215	1.03764	1.00833	1.05168	1.04396	0.985691	1.04495	0.996459	1.03082	1.01894	0.991483	1.02596	1.06047	0.99532	1.00004	1.01561	1.025	1.06586	1.00495	1.04058	0.97233	1.00334	1.0606	1.04517	0.986432	1.03744	1.05554	1.02434	1.03288	1.05511	1.02721	1.04625	1.05862	1.03575	1.03664	1.00114	1.00135	0.932015	0.985373	1.02959	0.974233
cgp_0511	1.04142	1.03247	1.02941	1.01062	1.00306	1.00004	1.00484	1.02285	0.996879	1.00311	1.03236	1.03542	0.944567	0.985393	1.01671	1.02773	1.03603	0.985798	1.01113	0.977509	0.982356	1.02208	1.04045	1.0338	1.03162	1.02183	1.02403	1.01796	1.07741	1.05102	1.06005	1.00513	1.03029	0.978533	1.00258	1.0108	1.00375	1.00869	1.00026	0.996066
cgp_2973	0.976433	1.01606	1.02346	1.01472	1.02656	1.03367	1.02578	1.02979	1.02375	0.998033	1.01254	0.978591	1.0308	1.03332	1.00831	1.02687	1.04563	1.01167	1.02014	1.03434	1.00775	1.00294	1.02404	1.0167	1.02602	1.0209	1.01311	1.00681	1.01316	1.01941	1.00814	1.03726	1.01847	1.00665	1.00717	0.997146	1.03149	1.01227	1.00802	1.01006
vanB	0.985646	1.01156	1.01024	1.02368	1.03333	1.03741	1.03201	1.02544	1.01553	1.00601	1.00748	0.969737	1.02557	1.03757	0.998891	1.01842	1.05539	1.00149	1.01455	1.00283	1.01445	1.00829	1.00826	1.00702	0.995301	1.03359	1.00186	0.995286	1.01602	1.04294	1.0045	1.01098	1.0417	1.0048	0.985695	0.997515	1.00616	1.0017	0.996065	1.01682
cgp_2484	0.963671	1.03151	1.02474	1.03242	1.02483	1.03139	1.0327	0.996501	0.980068	0.995866	1.01349	0.987172	1.02224	1.04104	0.976697	1.0193	1.02484	1.00388	1.00647	0.99667	1.01041	1.01569	1.01026	1.01487	1.00977	1.03012	1.00054	0.987265	1.00263	1.03764	1.01599	1.0114	0.990955	1.01044	1.02704	1.03349	1.02526	0.986874	0.999047	1.02695
tfdF	1.00461	1.01822	1.01826	1.02134	1.04801	1.04364	1.02473	1.02762	1.01036	0.964448	0.974706	0.98924	1.02639	1.01903	1.01211	1.00546	1.03353	1.02173	1.00462	1.0382	1.03204	1.00094	0.997045	1.03384	0.98648	1.04108	1.03011	1.00369	0.989125	1.02294	1.03549	0.997519	1.02433	1.01727	1.02394	1.02403	0.993312	0.986985	1.02849	1.01219
cgp_0821	1.01208	0.99825	0.987582	1.01016	0.993648	1.04004	1.02681	1.01602	1.01325	1.0024	0.970861	0.99097	1.02037	1.00914	1.02053	1.00246	1.01867	1.01007	0.998224	1.0129	1.01788	0.996786	1.01867	1.02956	0.980156	1.02064	1.02573	0.9935	0.995598	1.06566	1.03773	1.01816	1.0012	0.994846	0.996097	1.01606	1.0393	0.992343	0.999264	1.01474
cgp_3345	1.00648	0.998089	1.02052	1.02431	0.997506	1.04217	1.02494	1.04768	1.01676	0.987523	1.02315	0.973212	0.994656	1.02385	0.997846	0.985572	1.04941	1.0129	1.02368	0.975272	1.03676	0.997079	1.00749	1.01189	0.982529	1.0158	1.02316	1.01205	1.02909	1.03746	1.02485	1.01593	1.02211	1.00285	1.01521	0.993212	1.02328	0.987078	0.998513	1.01235
cgp_2518	0.974892	1.02274	1.04124	1.02391	0.996677	1.05454	1.0652	1.02955	1.01413	0.986412	0.993598	0.969219	0.987922	1.01169	0.998816	1.01208	1.01454	1.0126	1.00948	1.00744	1.02398	0.996801	0.981601	1.01802	0.975108	0.985675	1.0088	1.01827	1.02496	1.03881	1.00562	1.00836	1.00194	1.01947	1.00808	0.978124	1.02155	0.985011	1.00908	0.989079
cgp_0233	1.00044	1.01813	1.0137	1.01625	1.01461	1.01508	1.02248	1.02035	1.02374	1.01755	1.00188	0.972843	0.985225	1.03571	0.999254	1.02206	1.03502	0.992611	1.02037	1.03502	1.04907	1.03496	1.02722	1.02046	1.00084	1.00216	0.999363	1.00361	1.02211	0.9987	1.00871	1.02569	1.01621	1.00729	1.01276	0.985274	1.01412	1.00263	1.00181	0.993543
cgp_0722	0.989247	1.01382	1.02204	1.01099	1.01516	1.01286	1.02086	1.0117	0.997519	1.01039	1.01387	0.982105	0.976898	1.01093	1.00124	1.00757	1.0081	1.00716	1.01014	1.02273	1.02032	1.03045	1.0004	1.01073	0.991081	1.01586	1.01049	0.99741	1.0073	1.00985	1.00686	1.00253	0.997134	1.00248	1.0073	0.998643	0.980916	0.992274	0.998913	0.997799
cgp_1257	0.987876	0.985596	1.04034	1.03905	1.02864	1.03671	1.03934	1.03944	1.01523	1.0431	0.983534	0.956123	1.00627	1.03802	0.993456	1.00703	1.01982	1.01737	1.00584	1.022	1.00815	1.00922	1.01353	1.03152	1.02484	1.00505	1.00851	0.995017	1.01876	1.01386	1.00646	0.985222	0.984571	1.00909	1.02371	1.01216	1.01561	1.01037	1.01099	0.991409
lrp	0.995321	0.995995	1.00499	1.00107	1.01095	1.01294	1.03577	1.03321	1.01807	1.00074	0.994229	0.940263	1.01124	0.995277	0.961281	1.03286	1.02544	1.01658	1.00926	1.01715	1.00762	1.00617	1.02412	1.03821	1.0158	0.999968	0.979843	0.987869	1.03945	1.00865	1.0461	1.03145	1.01137	1.00406	1.00224	1.01581	0.998418	1.00834	1.01269	1.02818
cgp_2546	0.992764	1.02028	1.00274	0.988859	1.00689	1.03495	1.03634	1.0176	1.02002	1.0084	0.997297	1.01191	1.03082	0.960596	1.0089	1.01037	1.02468	0.99685	1.01354	0.99176	1.01297	0.989709	1.00253	0.999761	1.04225	1.01993	0.995483	0.989932	1.0115	1.02919	1.02458	1.02312	0.98899	0.992442	0.994312	0.996455	0.999428	1.01381	0.991171	1.00353
metX	0.963912	1.00381	1.0136	0.98705	1.01155	1.0234	1.03037	1.00937	1.01332	1.03089	0.98117	1.00536	1.01945	0.981891	1.00909	1.00651	1.03744	1.00807	1.00112	1.00579	1.01464	1.00316	1.02625	1.00903	1.01938	0.999835	0.979874	1.00034	1.00279	0.999413	1.00649	1.0095	0.995667	0.985463	0.998794	1.01581	0.999621	1.01262	1.00906	0.989638
cgp_0733	0.974423	1.00405	1.02491	1.01319	1.00461	1.00841	1.03489	1.02802	0.988003	1.02027	1.02427	0.978258	1.00905	0.9672	1.00581	1.01055	1.02144	1.00149	1.01097	0.989471	1.01905	1.00076	0.988479	1.01096	1.01354	1.03607	1.0056	0.985401	1.03119	1.00943	1.02273	0.996363	1.00177	1.00058	0.98793	1.01106	0.987596	1.00903	1.01583	0.986861
cgp_3329	0.976156	1.00783	1.02381	1.01442	1.00694	1.01351	1.02745	1.02161	1.01278	0.978241	1.0239	0.941825	1.01617	0.974747	1.00725	1.00083	1.02983	1.0098	1.0103	0.987644	1.02039	1.00585	1.00292	1.01756	1.01053	1.0315	0.997753	1.00148	1.01488	1.00705	1.00692	0.997432	1.00023	0.979151	1.01403	0.992556	0.997749	1.00165	1.01807	1.01041
cgp_2960	0.972441	1.01844	1.02135	1.01357	0.989943	1.03651	1.04517	1.04476	1.00495	0.988535	0.987658	1.00538	1.03218	0.993053	1.03303	1.01473	1.04811	1.03214	1.01167	0.967644	1.01763	0.991833	1.02497	1.03679	1.02025	1.03979	1.01417	1.03331	1.02418	1.01241	1.04621	1.01495	1.0066	1.01107	0.999308	1.00302	1.04163	1.01724	1.00249	0.989682
crtYe	0.965398	1.05874	0.996302	1.01155	1.03638	1.05213	1.03771	1.0401	0.99982	1.03378	0.984173	0.955815	0.987395	1.04355	0.98463	1.04449	1.05964	1.02233	1.01602	1.0094	1.03537	0.994347	0.993513	0.987907	1.05368	1.0222	1.02925	1.03186	1.01324	1.02028	1.00997	1.01295	1.01952	1.00715	1.02037	0.998444	1.03524	1.01135	1.02755	1.00483
ureF	0.93988	1.0409	1.01208	0.999778	1.01815	1.00562	1.00843	1.02616	1.02357	1.00566	0.96613	0.966604	1.01212	1.04011	1.03323	1.04445	1.03934	1.00981	1.05006	1.01704	1.00804	0.956149	1.00271	1.02668	1.01298	1.02697	1.00497	1.01628	0.992534	1.03164	1.0138	1.03262	0.989062	0.983441	1.04691	1.03394	0.999895	1.00199	1.00942	0.991955
cgtR6	0.935009	1.05139	1.02681	1.01287	1.0031	1.06268	1.03083	1.03761	1.02561	1.00764	1.01354	1.02915	0.99071	1.01505	0.987092	1.0279	1.05175	1.01776	0.997302	0.965697	0.998509	0.985401	1.0193	1.00184	0.968695	1.01646	0.996722	0.975068	1.00272	1.02161	1.01958	1.03625	1.00464	1.01041	1.03126	1.02332	1.02073	1.01964	1.04304	1.01531
cgp_0485	0.984935	1.02035	1.05592	1.04929	1.01049	1.04011	1.03505	1.01802	1.04016	1.02308	0.977391	1.03228	1.02007	1.00091	1.01165	1.00292	1.04958	1.03499	1.0088	0.9961	1.02067	1.00992	1.0376	1.03612	1.01943	1.04453	1.01266	1.01636	1.04267	1.01321	0.989966	1.05033	1.02035	1.03979	1.0046	1.03329	1.01564	1.03725	1.01264	1.0295
cgp_0431	1.00298	1.03052	1.05606	1.03207	1.01014	1.05333	1.03349	1.05719	1.02395	1.00434	0.948843	0.976548	1.01824	1.02235	1.02339	1.03701	1.04574	1.01707	1.04628	0.994243	1.01082	1.02786	0.995836	1.00212	1.03531	1.01853	1.00414	1.00406	1.03569	1.05745	1.02781	1.01406	1.02578	1.03595	1.00502	1.0352	1.0223	1.01943	1.0164	1.01686
cgp_2106	1.02118	1.01586	1.03418	1.03967	1.06619	1.04482	1.05899	1.02809	1.04443	1.04776	0.995385	1.00688	1.05568	1.04564	1.00129	1.01466	1.03593	0.994243	1.00374	1.01786	1.01125	0.982543	1.00657	0.990087	1.04664	0.997889	1.0052	1.00213	1.02995	1.03279	1.00257	0.997855	1.01375	1.00397	1.02678	1.00702	1.05055	1.00802	1.01709	1.00333
cdaS	0.982753	0.987113	1.04722	1.04398	1.01597	1.03201	1.03297	1.02442	1.042	1.01755	1.01699	1.00124	1.0598	1.04938	1.00027	1.01794	1.03132	1.0269	1.01466	0.97019	1.03331	1.01155	1.0027	0.998755	1.01771	1.00543	1.00251	1.00694	1.00951	0.998205	1.00439	1.03483	0.998289	0.990324	1.01158	0.965406	1.04009	1.00732	1.01016	0.99752
azlD	0.926223	1.00991	1.01537	1.01178	1.04796	1.00536	1.0072	1.01744	1.0252	1.0171	1.04377	1.04559	0.973479	1.03026	1.0153	1.0251	1.03474	1.03549	0.998992	1.0421	1.02719	1.0315	0.974358	1.01824	1.0153	1.03887	1.03371	1.01102	1.00572	1.01837	1.06817	1.02354	0.983876	1.0137	1.04536	1.00969	1.00572	1.0219	0.988298	1.01011
mrx1	0.951028	1.00302	1.01349	1.00112	1.03068	0.993965	1.05236	1.0713	1.0047	0.994551	0.995055	1.03632	1.02946	0.988956	1.05169	1.03058	1.01778	0.999731	1.03637	1.01284	0.983774	0.965329	1.0121	1.01921	1.05008	1.03978	1.02217	0.996083	1.03024	1.02593	1.0348	1.03052	0.961056	0.98251	1.07255	0.959356	0.991012	1.00492	1.01193	0.99526
cyeR	1.03684	1.02104	1.01849	1.04787	0.978938	1.03869	1.04317	1.03806	1.0095	1.04285	1.00511	1.05513	1.00268	1.05737	1.03109	1.00196	1.04991	1.00685	1.00132	1.03241	1.03072	1.02746	1.03115	1.02599	0.952499	1.00037	1.02711	1.06566	1.0489	1.01922	1.01072	1.0029	0.997853	1.0092	1.03428	1.01578	0.943485	1.01506	1.0208	0.997935
ssuI	0.985164	1.01153	1.02463	1.05032	0.9723	1.01783	1.0282	1.04355	0.984038	1.04593	0.954368	1.00205	1.00126	1.03253	1.04338	1.04259	1.01224	1.02975	1.01946	1.02413	1.00353	0.986563	0.991237	1.02286	0.926118	1.04755	0.97867	0.988225	1.04361	1.00449	0.99788	1.01715	0.991558	1.00417	1.05353	0.991198	0.976895	0.973439	0.975341	1.00578
cgp_1396	1.01772	1.04383	1.05122	1.01317	1.04456	1.04738	1.04303	1.036	1.02087	1.05701	0.946531	1.00603	0.983443	1.05004	1.03043	1.01122	1.06353	1.02848	0.991306	0.975198	1.01831	1.02022	0.984569	1.00133	0.982324	1.04583	1.02507	1.02113	1.03023	1.0493	1.05119	1.05381	1.03385	1.01954	1.05862	0.991642	0.965412	1.03858	1.01741	1.03807
cgp_0399	1.01004	1.04772	1.05322	1.0068	1.00845	1.04656	1.02721	1.04031	1.03826	0.988868	1.00794	0.912414	1.02595	1.00235	1.05678	1.03456	1.07494	1.04381	1.0292	0.972887	1.00764	1.00155	1.03739	1.02651	0.979244	1.0566	1.04365	1.01356	1.00513	1.06132	1.00964	1.0108	1.04377	1.05088	1.01351	0.998658	0.984315	1.04769	1.0114	1.05387
cgp_0043	1.06891	0.994504	1.02849	0.990158	1.026	1.04443	1.02921	1.02317	1.02739	0.981008	1.06224	0.923536	1.01313	1.01306	1.013	1.04084	1.01156	1.03897	1.01696	0.987698	1.01577	1.00481	1.05226	1.04365	1.01467	1.04386	1.0248	1.01401	1.01426	1.04212	1.04004	1.02111	1.06175	0.995672	0.998037	0.984985	0.97825	1.0052	1.03668	0.998446
cgp_0952	1.02075	0.995064	1.01414	1.05296	1.01592	1.04293	1.0047	1.04054	0.982621	1.03365	1.0496	0.942983	1.00821	1.01151	1.03409	0.950522	1.03472	1.04229	1.0022	0.982919	0.980476	1.02978	1.04241	1.02511	0.964778	1.02813	1.03965	1.01852	1.03875	1.04673	1.02978	0.998598	1.05182	1.04969	1.04175	1.06815	1.03551	0.987404	1.00376	0.998455
cgp_3204	1.03884	0.991547	1.0022	1.03089	1.01286	1.05735	1.00387	1.02492	0.994183	0.988052	1.01754	0.86772	0.979009	1.06636	1.03358	1.00121	1.05028	1.01693	1.03153	0.957835	1.01153	1.01253	1.01948	0.98782	1.00638	0.993124	1.03711	0.999144	1.05694	1.04436	1.03552	1.029	1.04411	1.03338	1.00685	0.987771	1.03885	1.01176	1.01223	1.00247
cgp_1874	0.996719	1.0121	1.00764	1.03063	1.02609	1.0291	1.04357	1.0364	1.02559	1.01854	1.01922	0.908595	1.02002	1.01588	1.02363	1.00491	1.0304	1.02195	1.02841	0.991252	1.01581	1.00037	0.969842	0.983568	1.02104	1.02626	0.988461	1.02443	1.06224	1.05948	1.016	0.995331	1.0496	1.01437	1.01148	1.05247	1.05709	1.00938	1.01409	1.02459
cgp_3126	0.952066	1.03326	1.0381	1.04275	1.03521	1.05607	1.01895	1.04387	1.00138	1.02195	1.00325	0.956139	1.00973	1.00704	1.0207	1.00298	1.01788	0.99863	0.987917	0.982847	1.00899	1.02307	0.973614	1.00241	1.05567	1.02521	1.004	0.993643	1.0405	1.06966	0.989342	0.991348	1.01704	1.02707	0.987775	1.00502	0.988807	0.999011	1.00415	1.0236
cgp_1285	0.964056	1.02695	1.04555	0.989778	1.02166	1.02613	1.00051	1.03811	1.00043	0.998991	1.03749	0.871319	0.997354	1.03733	1.03343	1.07157	1.03326	1.03404	1.023	1.00967	0.986562	1.01718	0.959972	1.03713	1.03756	1.03709	1.0446	0.992948	1.02974	1.06717	1.01633	1.02143	1.02711	1.03483	1.03831	1.01013	1.0571	0.995295	1.048	1.02683
secN	1.03405	1.03593	1.01606	1.04845	1.02745	1.05113	1.01066	1.06585	1.01432	0.987992	0.962507	0.955375	1.05539	1.0284	1.03356	1.05886	1.04208	1.03891	1.01384	0.988098	1.00505	0.999296	1.04301	1.0194	1.06727	1.00886	1.0027	1.00915	1.0024	1.03793	1.00264	0.942527	1.01575	1.02728	1.03498	0.996459	1.05552	1.01913	1.02265	1.03447
cgp_2978	0.996891	1.00499	1.02462	1.02928	1.02939	1.02385	1.04739	1.02117	1.01298	1.01153	0.994959	0.935809	1.00919	1.05575	1.01806	1.0189	1.03225	1.06327	1.06063	1.01343	1.02259	1.00732	1.00787	1.04968	0.986503	1.0028	0.990075	0.98575	0.9891	0.993816	0.999216	0.92253	0.986109	0.973135	1.02153	1.01508	0.993164	1.01196	1.00926	1.02961
cgp_0549	1.0074	1.08479	1.01179	1.05491	1.03064	1.01674	1.05327	1.00111	1.03909	1.03754	1.05425	0.95431	1.01303	1.04255	1.03195	1.00143	1.04194	1.02013	1.03204	1.02691	0.994375	0.994948	1.04107	1.00042	1.00935	1.00913	1.04438	0.965485	1.01351	1.04377	0.99269	0.981408	1.03491	0.977294	1.02675	1.04233	1.04466	1.02954	1.05773	1.01055
cgp_1293	0.974808	0.967395	1.02434	1.01493	1.07021	1.00445	1.0217	1.06664	0.997195	1.04052	1.00179	0.953513	0.928847	0.970251	1.07582	1.02357	0.972819	0.984423	1.02873	0.975888	1.02427	0.986618	1.07754	1.01559	1.02895	1.05578	0.978292	1.02222	1.02045	1.07622	0.990307	1.00734	1.00908	0.973995	1.0149	1.04129	1.03165	0.989752	0.996242	0.990396
cgp_3320	0.982335	1.01302	1.02991	1.0404	1.07712	1.04274	1.04736	1.0522	1.03505	1.08226	1.05012	1.05346	1.04452	1.03056	1.01517	1.02981	1.05351	0.911998	0.962834	1.01299	1.0074	1.01608	0.952435	0.964564	1.01594	1.03179	1.03181	1.03136	1.02612	1.02637	1.0146	1.0124	1.0383	1.03523	1.01224	1.01382	1.03142	1.03967	1.03455	1.04117
cgp_3321	1.02617	1.02999	1.02172	1.0171	1.07715	1.01587	1.03719	1.04461	1.03903	1.10104	1.04839	0.971916	1.03998	1.00068	1.02134	1.05406	1.04674	0.909091	0.972994	1.05298	1.02711	0.982542	0.977274	0.982451	1.05119	0.990672	1.01536	1.03553	1.00182	1.03639	1.00853	1.01495	1.01502	1.04387	1.02748	1.0165	1.00643	1.04833	1.03863	1.03303
cgp_1247	1.03781	0.975207	1.02537	1.00585	1.05689	1.00511	1.05678	0.974301	1.05755	1.04567	1.05747	0.962699	1.04682	1.00274	1.01488	1.04203	0.997538	0.969372	0.952123	1.03421	1.00162	0.978885	0.964536	0.894798	1.06936	1.04549	1.03571	0.983285	1.0091	1.02538	1.01966	1.02207	1.02015	1.0453	1.02659	1.04937	0.973032	1.01482	0.988156	1.02858
cgp_2809	0.950639	0.992426	1.02368	1.00539	0.988744	1.01894	1.02575	0.99898	0.978343	0.996748	1.02934	0.995369	0.968123	0.950046	0.987909	1.01038	1.03595	1.00756	1.0363	1.03829	1.01776	0.983248	0.965105	0.994702	1.07539	1.01382	1.01779	1.00316	1.01614	1.05476	1.0055	0.993674	0.988319	1.033	0.980695	1.04313	0.968631	1.02504	0.998429	0.979848
cgp_0906	0.950591	0.951337	0.99845	1.00649	0.97773	0.98877	1.02204	1.00825	1.01165	1.01433	1.07193	0.991104	1.01641	0.919729	0.982838	1.0216	1.04745	0.997778	0.974493	1.03096	1.00137	0.983757	0.946696	0.968776	0.960484	1.02217	1.01043	1.02152	1.05307	1.00136	0.99661	0.973503	0.991568	0.995147	0.984749	1.00876	0.996122	1.01553	1.01707	0.971446
cgp_1831	0.952214	1.00075	1.0374	1.04184	1.01949	1.05181	1.05566	1.04424	1.01251	1.03208	1.05261	1.02004	1.08206	0.95307	1.02602	1.03995	1.08004	0.983486	0.990354	1.00273	1.02624	0.97622	0.995488	0.982228	1.02467	0.995216	1.04022	1.01375	1.07346	1.06768	1.0494	1.05947	1.02153	0.999453	1.03974	1.02051	1.02757	1.04245	0.981067	0.956807
cgp_1179	1.01857	1.00799	1.01954	1.01785	1.0157	1.04125	1.03472	1.03271	1.01117	1.01497	1.01312	0.979784	1.0083	1.01879	1.01634	1.02003	1.02775	1.02098	1.01652	1.00584	1.01438	0.999697	1.01685	1.00873	1.02136	1.01695	1.01936	1.01393	1.01396	1.03033	1.02902	1.01639	0.999063	1.0141	1.02772	1.01468	1.02676	1.00423	1.01751	1.00955
cgp_1100	1.02782	1.00228	1.01003	1.0123	1.0145	1.02512	1.02646	1.02286	1.00017	1.00924	1.02748	0.982819	1.00999	1.01764	1.02419	1.01817	1.01767	1.01508	1.02082	1.03937	1.01799	1.00801	1.00431	1.00578	1.00662	1.00062	1.02544	1.0251	1.01839	1.01326	1.02465	1.01529	1.00343	1.0215	1.01119	1.01835	0.992811	1.0081	1.00931	1.01187
cgp_1309	1.02845	0.983311	1.02801	1.01797	1.01761	1.04117	1.02034	1.03392	1.01384	1.01958	1.02352	0.992011	1.01422	1.00246	1.03281	0.999598	1.02432	1.01922	1.0222	1.0166	1.00515	0.990706	1.00306	0.98515	1.02176	0.997644	1.02557	1.01934	0.998219	1.01336	1.02466	1.01049	1.0173	0.999983	1.03586	1.04532	0.999366	1.02118	1.01665	1.00577
cgp_1349	1.00854	1.03545	1.02094	1.02666	1.0092	1.02298	1.0327	1.0584	1.01336	1.00899	1.02124	0.963563	1.00494	1.00739	1.03246	1.0158	1.0386	1.01747	1.00501	1.02386	1.00114	0.989859	0.987665	0.998117	1.01648	1.03349	1.01884	1.01545	1.02532	1.02503	1.01815	1.03086	1.01131	1.02066	1.03118	1.0068	1.02027	0.996764	1.01613	1.00999
cgp_2290	1.01896	1.03524	1.02806	1.01617	1.00809	1.02824	1.03893	1.03243	0.985631	1.01131	1.0033	0.994673	1.0145	0.988546	1.02408	1.00965	1.02594	1.00675	1.01607	1.03361	1.00593	1.00756	1.00168	1.00139	1.00854	1.00707	1.01545	1.00417	1.03882	1.01649	0.999681	1.01346	1.01021	1.013	1.002	1.03075	0.9752	1.00268	1.01877	1.02796
seuC	0.990622	1.01416	1.00778	1.02841	1.02128	1.01415	1.0093	1.03323	1.02195	0.972816	1.00167	1.00079	1.01642	0.995039	1.01029	1.01094	0.988463	1.00497	1.01427	1.02482	1.01319	0.990687	1.02498	0.974408	1.02211	1.01388	0.998518	1.00633	1.00159	1.00827	1.01326	1.00085	1.01125	0.99069	1.01434	1.02818	1.0091	0.988839	0.995093	0.997349
sucD	1.0152	1.03241	1.01154	1.01113	1.01539	1.03028	0.993515	1.01707	0.998092	0.988092	0.995202	0.963635	1.01907	1.0032	1.00526	1.01303	1.01658	0.996024	1.0043	1.00627	1.00885	0.977395	1.00061	0.970945	1.0048	1.00484	1.00282	0.984673	0.988993	1.01733	0.999812	1.02083	1.03394	0.994569	1.01451	1.03289	1.00338	1.00389	1.00443	1.00883
cgp_0825	0.993422	1.01203	1.0129	1.01037	1.01089	1.03724	1.01048	1.02515	1.01203	0.987265	0.996273	0.976376	1.02952	0.971702	1.01055	1.04161	1.02227	0.999835	1.01459	1.00519	1.01141	1.00004	1.00367	1.0142	1.00037	1.0071	0.971712	1.01783	1.00154	1.03493	1.01732	1.00848	1.02307	0.992604	1.02102	1.02937	1.00961	1.00337	0.981796	0.998904
cgp_2243	0.990824	0.988538	1.03686	1.03062	1.01789	1.02492	1.02118	1.00927	1.0057	1.01452	0.993468	0.978536	1.03082	0.992044	1.02533	1.01121	1.02546	0.993004	1.00877	1.01686	1.0153	0.994339	0.991897	0.989937	1.03092	1.00747	1.01593	0.979109	1.01811	1.02837	1.0208	1.01879	1.01352	1.00323	1.02272	1.00789	1.00665	1.02077	0.994218	0.988422
cgp_2135	1.00137	1.00799	1.02974	1.04171	1.00478	1.0295	1.04904	1.0225	1.0046	0.996799	0.978943	0.986193	1.00564	0.974718	1.01214	1.0213	1.02571	0.99786	1.00105	1.00051	1.01767	0.97411	0.978896	0.992704	1.024	1.0123	1.00328	1.00737	1.0128	1.02161	1.01898	0.997816	1.00775	1.02153	1.0174	1.03596	1.00563	0.993991	1.00138	0.987208
recN	1.00773	1.01672	1.01257	1.0347	1.00963	1.01367	1.02839	1.00796	1.00482	0.974916	1.018	1.00434	1.02305	1.03028	1.01459	1.03847	1.01102	0.99323	1.01624	1.03661	1.03566	1.00578	1.00157	0.980407	0.992013	1.0252	1.03966	1.02769	1.00594	1.00597	1.04591	1.02691	1.01918	1.01753	1.01009	1.04764	1.00796	1.00691	0.998401	1.00006
moaA	0.977973	1.00697	1.01315	1.00963	0.997828	1.00417	1.0378	1.0154	1.02887	0.981145	0.981826	0.972106	1.03582	1.00096	1.03371	1.04667	0.993991	1.0018	1.01931	1.00258	1.01127	0.994078	1.01326	0.987091	1.00875	1.02107	1.02828	1.04664	1.03235	0.990407	1.0268	1.02703	1.02531	1.01566	1.01134	1.01192	1.00218	1.01935	1.00112	0.998349
cgp_2953	0.999887	1.01532	1.03918	1.02026	1.01404	1.02011	1.03167	1.02795	1.02889	1.02133	1.03256	0.984156	1.01129	1.04029	1.01993	1.03704	1.01043	1.02742	1.02424	1.0245	1.00517	0.979315	1.02768	1.02468	1.02505	1.01196	1.01069	1.02757	1.02212	1.02419	1.01787	1.04723	1.01477	1.01606	1.04	1.04127	0.992862	1.01612	1.02837	1.02728
prpD1	1.01429	1.03382	1.02357	1.02823	1.02135	1.02761	1.01184	1.02505	1.02281	0.995276	1.02287	0.997614	0.987691	1.02084	1.00261	1.00828	1.01695	1.01568	1.00652	1.03326	1.01967	0.989128	1.04252	1.02222	1.01341	1.02616	1.00925	1.00193	1.02059	1.01338	1.01789	1.02651	1.02441	1.03431	1.03531	1.03437	1.00854	1.00676	1.0253	1.02182
tagA1	0.972463	0.985973	1.03684	1.02553	1.01905	1.03994	1.03132	1.03838	1.02182	1.03127	1.02236	0.969483	0.983692	1.01264	1.01471	1.04047	1.01391	1.01022	1.01612	1.03926	1.03908	0.998439	1.0186	1.01772	1.01406	1.03276	1.00509	1.00557	1.00808	1.01942	1.0218	1.03627	1.01205	1.0237	1.0299	1.035	1.02064	1.01972	1.02093	1.03351
cgp_0993	0.989167	1.00418	1.04962	1.02169	1.03826	1.01857	1.03111	1.0074	1.01095	1.00196	1.02174	0.947361	1.01934	1.02289	1.03402	1.01362	1.02887	1.0208	1.00418	1.02906	1.05012	0.982129	1.04747	1.02194	1.02312	0.994698	1.01182	1.01421	1.01711	1.05536	1.02638	1.04027	1.01317	1.0317	1.0158	0.998606	1.01938	1.00707	1.01121	0.983556
cgp_1452	1.01469	1.01434	1.02062	1.01809	1.0134	1.01528	1.06021	1.02057	1.01762	0.992527	1.02846	0.973775	1.00804	1.02324	1.0155	1.0381	1.02168	1.00786	1.00561	1.01647	1.03141	0.993917	1.04651	1.00405	0.997667	1.04676	0.993617	1.04143	1.02106	1.02878	1.02881	0.981205	1.02059	1.02805	0.998834	1.02595	1.03396	1.00918	1.04063	0.99074
cgp_1322	0.984163	0.993917	1.05431	1.01687	0.988788	1.02564	1.0398	0.998482	1.00025	0.997911	1.03012	0.969599	1.0068	1.0184	1.03509	1.01703	1.01529	0.996676	1.00688	1.01175	1.03412	1.01045	1.02872	0.98752	1.00969	1.02335	0.987098	1.01523	1.05276	1.04849	1.00485	1.01321	1.02711	1.02254	0.976036	1.00323	1.03464	0.996212	1.01335	0.999255
cgp_1465	0.996913	1.02954	1.01884	1.04267	1.02514	1.02784	1.03061	1.037	1.04069	1.02198	0.995844	1.00061	1.02826	1.03932	1.0162	1.04536	1.01871	0.997675	1.01675	1.0292	0.9976	0.989495	1.01716	0.99752	1.01151	1.02558	1.02054	1.01923	1.03375	1.03385	1.02685	1.03062	1.00737	1.00203	1.01772	1.03779	1.05357	0.998196	1.02789	0.993763
cgp_3343	0.989096	1.03259	1.03821	1.04681	1.02131	1.01638	1.02614	1.03166	1.02184	1.03107	1.00449	0.995279	1.01974	0.995811	1.01872	1.0246	1.02328	1.02369	1.03194	0.998768	1.00846	1.01599	1.01938	1.03016	1.02521	1.01982	1.01448	1.02785	1.01922	1.02235	1.02708	1.03188	0.996342	0.988931	1.014	1.04164	1.04394	1.00172	1.02864	1.0279
hisC	1.00515	1.00938	1.0371	1.02269	1.01189	1.02344	1.0497	1.02758	1.01332	0.994198	0.997613	1.01029	1.02873	1.03817	1.0167	1.02922	1.03845	1.03607	1.01719	0.982424	1.02838	1.029	1.03753	0.991513	1.02914	1.03593	1.00491	1.00486	1.02138	1.01684	1.02106	1.01945	1.04111	1.01271	1.02022	1.03811	1.03228	1.01566	1.01205	0.999381
cgp_2889	1.01677	1.01121	1.02937	1.01231	1.02015	1.04412	1.02457	1.05444	1.00394	0.988127	1.00427	0.996363	1.00564	1.03857	0.992789	1.03056	1.02305	1.02785	1.02138	0.985482	1.00829	1.0071	1.02248	1.01395	1.01928	1.01422	0.99209	1.00539	1.03915	1.02645	1.02864	1.0161	1.02965	0.995062	1.03775	1.03487	1.03242	0.999147	0.999615	1.0222
cgp_0958	0.982773	0.987588	1.0271	1.01594	1.00762	1.02317	1.0425	1.03138	0.99948	0.975188	1.04087	0.981423	1.0064	1.03077	1.00669	1.03975	1.01956	1.00912	1.02446	1.00339	1.02686	1.00816	1.04115	0.982597	1.02824	0.98299	1.02474	1.00826	1.03207	1.02009	1.0086	1.03108	0.993372	0.997422	1.01672	1.0285	1.0548	1.01104	1.0023	1.01794
cgp_3249	1.00538	1.03906	1.00435	1.01466	1.0305	0.989242	0.99928	1.00616	1.02725	0.985804	1.02108	0.968393	1.02528	1.00627	1.00792	1.02204	1.03466	1.02708	1.01071	0.978974	1.01967	1.028	1.03846	1.01483	1.05397	1.02308	1.0094	1.01023	1.01997	0.997516	1.02294	1.01162	1.02596	1.00896	1.01149	1.03541	1.03973	1.04359	0.999883	1.02114
cgp_3199	1.00255	1.0341	0.994079	1.00831	1.01151	1.00909	0.965985	1.02539	0.999364	0.976441	1.00155	0.966844	1.01693	1.00872	0.994148	1.02414	1.01519	1.00457	1.01647	0.992221	1.01199	1.03207	1.02629	1.03727	0.996111	0.982462	1.02495	1.02124	1.00694	1.04026	1.01527	1.03542	1.01454	1.01672	1.01491	1.01944	1.03899	1.02617	1.02655	1.01521
cgp_0175	1.01574	1.02782	1.01628	1.03202	1.03846	1.01468	1.01272	1.01043	0.997449	0.956912	1.03251	0.975483	0.981064	0.997361	1.00789	1.01885	1.02172	1.00505	1.02215	1.01908	1.02533	1.02621	1.01183	1.01432	1.0773	1.0096	1.03317	1.01246	1.01903	1.03432	1.02886	1.04567	1.01223	0.99419	0.997815	1.00008	1.01906	1.01006	1.02458	1.00775
cgp_1176	1.05786	1.02722	1.03052	1.01399	1.00905	1.01922	0.978161	1.0085	0.993638	1.00899	1.00602	0.993561	0.996284	1.00869	1.00169	1.0297	1.03486	0.98195	1.01372	0.998787	1.00393	0.997044	1.02991	0.996797	1.04389	1.01749	0.984181	1.02158	1.02018	1.0448	1.01007	1.00084	1.01483	1.0356	1.00694	1.00644	0.992861	1.01829	1.00574	1.01027
dapD2	1.00851	1.01435	1.03635	0.991473	0.992966	1.0249	1.00563	1.01922	0.985252	1.00351	0.996681	0.973513	1.01468	1.0194	1.01033	1.00505	1.00583	1.02484	1.01142	1.00813	1.01763	0.988002	1.01417	0.981399	1.05037	0.998373	1.00927	1.0098	1.01414	1.01975	1.01412	0.992087	1.01189	1.01965	0.990678	0.999199	1.02834	1.01832	1.0033	1.02875
cgp_2417	1.00568	0.988643	1.01186	1.01897	0.999704	1.03978	1.02515	1.02889	0.998524	0.972112	0.992535	1.01779	1.00541	1.01857	1.03282	1.01494	0.997557	1.02322	1.02321	1.0371	1.03215	1.04014	1.01809	0.995968	0.99346	0.99164	1.02266	1.01796	1.00677	1.01435	1.03235	1.02538	1.00936	0.990904	1.03172	1.03718	1.04517	1.02457	1.02318	1.00765
cgp_2517	0.997581	1.01006	1.01287	1.00397	1.00945	1.02267	1.02059	1.02184	1.02427	0.987678	0.99622	1.0123	0.998021	1.01207	1.03097	1.02238	0.998218	1.01364	1.00637	1.01498	1.0177	1.01185	1.0111	1.02308	1.00222	1.03175	1.00208	0.975745	1.01939	0.997216	1.04166	1.03162	1.00661	1.00166	1.03249	1.05134	1.05817	1.01365	1.01251	1.00697
cysZ	1.01029	1.02283	1.01957	1.00714	1.01504	1.02067	0.999944	1.00738	1.01801	1.01197	1.02308	1.0122	0.991513	1.00183	1.02005	1.04497	1.00663	1.01504	1.02342	1.03568	1.04042	1.06281	1.01642	1.02019	1.01458	1.01398	1.01614	1.03377	1.03028	0.997356	1.03466	1.04469	1.00297	0.998	1.01863	1.05159	1.01682	1.02401	1.031	1.02816
cgp_1104	1.02403	1.00001	1.02395	1.01803	1.02049	1.03087	1.01989	1.01554	1.01554	0.995319	1.03964	1.00718	1.03268	1.03134	1.03493	1.02011	1.00323	1.05417	1.04425	1.00265	1.03219	1.06146	1.03392	1.01934	1.02711	1.00533	1.00417	1.01721	1.00473	1.00802	1.06206	1.06504	1.02415	1.01808	1.03208	1.03772	1.04907	1.01289	1.0067	1.01493
groEL'	1.00608	0.99982	1.01248	1.02217	0.991754	1.01873	1.02002	1.01057	1.01878	0.963393	1.09017	0.964833	0.978034	1.02537	1.01803	1.00974	1.00005	1.01193	1.04125	1.02544	1.03362	1.01687	1.03383	1.02785	1.02039	1.02876	1.01522	1.00416	0.986733	1.005	1.02092	1.03179	1.01952	0.974706	1.03367	1.07655	1.01443	1.01842	1.01291	1.00516
cgp_2480	0.97987	1.03709	1.0073	0.99824	1.01355	1.01509	1.01943	1.01588	1.02477	0.995013	1.0142	0.987689	1.01644	1.03825	1.03333	1.03602	1.0203	1.03276	1.04086	1.02364	0.992109	0.992925	0.994991	1.01644	1.00221	1.01511	1.02352	1.0085	1.03337	1.01631	1.01725	1.04172	0.990901	1.02891	1.06189	1.02639	1.01826	1.01482	1.01563	1.01963
rbsR	0.988745	1.00008	1.01802	0.993127	1.00574	1.02711	0.98618	1.02094	1.02302	0.985481	1.01997	0.987182	1.02905	1.03767	0.997646	1.01914	1.02147	1.02001	1.01428	1.02774	1.01211	0.989773	0.973314	1.01323	0.979521	1.02941	1.02233	0.982422	1.01186	1.01579	1.01954	1.04864	1.01765	1.02985	1.04408	1.04266	1.05281	0.991983	1.00443	0.995263
cgp_2200	1.00652	1.01843	1.00017	0.996059	0.984108	1.02673	1.06989	1.02689	0.995134	0.98695	1.04497	0.979148	1.00522	1.05146	1.04058	1.00193	1.01571	1.0164	1.02513	1.04611	1.0204	1.00218	1.01306	1.01474	0.983259	1.01819	0.995255	0.979557	1.03134	1.02961	1.02159	1.0528	1.0369	1.02629	1.03592	1.05177	1.04987	1.01588	1.02469	1.01624
cgp_3214	1.03267	1.0166	1.00496	1.00265	1.01434	1.02837	1.03456	1.0146	1.01368	0.967472	1.04679	1.02075	1.00878	1.07795	1.00274	0.96251	0.990357	1.01663	1.01291	0.997636	1.00966	1.00831	1.02198	1.01956	0.99321	1.02963	1.01458	1.01551	1.02546	1.01576	1.03637	1.04324	1.01263	1.01249	1.01295	1.01959	1.03193	1.02137	1.00317	1.02221
cgp_1237	1.00556	1.0403	1.01706	0.994543	1.00056	1.02901	1.03031	1.02525	0.970523	0.954067	1.00831	1.00836	0.96915	1.05203	1.01149	0.99108	1.00312	1.01192	1.02711	1.03265	0.991833	0.985789	1.00709	1.00209	0.998901	0.997169	1.01461	1.02476	1.00466	1.01808	1.02972	1.02708	0.989708	1.00516	1.00648	0.989575	1.01583	1.01359	0.998311	1.00295
cgp_1459	1.03696	1.00216	1.02256	1.02687	1.0309	1.0263	1.01634	1.02163	1.01536	0.946076	1.0179	0.986973	1.02933	1.04458	1.01955	0.971898	1.02151	1.0383	1.01529	1.05993	1.00422	1.02257	1.00115	0.999197	1.02384	1.01613	1.00577	1.01236	1.0024	1.02785	1.02784	1.01078	1.00958	1.03389	1.0332	1.03676	1.02897	1.01521	0.99214	0.994875
cgp_0867	1.02863	1.03471	0.999798	0.997823	1.02262	1.02092	1.0082	1.02569	1.02074	0.996148	1.02135	1.02721	0.99105	1.07098	0.997313	1.02986	1.00962	1.03372	1.04415	1.02534	0.988516	0.995461	1.02795	1.00133	1.00888	0.994736	1.01226	1.01148	1.00303	1.02103	1.00463	1.00603	1.01396	0.993515	0.958856	1.00788	1.0367	1.01843	1.00491	1.00863
cgp_2755	1.01784	0.998963	0.977543	0.988571	1.04002	1.02161	1.03632	1.04331	1.00886	1.01542	1.0256	0.998344	1.00567	1.05867	1.00169	1.00789	1.01802	1.01044	1.02147	1.04127	1.04556	1.03368	1.00879	1.03072	1.01599	0.99061	0.98877	1.02922	0.983345	1.02288	1.00346	1.0153	0.983645	0.988866	0.997327	0.984751	1.0409	1.00151	1.01324	1.00452
cgp_1700	1.02126	1.01705	1.02655	0.977609	1.02007	1.03969	0.998325	1.04026	1.03411	1.03344	1.0366	0.97165	0.976893	1.03683	1.05726	1.03794	1.05028	0.979953	1.01706	1.05642	1.01889	0.976321	0.970557	1.02376	0.990143	1.02103	1.05473	1.07016	1.00261	1.01991	1.04154	1.06327	1.01312	1.03679	1.0204	1.01743	1.03935	1.0114	1.01605	1.02367
cgp_2315	1.03429	1.02466	1.02079	0.967036	1.0215	1.03954	0.975978	1.03333	1.02406	1.00202	0.984302	0.934806	1.01822	1.00734	1.01948	1.01074	1.02525	0.985126	1.00995	1.02261	1.01196	0.974991	0.999215	0.997078	0.940559	1.01822	1.00986	1.01705	1.0435	0.975496	1.03574	1.03466	1.02103	1.025	1.00388	1.0373	1.02455	1.0134	1.03143	1.01473
cgp_2110	1.00916	1.01455	1.03724	1.03709	1.03488	1.01364	1.03217	1.05384	1.0295	1.0183	1.01274	1.02605	1.0315	1.06024	1.0202	1.04888	1.03196	0.953839	0.924418	1.05314	1.03698	1.02414	1.0312	1.03496	1.04127	1.00396	1.03022	1.0031	1.01825	1.05481	1.0369	1.01395	1.03903	1.03596	1.00893	1.04493	1.04	1.02366	1.01803	1.0002
cgp_2444	1.01863	1.05714	1.01317	1.03185	1.02771	1.01678	1.02691	1.0294	1.01387	1.01761	1.07956	0.927302	1.02893	1.02999	0.98081	1.00338	1.00992	0.967236	0.952672	1.05469	1.04239	0.972269	1.0498	1.02035	1.05558	1.02206	1.03195	1.01739	1.02583	1.02171	1.04429	1.01843	1.0156	1.0427	1.04146	1.0504	1.02163	1.01263	1.02083	1.01823
cgp_3282	1.00039	1.05558	1.03716	1.00576	1.05349	0.975823	0.980927	1.01539	1.00413	1.01545	1.00566	0.963744	1.04373	1.04447	1.05224	0.987418	0.991738	0.957542	0.960292	0.995171	1.05639	0.981273	1.00931	1.01754	1.04293	1.02481	0.989076	1.02531	0.991068	0.971418	1.01596	1.02995	1.01586	1.02268	0.97099	1.05911	1.00341	1.01836	1.00452	1.02948
cgp_3142	1.01299	1.02863	1.00461	0.998894	1.0106	1.00851	0.999542	0.998843	1.0152	1.00202	1.03414	0.974007	0.989542	0.996337	1.00427	1.00138	1.03545	0.937034	0.909018	0.998436	1.03927	1.03277	1.04813	1.0484	1.03203	1.03175	0.998105	1.0088	1.01962	0.994128	1.00146	1.0224	0.966126	0.997376	1.00174	1.03611	1.05232	1.02545	1.03185	1.02952
cgp_2266	1.1025	1.03051	0.992369	0.964993	0.996539	1.04045	0.980794	1.04166	1.01975	1.00907	1.02737	1.02257	1.03354	1.07123	1.04408	1.03617	1.06572	0.977295	0.963338	0.996158	1.07876	0.995968	1.04861	0.960951	1.06049	1.00114	1.02105	1.03913	1.05491	1.01076	1.01291	1.02509	0.951255	0.960667	1.05726	1.04575	1.05338	0.985614	1.0059	0.953812
udgA1	0.989407	1.06346	1.05014	1.04682	1.03812	1.07143	1.05515	1.0664	1.0354	1.05926	0.989863	0.983102	1.04353	1.00533	1.03813	1.05675	1.10211	0.996556	1.00816	1.02277	1.00351	0.998136	1.04415	1.02351	1.04097	1.02746	1.02551	1.05167	1.06231	1.03774	1.04284	1.05509	1.02772	1.02491	1.04736	1.05584	1.0536	1.02894	1.0251	1.04787
gpt	1.0344	1.03603	1.03446	1.05823	1.05743	1.0214	1.06272	1.04729	1.01446	1.04345	0.947356	1.04621	1.01316	1.04858	1.03989	1.0285	1.07569	0.999812	1.01114	1.01688	1.02906	0.992177	1.00621	1.01928	1.05247	1.0324	1.04716	1.06583	1.04007	1.04015	1.04369	1.01728	0.982009	1.0215	1.05114	1.04989	1.04585	0.992973	1.03316	1.02744
cgp_2332	1.03385	0.991448	1.05688	1.06692	1.01799	1.05911	1.04378	1.05554	1.02676	1.002	0.931252	0.951237	1.03306	1.05027	1.02917	1.05623	1.03959	0.984113	0.996915	1.03553	0.974971	1.02116	1.0167	1.03379	1.03559	1.027	1.05107	1.04243	1.03461	1.02713	1.05425	1.02934	0.999689	1.02473	1.01785	1.03428	1.05517	1.04592	1.03411	1.01178
cgp_1443	1.06319	1.04266	1.01519	1.0204	1.05851	1.08515	1.0601	1.05861	1.01098	1.03396	0.979651	0.9962	1.05656	0.988727	1.07423	1.02592	1.06334	0.945278	0.965465	1.01151	1.01645	0.954526	1.00943	1.02144	0.995838	0.99385	1.03203	1.00602	1.02105	1.06928	0.985049	1.06125	0.969073	1.06211	1.08019	1.08278	1.03315	1.02255	1.03826	1.05548
cgp_1328	1.12642	1.07575	0.997864	1.03975	1.03636	1.06888	1.0465	1.05189	1.0206	1.04335	1.01462	0.982621	1.02089	1.01555	0.994048	1.04314	0.97931	1.00216	1.01147	0.99075	0.953106	0.966328	1.06613	0.962911	1.00542	1.01279	0.984743	1.06929	1.10284	1.00581	0.980236	1.02464	1.02474	1.00881	1.00923	1.02118	1.01574	1.00522	1.03545	1.06435
cgp_1183	1.05177	1.02923	1.02001	0.979072	1.00084	0.94506	1.03903	0.940062	1.01086	1.02371	1.03771	0.91464	1.02717	1.06361	1.0579	1.01744	1.00045	1.01841	0.995895	1.0691	1.01102	0.994628	1.05312	1.01606	1.08451	0.959453	1.01713	0.910383	1.03682	1.03257	1.03715	1.02378	1.00129	1.05837	1.09038	1.03283	1.06524	1.06391	1.04304	1.01229
gntV	0.991316	0.985499	1.07149	0.968478	0.978521	1.0055	1.03806	0.96892	1.00571	1.01105	1.00863	0.867883	0.942572	1.00499	1.02814	0.97743	1.00251	1.0424	1.03146	1.08817	1.03377	0.989725	0.987238	0.998614	0.991852	0.990124	1.02524	1.0284	1.03887	1.04883	1.0057	1.02938	1.00947	0.985984	1.01365	1.03436	0.999055	1.03487	0.997495	1.00483
uspA1	1.0186	1.08145	0.998917	1.00111	1.02093	0.997903	1.02083	1.04316	0.985674	1.03584	1.0528	0.920279	1.05042	0.993899	1.08286	1.0341	1.00526	0.961569	1.01067	0.903352	0.991169	1.07972	0.978785	0.983363	1.04868	1.01724	1.02899	1.05428	1.00363	1.03919	1.05223	1.07143	0.983571	1.01374	1.0421	1.04989	0.960742	1.07566	0.99597	1.00753
cgp_0528	1.05507	1.06724	0.967946	1.01426	0.978157	0.975606	1.00646	1.0117	1.04644	0.983041	1.06769	0.913945	1.00546	1.05117	1.03231	0.997602	1.01412	1.02453	0.995491	0.942565	1.04152	1.0872	0.985151	1.001	0.995733	0.937914	1.01428	0.986393	0.984451	1.02283	0.969983	1.00273	0.994184	0.995852	1.06591	0.977909	1.02192	1.04117	1.02313	1.01846
cgp_3124	1.02409	1.03906	1.07155	1.03497	1.0779	1.06047	1.0511	0.97196	1.07025	1.04029	1.04026	0.896369	0.936421	1.06016	1.02481	0.937882	1.02295	0.93728	1.0278	0.971281	1.05022	0.98379	1.01941	1.03251	0.930944	1.00031	1.05553	1.01363	1.02253	1.03198	1.02639	1.04149	1.03683	0.964964	1.05123	1.10426	1.06571	1.05803	1.00523	1.05094
cgp_0740	1.01775	0.996748	1.01071	0.996014	1.00991	1.00091	0.988887	1.00577	1.02119	0.975376	0.958004	0.996786	1.03754	0.993996	0.987629	1.00974	1.01744	0.960065	0.953896	1.01558	0.997684	0.989623	1.00729	1.01045	1.01215	1.00262	0.993648	0.988482	0.985154	0.996563	0.940567	0.874734	1.00508	1.00178	1.00765	0.975017	1.00418	1.00722	0.987074	1.00852
cgp_0739	1.0259	1.00967	0.9757	1.00653	1.01479	0.992278	1.01162	0.988968	1.02797	0.97704	0.972449	0.99612	1.00688	0.996535	0.957399	1.01621	0.986877	0.943877	0.963381	1.04832	1.02196	0.993383	1.00491	1.01286	1.00064	1.01184	0.973708	0.966976	0.983141	1.00081	0.942218	0.852249	0.984919	0.968928	1.01165	0.977169	0.959428	1.00726	0.987154	1.01076
cgp_1015	1.0016	1.01788	0.997876	0.977825	0.987469	1.02713	0.995622	1.02946	1.02452	1.04766	0.980149	0.966526	0.97484	1.02213	0.995467	0.991649	1.02533	0.979527	0.951042	0.983473	0.99156	0.982022	0.991958	1.00125	0.970503	1.02308	0.993192	0.980112	1.00104	0.998183	0.936608	0.917301	1.02935	0.972475	0.996532	1.01249	1.01516	0.997078	1.0062	1.00303
cgp_3133	0.984907	0.997665	0.964431	0.978606	1.01609	1.02562	0.977315	1.01271	1.02002	0.999902	0.999038	0.989045	0.963049	0.989416	0.968579	0.991101	1.02639	0.982285	0.969548	0.951733	0.984243	0.974985	0.997116	0.999714	0.977617	0.989207	0.980302	0.988679	0.992455	0.969263	0.971837	0.939344	0.97378	0.986076	1.00432	0.992565	0.980161	0.982487	0.9974	0.997223
cgp_1103	1.0256	1.00882	1.01093	1.00648	0.995908	1.00393	1.01259	0.99814	0.997038	0.991468	0.957617	1.02295	0.95456	1.00269	1.01267	0.984144	0.985464	0.936126	0.972567	0.997217	0.960217	0.886384	0.999549	0.991888	1.00804	0.999463	1.00357	0.990377	0.999256	1.00553	0.952119	0.939481	1.00957	1.00857	1.00655	0.972215	0.996702	1.00528	1.00714	0.999613
fdxB	0.991057	0.976025	0.986352	0.985484	0.988722	0.97172	1.0295	0.981963	0.978877	0.985021	0.932442	1.03592	0.948067	1.01097	0.990679	0.995615	1.00671	0.968994	0.986886	1.00943	0.958969	0.962804	0.992728	0.98576	0.998904	1.00617	0.963686	0.980096	0.986531	0.985507	0.964136	0.958296	1.00711	0.981692	0.980134	0.978181	0.980123	0.974054	1.00003	0.995977
cgp_0534	0.990113	1.01581	0.981446	0.998282	1.02988	1.00453	1.05166	1.00983	1.01414	0.979913	0.997122	1.03989	1.00434	0.968629	0.97635	0.994075	0.995791	0.970916	1.00126	1.00435	0.962985	0.985471	1.02221	1.01568	1.03382	0.982879	0.997097	0.993402	1.01612	1.00759	0.968131	0.948625	0.99475	0.992569	1.00679	0.955275	1.00266	0.98183	0.986344	0.9934
cgp_0944	1.01823	1.00125	0.990789	0.970767	1.01151	0.997013	1.0053	1.00461	0.99073	0.959476	1.00984	1.01006	1.04641	0.954138	1.00855	1.007	0.981368	0.956494	0.977372	1.01038	1.00913	0.990008	1.01469	0.962632	1.00687	1.01261	1.00774	1.00583	0.993667	1.00269	1.02809	1.05194	1.01218	1.01136	1.01368	1.04219	0.998357	0.986245	0.992597	1.00007
tusF	1.02415	1.02808	1.01732	0.987245	1.00437	1.00009	0.997129	0.978451	0.989732	0.994336	1.0216	1.01756	1.00242	0.964313	1.01359	0.988067	0.970419	0.969316	0.978655	1.00652	0.986714	0.990979	1.0453	0.992845	1.01937	1.01519	0.993359	1.00461	1.00005	1.01417	1.00441	1.0053	1.02589	0.997587	0.973311	0.987459	0.985732	0.988676	0.999091	0.98554
cgp_3283	1.05352	1.01119	1.01432	1.0266	1.00146	0.979856	0.988116	1.02866	1.00623	1.00185	1.03161	1.01479	1.08045	0.988586	1.03297	0.988742	0.997168	0.931604	0.952525	1.02684	1.01299	1.00774	1.04589	1.01413	0.976939	1.00482	0.998575	0.987686	1.03257	1.01712	0.977955	0.979491	1.01031	1.03744	1.03418	1.02726	0.988004	1.00457	1.009	1.00283
cgp_1098	1.0255	1.0109	0.991636	1.03257	1.03274	0.970759	1.03402	0.988426	1.0122	0.993722	0.998493	0.985867	1.03688	0.943486	1.00231	0.980066	0.986872	0.95043	0.963959	1.04058	1.01156	1.03155	1.00959	0.990609	1.03822	0.937931	1.00453	1.01813	0.96075	0.974024	0.981662	0.97319	1.01113	1.00861	1.03198	0.973442	1.00696	1.02411	0.987452	1.01934
cgp_2747	1.03901	0.985623	0.955728	1.02476	0.98472	1.0067	1.00449	1.00593	0.994082	0.971894	0.985561	0.93884	1.05837	1.00756	1.01572	1.00595	0.997028	0.996012	0.987625	1.02824	1.01314	0.964786	1.04213	1.02089	0.991636	0.988239	1.00134	0.97677	0.997627	0.93046	0.979969	1.01564	0.95547	1.02212	1.01823	0.972593	0.975064	1.02105	1.00799	0.974322
cgp_2730	1.0424	1.016	0.954945	0.99503	0.975831	0.964676	0.979411	1.00274	1.01423	0.960508	0.975324	0.949819	1.0205	0.972583	0.989057	1.0095	0.992525	1.00568	0.956509	1.04842	0.976627	1.0122	1.01701	0.967149	0.928858	0.947849	0.977467	1.00187	1.03107	0.985808	0.988543	0.984833	0.965661	1.01653	0.946117	1.00056	1.04029	1.01285	0.997096	0.964409
cgp_2320	1.05958	0.998788	1.05787	1.03218	1.03037	1.04812	1.02836	1.04933	1.04085	0.997733	1.00116	1.02695	1.02979	0.984244	0.989919	1.01752	1.06391	0.935444	0.943398	1.04324	1.01228	0.956044	0.990561	0.999937	1.02688	0.998797	1.0245	1.00215	1.01515	0.991731	1.01108	1.0099	1.01148	1.03219	0.946443	0.897592	1.02082	0.978328	1.00042	1.00662
serC	1.03079	1.00459	1.03223	1.01866	1.0088	1.03516	1.05968	1.03465	0.980054	1.00115	0.974914	0.987721	1.01304	0.966708	1.02059	1.03815	1.01639	0.972726	0.950818	1.03272	1.01505	0.99424	1.00256	1.00798	0.999776	1.03216	1.01318	1.0149	1.01119	1.01413	1.0247	1.03799	1.02424	1.01522	0.944169	0.95358	1.02032	1.02036	0.967652	0.983543
cgp_1607	1.0227	1.02462	1.03102	0.992577	0.958677	1.0071	1.01142	1.02195	0.992675	1.01108	0.936263	1.03219	0.919896	0.956488	1.00173	0.998026	1.0174	0.935479	0.969329	1.05021	1.01869	0.973586	0.946485	0.959007	1.0673	0.961552	1.05434	0.959229	1.02036	1.02772	0.983972	1.00219	0.979007	1.00911	0.962882	0.961674	1.03295	1.00076	1.00023	0.988265
fmu	1.06402	1.03225	1.02429	1.0056	1.01291	1.02483	1.01354	1.02888	1.00811	0.995697	0.931399	1.04696	1.01138	0.919167	1.04355	1.03282	1.03753	0.964904	0.954294	1.03884	1.0216	1.00612	1.01302	1.01959	1.04178	1.02683	1.02473	1.01593	1.02375	1.02731	1.04005	1.03948	1.00554	0.981904	1.03753	1.0259	1.03568	1.03323	1.02928	1.02879
cgp_2330	1.00694	0.997301	1.02408	0.988489	1.02632	1.02702	1.03597	1.02501	1.00936	0.990188	0.910462	1.00993	1.00529	0.95139	0.994244	1.03141	0.972175	0.897073	0.916781	1.00107	1.01166	1.00239	0.968667	0.964954	0.988879	0.987538	0.995104	0.970885	1.04843	1.00461	1.02951	1.02328	1.00553	1.02817	1.00651	1.02203	1.05624	1.00134	1.0034	1.03153
glnD	1.02501	1.0179	0.999684	0.979807	0.978324	1.02546	1.00452	1.00505	0.950879	0.898512	0.954711	1.01432	0.98803	0.99603	1.03263	1.01874	0.99151	0.992085	0.999125	1.03001	1.02655	1.02315	1.02535	1.02372	1.01385	1.01652	1.01059	1.0211	1.01325	1.02066	1.00879	0.983975	1.00895	1.011	1.03365	1.01799	1.02002	0.991187	1.02007	1.01578
glnK	1.02562	1.01267	0.985078	0.967156	0.967247	1.05435	1.01751	1.02486	0.896788	0.887474	0.960697	1.03994	1.00274	0.968228	1.01487	1.0147	0.999299	0.99296	1.0092	1.0299	1.01916	1.01113	1.01222	1.02285	1.02753	1.02587	1.00881	0.995434	1.04777	1.0329	1.0205	1.00351	1.02275	1.01369	1.04866	0.959906	0.995637	1.03202	1.00718	1.00169
cgp_0650	1.00095	1.0083	0.993938	0.990007	0.93992	1.00344	1.0013	0.985465	0.920132	0.860813	0.992889	1.04149	0.979978	0.96925	1.00861	0.973421	0.975642	0.935333	0.93574	1.01526	1.01001	0.999863	1.01546	1.01461	1.03213	1.02341	0.998782	1.00512	1.00377	1.0015	1.00065	1.01143	1.02914	1.02059	0.992358	0.985962	1.0184	1.00614	0.997887	1.00401
cgp_1051	1.02829	1.0185	1.00009	0.995936	0.940255	1.02678	0.999255	1.01219	0.905838	0.847181	1.01375	1.02126	0.976266	1.02673	1.01816	1.00325	1.00904	1.0412	1.04255	1.01554	1.00573	1.00831	1.04191	1.01164	1.03565	1.01257	1.02746	1.01645	1.01749	1.01594	1.01059	0.997568	1.01869	1.01467	1.03078	0.990974	1.03808	1.03381	1.01023	1.02785
dac	1.04947	1.01396	1.00443	0.983911	0.955868	1.01198	1.01766	1.02099	0.860308	0.875866	1.02917	1.03873	1.00717	1.03809	0.994707	1.0126	1.01431	0.986887	0.972113	1.00817	0.994141	0.970034	1.04855	1.01324	1.03451	1.01959	1.01614	1.01579	1.03695	1.01718	1.00035	1.01659	1.01217	1.02771	0.994375	1.0188	1.02318	1.02967	1.03562	1.0235
brnQ	0.988523	0.99433	0.963221	0.962283	0.982426	0.99836	1.01767	1.00478	0.975655	0.921374	0.943983	1.02202	1.00661	0.948872	1.01124	0.994272	1.00476	0.994833	0.989488	0.973952	0.98738	0.961166	0.992143	0.983339	1.00544	1.0006	0.997757	1.01667	1.0037	0.992049	1.02021	0.996951	0.988512	0.99181	0.986033	1.0047	0.984533	0.998899	1.00726	0.991887
proA	0.989887	0.975057	0.992086	0.984771	0.962758	0.995744	0.989218	1.00061	0.909746	0.88064	0.949623	0.993341	1.00543	0.947498	0.993684	0.994383	0.973255	0.973521	0.991502	0.977762	0.984243	0.971702	0.990236	0.966078	0.992336	0.992583	1.0025	0.992604	0.984767	0.99117	1.00058	1.01421	0.984104	0.99151	1.00473	1.00429	0.965346	1.00062	0.996997	0.989892
cgp_2321	0.974027	1.00777	1.00644	0.98792	0.927752	1.01612	0.995056	1.01653	0.917701	0.931102	1.00728	0.980552	1.02686	0.96042	0.994845	0.992675	1.00567	1.01084	1.01795	1.00054	0.980991	0.990392	0.99662	0.980573	0.995292	0.975445	0.997513	0.999835	0.99098	1.00464	0.998337	1.00451	1.00023	1.00981	1.00064	0.996105	1.01121	0.980529	0.974721	0.994559
cstA	1.03283	0.999549	0.995637	0.953012	0.962895	0.997166	1.00723	1.013	0.952305	0.878298	0.981376	1.04028	1.05423	0.99028	1.01444	0.993097	0.983153	1.02414	1.01216	1.03725	0.97438	0.957615	1.01716	0.97829	1.00643	0.99535	0.998131	1.00507	0.989937	1.00491	0.966474	0.941454	0.998982	1.00622	1.00054	1.00654	0.99444	1.01601	1.00591	1.01102
cgp_2314	0.998361	0.991631	0.979891	0.924776	0.964892	0.984438	0.96856	1.00564	0.9483	0.885698	0.994784	1.02455	0.95902	1.00417	1.02102	0.983838	1.01203	0.989904	1.00335	1.03304	0.913901	0.985236	1.02609	1.0053	1.0073	0.962594	1.00176	0.974517	0.99542	0.993575	1.00064	1.00674	1.00109	1.00482	1.01512	1.01177	0.991098	0.991	1.01189	0.98914
cgp_2893	1.02148	0.989282	1.02048	1.01097	0.982206	1.0174	0.993039	0.969158	0.966649	0.91186	0.960069	0.988008	0.986191	1.01911	1.02643	1.02781	1.02559	1.00755	0.828359	1.01263	0.999687	0.97713	1.00796	0.997725	1.01533	1.01674	1.00071	1.03345	1.00507	1.0005	1.00349	1.01656	0.999149	0.994171	1.00732	1.00905	1.03151	1.0319	1.021	1.00353
cgp_3312	0.982461	0.993505	1.00841	1.00066	1.02919	1.00002	1.01327	1.01136	0.94794	0.88775	1.03144	0.982437	0.941662	1.07282	0.991335	1.02268	1.02333	0.960143	0.949481	1.03094	0.976916	0.942908	0.996442	0.981731	0.976833	0.99094	1.0072	0.996089	0.997716	0.991692	1.00593	1.03055	0.992001	1.00815	0.988268	0.971737	1.0079	1.01882	0.996548	1.00363
cgp_2567	1.06781	1.01138	1.07265	1.04428	0.975587	1.00615	0.984805	1.02856	1.00585	1.00532	0.880447	1.03329	1.07294	0.987029	1.00174	1.04375	0.997626	1.04935	1.05006	1.09647	1.02285	1.02449	1.0415	1.01474	1.02964	1.01766	1.02134	0.975352	1.02049	1.01203	1.00576	0.986609	1.07449	1.01228	1.03467	1.01792	1.00153	1.02488	0.988445	1.02168
cgp_4004	1.1084	1.0516	1.05744	1.00941	0.982645	0.994438	1.04821	1.02679	1.04929	0.93377	0.922125	1.05272	1.06533	0.976046	1.07735	1.03649	1.05802	1.04461	1.03846	1.01163	1.00002	0.991603	1.01409	0.956005	0.972985	0.999005	1.07771	1.04323	0.990621	1.01963	1.01421	1.03644	1.00932	1.0106	1.00964	1.03264	0.963283	1.03261	1.01983	1.00674
cgp_1263	1.02085	0.991025	1.01326	0.989372	0.989324	1.02084	1.0284	0.987282	1.02279	0.935677	0.91116	1.02223	0.9652	0.913288	1.01679	1.04745	1.01405	0.996524	0.997461	1.03894	1.01501	1.02104	1.05208	0.978723	1.02738	0.982407	1.00441	0.992921	0.997954	0.953614	1.00165	1.04239	1.01823	0.999792	1.02556	0.970835	0.948505	1.0235	1.01725	1.00204
cgp_2504	1.08561	1.05945	0.993576	1.03309	0.993164	1.01682	1.00676	0.959566	0.979239	0.968644	0.963416	1.05178	1.00465	0.963634	0.996438	0.988713	1.00341	0.993238	0.958824	1.00558	1.01578	0.995803	0.986322	1.03144	0.976642	1.00271	1.00015	1.01478	1.01607	0.993501	0.99026	1.00647	1.05025	0.999958	0.949096	0.989986	0.906871	1.01272	0.959174	0.999249
cgp_1173	0.992405	1.02792	1.03536	1.0461	1.05104	0.999145	0.979099	1.01063	1.03419	0.92787	1.01604	0.979675	1.06946	0.964851	1.02133	0.997422	0.990076	1.01315	1.01767	1.03449	0.997151	0.992186	1.00696	0.954062	0.978804	0.983062	0.99511	1.00993	1.05892	1.01595	1.01628	1.03399	1.01784	1.01809	0.990856	1.04379	1.09996	0.972357	1.00292	0.997264
cgp_4026	0.955166	1.03732	1.01123	0.997183	1.01171	0.968246	1.01014	1.01013	1.02645	0.983208	1.01436	1.01563	1.05595	0.97235	1.0152	0.989341	1.06561	1.03007	1.02237	1.04377	1.01098	0.98977	1.02568	0.957246	1.02379	0.975496	0.954529	0.961364	1.03343	0.998917	0.991674	0.981414	1.04436	1.00474	1.01864	1.04172	0.997213	0.995727	1.00537	0.986912
cgp_2380	1.04408	1.05196	1.01775	0.961713	0.992772	1.0267	0.964959	0.982475	1.01652	0.959579	0.991963	0.953415	1.07253	1.02071	0.996662	1.0067	0.989965	1.03117	1.00815	1.0567	0.993892	0.953777	1.0093	0.973678	1.00134	1.03188	1.04035	0.949101	1.0664	1.02963	0.935827	0.986907	1.00966	1.00482	1.08666	1.06399	1.02597	1.02613	1.02861	1.01784
prfC	1.01781	1.02575	1.02958	0.990313	0.98237	0.982526	0.947194	1.00012	0.989649	0.842509	1.02918	1.00808	1.03159	1.00214	1.02871	0.965111	0.926456	1.05622	1.06311	1.02259	1.02382	1.03293	0.9718	0.89725	1.01222	1.02823	1.01902	1.00872	0.994737	0.990227	0.993959	1.00213	1.01464	1.04122	1.01243	1.01589	1.02139	0.979623	0.992444	0.999136
ptsX	1.02147	1.03182	1.01935	1.01284	1.042	1.00574	1.06468	1.01918	1.02389	0.906723	0.961111	1.01127	0.996836	1.03765	1.00596	1.0494	1.02705	1.02975	1.05386	1.03021	1.06968	1.03709	1.04397	1.05434	1.0378	1.05269	1.01462	1.03753	1.02973	1.03727	1.01802	1.05749	1.05272	1.00598	1.06079	0.98871	1.07952	0.976726	1.00311	1.03505
cgp_0711	1.0057	1.02426	1.04142	1.03133	0.996643	1.00478	1.04606	1.03855	1.02919	0.868668	0.980895	0.945845	1.029	0.982017	0.988521	1.02748	1.00145	1.00998	1.00575	0.995323	1.03028	1.00607	1.00401	1.05854	1.03655	1.05421	0.987102	1.02333	1.03454	1.01375	1.0024	0.987405	1.02236	1.01947	0.989198	1.00301	1.05895	1.01001	0.983173	1.01301
cgp_1172	1.02457	1.00467	0.985541	1.00072	1.03738	1.00314	1.00627	1.02865	1.05074	0.978174	0.939977	1.01722	1.06206	1.06552	1.05606	1.06059	0.989974	1.03911	0.972841	0.983441	0.989047	1.01713	1.01321	1.03241	1.05791	1.02744	1.02866	1.06328	1.04853	1.03149	1.0431	1.03611	1.04879	1.02805	0.988048	0.983101	1.10868	1.02849	1.01783	1.04744
cgp_1641	1.03777	1.05531	1.03002	0.989895	1.0053	1.03631	1.00297	1.02548	0.971193	0.898617	0.975255	1.03014	1.06422	0.899853	1.0411	0.99836	0.997216	0.957804	0.92693	1.00286	1.04006	1.0668	1.04161	1.05284	1.04783	1.05209	1.02614	0.983345	1.03344	1.06185	1.04362	1.0658	1.05467	1.06389	0.975304	1.02646	1.02973	1.02801	1.01183	1.04614
cgp_2740	1.03975	1.01921	1.03983	1.03547	1.00654	1.05657	1.01858	1.02279	0.968588	0.909603	0.976171	1.01944	0.972162	1.05768	1.00698	0.93955	1.02033	0.970694	0.95307	0.985667	1.00329	1.02511	0.997003	1.02552	1.03365	1.02103	0.961908	0.999387	1.06134	1.02139	1.0039	1.0156	1.05778	1.04204	1.00078	0.998661	1.01811	1.00886	0.996955	1.02092
cgp_3309	1.03118	1.0333	1.00563	1.01735	0.978751	1.02918	0.963763	1.03313	0.95226	0.951266	0.910721	0.980529	0.879124	1.0646	0.997659	1.00834	0.982014	0.947449	0.930493	1.0053	1.04968	1.09472	0.998194	0.982727	1.00775	1.02914	1.00998	1.00473	1.02223	1.0133	1.02487	1.02514	1.00806	0.997088	0.970062	1.02179	1.01125	1.02861	1.00389	1.0224
dtxR	1.06156	1.04838	1.03112	1.00114	1.00824	1.04509	1.03626	1.02733	0.978985	0.968892	0.971452	1.02927	0.903247	0.99957	1.04335	1.04193	1.0229	0.967626	0.930909	1.08938	1.10258	1.07147	1.01517	0.96602	1.03972	1.04487	1.02835	1.02357	1.02275	1.07374	1.00574	0.956653	1.04087	1.04744	1.04578	1.02706	1.0085	0.890605	0.894807	0.974083
cgp_3268	1.02202	1.04361	1.0247	1.02068	1.00371	0.95613	1.02975	1.03638	1.03501	0.940202	1.05002	1.04287	0.936191	1.02249	1.03407	0.9497	1.00098	0.979182	1.00876	1.06482	1.1017	1.00928	1.05174	1.00159	0.959219	1.02246	1.03016	1.11229	1.01756	1.07395	1.04842	0.996766	1.05902	1.04229	1.0539	0.986298	0.929073	1.02755	1.05113	1.01255
cgp_1821	1.018	0.982441	0.994224	1.02223	1.03339	1.00794	1.06636	1.01705	1.02813	1.01782	0.940508	1.01739	1.01192	0.953788	1.02101	1.04222	1.02388	1.00443	1.02092	1.05538	1.09004	1.01405	0.989779	1.0071	1.03988	1.02553	0.967807	1.03763	1.06001	1.11646	1.07754	1.04968	1.06859	1.04046	1.07406	1.0885	1.04483	1.02593	1.0328	0.994354
cgp_1732	1.02594	1.00556	1.03169	1.03407	1.01866	1.02206	1.05861	1.02512	1.02575	1.01589	0.93902	0.948152	0.995922	0.843985	1.018	1.03124	1.00299	0.981504	1.01955	1.06291	1.00586	1.01063	0.959893	0.96543	1.02178	1.03568	1.02117	1.0123	1.04921	1.068	1.03436	1.03857	1.05297	1.03691	1.07427	1.02106	0.976706	1.02088	1.00276	0.991349
cgp_1600	1.06369	1.03689	0.984999	1.02193	0.971618	1.05841	1.03937	1.03984	0.968028	0.965713	0.926166	1.04908	0.970381	0.927444	1.02171	1.05111	1.03559	0.906967	0.87906	1.05586	1.0582	1.06376	0.971398	1.02963	1.00369	0.974208	0.969327	0.846664	1.04245	1.0672	1.06747	1.10896	1.00997	0.985351	1.03816	1.04267	1.05325	1.01057	1.02069	1.01509
cgp_0790	1.03733	1.02741	1.01805	1.02487	1.00476	1.03084	1.056	1.01504	1.0124	0.967314	0.995275	1.02028	1.03076	1.00745	1.03169	1.0463	1.03537	1.03405	1.06165	1.03838	1.14765	1.23331	1.03657	1.03111	1.02028	1.02203	0.996919	1.00708	1.0118	1.02121	1.02768	1.02592	1.02091	1.02552	1.03321	1.01874	1.04685	1.02525	0.972906	0.970419
sufR	1.00018	1.01833	0.996666	0.928125	0.98027	0.991031	0.935925	1.0107	1.00373	1.01936	1.03088	0.995826	0.990169	0.972553	1.01021	0.989318	0.984793	1.04188	1.04739	1.02348	1.12547	1.17821	0.989937	1.01916	1.00307	1.00468	1.04494	1.02502	1.03579	1.02401	0.989044	1.02028	1.04582	1.01195	1.02961	0.996188	1.04943	1.08753	1.00101	0.995374
actA	0.982703	0.961522	0.978221	0.972553	1.01366	0.991634	0.965479	0.979656	1.02705	1.01497	0.961842	0.961483	1.00398	1.00367	0.976422	1.04668	1.05293	1.07995	1.07283	1.01731	1.1444	1.23616	0.993906	0.981292	0.971859	1.03261	0.977078	0.978206	0.966892	0.965079	0.971926	0.954404	0.965581	0.968158	0.961394	0.982059	0.997648	0.983289	0.99981	0.992229
cgp_0185	0.987211	0.978306	0.999311	0.978995	0.962992	0.994121	0.986013	0.987728	0.962983	0.976506	0.946047	1.01385	0.989318	0.956854	1.004	0.988296	0.995679	0.997803	1.00001	0.970585	1.1399	1.19307	1.00865	1.01718	1.01631	0.947356	0.962106	0.970322	0.991122	0.99489	0.996077	0.989956	0.977673	0.998505	1.01072	0.997459	0.96252	0.994803	0.993055	0.959968
dapE	0.996355	0.983608	0.966876	0.946493	0.938496	0.965791	0.949124	0.977991	0.974062	0.848279	0.962825	0.990623	0.98059	0.940145	0.96145	0.905459	0.913724	1.00181	1.01362	0.942786	1.08856	1.13172	1.00765	0.986819	1.01782	0.993506	0.97969	0.982482	0.966998	0.97696	0.965098	0.98957	0.966149	0.989114	1.0097	1.00437	0.978975	1.02404	0.968752	0.954066
cgp_2592	0.889288	0.952174	0.989908	1.02867	0.995738	1.00912	0.988415	1.01101	0.993797	1.01422	0.892358	1.01423	1.05011	0.973458	0.969939	0.981491	0.985062	1.00495	1.00887	0.92806	1.08764	1.17547	0.980081	0.966355	1.06119	1.05568	0.962321	0.897419	1.00023	1.04271	1.00461	1.03204	1.01328	0.974215	0.990015	0.992872	0.948588	0.995868	0.982045	0.972394
cgp_0045	1.00992	1.02129	0.998078	0.991822	1.02359	1.01606	1.02719	0.994649	1.04696	1.04738	0.992123	0.975872	0.963028	1.05875	0.999	0.937888	0.946557	1.04729	1.07979	1.00283	1.06319	1.04255	1.01715	1.00069	0.990265	0.991478	0.993261	1.00548	0.996494	1.00368	0.905469	0.838419	1.01381	0.974769	0.993146	0.940099	0.995814	0.996414	0.984943	0.971822
cgp_2910	0.998702	1.00334	0.983983	0.966229	0.992739	1.02081	1.00422	1.01711	1.02709	0.974473	0.913974	1.02794	0.926366	1.076	1.00885	0.948972	0.954781	1.03506	1.03207	1.01285	1.01448	0.988152	1.00871	1.00672	1.00524	1.01106	0.989122	0.997267	0.999418	1.00128	0.929433	0.87264	1.00411	1.00973	0.979945	0.965546	1.0185	1.00915	1.00415	0.985532
cgp_0046	0.961178	1.01412	0.986723	0.98521	0.991514	1.02481	1.03489	1.00016	1.05342	1.00171	0.896597	0.920748	0.879873	1.05984	0.981292	0.924813	0.949043	1.03066	1.05479	0.959547	1.05283	1.02847	0.962707	0.96543	0.986416	0.978403	0.994872	0.96709	0.996998	0.960523	0.913142	0.829452	1.02351	0.986263	0.978864	0.964159	0.950471	0.980963	0.97984	0.955885
cgp_0938	0.975623	0.994884	0.985572	0.902735	0.908527	1.00904	1.01638	1.02543	1.06929	1.14224	0.900073	0.94475	0.901954	0.983109	1.01801	1.02219	0.943731	1.04894	0.99629	0.990713	1.09461	1.10267	1.01357	0.999127	0.959098	0.894585	0.972258	1.00975	0.992891	1.05396	1.00434	1.0431	1.02707	1.01047	1.0361	0.998971	1.03288	0.972154	1.00578	1.01147
mshB	1.028	1.00052	1.00127	1.01155	1.03361	1.02361	0.995771	1.01192	0.973646	0.977385	0.998333	1.00667	1.03908	1.03353	0.988641	0.931598	0.894667	0.859827	0.931582	1.01342	1.02401	1.02751	1.04143	1.0634	1.00363	1.10268	0.976723	0.990292	0.948402	0.988363	0.946603	0.901201	1.01139	1.0131	0.985981	1.00828	0.976994	0.984845	1.00846	0.998611
mshA	0.978097	0.980225	1.00541	1.03276	1.05432	0.988021	0.994303	0.988071	0.992045	0.94276	1.01136	0.972092	1.02083	1.01946	0.982689	0.913801	0.889885	0.887709	0.930238	0.988312	1.06333	1.09292	1.03348	1.06644	0.987379	1.0838	0.975556	0.976171	0.935782	0.946552	0.942359	0.900996	0.971246	0.999191	0.994444	0.998017	0.949539	0.980253	1.011	1.01317
mshC	1.02252	0.998706	1.02035	1.04923	1.08005	1.00315	1.01254	1.02825	1.00903	0.968726	0.916016	0.985963	1.02811	1.05366	1.00173	0.923727	0.876513	0.916138	0.931239	1.0137	1.05951	1.08366	1.02298	1.06627	1.021	1.08754	0.974835	0.983121	0.96046	0.986959	0.974742	0.929356	1.0016	1.01686	0.997091	1.01938	0.959521	1.01796	1.00881	1.01191
mshD	0.997637	0.994085	1.00868	1.02783	1.03445	0.998182	0.993146	0.991672	0.978951	0.922487	1.01654	1.00667	1.01971	1.07606	0.986017	0.888532	0.904218	0.948268	0.962896	1.00304	1.05602	1.09471	1.03953	1.05393	1.00964	1.05317	0.991575	0.992372	0.977038	0.966306	0.976212	0.951897	1.00912	0.993228	0.990955	0.998617	0.985951	1.00602	0.998496	1.02752
cgp_3173	1.00088	1.00532	0.990321	0.981385	0.957068	0.952156	0.932941	1.00255	0.982753	0.979421	1.03559	1.04113	0.995066	1.03553	0.992011	0.952778	0.972687	0.95148	0.931605	0.931309	1.00498	0.96957	1.00662	0.983296	0.995105	0.982567	0.990623	0.978029	0.974098	0.998685	1.02488	1.01811	0.982385	0.977559	0.95853	0.927163	0.97205	0.956907	0.994821	1.00234
cgp_3172	0.949192	0.983975	0.993682	0.976716	0.95196	0.967646	0.948777	0.992362	0.991505	0.967148	1.06026	0.971602	0.954969	1.0983	0.973636	0.952901	0.947249	0.920837	0.910726	0.926639	1.04957	1.08172	0.987781	0.945388	0.963961	1.00272	0.987422	0.975249	1.00772	0.975826	1.00376	1.03066	0.993704	0.994116	0.945619	0.933474	0.974716	0.966924	1.00901	0.999479
cgp_3250	0.908422	0.975439	1.05013	1.04806	1.04112	0.982155	0.991701	1.02683	1.02001	1.05474	1.06652	0.952346	0.992199	0.980789	0.988034	0.863715	0.86945	1.03928	0.964793	0.919403	1.02851	1.03029	1.01415	0.970276	0.998146	0.962589	0.979043	1.0565	1.01845	1.02802	1.00125	1.03936	1.0371	0.959269	0.928817	0.929965	0.906121	1.01172	0.974022	0.987726
cysD	1.07705	0.992337	1.01694	1.01185	1.07168	0.986492	1.09196	0.997195	1.07007	1.05539	0.99989	1.01687	0.877282	1.01564	1.02775	1.05081	1.0001	0.950542	0.858624	1.01275	1.07739	1.10504	1.04824	1.0681	1.02627	1.04136	0.999565	1.02669	1.05523	0.995564	0.973376	0.98237	1.01939	0.993414	0.876696	0.989671	0.95461	1.00273	1.00635	1.02158
cgp_0283	0.971587	1.04662	1.03403	1.09263	1.02312	1.03095	1.03565	0.964786	1.00949	0.955399	0.9957	0.989304	0.884446	0.996125	0.98722	0.927002	1.07208	1.01062	0.901715	0.902191	0.983723	1.03137	1.00032	0.98487	0.999819	1.04538	0.982412	0.986592	0.966479	0.873166	1.05572	0.990327	0.994329	0.985465	0.884792	0.977695	1.01923	0.996727	1.06702	0.995738
glgB	1.04736	1.02443	1.06472	1.16269	1.08234	1.03694	1.06794	1.06291	1.05515	1.03479	1.04581	1.04104	1.07902	0.953074	1.02157	1.0481	1.04231	1.07108	1.07014	1.03228	1.04831	1.05162	0.989643	1.00525	1.02955	1.0133	1.02559	1.00852	1.02525	1.03276	1.07527	1.09431	1.05778	1.05712	1.0289	1.05189	1.02883	1.03633	1.01991	1.0038
glgC	1.0521	1.02178	1.05545	1.13986	1.06859	1.04561	1.06707	1.05851	1.04505	1.03766	1.04561	1.03918	1.07059	0.979114	1.04531	1.01171	1.02539	1.01524	1.02413	1.03555	1.00734	1.00841	1.00364	1.01952	1.02495	1.02441	1.02059	0.994664	1.03337	1.03353	1.07711	1.09451	1.04568	1.06634	1.01924	1.04427	1.03429	0.996624	1.01812	1.00013
ppgK	0.998814	1.00868	1.01464	1.08875	1.07488	1.0286	1.07378	1.06573	1.10336	1.12364	1.0829	0.952025	1.0543	1.00714	1.01107	1.02699	1.05178	1.03889	1.00967	0.974486	1.05338	1.09484	0.989523	0.957238	1.01224	0.967697	1.02608	1.015	1.01518	1.02735	1.04491	1.06447	1.00407	1.04433	1.04514	1.05087	1.02354	1.00958	1.0131	0.997121
cgp_0280	1.06182	1.01669	1.02475	1.08345	1.08102	1.09189	1.06681	1.06585	1.10298	1.06372	1.13084	1.00444	0.968022	1.00067	1.04155	1.07261	1.02978	1.0896	1.06024	0.971842	1.10807	1.09988	1.01324	1.09133	1.01371	1.0423	1.06581	1.0541	1.02795	1.04022	1.07502	1.08652	1.03864	1.06932	1.08017	1.06145	1.01193	1.0157	1.0423	1.03566
cgp_0392	1.03996	1.07117	1.05908	1.04003	1.05791	1.08388	1.05825	1.00354	1.03942	1.07227	1.11434	0.980943	1.02727	0.965117	1.02999	1.07166	1.04195	1.01222	1.06954	1.00631	1.05119	1.04203	0.998986	1.08365	1.00762	1.08308	0.978784	1.02794	1.04573	1.06295	1.04931	1.05511	1.02324	1.06711	1.08404	1.01146	1.01851	1.0386	1.0491	0.991554
cgp_2155	1.03371	1.01962	0.967999	1.08647	1.06193	1.08259	1.09488	1.09978	1.04507	1.07686	1.00857	0.976746	1.00814	0.976924	1.07523	0.992595	1.10001	1.07624	1.06438	1.02223	1.02721	1.08313	1.00995	1.04364	1.04444	1.04551	1.03996	1.06428	1.08931	1.00612	1.04199	1.02319	1.05585	1.07081	1.04489	1.00506	1.10033	1.1104	1.03076	0.985619
cgp_1417	1.06848	1.02595	1.00184	1.08231	1.07344	1.06816	1.09181	1.07393	1.08235	1.05085	1.04137	1.00871	0.987384	1.01249	1.0564	1.03531	1.07414	1.01105	1.02573	1.06662	1.01862	0.984405	1.01867	1.0267	1.01492	1.03109	1.00145	1.03201	1.01915	1.07555	1.07138	1.05923	1.01918	1.05546	1.01043	1.04486	1.07741	1.00991	1.01315	1.02588
cgp_1336	1.02711	1.022	1.00577	1.03071	1.01925	1.01518	1.04094	0.981201	1.03675	1.08144	1.02212	1.05062	0.988883	1.02031	1.06488	1.0261	1.05632	1.0402	1.06128	1.08108	1.01409	0.990166	1.0661	1.06306	0.966015	1.01342	1.05751	1.02554	0.977815	1.05661	1.06329	1.04393	1.02558	1.05115	1.02147	1.0111	1.07612	1.01754	1.02415	1.00425
cgp_0465	1.0101	1.01039	1.02412	1.055	1.07194	1.01261	1.06129	1.0379	1.04617	1.05696	1.00045	1.0344	1.00091	1.01286	1.03836	1.03681	1.09647	1.07898	1.10013	1.00048	1.01634	1.00567	1.06093	1.07753	0.974655	1.0019	1.06445	1.04442	1.12166	1.06084	1.08107	1.10952	0.966754	1.0362	1.02411	1.06368	1.09634	1.05718	1.04185	1.05385
cysN	1.03462	1.04445	1.05686	1.08736	1.09923	1.04256	1.12261	1.03655	1.11786	1.07865	1.03023	1.03811	1.02192	0.958705	1.05131	1.10755	1.04814	1.01074	0.963978	1.0538	1.08482	1.13204	1.09212	1.04676	1.03356	1.05018	1.04947	1.04282	1.01041	1.03183	1.04734	1.02781	0.993754	1.03361	1.06182	1.0427	1.05287	1.04291	1.04793	1.03965
clpS	1.0267	1.03232	1.01461	1.0067	1.02063	1.04437	1.08341	1.02746	1.07636	1.11916	1.03833	1.00165	1.11873	0.971694	1.01989	1.07771	1.06906	0.973052	0.982951	1.02313	1.08899	1.13785	1.0102	1.04064	1.03831	1.06092	1.01188	1.02209	1.03669	1.03583	1.04907	1.08703	1.01533	1.02946	1.05354	1.08384	1.00209	1.00264	1.01795	1.01136
cgp_3261	1.00387	0.991955	1.01565	1.03367	1.10348	1.02798	1.0363	1.05184	1.15266	1.20484	1.04492	1.01581	1.03177	1.07094	1.00147	1.05356	1.07005	0.980345	1.01309	0.986447	1.02393	1.03387	1.05778	1.05599	1.03451	1.025	0.984218	1.02328	1.01036	0.973235	1.01975	1.01522	1.02352	1.00815	1.01497	1.03572	1.03378	1.00837	1.01853	1.01671
cgp_3419	1.05293	1.0108	1.01233	1.07274	1.09254	1.00789	1.07936	1.04581	1.13894	1.23793	1.04419	1.03952	1.06031	0.978443	1.03022	1.00183	0.9657	0.94712	0.978596	1.04513	1.02244	1.00878	1.05652	1.07168	1.00505	0.995894	1.02267	1.04986	0.97838	1.00641	1.01696	1.00358	1.0279	1.02923	1.0365	1.02413	1.00419	1.04774	1.02987	1.00525
cgp_1087	1.12492	1.10226	1.05817	1.07604	1.03565	1.09155	1.0435	1.05619	1.04966	1.07261	1.02689	1.07116	1.05966	1.03409	1.06688	1.0206	1.079	1.06538	1.04367	1.07784	1.08635	1.05006	1.00345	1.04537	1.07094	0.998928	1.03418	1.03853	1.06264	1.11335	1.01829	0.999744	1.09496	1.05501	1.05578	1.07747	0.940115	1.05032	1.05776	1.05163
cgp_1469	1.11767	1.05945	1.02723	1.07722	1.02116	1.08403	1.04573	1.03256	1.03463	1.00301	0.987224	1.11396	0.999804	1.01208	1.01182	1.047	1.01753	0.972233	1.01267	1.09379	0.993064	0.997313	1.02209	1.01411	1.01793	0.996383	1.02325	1.01777	1.02702	1.01741	1.02834	0.969245	1.06001	1.08441	1.02177	1.0791	0.955665	1.02563	1.01744	1.02479
cgp_2145	1.10869	1.06844	1.02528	1.07023	1.0862	1.07149	1.00694	1.03995	1.07947	1.11737	1.03517	1.00899	1.06624	0.973512	1.03507	1.04961	1.1069	1.01469	1.04562	1.13228	1.02188	1.00565	0.957441	1.03213	0.976222	1.04456	1.0235	1.06153	1.03783	1.06985	1.03138	1.00558	1.02987	1.07952	0.967612	1.01947	0.895955	1.04478	1.00691	0.969017
cgp_0454	1.00973	1.01745	1.06179	1.05146	1.0683	1.04773	1.03957	1.0487	1.04436	1.06216	1.05099	0.991093	1.00788	1.10887	1.0457	1.05096	1.04194	1.02737	0.981883	0.989818	1.03525	1.07227	1.09773	1.22408	1.06355	1.16574	1.03011	1.0594	1.0287	1.06365	1.03126	1.09303	1.03139	1.0232	1.04216	1.0537	1.01836	1.04197	1.0199	1.03582
cgp_3311	1.04326	1.09778	1.04745	1.04036	1.05998	1.03766	1.0888	1.10095	1.0452	1.12437	0.953621	0.994695	1.03102	1.15221	1.01062	1.04618	1.02815	1.04194	1.04126	0.966196	1.0463	1.0832	1.07617	1.10943	1.08874	1.07953	1.08656	1.12059	1.0133	0.965666	1.00765	1.05396	1.02737	1.01854	1.02788	1.04303	1.03116	1.00171	1.00616	1.0282
cgp_1448	1.00363	1.00744	1.04609	1.08637	1.05628	1.02509	1.05632	1.05209	1.09007	1.10921	1.03232	1.02974	1.09453	1.12233	1.01458	1.02567	1.02724	0.978885	0.994561	1.02707	1.0981	1.15838	1.03267	1.03009	1.00492	1.02321	1.00885	1.0212	1.00681	1.02039	1.0486	1.06969	1.0178	1.00935	0.99624	1.02257	1.00448	1.02882	0.994156	1.01779
tal	1.00903	0.971756	1.0135	1.07775	1.10269	1.01656	1.05943	1.02992	1.06547	1.10499	0.997985	1.00391	0.979475	1.10864	0.965861	1.00782	0.988202	1.02658	1.00794	1.0126	1.11692	1.15573	1.00597	1.00466	0.961256	1.04545	0.981199	1.01536	0.998443	0.995695	1.01045	1.0183	0.99886	1.00689	1.00776	1.03233	1.03507	1.03806	1.01889	1.03151
cgp_1240	0.985036	1.03294	1.03875	1.08659	1.07586	1.05787	1.07233	1.02688	1.03349	1.09135	0.969429	1.05535	1.0529	1.09839	1.03338	1.00949	0.990366	1.02901	1.03145	1.01956	1.12018	1.17223	1.041	0.990304	0.953671	1.01081	1.00343	0.955887	1.03811	0.967967	1.03501	1.0294	0.952574	1.06802	1.04407	1.03736	1.05215	0.971507	1.0047	0.977124
cgp_2860	1.00427	0.993501	1.0042	1.04345	1.06565	1.00072	1.02358	0.987194	1.06089	1.09046	1.02652	0.976921	1.01812	1.04505	0.980391	0.981655	0.983625	0.99807	1.01146	0.998746	1.17567	1.28149	1.00039	1.02147	0.983572	1.01675	0.958448	0.979777	0.961128	0.958899	1.0114	1.01209	0.985515	1.0143	0.984271	1.03786	0.97184	1.01346	0.99641	0.98584
cgp_0967	0.970898	0.972814	1.01562	1.03824	1.05701	1.00458	1.01891	0.9863	1.0761	1.12089	0.980675	0.952607	1.08412	1.06724	0.984278	1.0125	0.993388	0.942227	0.937583	0.989383	1.09265	1.16484	0.973691	1.00294	0.953499	0.987595	0.960932	0.965617	0.966766	0.978524	1.01573	1.02863	0.977682	0.978751	0.974951	1.02296	0.947204	1.00177	0.99823	0.983064
ilvE	0.944516	0.963835	0.996888	1.09095	1.11269	0.98595	1.00913	1.02425	1.12143	1.18466	1.00917	0.987659	1.08203	1.06356	0.967068	0.99512	0.997871	1.03472	1.00368	0.991715	1.12149	1.18972	0.977218	1.03685	0.972177	1.03051	1.02783	1.01782	0.987547	0.975638	0.969277	0.906816	0.989133	1.00664	0.947957	0.984579	0.976276	1.01921	1.00366	0.992532
cgp_1879	1.0197	1.01262	1.02583	1.00215	1.04406	1.05004	1.05882	1.02448	1.06799	1.0457	1.00091	0.984956	0.915963	1.01779	1.03956	1.03004	1.03535	1.06347	1.08069	1.05207	1.06753	1.03358	1.0101	1.00257	1.04139	1.03829	1.01248	1.01501	1.05335	1.03455	0.973745	0.913681	1.03674	1.07322	1.05302	1.02554	1.01681	1.04048	1.02282	1.00827
cgp_0044	1.01574	1.03796	1.02652	1.03123	1.05799	1.0361	1.0517	1.04548	1.07982	1.06492	0.958474	1.00732	0.960309	1.06093	1.01863	0.981281	0.989432	1.08086	1.09264	1.02717	1.07514	1.08155	1.03446	0.99922	1.04217	1.02278	1.0074	1.01532	1.01987	1.01728	0.955914	0.866593	1.04065	1.01325	1.01241	0.991143	0.994467	1.02427	1.0159	0.993353
cgp_2865	0.998196	1.00511	1.07289	1.02835	1.07287	1.1192	1.11072	1.04268	1.09076	1.01416	1.02397	1.06025	1.04466	0.98643	0.998933	1.03215	1.0817	1.10708	1.05325	0.995473	1.11442	1.17669	0.979952	1.02728	0.993723	1.041	1.03274	1.05077	1.03874	1.07124	1.0649	0.97485	1.0817	1.05076	0.960169	1.06188	1.07604	0.982673	1.04429	1.04481
cysY	0.995582	0.940866	1.04157	1.07672	1.0624	0.988309	1.04856	0.981807	1.04262	1.02104	1.02768	1.05169	0.921484	0.945811	1.039	1.05045	0.967488	1.01065	0.998365	1.03033	1.07468	1.12329	1.04006	1.08306	0.97849	0.96113	1.03227	1.01058	0.971386	0.989159	1.04455	1.05015	1.06298	1.01697	1.01378	0.990595	1.05134	0.97561	0.998051	1.00484
glgE	0.956338	0.975843	0.992133	1.08471	1.09735	0.996451	1.03423	0.979008	1.05953	1.05727	1.06664	0.971954	0.936641	1.02632	0.954587	1.04225	1.03871	1.07408	1.09046	0.93549	1.11537	1.13608	0.980216	0.974769	0.996596	0.975231	1.00411	1.01469	1.00001	0.989478	1.005	1.02863	0.973757	1.01209	1.02649	1.03891	0.988603	1.01639	1.02027	0.995515
cgp_0758	0.792565	1.05775	1.10992	1.07771	1.01468	0.988412	1.09597	1.15028	0.916052	1.08323	1.12408	1.01097	1.09552	1.05829	1.01931	0.94322	1.04294	1.06288	0.919591	1.11896	1.045	1.028	1.05248	1.01958	1.08046	1.04221	0.970951	0.923133	1.09264	1.05192	1.00378	1.0085	1.05092	1.07613	0.908722	1.07865	0.856137	1.11074	1.05017	0.945087
cgp_3381	0.798139	1.04145	0.901778	0.986608	1.11435	1.01007	1.04811	1.0134	1.00971	1.0691	1.02501	1.14879	1.05562	1.05399	1.02713	1.13979	1.0275	1.06101	1.03421	0.994529	1.03401	1.01328	1.12046	1.08552	0.913642	1.00816	0.989949	0.939118	1.03288	0.921317	0.900959	1.0069	1.08786	1.0491	1.01554	1.06782	0.75743	0.946989	1.03809	0.864561
cgp_0513	1.03464	1.03751	1.03952	1.02964	1.02583	1.05061	1.04444	1.05338	1.05209	1.03651	1.00593	0.964376	0.971334	1.01297	1.04186	1.01055	1.0677	1.04065	1.03838	0.964332	1.03811	1.0213	0.956122	0.99811	1.04484	1.05887	1.0143	1.02655	1.02783	1.00348	0.786606	0.680149	1.00843	1.00107	1.00031	0.986953	0.999012	1.02743	1.03614	1.00666
tgt	1.01265	1.04511	1.01695	1.02414	1.06589	1.01117	1.03622	1.01729	1.08679	1.11125	1.06068	1.01448	1.00489	0.95198	0.994301	1.03477	1.02843	1.03398	1.0246	1.01053	1.00762	0.99799	1.01722	1.01381	0.993626	1.01369	0.995538	0.983961	1.02084	1.0128	0.820522	0.592676	1.00836	1.00466	0.986211	0.989208	0.970244	1.00765	1.01864	1.01807
cgp_2412	1.02721	1.02402	1.02592	1.01231	1.01744	1.01425	0.980647	1.02724	1.02379	1.04749	1.01345	1.04836	1.06352	1.15033	1.04446	1.02542	1.01702	1.01998	1.00155	1.05412	1.03462	1.00199	1.02256	1.01787	1.02737	1.04138	1.03555	1.0404	1.03902	1.03335	0.813778	0.709623	1.03079	1.05128	1.00436	0.942832	1.02847	1.05387	1.02695	1.00134
cgp_1675	0.982652	1.03366	1.10201	1.12397	1.04815	1.06785	1.06014	1.09118	1.18251	1.18274	1.06853	1.04786	1.11764	1.1462	1.06456	1.01558	1.06878	0.995348	0.957866	0.99038	0.993202	0.91642	1.01526	0.969433	1.02356	1.03983	1.04693	1.05229	1.04443	1.04436	0.855087	0.737605	1.01015	1.03787	1.03005	1.00959	1.05145	1.00873	1.02397	1.00103
sigE	1.12745	1.02393	1.07391	1.05083	1.0402	0.942187	0.99078	1.05001	0.980619	1.00537	1.14738	1.06142	0.859871	1.20114	1.09827	0.890047	1.0093	0.940409	0.820872	0.94367	0.931525	1.01752	1.05072	1.026	0.969008	1.06863	0.952458	1.00479	0.926434	1.14753	0.936734	0.793284	0.927222	1.08916	0.867692	0.916491	0.832408	1.03006	0.995424	1.11227
cgp_0841	0.992244	1.0122	1.01446	1.0123	1.00359	1.01736	1.01366	1.01885	1.00567	0.986488	1.00466	0.989381	0.999076	0.992156	0.994707	1.00488	1.02127	1.00892	1.00954	0.998317	1.00308	0.996858	1.02052	0.999988	0.99547	1.01316	1.00096	1.0036	1.00388	0.997248	1.01312	1.01976	0.99708	0.990207	1.00569	0.995347	1.02324	1.00321	1.00904	1.01014
cgp_2678	1.01043	0.993668	1.0225	0.996235	1.0024	1.01547	1.01225	1.01149	0.993436	0.979992	1.00423	0.987254	1.00773	1.01124	0.997208	1.00291	1.01601	0.9977	1.01102	1.01399	0.993797	0.994369	1.01397	0.988607	1.00578	1.01451	1.00433	1.00919	1.00955	1.0165	0.988715	1.00865	1.001	1.00657	1.00326	0.999806	1.01088	0.998807	0.99304	1.00777
cgp_1009	0.997996	0.992756	1.01268	0.994559	1.02315	1.00403	1.01256	1.0104	0.987442	0.99179	1.01465	1.01357	1.00549	1.00239	1.00636	0.997324	1.00778	0.999256	1.02388	1.00741	1.01794	0.983139	1.02443	1.02508	1.00264	1.02453	1.00065	0.995489	1.00068	1.00613	1.00304	0.996153	1.01542	0.994322	1.01445	1.00341	1.01819	1.00635	0.996548	1.01065
gabD2	1.01412	1.00814	1.00117	1.02146	1.00349	1.01296	1.02088	1.00933	1.01181	0.968954	1.00467	1.01346	1.00665	0.990932	1.01495	1.00613	1.02381	0.999656	1.00691	1.01979	1.01318	0.98615	1.01517	1.02337	1.00139	1.0226	0.991072	0.994525	1.01301	0.997722	1.00726	1.01262	1.00534	1.00089	0.992617	1.01271	1.01218	1.00747	1.00621	1.0076
metB	1.01615	0.992949	1.01181	1.01253	1.01734	1.00872	1.01605	0.999093	1.00091	0.991346	1.01298	1.00315	0.992097	0.998329	0.991792	1.00242	1.02576	0.99143	1.01646	1.00762	0.998985	0.974955	1.01831	1.00892	0.991236	0.996907	0.995531	0.987762	1.00137	0.988247	1.00178	1.01321	0.988348	1.00268	0.992419	1.00874	1.02791	0.984625	1.00602	0.998802
prpC1	0.991326	1.02469	1.00801	1.00573	1.0105	1.02083	1.01392	1.00375	0.999215	0.992312	0.999862	1.02428	0.983623	0.991892	1.01099	0.999123	0.995736	1.01184	1.01054	1.04084	0.998489	0.992294	1.02122	1.00175	1.0061	1.01358	0.999185	0.994159	1.00559	0.999989	0.989514	1.00354	0.998612	1.00423	0.983058	1.00318	1.01177	0.982267	0.980904	0.996289
ilvA	1.00123	1.00217	1.01114	1.01201	1.01206	1.0207	1.00607	1.00437	1.00558	0.986065	0.986028	1.00368	1.03192	1.00138	1.00309	0.997088	1.01799	1.03176	1.00366	1.00133	0.999867	1.00098	0.997973	0.995327	0.983515	0.998822	0.997335	1.0207	1.00642	1.00542	1.01608	1.00317	1.00934	0.99935	1.00337	1.00695	0.988916	0.995562	0.994573	0.995788
cgp_2449	1.0045	0.984169	1.00086	1.0022	1.0058	1.01632	1.00526	1.00448	1.00623	0.965135	0.994441	0.986726	1.00559	0.987085	1.00374	0.990131	1.01077	1.01155	1.00909	1.00594	1.0136	1.01242	0.996604	0.994965	0.996791	0.992934	0.994636	1.00401	0.994121	1.00653	1.00913	1.02138	1.01401	1.00532	0.980315	0.982308	1.00605	1.00103	0.998665	0.996125
cmt5	0.990172	1.00563	1.02508	1.01646	1.00898	1.01945	1.0223	1.03064	0.999493	0.980797	1.00379	1.00305	0.988916	1.00227	1.00642	0.996847	1.00205	1.0008	0.995359	0.997365	1.00664	0.988811	1.01339	0.986845	1.00102	0.990484	1.00676	1.0104	1.0009	1.02047	1.00919	0.995246	1.00114	1.00797	1.01195	0.984462	0.989549	0.988833	0.989157	0.989503
qor	0.99602	1.01798	1.0059	1.00487	0.995546	1.01208	0.998768	1.00693	1.00544	0.977787	1.00421	1.00042	0.989912	0.993396	1.00271	1.00569	1.01714	1.00316	1.00054	0.99227	1.01487	0.997589	1.00561	0.99627	0.994754	1.00725	0.985199	1.01699	1.02742	1.00708	1.00397	0.995062	1.00584	1.00082	0.990889	0.985469	0.982637	1.00975	0.996957	1.00497
mmpL2	0.999996	1.01301	1.0097	1.0053	1.01103	0.99915	1.00438	1.00889	1.0063	0.99587	0.998516	0.993256	1.00764	1.01066	1.01826	1.01922	1.00099	1.01498	1.01153	1.01928	1.02364	1.00246	1.01652	1.01188	0.991438	1.01648	1.00365	1.00757	1.00752	1.0126	1.0143	1.01068	1.00005	1.00412	1.00749	1.00359	0.993635	1.0007	1.011	1.00286
benR	0.997872	0.999669	0.994255	1.00466	1.01633	1.01051	1.01818	1.01944	1.00345	1.00722	1.00754	0.990252	1.01459	1.01153	1.01005	1.01207	1.00302	1.01036	1.01679	1.01167	1.01806	1.0035	1.00081	1.00039	1.00523	0.995332	0.995723	1.00319	0.993459	1.01083	1.01925	0.993652	0.988251	1.00596	1.01112	1.00386	0.993479	1.00441	0.999548	1.00877
cgp_0535	1.01352	1.00243	1.00096	0.998206	1.02273	1.00995	1.01349	1.01875	1.01535	0.999303	1.00337	0.987946	1.00889	1.00653	1.00024	1.0079	1.01713	0.997519	1.01505	1.01332	1.00802	1.00187	1.0102	1.0047	0.984536	1.00134	0.994872	0.987454	0.994571	1.00923	1.00384	1.00595	0.990368	1.00642	1.00511	1.02412	0.997156	0.988613	1.01274	1.00159
cgp_0370	1.01405	1.01091	1.00591	1.01143	1.00826	1.00222	1.00258	1.00801	1.00544	0.997371	1.00594	1.02344	1.0129	0.987442	1.00119	1.01453	0.990906	1.00695	1.015	1.01062	1.00224	0.984029	1.0088	1.01136	0.998706	0.999366	0.996505	0.98687	1.00126	1.00367	1.00855	1.00036	1.00319	1.00137	1.00478	1.00804	1.0084	0.992005	1.00765	1.00805
dcp	1.01402	1.0107	1.01445	0.995857	0.997273	1.00789	1.01097	1.01721	1.00284	0.998873	0.999176	1.00436	1.0111	0.984554	0.998926	1.01135	0.998516	1.01606	1.00878	1.0131	1.01047	0.995234	0.994978	0.993752	0.9869	0.996943	1.00787	0.997469	1.00676	1.01144	1.00495	0.983655	1.00911	0.995582	1.01589	1.00244	1.01273	0.982673	0.997143	1.00439
seuA	1.01796	1.02036	1.02058	0.99916	1.01444	1.01351	1.02859	1.01795	0.999717	0.999622	0.994324	1.00605	1.01063	0.989152	1.00593	1.01868	1.01677	1.01475	1.01233	1.02627	1.01049	1.01382	1.01675	1.01433	0.989061	0.98983	1.00557	0.995744	1.01391	1.0206	1.01027	1.00819	0.999233	1.02859	1.03174	1.00136	1.00007	1.00993	1.00457	1.0072
cgp_2823	1.0031	1.00821	1.00855	0.997319	0.997428	1.00889	1.0322	1.01167	0.999255	0.990832	0.980281	1.01491	1.0017	1.00237	1.00966	1.01336	1.02134	1.00425	0.991022	1.01996	1.00733	1.00355	1.00979	1.00681	1.00147	0.996985	0.985509	0.988935	1.00328	1.00746	0.994054	0.988364	0.999861	1.00623	1.01433	1.01111	0.978494	0.994989	0.999848	1.00738
cgp_0714	1.0186	0.995036	1.01282	1.0031	1.01039	1.01283	1.01974	1.00651	0.999979	0.99244	1.00226	1.01492	1.02302	1.01482	0.999588	1.00765	0.987437	1.01866	0.996109	1.02858	1.01354	1.0034	1.01441	0.994508	1.01672	0.994209	1.00005	0.98596	1.01274	1.00702	0.991965	1.0248	1.00338	0.993119	1.01621	0.999655	0.994397	0.996117	1.00489	0.986143
cgp_1195	1.01052	0.994313	1.00206	0.998817	1.00444	1.02177	1.01441	1.03011	0.992705	0.99152	0.997338	1.03284	1.00317	1.00273	1.01739	0.998247	1.01602	1.01237	1.00438	0.994657	1.00279	0.992267	0.996107	0.999234	1.01754	0.986292	0.983208	1.00999	1.00577	1.01887	1.01123	1.02092	1.00461	0.995266	1.01157	0.997812	1.01623	0.985175	1.00997	1.00052
cgp_2598	1.00388	1.00035	1.01225	1.01005	1.01057	1.00495	1.02532	1.02033	0.993173	0.993226	0.98705	1.02317	0.982799	0.993875	0.993536	1.00337	1.02696	1.00795	0.994877	1.00137	1.00437	0.990537	0.99322	1.0008	1.04294	0.986282	0.997031	0.994467	1.01372	1.01359	1.01171	1.01461	0.996892	1.0044	1.01716	1.01649	1.01103	0.978222	0.987835	1.00983
phoD	1.01779	0.997432	1.02097	1.01422	0.986068	1.00927	1.01268	1.01848	1.00083	0.987933	0.97695	1.0342	1.01333	0.996551	0.999561	1.00777	0.999607	0.994726	0.994308	1.02113	1.00181	0.996618	1.00713	0.992476	1.02853	0.999976	0.992549	1.01455	1.01125	1.00983	1.00966	1.01867	1.00459	1.01751	1.00318	1.01271	1.02994	1.00513	0.995546	0.997078
cgp_2542	0.984338	0.989873	1.02146	1.0207	1.01715	1.00609	1.01846	1.00112	1.00473	0.991995	1.00017	1.01248	1.00252	0.99892	0.988448	0.99919	1.0272	0.981711	0.995624	1.00964	0.997996	0.998956	0.993766	0.992006	1.01548	0.977633	1.01583	1.01844	1.01855	0.998757	1.01336	0.99705	0.995411	1.01577	1.01827	0.997125	1.01182	0.99314	1.00769	1.00926
nadA	0.976192	1.00462	1.02661	1.0087	0.988736	1.01783	1.01772	1.00352	1.00401	0.993897	0.99065	1.01936	1.00211	1.01054	0.999933	0.993692	1.0228	1.00017	0.99387	1.02439	1.00491	0.990682	1.00393	0.980526	1.01172	0.988447	0.993516	1.00608	0.99378	0.999534	1.00307	1.00041	1.00842	1.00981	1.00177	0.981257	1.02329	0.974468	0.995809	0.98357
psp2	0.97515	1.00106	1.01848	1.00398	1.00834	1.03211	1.01495	1.02544	0.988104	1.00096	0.996335	1.0069	0.99368	0.990738	1.00739	1.00588	1.01921	1.01725	0.992123	1.02287	1.00299	1.00171	0.992018	1.01444	1.04203	0.995373	1.00828	1.01114	1.00193	1.01724	0.997657	1.01335	1.0358	1.00197	1.00555	1.01903	1.00058	1.00479	1.00503	0.996827
galT	0.990145	1.01597	1.01161	0.99668	1.01251	1.02207	0.998758	1.02871	1.01301	1.01615	0.985122	0.992691	1.005	1.00535	1.00432	1.00008	1.01911	1.00654	0.996538	1.01056	0.990878	1.01291	0.97996	0.998847	1.03769	0.992393	0.997398	1.00879	1.00279	1.01487	1.02401	0.999958	1.01259	1.01102	0.99896	1.03171	1.01152	0.982383	0.99575	0.989112
cgp_2969	0.985754	0.99768	1.00853	0.999175	1.00014	1.00936	1.01221	1.01688	0.989905	0.986097	0.997984	0.988034	0.986796	1.00939	0.990495	1.00731	1.02358	0.991445	0.997022	0.998756	0.998861	0.980881	0.996256	1.00986	0.975	1.00004	1.00335	0.989209	0.997448	1.00425	1.00824	1.0045	0.987698	0.991132	1.01296	0.99365	1.00019	1.00125	0.997004	0.991511
cgp_2621	0.996931	0.991751	1.0087	0.989898	0.996437	1.01957	1.0198	1.00248	0.990731	0.999841	0.995058	0.985409	0.981955	0.996036	1.01344	1.00253	1.0159	1.00393	1.00427	0.983729	0.991981	0.979423	1.00054	1.00809	1.00346	0.993228	0.992585	0.979509	0.985398	1.00222	1.00442	1.001	0.986421	0.985123	1.01634	0.987862	0.997771	0.991023	0.99479	1.00183
cgp_0839	0.965189	1.00109	1.00834	1.01084	0.993036	1.0258	1.01842	1.01667	1.00679	0.981416	0.997689	0.984565	1.00094	0.994482	0.997245	1.01256	1.01347	0.998743	0.995898	0.991362	0.992065	0.975127	1.01585	1.00276	1.00523	0.998398	0.999502	0.988686	0.998592	1.00845	1.00972	1.00422	0.984557	0.981443	0.997049	0.98267	0.992523	0.991224	1.0013	1.01011
pta	0.986425	0.983302	1.00338	1.00292	0.999598	0.99695	0.996059	0.998005	1.01388	1.00512	0.993876	0.978732	0.990984	0.982179	0.999154	1.01685	1.00967	1.00169	1.00191	1.00585	0.981517	0.979671	0.994598	1.00996	1.00563	0.970222	0.994345	0.991203	1.00564	1.0025	1.00226	1.00882	0.969338	0.988608	0.995559	1.00411	0.993435	0.987427	1.00446	1.002
cgp_0838	0.986232	0.993787	1.01393	1.0146	0.998271	1.01913	1.0248	1.01508	1.00999	0.991862	1.01189	0.991935	0.983068	0.981595	1.00017	1.01554	1.02341	1.00691	0.998515	0.981871	0.991268	0.994459	0.989434	1.0018	0.994142	1.00552	0.9969	1.00182	1.01733	1.00738	0.997025	0.995971	0.993951	0.991403	1.01509	1.01627	1.0019	0.994522	1.00064	1.00572
cgp_2822	0.974159	0.999045	1.01234	1.00635	1.00315	1.00827	1.00362	1.01784	0.997196	0.976672	0.994665	0.961829	0.983302	0.969356	0.989264	1.02082	0.998565	1.00158	1.00264	0.992408	0.993998	0.974715	0.990178	0.99258	1.00763	1.00863	0.997982	0.991604	1.00725	1.00415	1.00633	1.00347	0.987493	0.994193	1.00151	1.0096	1.01015	1.00706	1.00006	0.991942
qsuB	0.996403	0.995755	1.00783	0.992343	1.0022	1.00301	1.00774	1.01059	0.999885	0.998622	0.990569	0.98004	1.01034	0.977458	1.00027	1.00455	1.01105	0.986036	0.997644	1.02103	0.995796	0.992142	1.00655	1.01626	0.988557	1.00356	0.989645	1.00064	1.00905	1.02297	1.00803	1.00857	0.995634	0.989462	0.996668	1.00465	0.978199	1.00227	0.995816	0.995558
cgp_3192	0.997223	1.01162	0.989306	1.00182	0.990142	0.998327	1.01098	1.01144	0.998098	0.985237	0.984297	1.00669	0.991686	1.00133	1.00687	0.989636	1.00318	0.976843	0.995839	1.00182	0.999511	0.984015	1.00225	1.01663	0.990013	1.0148	0.986429	0.993259	1.00512	1.0013	0.996702	0.994126	0.982339	0.989815	1.01227	1.01202	0.995315	1.00888	1.00415	0.996936
cgp_2966	0.997938	0.98367	0.993556	1.00203	1.0097	1.00687	1.00934	0.99977	0.997595	1.0081	1.0018	0.995719	0.998785	0.998978	0.994285	0.995256	1.00965	1.00722	1.00574	0.999205	0.995731	0.991954	1.00556	0.997946	0.993428	1.00991	0.998959	0.989212	0.974863	1.00094	1.00138	0.989749	0.994512	0.98927	0.997807	1.00938	0.987366	1.00423	0.993178	0.995311
cgp_0624	1.01876	0.978247	1.0081	0.993946	1.00195	0.991126	1.00284	1.0063	1.00548	1.01355	0.982406	0.973642	0.996883	0.991032	0.993882	1.00566	1.01176	0.988877	0.988434	0.998428	0.996453	0.973051	1.01162	0.99712	0.995424	1.01805	0.99039	0.977237	0.989107	1.00457	0.989475	0.977258	1.0103	0.988683	1.00347	0.995177	0.994578	0.997974	0.996455	1.00393
bioA	0.987485	0.982785	1.02296	1.00694	1.00789	1.00971	1.02478	1.01997	1.01427	0.99789	0.987058	0.974226	1.0156	1.00699	0.994244	1.01802	1.03159	1.00363	1.00561	0.982162	1.00369	0.99738	1.00853	1.01351	0.996118	1.01394	1.02035	0.98252	1.00046	1.0134	0.990146	1.02342	1.00387	0.994811	1.00809	1.01664	0.999811	1.00549	1.01642	1.00977
cgp_0592	1.01322	0.98005	1.00409	1.01268	1.00923	1.00657	1.00992	1.01585	0.997848	0.977457	0.977004	0.982071	1.00808	0.995048	1.01079	1.00441	1.01997	0.995502	0.990839	0.976698	1.01051	0.998328	0.999237	1.00348	1.00463	1.00821	1.00491	0.994249	0.979289	1.01281	0.996168	1.00646	0.997836	0.987914	1.01257	0.996003	1.02204	0.98477	0.995687	0.995652
accDA	0.984047	0.981806	1.00432	1.02345	1.01714	1.01621	1.01928	1.01115	1.00739	0.989963	1.00442	0.968994	1.00704	0.981249	1.00537	1.00864	0.99049	0.988886	1.00244	1.00415	1.01531	0.986872	1.02278	0.973782	0.98719	1.01563	1.00699	1.0137	1.01507	1.01337	1.01489	1.00623	0.998285	1.0019	1.00102	0.993456	0.99478	1.00642	1.00482	1.00198
cgp_2932	0.996854	0.983734	1.00188	0.991191	0.999637	0.999247	1.00519	1.02263	0.99952	0.990734	1.00682	0.975283	1.0252	1.01586	1.00437	1.01114	0.990908	0.988786	1.00643	1.00272	1.01212	0.97579	1.03148	0.991445	0.991832	0.988285	0.993038	1.00386	1.00462	1.00147	1.01063	0.99639	0.987738	0.9949	1.01757	1.01852	0.992047	0.987715	1.01395	1.00499
pduO	1.00854	1.00623	1.00606	0.995017	1.01168	1.00819	1.01193	1.00428	0.99601	0.989147	0.97479	1.03224	1.02374	0.973723	0.990246	1.01454	1.01083	0.992618	1.01563	1.03529	1.01595	0.979702	1.02812	0.990773	0.998769	1.01275	1.00731	0.986979	1.0171	1.0288	0.999482	0.985673	1.00964	1.01039	1.01325	1.0123	1.02071	1.01539	1.021	0.999203
cgp_0083	1.02016	1.00896	1.01411	0.981554	1.01031	0.991049	1.00458	1.01099	1.01017	1.01778	0.980706	1.03084	1.00302	0.957693	0.983412	1.00814	0.997107	1.00783	1.00491	1.00574	1.00751	0.976857	1.00593	0.98797	1.01641	0.999531	1.01528	1.01449	1.00507	1.01961	1.0123	1.01005	1.00571	1.01092	1.02973	1.01901	1.009	1.03123	1.01303	1.00153
cgp_1212	0.995334	0.988021	1.01867	0.991329	1.00737	1.03341	1.00693	1.03134	1.01421	0.98165	0.961567	1.02584	1.01288	0.995162	0.993109	1.01107	1.02433	0.99788	1.0231	1.00868	1.00978	1.00426	0.990978	1.00868	1.02203	1.01251	1.00048	1.00164	1.01489	1.02917	1.00832	1.01186	1.01307	0.994163	1.02945	0.990241	0.997879	1.00532	1.00639	0.998216
pab	0.990111	0.967684	1.03447	0.993078	0.98859	1.01133	1.01193	1.02209	1.00633	0.985963	0.971905	1.03014	1.00392	1.00361	1.00592	1.01066	0.997123	0.995435	1.00132	0.991051	0.984214	0.981008	1.00866	0.993912	0.998086	1.00971	1.00817	1.01331	1.02849	1.02363	0.991809	1.01172	1.01735	1.00877	1.02155	1.00692	0.999914	0.99813	1.00374	0.986191
cgp_2715	1.01444	0.998115	1.02302	0.99131	0.993306	1.03052	1.01956	1.0294	1.01069	1.01539	0.968742	1.02761	1.02938	0.965566	0.981267	1.002	1.00862	0.994675	1.00128	1.01266	1.00318	0.981157	1.00976	0.99886	0.994253	1.00478	1.00253	0.967061	1.0204	1.01728	1.00168	1.0195	1.01665	1.02391	0.983211	0.985332	1.01042	0.991802	1.01034	1.03036
cgp_2401	0.977461	1.006	1.0273	0.991375	1.02979	1.01332	1.04362	1.03892	0.99871	0.996258	0.989536	0.981031	1.01187	0.974734	1.04743	0.997188	0.990575	1.00294	1.02272	0.992271	1.01421	0.948337	0.996989	0.999593	1.02357	0.974218	1.00179	0.999697	1.0262	1.03448	1.03691	1.01388	1.01316	0.970301	0.998824	0.983014	1.00191	0.993992	1.01241	1.01086
cynX	0.998547	1.00369	1.0106	0.994694	1.00441	1.02195	1.02089	1.00175	1.01522	0.989018	1.01153	0.972921	0.992268	0.932341	1.00547	1.01995	1.00364	1.01962	0.986078	1.00352	0.976302	0.977084	1.01461	0.987539	0.951175	1.00941	1.0009	0.992165	1.00845	1.0159	1.01207	1.00776	0.999297	1.00931	0.992683	1.00052	1.03444	1.01228	1.01425	0.99841
cgp_1097	0.98272	1.00399	1.00693	1.03199	0.990071	1.03027	1.04126	0.985931	1.01419	0.972862	0.978116	0.9626	0.991417	0.963844	1.01131	1.00709	1.01464	0.989082	0.993842	0.975041	0.988571	0.978136	0.992788	0.963126	0.965837	0.997694	1.00085	1.00018	1.01056	1.03716	1.02978	0.993817	0.994536	0.992413	0.996866	0.990614	1.01493	1.00764	0.997795	0.997512
cgp_0443	1.01916	0.962242	0.987729	1.0162	0.984149	1.02148	1.02879	0.992129	1.01898	1.00948	0.962247	0.959534	0.982328	0.965205	0.994082	0.996797	0.987229	1.00796	0.987289	0.995002	1.00796	0.983216	1.02923	1.00487	0.981359	1.00833	0.998432	0.992146	1.00294	1.0081	1.03063	1.0001	0.98041	0.996531	0.998233	0.962806	0.974586	0.99311	1.01425	0.996555
cgp_0286	0.944176	0.974406	1.00989	1.00639	1.00465	1.02935	1.02739	0.996723	0.988433	1.01854	1.00431	0.978219	0.983832	0.979462	1.01279	1.00258	1.00969	1.00729	0.99124	0.999656	1.00168	0.968169	0.997191	1.01257	0.977329	0.994424	0.992277	0.978739	1.00922	0.987117	0.976509	0.981652	0.999324	1.00082	0.988049	1.00914	1.01295	0.998273	1.00725	1.0031
cgp_3131	0.959048	0.98145	0.997807	0.998384	0.996706	1.01708	1.01356	0.991175	1.00894	0.99397	1.01607	0.993541	0.991103	0.983623	0.987059	1.01222	0.999557	0.997149	0.990457	0.977637	0.982304	0.979598	1.01242	0.998001	0.982873	0.983103	0.996508	0.991152	1.00294	0.988356	0.988338	0.995537	0.99987	0.985624	1.00431	0.982222	1.019	0.985394	0.988864	1.00464
bioD	0.963365	0.95714	0.992943	0.997014	1.01559	1.03235	1.04071	1.02278	1.00869	0.97198	0.963002	0.979922	0.981404	0.962744	1.00185	0.993444	1.02938	0.999013	1.01422	1.00946	0.993839	0.971162	1.01075	0.999837	0.980595	0.998533	1.01998	1.02633	1.00906	1.01074	1.00719	1.02859	1.02414	0.994704	0.993562	1.00757	1.02334	0.981382	1.0101	1.01336
cgp_2539	1.00512	0.983484	1.01165	0.997032	0.998258	1.00215	1.01907	1.00014	0.991208	0.964847	1.00155	1.00313	0.999077	1.01938	0.991439	0.984678	1.0003	1.0015	0.995855	1.00727	1.00259	0.986075	0.993075	0.976358	0.985471	1.00658	0.994077	0.97993	0.997724	1.02551	0.995835	0.991118	1.0075	0.999912	0.981774	1.00115	0.952935	0.995123	0.979742	0.983632
cgp_2470	0.993688	0.985909	0.976674	0.992958	0.979375	0.997702	1.01805	1.00116	0.98115	0.995018	1.00656	0.986253	0.998882	1.02278	0.996803	0.994867	1.00456	0.992792	0.985363	1.00516	0.9838	0.980294	0.993897	0.96883	1.00065	0.987906	0.999882	0.976987	1.00119	0.993602	1.00213	0.99256	0.995018	0.999682	0.989618	1.00064	0.966399	0.986702	0.976515	0.993668
cgp_1239	0.999452	0.986814	1.00784	1.0025	0.990907	0.996197	1.01506	1.01357	1.00734	0.99161	0.988107	0.999754	0.979793	1.00521	1.00783	0.977752	1.00354	1.00037	1.00145	1.01858	1.00647	0.994879	0.94677	0.953284	1.01049	1.01147	1.00225	0.986588	0.993542	0.996129	1.00702	1.00618	0.987057	1.00339	0.997288	1.00397	0.948904	0.968124	0.995088	0.995968
cgp_2918	0.995201	0.984323	0.995637	0.986351	0.99345	1.00807	1.00214	0.998915	0.99965	0.968844	0.986747	1.00982	1.00283	0.999392	1.00603	0.981663	0.993288	0.99516	0.998024	0.997244	1.03628	1.00124	0.998097	0.989044	0.98418	1.00338	1.00531	1.01062	1.00936	0.983366	1.01073	1.01119	1.00541	1.01675	0.971221	1.01309	0.960724	0.982982	1.02401	0.999537
cgp_0747	1.00069	1.00237	0.981435	0.997155	0.992849	1.02521	0.98302	0.997478	0.981278	0.997914	0.983597	1.01744	0.986702	0.971767	0.990515	0.982778	1.01649	0.989011	0.979017	0.99196	1.00489	1.00182	1.0073	0.97825	1.00341	1.01881	0.995041	0.992099	0.998164	0.990406	0.998895	0.987562	0.972614	1.01494	0.985959	1.01396	0.966301	0.988582	0.995983	1.01032
cgp_2714	1.00333	0.993085	1.02614	1.01479	1.00425	1.02255	0.999356	1.01243	0.987909	1.0103	1.016	1.00704	0.98523	1.00931	0.982264	0.977308	1.01908	0.989573	1.00671	1.00413	0.993837	1.00607	0.997682	0.9902	1.00075	1.00534	0.996099	0.975418	1.03567	0.993819	0.997022	1.01454	1.0029	1.01051	0.994183	0.991232	0.987575	0.978063	0.985141	0.99791
cgp_1020	1.00151	0.988631	1.01865	1.00787	1.00245	1.01381	0.993638	1.00915	0.986013	0.977841	1.01211	0.995602	0.982427	0.973338	0.998633	1.01021	1.00314	0.986014	0.990052	1.00665	1.00249	0.968163	1.00815	0.986743	1.00134	0.99888	0.998796	0.980019	1.01157	1.00617	1.01019	0.995224	1.0096	1.01984	0.985683	0.985469	0.958147	0.976275	0.98156	0.995847
cgp_1021	1.03148	0.993106	1.0199	0.995298	1.00423	1.03006	1.004	0.990645	0.976119	0.994963	1.00262	0.987965	1.00044	0.992859	1.02167	1.00009	1.00996	0.993944	0.998647	1.02689	0.984912	0.997395	1.0012	1.00115	0.981559	0.986927	0.997274	0.995383	1.0173	0.979824	0.989746	1.00341	0.997511	1.00224	0.975321	0.965053	0.971225	0.990007	0.995523	1.00252
cgp_2440	1.01355	0.985692	1.00183	0.986731	0.989158	1.01363	1.00921	1.00995	0.987048	0.967782	0.973188	0.988187	1.00073	0.975168	0.995901	1.00425	1.00899	1.00147	1.00214	1.0077	0.978093	0.976853	0.994181	0.987985	1.00575	1.004	1.00224	0.990804	1.02131	1.00681	0.998609	0.978393	1.00481	1.00713	0.999299	1.0068	0.968227	0.984899	1.00306	0.984362
cgp_0780	1.01653	0.985931	0.999315	0.988542	0.986864	0.992514	0.999921	0.989447	0.986368	0.96217	0.967451	1.0035	0.994382	0.97609	0.99107	1.00964	1.00451	1.01563	0.985993	1.00419	0.977472	0.980097	1.01727	0.998997	0.99513	0.973768	0.984631	0.986871	1.00821	0.999824	0.979428	0.96751	1.00573	1.00496	0.984549	0.984938	0.974774	0.982128	0.995683	0.985191
cgp_1016b	1.01269	0.987075	1.00932	0.998032	1.0013	1.00599	0.987207	1.01107	1.00287	0.984049	0.976026	0.981122	0.975301	0.975375	0.996822	1.00951	1.00254	1.00182	1.01317	1.00245	0.978683	0.973605	0.97506	0.995086	0.968481	0.990496	1.00243	0.986568	0.986801	0.995367	0.998975	0.978691	0.985899	0.990202	0.981757	0.96419	1.00527	0.980801	0.998306	0.99541
cgp_3083	1.00695	1.00212	1.03593	1.01954	0.995212	1.02103	1.01308	1.00404	1.0015	0.979653	0.994686	1.00514	0.983955	0.989017	0.99266	1.0036	1.01176	1.00771	0.980504	1.01213	0.990443	0.983598	0.990647	0.982883	0.988599	0.999059	1.00733	1.00493	0.995615	1.00599	0.981718	0.990338	0.985396	1.01335	0.998916	1.00194	0.973109	1.00196	0.993143	1.00965
cgp_0977	0.989048	0.991646	1.00448	1.00845	0.999528	1.01515	1.00827	1.00504	0.990676	0.986786	0.963146	0.988001	0.993578	0.993691	0.996965	1.00207	0.996388	0.990828	0.977804	0.998062	0.975428	0.970476	1.0004	0.967291	0.989274	0.96947	1.00473	0.992604	0.986934	0.987963	0.99109	0.989648	0.987245	0.988785	1.00012	0.990592	0.973152	0.994442	0.993749	1.00456
cgp_0395	0.995628	1.00292	1.01286	0.989728	1.00265	1.00812	0.994182	0.979792	1.01186	1.004	0.965322	0.989021	0.967604	0.991281	0.993923	1.00756	1.00874	1.00297	0.97087	0.995729	0.997724	0.961871	0.995477	1.02953	0.975862	0.993361	0.98822	0.98754	0.985514	1.00068	1.00786	0.983694	0.999055	0.996969	0.993208	1.02755	0.982824	0.995013	1.00367	0.986721
cgp_2256	0.977125	0.990542	1.00201	0.989251	0.986228	1.01142	1.01442	1.00484	0.981433	1.00314	0.953913	0.995496	0.963829	0.965486	0.997323	1.00965	0.989557	0.995239	0.994726	1.00127	0.983775	0.985494	0.96114	1.00202	0.98942	0.992807	0.997134	1.00293	1.00168	1.02351	0.99999	0.985955	1.00177	1.01749	0.996314	1.00974	0.974676	0.997953	1.00406	0.98007
cgp_2356	1.00478	0.999697	1.0243	0.987902	0.975487	0.976599	0.98921	1.00755	0.986932	0.99213	0.972749	1.03345	0.986114	0.937944	0.994301	0.98621	0.999108	0.988427	0.981397	1.04071	0.994771	0.968814	0.99641	1.01419	0.959154	0.976891	0.997076	0.991094	0.998888	0.989471	1.01494	1.01476	0.985154	1.00552	0.995252	1.00511	0.976621	0.981922	0.991862	0.993748
cgp_2993	1.04532	0.992036	1.0451	1.00299	0.980158	1.01487	1.03055	1.03546	1.00964	0.987159	1.01956	1.00853	0.979195	1.0018	0.999718	0.992314	1.01776	0.994358	1.01908	1.01747	1.02193	0.983029	0.999518	1.00518	0.975314	1.02153	1.00489	0.965873	1.04482	0.984733	1.01031	0.998271	1.02291	1.01051	1.01445	1.01027	1.01502	0.977429	0.997007	0.989666
cgp_0216	0.999823	0.968558	1.04455	1.00696	1.00372	0.99155	0.99989	0.997514	1.00619	0.970273	1.01663	1.02938	1.00762	1.01758	0.988848	0.988898	1.04988	1.00399	1.03663	1.01847	1.01281	0.987014	0.997783	1.01719	0.989045	1.0086	0.999727	0.995653	1.01453	0.980427	0.985405	0.989676	1.01785	0.999819	1.02623	0.989229	0.976174	0.966665	0.994086	1.0211
cgp_3342	1.04497	1.00636	0.99564	1.00608	1.01658	0.984394	1.01644	1.02592	1.00423	1.0088	1.02367	0.976668	0.988472	0.982952	1.00149	1.00636	0.998826	1.00924	1.03536	0.975636	1.00154	0.973349	0.997362	1.00352	0.976313	1.02351	1.01424	1.01157	1.02217	0.982219	1.0224	0.994934	0.981896	1.012	1.02175	1.00418	0.924048	0.993179	1.00853	1.00766
iunH1	0.996907	0.993836	1.00587	0.998775	1.01319	1.00813	0.997359	1.02386	1.02121	1.02226	1.02004	1.00414	1.01286	0.987384	0.996984	1.00851	1.02233	1.01612	1.01094	0.994167	0.998362	0.986038	1.00357	0.981137	0.936881	1.00925	0.988342	0.985993	1.02372	1.00021	0.966199	0.972391	0.986816	0.997909	1.02105	0.992506	0.948293	0.986391	1.0028	0.997576
dnaE2	0.994747	1.00921	1.00139	0.993078	0.998909	1.00991	1.01328	1.00703	0.99496	0.993504	1.01238	0.997749	1.0144	1.00274	0.995691	0.997101	1.00649	0.991286	1.00458	0.994494	0.996721	0.979231	1.00166	0.992991	1.01618	0.998055	0.996239	0.994775	0.996083	1.00549	1.00372	1.01078	1.00433	1.00265	1.00066	0.99929	0.993391	1.00323	0.999657	1.00122
aceB	0.9955	0.988865	0.992318	0.986804	0.997132	0.999329	1.00765	1.00678	1.00339	0.986837	0.983396	0.989635	1.01229	0.993247	0.991992	1.01281	1.00135	0.985305	0.998585	0.99175	0.986132	0.986284	0.992944	0.993188	1.02173	0.996797	0.977265	0.991476	0.983203	0.992504	1.00516	1.00527	0.993495	0.994794	0.987157	1.00885	1.00742	0.999629	0.999693	1.00709
metY	0.989155	0.993698	1.00498	0.999153	1.00666	0.991448	1.01707	1.00291	1.00181	0.978426	1.00644	1.0042	1.0015	1.00453	0.98147	1.00897	0.99554	1.00307	0.996875	0.998108	0.992809	0.976393	1.00747	1.01011	1.01445	0.981527	0.994407	1.00515	0.990039	1.00318	1.00424	1.0066	0.99113	0.991021	0.994093	1.01032	1.02086	0.988754	0.998311	1.00081
cgp_0842	0.982038	0.992012	1.00078	0.992583	0.99215	0.997612	0.99521	0.991869	0.99243	0.977957	0.998522	0.999683	0.995679	0.999108	0.993845	0.992356	1.00172	0.999158	0.997166	0.984602	1.01089	0.984505	1.00076	0.977328	1.01823	1.00069	0.986604	0.997426	0.981498	0.996542	1.002	1.00382	0.991409	0.995569	1.01064	1.0084	1.00761	0.991958	0.994131	0.98886
cgp_3104	0.988682	0.994251	1.00427	0.993779	0.99553	1.00359	1.00208	0.978908	0.997416	1.00102	1.00906	0.989722	0.981131	1.01086	0.98018	1.00238	1.00754	0.993977	0.990524	0.985962	0.997209	0.979892	0.987784	0.996078	1.00255	1.00368	0.992286	0.993037	0.989985	0.98929	0.989772	0.996548	1.00468	0.994295	0.996131	1.00779	0.991544	0.990975	1.00043	0.993166
nagB	1.00904	1.0061	1.00479	1.00196	1.00229	1.01171	1.01338	1.01156	0.987909	0.991565	1.0001	1.01898	0.977614	1.01282	1.00145	1.00125	1.01099	0.989093	0.9956	0.996969	1.00033	0.985231	0.991294	1.00745	1.00394	0.976622	1.00002	1.00766	0.986388	0.99932	0.991122	1.01523	1.00141	1.00329	1.0037	1.00787	1.00133	0.984211	0.992122	1.00221
nagA1	1.01197	0.988031	0.998297	0.995967	1.00118	1.0173	1.0035	1.01069	0.983933	0.98943	1.00714	1.00358	0.970715	1.00481	0.993495	0.998303	0.999642	1.00756	1.01209	1.00485	0.991965	0.987929	0.982118	0.986219	1.0033	0.997921	0.999474	1.00199	1.0034	0.996183	0.989155	1.00171	0.998866	0.987686	0.999117	1.00903	1.01555	0.975364	0.998237	0.985741
glcD	1.00374	1.01134	1.00807	1.01905	1.00159	0.996758	0.997964	1.0172	0.996929	0.993657	1.00302	0.99593	0.983073	0.998478	1.00088	1.0023	0.998551	0.982399	0.992669	0.99729	0.995134	0.985535	0.976969	1.01188	1.01908	0.996091	0.993116	0.982474	0.991509	1.00944	1.00936	1.00677	0.996737	0.991482	1.00783	1.01381	1.02109	0.981796	0.994226	0.985504
cgp_3243	1.00523	1.01009	0.994197	1.00021	1.00074	0.99644	1.00599	1.00418	0.995708	0.970183	0.987313	0.991769	0.971904	1.00635	0.995656	1.01224	1.01246	0.996369	1.01585	0.991895	1.0004	0.98964	0.988708	1.00399	0.996533	0.981033	0.989208	0.967757	0.995842	1.00056	0.991985	1.01449	0.984862	0.99377	0.989613	1.02251	1.00498	0.988853	0.998423	0.993385
cgp_0701	0.991518	0.997906	1.01217	1.00361	0.991006	0.998762	0.982099	1.01166	1.01838	0.962414	0.994538	0.970295	0.998377	1.00591	0.99428	1.00906	1.0061	0.987469	1.00769	1.00776	0.998066	0.994274	0.996592	0.989121	1.01776	0.981494	0.98459	1.00437	0.985398	0.986617	1.0053	1.01138	0.999208	0.996276	1.00166	0.986812	0.98809	0.988995	1.0036	1.00768
cgp_2227	0.985712	0.986941	0.986456	1.00716	0.991699	1.005	0.994208	1.0086	0.98648	0.970485	0.97344	0.989746	0.995173	1.0081	0.992483	1.00013	1.01023	1.00168	0.995547	0.998619	0.993394	0.960411	1.00091	1.00583	1.0209	0.988977	1.00509	0.988105	0.995183	0.995408	0.998464	1.00168	1.01811	0.996338	1.01307	0.975935	0.990022	1.01259	0.991446	0.999782
maf	0.989631	0.981762	1.00666	1.01886	1.00123	0.989862	1.00551	1.00505	1.00106	0.994469	1.02349	0.988862	0.999134	1.01184	0.997343	1.01311	0.99679	0.990992	0.995333	0.99397	0.987826	0.971073	1.00422	0.98697	0.994447	1.01308	0.986991	0.976897	1.00413	1.00988	0.992481	0.994344	1.00524	1.01239	1.0056	0.999193	0.996081	0.989375	1.01004	0.996085
pcaO	0.981451	0.98679	1.01085	0.997277	0.997918	1.00108	0.996771	1.00356	1.001	0.978874	0.999654	1.01365	1.00298	1.00367	0.992248	1.00358	0.990051	0.985926	0.999	1.01556	0.972982	0.965144	0.993481	0.987068	0.972213	0.997976	0.99726	0.96379	1.01377	0.980992	0.99646	0.999021	1.00469	1.00867	1.00834	0.998231	1.00112	0.988294	0.991966	0.992989
cgp_2709	0.992677	1.00984	0.999034	0.998178	0.99785	0.998908	1.00741	1.00685	1.00738	0.976301	1.01996	0.987282	1.00932	1.01374	0.982269	0.996513	1.02151	1.01184	1.0019	1.01824	0.983939	0.981931	1.01137	0.98121	0.996319	0.995675	0.963695	0.987266	0.995907	1.00038	0.987886	0.996672	1.00087	0.995277	1.01681	1.00156	0.993644	0.991771	0.997983	0.997389
sigM	0.992634	0.999725	0.996387	1.00818	1.00783	0.988887	1.00395	0.992924	1.00156	0.993646	0.98644	0.996892	0.980084	1.0185	0.985229	0.999883	1.01235	0.99444	0.991123	1.00476	0.97088	0.986453	0.98425	1.00431	0.996213	0.989973	0.969873	0.98801	1.00499	0.980138	0.986636	0.98252	0.994608	0.984213	1.0171	0.994734	1.01723	0.994785	0.996696	0.991519
udgA2	0.966724	0.996021	0.991853	1.00765	0.996424	1.02252	0.972706	1.00205	1.00843	0.989047	0.987792	1.01515	1.00814	1.01589	0.996407	1.02107	0.996681	1.00154	1.00926	0.99063	0.991682	0.974152	0.993406	0.997324	0.995929	1.01061	0.995746	0.985562	1.00213	1.01632	0.99787	0.994786	0.983574	0.998242	1.00349	1.01631	0.992929	1.00272	0.996225	1.00208
urtA	0.9784	1.00083	1.01023	1.00318	0.993136	1.00279	0.982088	1.00377	1.00246	0.975618	0.978776	0.995368	1.01281	1.00521	1.00844	0.986903	1.00533	0.997877	1.0149	0.991702	1.01129	0.967457	1.0013	0.972649	0.997178	1.01113	1.01316	0.997345	1.00078	0.995475	0.997244	1.00176	1.00357	0.986514	1.00077	1.00186	1.00279	1.00269	0.995057	1.00048
cgp_2920	0.985151	1.02273	1.00629	1.00073	1.0134	1.00658	0.991971	1.01867	0.994752	0.990442	0.987804	0.987914	0.999197	0.994566	0.989968	1.00531	1.00728	1.00242	1.00496	0.997672	1.01155	0.997677	0.982978	0.987533	0.99814	1.00082	1.00275	0.998554	1.0109	1.01046	1.0168	1.0093	0.964348	0.99117	1.00114	1.00242	1.02428	1.00047	1.00735	0.989341
cgp_0625	0.970037	1.01113	0.991244	0.998648	0.999955	1.01095	0.998657	1.00962	0.979469	0.994044	1.03133	1.00139	1.01125	1.01557	0.999683	0.991476	1.02892	1.00158	1.00832	0.986218	1.01007	0.984636	0.988589	1.01249	0.992929	1.00664	0.990952	0.998935	1.0177	1.00729	1.00216	0.997313	0.988523	0.978871	1.00986	1.01655	0.977078	0.996651	0.994019	0.995663
adhC	1.00134	1.01453	1.00011	0.994202	0.994877	0.995905	1.00493	1.01039	0.993068	0.999826	0.99935	1.01473	1.00616	0.989428	0.989606	1.00261	1.01258	1.00309	1.00475	0.96767	0.996838	0.974716	0.992184	0.999493	0.994265	0.996879	1.00171	0.990636	0.991906	0.987472	0.999746	1.00079	0.971502	0.975651	1.00718	1.00249	0.968776	1.0093	1.00524	0.995507
cgp_1028	1.01862	0.994613	0.997018	1.00862	0.998352	0.992075	0.990815	1.00194	1.00475	0.977829	1.01066	1.00431	1.01279	0.980913	1.00487	1.02542	0.999235	0.989865	1.00615	1.01505	0.980238	0.964914	0.973326	0.99803	0.976071	0.992112	0.985805	0.994175	0.998241	1.00431	0.998599	0.999616	1.00429	1.00743	1.01889	1.01691	1.00936	0.986095	0.998333	0.999357
cgp_0678	0.992479	1.00421	0.992428	1.01277	0.995268	0.987355	0.983897	1.00821	0.993123	0.995183	0.999649	0.992729	1.01158	0.988157	1.00372	1.00718	0.995924	0.981254	0.988198	1.01751	0.990177	0.966065	0.991339	0.974611	0.989643	0.990517	0.990556	0.998413	0.998235	1.01052	0.987385	0.998367	0.992241	0.996424	0.994647	1.00856	0.999518	0.99116	0.990245	1.00497
treY	1.01083	0.989915	0.999816	1.00455	0.986323	0.999752	1.01062	1.01161	0.998184	0.978149	0.998302	1.02972	1.01611	0.998113	0.997618	1.00077	1.00876	0.976203	1.00975	1.0043	0.978981	0.982422	0.984317	0.972162	0.997919	1.0005	0.98924	1.00875	1.00371	1.00371	0.999437	1.011	1.00338	0.997002	1.01317	1.00012	1.01098	0.986232	0.979506	0.983357
nadC	1.01517	1.01053	1.0011	0.990991	1.00664	0.993622	1.00518	1.01183	0.97384	0.994576	0.983908	0.989312	1.01939	0.961487	1.00931	0.988675	0.9968	0.992688	0.994026	1.0044	0.966305	0.983905	0.969114	0.987489	0.995102	0.990645	0.982623	1.01296	0.986969	0.988637	0.993503	1.00659	1.00065	1.00005	0.999245	0.997392	1.00554	1.01866	0.989618	0.983553
cgp_2453	1.00138	0.9842	1.01121	0.995439	0.996369	1.00678	1.01756	1.02039	0.995096	0.951413	1.00426	0.991023	1.01069	0.995867	0.997911	0.99848	1.01094	0.998707	1.00571	0.999367	0.979775	0.985234	0.983786	0.989539	0.982686	0.993538	0.997136	1.00987	1.00291	0.987589	1.01218	0.995799	0.992856	0.994422	0.999163	0.976869	1.03296	1.01627	0.985761	1.01096
cgp_0580	1.01204	0.99105	0.993543	0.990304	0.998019	0.996514	1.01227	1.011	0.993513	0.965052	0.985892	0.999554	1.02644	1.0089	0.990456	0.986449	1.00649	0.998153	0.994249	1.01673	0.958598	0.983133	1.00709	0.990448	0.962151	1.01122	1.00516	1.00132	1.00242	0.997607	0.994881	0.99023	1.01177	0.986729	0.995706	0.995159	1.00156	0.987131	0.993735	0.997169
cgp_2937	0.998168	1.00706	1.01337	0.980564	1.0011	1.00274	0.989649	1.01217	0.99282	0.983195	1.00805	1.0374	1.00879	1.0287	0.999698	0.999465	1.01001	0.987284	1.01023	1.02315	0.988655	0.963863	1.01187	0.996919	1.00301	0.99759	0.999296	0.993556	0.992168	0.98552	1.00514	1.00125	1.00828	1.00823	0.984379	0.994505	0.996262	0.996317	1.00021	0.999396
cgp_2468	0.991615	0.986806	1.00359	0.975732	1.00451	1.00518	1.00605	1.02487	1.00548	0.979428	0.989842	1.00366	0.981954	1.02678	1.00239	1.00355	0.990313	0.968233	1.00748	1.00384	0.985172	0.9552	1.0155	0.99708	0.99412	0.992823	0.997719	0.997463	1.0073	0.989339	1.00394	1.00463	1.0038	0.994974	0.995136	0.993075	1.00104	0.991268	0.985598	0.985637
hscA	0.980598	0.994152	1.00228	0.952295	1.01042	1.01421	1.01244	1.00606	1.01353	0.983917	1.00431	1.00793	0.999402	1.00588	1.00523	1.00274	0.991849	0.995768	0.993132	1.01374	1.01302	1.00226	0.989992	0.981991	1.00363	0.990983	1.00438	1.01504	0.988175	0.991704	1.01163	1.0096	0.990227	0.993446	0.986749	0.988991	0.998175	0.997212	0.996849	1.00106
cytP	1.00537	0.996381	0.996903	1.02003	1.01281	1.0043	1.01193	1.01047	1.01414	1.00706	1.00649	0.995607	1.02619	1.02187	1.00951	0.992595	1.00788	0.955766	0.975389	0.999385	1.00246	1.00683	1.01028	1.01258	0.996276	0.993649	0.986612	1.00256	0.976712	1.00561	1.01149	1.00905	0.992671	0.993554	0.991809	0.984658	1.02466	0.995081	1.00232	0.988711
cgp_2758	1.00725	1.00689	0.983254	1.01198	1.00195	1.00607	0.996189	0.986477	0.991193	0.974949	0.999612	0.982704	1.00401	1.01429	0.996271	1.0035	0.983661	1.00266	1.00933	0.999808	1.00765	0.995331	1.02288	1.00778	1.01379	1.00527	0.987269	0.989559	0.998673	0.971986	0.998169	0.992077	1.00184	0.996145	0.998171	1.01396	1.00191	0.98639	1.00899	1.02616
radA	1.01426	0.992903	1.00371	1.01777	0.981208	0.997032	1.01157	1.00131	0.984836	0.958633	0.990308	0.996859	0.986613	1.0037	0.988308	1.00056	0.996004	1.00105	1.00657	0.988446	0.985413	0.991462	1.01351	0.982178	0.997456	0.996201	0.991168	0.999289	0.992783	0.994442	0.990144	1.01718	1.0026	0.99817	0.996419	0.995818	1.01032	1.00276	1.00765	1.00775
cgp_2838	1.00947	1.01612	0.99966	1.00158	0.994483	0.998536	1.01079	0.998853	0.975597	0.977764	1.00615	1.00303	0.991201	0.990277	0.994078	0.997638	1.00481	1.00603	1.01411	0.980015	0.995777	0.993686	1.00326	0.997595	1.00848	0.981504	0.989823	0.974378	1.0225	0.986161	1.01081	1.00945	1.00701	1.02777	0.992114	1.00366	1.0085	0.969342	1.00353	1.01246
pcaH	1.01269	1.0103	1.00368	1.0033	0.993953	0.987987	1.00149	0.99289	0.97721	0.950435	0.984276	0.988099	0.974227	1.01945	1.01117	0.983966	0.992042	1.01157	1.00989	0.99061	0.977211	1.00734	0.989185	0.975275	0.986429	0.975479	0.983486	0.978128	0.978935	1.00636	0.992109	0.989735	0.984563	1.00215	0.997223	1.01253	0.99431	0.982254	0.992335	1.00451
cgp_2425	1.00206	0.979334	1.00826	0.988652	1.01246	1.00285	1.01555	0.998216	0.999304	0.967286	0.998109	1.001	0.98289	0.97801	0.981694	1.02073	0.988084	0.994702	0.99797	0.997275	1.00207	1.00643	1.01122	0.983642	0.977481	0.99389	0.991002	1.00011	0.984426	1.00493	0.987161	0.982362	1.00044	0.989738	0.991488	1.0027	0.991303	0.985857	0.993997	0.991158
cgp_2674	0.988681	0.983668	0.983778	0.98123	0.997471	0.988913	1.00613	0.988097	0.975324	0.983833	0.988367	0.982815	0.995689	1.00105	0.982291	0.99691	0.987784	0.996975	0.992873	0.998063	1.02417	1.02178	1.01034	0.99999	0.981636	0.978004	0.987026	0.987795	0.994685	0.970044	1.00675	0.987218	0.981309	0.993632	0.996261	0.984454	0.974805	0.967425	0.993499	0.988013
cgp_2701	0.988537	0.97309	0.981615	1.01951	1.0171	1.00394	1.01634	1.00776	0.991673	0.990996	1.00323	0.993243	0.982905	0.997593	0.977602	0.980591	0.990177	0.996699	0.989106	0.999227	1.00784	1.00439	1.00865	0.987355	1.02623	0.975463	0.984815	0.987598	0.985105	0.980923	0.995378	0.976717	0.979529	0.997228	1.00369	1.02532	0.986583	0.989361	0.984904	0.981529
ddh	1.00023	1.01092	0.97421	1.00114	0.990256	0.988958	1.00683	1.0084	1.01123	0.990253	0.997382	1.00829	0.986743	1.01323	0.993003	0.973244	0.98674	0.990281	0.999109	1.02431	0.988183	0.999532	1.0159	0.987527	1.01154	0.991711	0.989565	0.998731	0.996555	0.998651	1.00251	1.00579	0.978173	0.996897	1.00871	0.997406	1.03028	0.984842	0.994456	1.00516
benC	1.00498	1.00281	0.99263	0.994894	1.01811	0.986798	1.00773	0.99912	0.982509	1.00114	0.989834	0.97292	1.00016	1.03179	1.00407	0.992634	0.993078	0.984926	0.989205	1.00228	0.986322	1.00236	0.995944	0.980308	1.00346	0.983031	0.986752	1.00937	0.991203	0.996621	1.00492	1.00472	0.986951	0.99437	0.998101	1.01347	1.0296	1.00143	1.00052	1.00298
catB	1.02214	0.990836	0.965667	1.00572	1.00109	0.982336	0.984082	0.98254	0.991737	0.983998	1.00546	0.985568	0.981424	1.00623	0.999269	1.00391	0.984084	1.0039	0.991848	1.01071	0.976112	0.987485	0.98342	0.974697	0.994773	0.967325	0.984499	1.00958	0.994776	0.986067	0.999725	1.00268	0.975322	0.978703	1.01739	1.0008	1.01017	0.978785	0.995479	1.01174
cgp_0890	0.976846	1.00264	0.990727	0.99627	0.988488	1.00322	0.984462	0.970941	0.968658	1.00446	1.01216	0.996811	0.994878	0.988987	1.00437	0.980707	0.996425	0.977524	0.975746	0.993899	0.974022	0.982949	1.0058	0.99651	0.989495	0.979952	1.01183	1.0087	1.00409	0.993818	0.998223	1.00501	0.985136	0.988248	1.00365	1.00756	1.00735	0.983797	1.00134	1.00848
cgp_2661	1.03494	0.962223	1.00411	0.991024	0.996811	0.985701	1.00636	1.01781	0.98621	0.93347	1.01841	0.997111	1.01579	0.974923	1.01386	1.01059	0.984768	1.01322	0.996354	1.00726	0.986741	0.978558	1.02344	0.98954	0.986721	1.00669	0.990419	0.987243	0.974874	1.00503	1.00943	1.00441	0.986788	1.01003	0.989234	1.01607	0.96176	0.980678	0.995834	0.983819
pdxK	1.02911	0.991769	0.999124	0.994722	0.992687	0.96613	0.978189	1.00335	0.997991	0.985553	0.990554	1.02042	1.02407	1.0239	0.998815	0.982583	1.00961	1.00127	0.991215	1.01359	0.9915	0.9699	0.981261	0.987212	1.01065	0.993231	0.991456	0.997242	0.945683	0.99256	1.01753	1.02294	0.986842	0.987781	0.956922	1.02358	0.961046	0.978961	0.980859	0.988651
cgp_1282	0.995898	1.02718	0.986323	1.00593	1.01459	0.988855	0.970757	1.0221	1.02221	0.944074	1.00767	0.990994	1.03307	1.00538	1.02656	0.994879	0.97095	0.987432	0.991628	1.01881	0.988411	0.983211	0.999268	0.978164	0.985131	1.01901	0.988314	0.970623	1.009	0.992231	0.999675	1.0232	1.00212	0.97309	0.97944	1.03425	0.99012	0.985441	0.996288	0.966435
psp4	1.00979	1.00976	1.00645	1.01213	1.01588	1.01858	1.00742	0.993484	1.00085	0.970305	0.964809	0.993569	1.03444	0.997838	0.992044	1.00215	1.0298	1.00173	1.02183	0.977486	1.00948	1.00766	1.00632	0.983515	0.997592	0.999076	0.988915	1.00338	1.02558	0.995513	1.00612	1.01437	0.993601	1.011	1.02581	0.996131	1.00844	1.00788	0.991821	0.996493
cgp_3170	1.0032	1.00988	1.01268	0.990117	1.01033	1.01561	1.01693	1.01214	0.994352	0.988969	1.00113	0.987929	1.02435	1.00523	1.01524	1.00911	1.00046	1.0149	1.01602	0.96451	0.992837	0.981166	0.988956	0.965593	0.999139	1.00903	0.99958	1.01063	1.00262	1.00675	1.00628	0.98279	0.990111	1.01507	1.01295	0.989207	1.02109	1.02122	1.00074	0.994453
mutM1	1.00822	1.01618	1.01363	1.00146	1.03341	1.028	1.04542	1.00767	0.996352	1.00488	0.987421	0.995951	0.995224	1.02592	1.00528	1.03008	1.03178	0.993993	1.02299	0.999085	0.992916	0.996325	0.993637	0.966677	0.97615	0.985078	1.0021	1.01153	1.00509	1.02584	0.988373	1.0122	1.00065	0.998906	1.02148	1.0184	0.998659	1.00772	1.01806	0.995466
cgp_2664	0.971503	0.991541	1.00956	0.999064	1.02477	1.01657	1.04007	1.01059	1.01931	0.958163	1.00161	0.999723	1.00688	1.00699	1.01284	1.00941	1.04649	0.995997	1.01467	1.01319	1.0071	0.997548	1.01244	0.9965	1.00463	1.04041	1.00672	0.989462	0.999862	1.00924	1.01389	1.02154	0.984123	0.995938	1.00892	1.00653	1.03622	1.00055	0.988502	0.992458
cgp_1503	0.984767	0.993499	1.00499	1.02455	1.01634	0.99952	1.02559	0.998113	1.00122	0.97136	0.961457	0.985855	1.00002	1.01361	1.01981	1.01775	1.01156	0.996311	1.00742	0.996253	0.989634	0.991034	0.998572	0.981158	0.987716	1.01143	1.00032	1.02776	1.01585	0.992893	1.02536	1.01395	0.979879	1.01353	0.99782	1.01961	1.01568	0.982807	0.972425	0.980867
cgp_0450	0.982947	1.00794	0.988673	0.995113	0.992023	0.995404	0.993088	1.0192	1.02055	1.00634	0.983719	1.02445	1.00259	1.01916	0.977433	1.01741	1.01703	0.986836	1.01903	0.990982	1.0036	0.989572	1.00984	0.996465	0.980544	1.00232	0.999471	0.989754	0.989243	0.993307	0.994279	1.00408	0.996752	1.00736	1.00831	1.00119	1.02259	0.99377	1.01344	1.0073
ald	0.991308	0.997252	1.00404	0.985241	1.01287	1.0055	0.992642	1.00637	1.02203	1.00643	0.981313	1.01534	0.989342	1.01728	0.997856	1.01158	1.00018	0.989047	0.998539	0.981818	1.0029	1.0002	1.02704	1.00152	0.984596	0.98449	0.978735	0.989433	0.994911	0.999318	1.00287	1.00041	0.983644	0.977661	1.0083	1.00522	0.985283	0.979382	1.01423	1.01164
pcaJ	0.977492	1.0123	1.00707	0.990676	1.019	1.01401	0.994678	1.00947	1.01558	0.985888	0.968331	1.01133	1.01981	1.02088	1.00179	1.00642	1.01935	1.03205	1.00947	1.00635	1.00958	0.989837	1.00386	0.990263	0.977632	0.991615	0.994135	0.957491	1.01397	0.995189	0.979886	1.01159	0.991979	0.996949	1.01896	1.01345	1.00028	0.985118	0.97854	0.996098
cgp_2711	0.990337	0.99601	1.00196	0.989253	1.02073	1.01233	1.02166	1.02632	1.00878	1.0236	0.978774	1.03383	1.0056	1.03211	1.01128	1.00996	1.0049	1.00094	0.984703	1.01505	1.02838	0.979355	0.983233	0.983512	0.972261	0.985888	0.979762	0.983251	1.00089	1.01495	1.01141	1.00299	0.963017	0.991832	1.00209	1.0059	1.02112	1.00677	0.994939	1.00178
cgp_1441	1.02195	0.989581	1.00944	1.00015	1.005	1.00404	1.02213	1.0125	0.99572	0.988779	0.966782	0.999221	0.981584	1.00117	1.01841	1.00687	1.0057	0.991997	0.994709	1.00044	0.982431	0.97777	0.981346	0.996386	1.02829	0.971229	1.00909	0.987968	0.994297	1.00893	0.989161	0.988614	0.987962	0.984475	1.02027	1.00836	1.05345	0.969136	0.989932	0.984825
ssuA	0.986114	0.995356	0.989215	0.991309	0.984585	1.02043	1.01769	0.997495	0.991848	0.98163	0.964747	0.974036	0.998111	0.997191	0.998742	1.02122	0.970079	0.996124	0.984782	0.97657	0.998338	0.978921	0.997428	0.969896	1.01821	0.986465	1.02971	1.00943	0.988253	0.997856	0.991871	0.991225	1.00014	1.0161	1.01113	1.00718	1.01826	0.98293	1.00564	0.984053
cgp_1305	1.02474	0.988898	0.993947	0.996653	1.01979	0.995596	1.00119	1.01811	1.00255	0.970691	0.993416	1.00331	1.00058	1.00162	0.991056	1.01799	0.979069	1.00365	1.00433	1.0048	0.992446	1.00582	1.0117	0.955695	1.02875	0.988977	1.00532	0.999454	0.976824	0.982513	1.01667	1.00442	0.992819	0.98724	1.00361	1.02548	1.01204	0.97868	1.00974	0.996316
cgp_0742	1.03371	1.02229	0.999268	1.01441	0.988887	1.00609	1.00273	1.01057	0.992208	0.988296	0.959112	0.987255	1.00388	0.999227	1.00802	1.00589	1.01275	1.01431	0.976539	1.03134	0.987461	0.993266	1.00759	0.997966	1.00825	0.991383	1.0074	0.973004	1.00838	1.02378	0.984242	1.01548	1.03284	0.993203	1.01099	1.02895	1.00781	0.996522	1.0095	0.977569
papA	1.00658	0.981409	1.00184	1.00909	0.985485	1.00673	0.989798	1.01794	0.993233	0.959266	0.932163	1.0091	1.00014	0.976517	0.992968	1.01191	1.01476	0.998134	1.00001	1.02609	1.00738	0.980351	1.01307	0.980508	1.03783	0.997425	1.0021	1.00119	1.0073	1.01291	0.990406	1.00315	1.01546	1.00379	0.996278	1.03201	1.00833	0.999427	1.00717	1.0172
cgp_0726	1.02708	0.993092	1.01665	1.00125	1.00105	1.0189	1.01894	0.995293	0.987049	0.994216	0.973264	1.00941	0.965536	1.00815	0.994147	0.97143	1.01378	1.00498	0.963266	1.02702	1.01705	1.01112	1.02179	1.01455	1.01058	0.985186	1.01025	0.981271	0.96755	1.00573	0.99188	0.988184	1.00656	0.996653	0.98717	1.01318	1.00278	0.993895	0.991771	1.00174
pgp2	1.00274	1.00195	1.01654	1.02846	0.986857	1.018	1.01436	1.02418	0.996998	0.950222	0.975627	1.00812	0.9809	1.00379	0.987683	0.978992	1.03107	0.999141	0.997247	0.977401	0.997053	1.01912	0.995039	1.00901	1.00341	0.988691	0.999591	1.0044	0.974979	1.02635	1.0088	1.01023	0.989119	1.00806	1.03455	1.00198	0.980043	0.973144	0.981044	0.995983
cgp_0078	1.00078	1.01199	0.992582	1.00658	1.01496	1.0097	0.985408	1.00631	1.02098	0.984708	1.02179	0.972432	1.00363	0.976927	1.0156	1.00883	1.02171	1.01732	1.01309	0.954895	1.00824	0.977571	1.03199	1.01941	0.980551	1.00095	0.997559	0.995113	0.996933	1.00191	1.01039	0.996924	0.998913	0.996011	1.00476	1.00828	1.01668	1.0068	1.00189	1.01074
cgp_2968	0.999437	0.99211	0.999603	0.994408	0.987621	1.00926	0.988232	0.992232	0.994345	0.976474	0.991296	0.980851	1.00394	0.975957	1.00135	1.00817	1.01885	1.02012	0.991873	0.982039	1.01999	0.984905	1.01472	1.01136	1.00087	0.987775	0.995019	0.99465	1.0215	0.991535	0.996872	1.02287	0.994826	0.982487	1.00262	1.00839	1.01323	0.99622	0.994428	1.0137
cgp_3067	0.99344	1.00175	1.00423	0.979599	0.993253	1.01339	0.984544	0.982679	0.998607	0.982461	1.00637	0.970641	1.0052	1.00864	0.991199	1.0185	1.02618	1.0041	1.01384	0.964512	1.00726	0.999947	1.00312	1.01879	0.981872	1.02049	0.996996	1.00512	1.00613	0.988613	0.978467	0.979338	0.991845	0.988833	1.00776	1.01947	1.01087	1.00278	1.0137	1.00727
cgp_2585	1.00767	1.00832	0.994361	0.974094	0.990836	1.00022	0.993248	0.996883	0.988945	0.975915	0.993718	0.983825	1.00444	1.00551	1.01292	0.989731	1.00307	1.03789	1.02235	0.986078	1.00328	0.982932	1.00379	1.01189	0.996474	0.983797	0.995892	0.996162	0.998952	1.02132	0.995615	1.00941	0.989414	0.971832	1.02779	1.00967	1.05201	0.998461	1.01115	1.00053
glbO	1.03308	0.972866	0.996996	0.99558	1.00456	0.985622	0.991618	0.99974	1.01348	0.987515	0.978385	0.960746	1.0237	1.03125	1.00964	1.00887	0.982389	0.979129	1.00857	1.00022	0.999625	0.979898	1.02184	1.02321	0.993115	0.98737	1.00599	0.99774	1.03521	1.00882	1.00289	0.985925	1.00908	0.995943	1.0306	1.02129	0.993053	0.991061	1.0093	1.02369
cgp_0034	0.988919	1.00426	1.00821	0.993636	1.01257	1.01412	1.00146	1.02689	0.978857	0.99227	0.954048	0.973056	0.998179	0.996191	0.978434	1.00778	1.02916	1.02558	0.998703	0.999279	1.00317	0.988588	0.985282	1.00131	0.968711	0.999235	0.983617	0.994192	1.00533	1.02116	1.01642	0.998973	1.01076	1.02377	1.00258	1.00014	0.973543	1.01287	0.99247	1.01339
ureB	0.98521	1.03206	1.00694	1.00465	1.00069	0.991224	1.00194	1.00037	0.99226	0.969444	0.960646	0.983213	0.977059	0.962854	0.970152	1.00153	1.02058	1.00059	0.987653	1.00812	1.01566	0.987311	1.00389	1.02281	0.969873	1.01128	0.998452	0.987401	1.00216	1.01179	1.01356	0.996291	0.972863	0.989688	1.02238	1.00527	0.973919	1.00515	1.00046	1.02596
cgp_3348	1.02005	1.00474	0.994837	1.00904	1.02786	0.98523	1.00042	1.01911	0.996442	0.973815	0.958845	0.978786	0.959032	1.02358	1.0066	0.998504	1.00755	1.00379	1.01242	0.995262	1.02271	1.0226	0.990192	0.980813	0.982559	1.00234	1.01045	1.03089	1.00949	1.00814	1.0187	1.02731	0.998108	1.01815	1.038	1.00514	0.987186	1.02818	1.01114	1.01019
cgp_0908	1.05593	1.02191	1.00334	1.00658	1.01054	1.04276	1.02021	1.01384	1.03011	0.958179	0.999953	0.993369	1.04072	0.988193	1.02281	1.00717	1.01606	0.979323	1.01101	0.991635	1.0638	0.984065	1.03408	1.01145	0.998557	0.989568	1.02802	1.00526	0.968604	1.0161	0.990906	1.01144	0.97869	0.988976	0.986578	1.03705	0.946242	1.00356	0.992107	0.99996
whiB3	1.01389	0.980183	0.980358	1.00666	0.968377	0.989227	1.02443	0.989309	0.987254	0.973745	0.991433	1.02042	1.00747	0.976939	1.02595	0.976223	0.971081	1.03881	1.03351	1.04259	1.01952	0.961168	1.03485	1.00429	0.973434	0.96518	1.01438	0.986615	0.990543	1.01754	0.980138	1.00843	1.00248	1.00003	0.985711	1.05183	0.957331	0.987814	0.992987	0.986997
cgp_2727	1.00479	1.00023	0.998412	1.01365	0.999891	1.02285	1.02751	1.03098	0.98904	0.948561	1.00454	0.979823	0.989302	1.00554	0.993115	1.00301	1.02666	0.996205	0.987139	1.00575	0.982174	0.985748	1.02465	1.00631	1.03781	1.0055	1.00318	1.00421	1.0229	1.01147	0.995814	1.00559	1.00612	1.00457	0.956984	1.0115	1.00624	1.00507	0.994808	1.00778
cgp_0477	1.00737	0.975334	1.01993	0.991757	1.00489	1.01048	1.0265	1.01481	0.999875	0.934286	0.994424	0.981884	0.981113	1.01129	1.00689	1.02444	1.02148	0.974727	1.02457	1.00453	0.996355	0.993841	0.988342	1.01498	0.999375	1.00492	1.00245	1.00427	1.03108	0.999658	1.00663	0.999142	1.00223	1.00078	0.995561	1.00228	0.981291	0.976843	0.986709	1.02388
cgp_1288	0.997848	1.00478	1.0131	0.965088	1.00562	0.997502	0.992889	1.02925	1.0186	0.947603	0.958169	0.975245	1.0031	1.02022	0.992598	0.991508	1.02683	1.00909	1.02876	0.996252	1.00668	0.98671	0.956106	1.0176	1.00865	1.0014	1.00966	0.984714	1.01326	1.00986	1.01401	1.00602	0.997957	0.990308	0.975827	1.00185	0.979502	0.982566	0.98687	0.992526
cgp_3337	0.968237	0.968544	1.01713	1.00936	0.991938	1.05322	0.992247	1.03563	1.00396	0.967207	0.990044	0.952953	0.957107	0.986413	0.985423	0.99851	1.03011	1.03324	1.02753	0.98686	1.02889	1.00707	1.004	0.991339	1.02934	1.03764	1.01328	0.992863	0.997969	1.0062	1.01198	1.00985	1.02204	1.00146	0.979774	0.997212	0.98612	0.99973	0.985785	1.00081
cgp_1232	0.984987	0.985248	0.990075	0.975639	0.995806	1.0207	1.00937	1.02191	1.01611	0.971385	0.951767	0.966162	0.964947	0.982051	1.00758	1.00663	1.01137	1.01242	0.994579	0.986756	1.04215	1.00434	1.02371	1.02342	1.02824	1.02263	1.01224	1.01318	1.0087	1.00526	0.997468	0.995016	0.981454	0.99601	0.976358	1.00925	0.987113	0.977819	0.981376	0.984882
cgp_2665	0.968433	0.995618	1.01066	1.00951	0.992874	1.02037	1.00673	1.01349	1.0051	1.00114	1.01889	0.984426	0.987594	1.01	0.976261	0.996335	1.01182	1.01981	1.01852	0.951087	0.997166	0.99808	1.01212	1.00548	0.989745	0.986628	0.99278	1.02362	0.978318	0.99524	0.995253	1.00638	1.011	0.96563	1.00611	1.00443	1.00883	0.97902	0.997035	1.00165
cgp_0150	0.940246	0.984486	1.01545	1.01699	0.995042	1.0165	1.00813	1.00229	1.00624	0.962724	0.976892	0.994671	0.979021	1.00568	0.981432	0.993774	1.02291	1.01872	0.992832	0.980792	0.992351	0.993832	0.989509	1.00861	0.984896	0.996006	0.969731	1.02747	0.999226	1.01676	0.98682	0.992123	1.01329	0.983849	0.97823	1.00898	0.996974	0.986808	0.997061	0.993828
cgp_2628	0.97996	0.989338	1.01734	1.00817	0.974744	1.00164	0.980058	0.983484	1.02831	0.976364	0.983775	1.01452	0.999039	1.01612	0.988257	1.00592	1.01488	1.0203	1.02964	0.959043	0.990223	1.00066	1.02603	0.991544	1.01705	0.999468	0.981473	1.00073	0.991614	0.978461	0.993527	0.986741	1.01245	0.990253	1.01108	1.00249	0.988173	0.975988	1.00659	0.986216
cgp_3402	1.02427	0.963721	0.996819	0.986248	1.00107	1.00313	1.01904	1.02871	1.03862	0.975174	1.02786	0.996335	0.967382	1.01459	0.998206	0.993304	0.992398	1.02329	1.03179	0.97876	0.971348	0.986609	0.992947	1.01198	1.01114	0.97732	0.993662	1.04628	1.00735	1.00258	1.02712	0.992101	1.00667	0.970212	0.985118	0.988939	1.01929	1.01202	1.01654	1.01646
cgp_3102	1.01261	0.986732	1.00204	1.00627	0.977188	1.03729	1.01519	1.01136	1.01053	0.909863	0.983083	0.992604	1.01211	0.988877	0.982998	1.02085	1.02031	1.02428	1.00985	0.984247	0.991896	0.983995	1.00299	0.952805	1.03365	0.996016	0.97621	1.01584	0.988032	0.997526	0.986329	0.982934	0.998463	1.00328	1.01062	0.990362	1.0405	1.00074	1.00964	1.01221
cgp_1318	0.987843	1.01527	1.03087	1.02016	0.997516	1.02639	1.02419	1.04134	1.00532	0.976362	0.994862	1.00715	1.02764	0.943101	1.01502	1.01482	1.01204	1.0051	1.01895	1.01423	1.0002	0.988107	0.978428	0.986981	1.00113	1.00291	1.01944	1.00875	1.0135	1.01409	1.02481	1.02068	1.02153	1.00802	0.992385	1.02135	1.03365	1.01243	0.999149	0.998368
rlmA	0.989486	1.00245	0.991934	0.986081	0.990456	1.02002	1.00298	1.02761	0.991719	0.973184	0.989588	1.00101	1.03715	0.964756	1.01732	1.02185	0.990917	1.00849	1.02234	1.00603	1.02007	1.00894	0.967272	0.993218	1.01114	0.990274	1.00037	1.01249	0.99562	1.03093	1.01491	1.02092	1.00694	1.01801	1.02031	1.04043	1.04398	0.989148	0.981575	0.995361
cgp_1073	0.967142	1.0024	1.00605	1.00642	0.990485	1.02525	1.01596	1.02813	1.0077	0.988087	0.975106	1.0223	1.03406	0.972424	1.00079	1.02687	0.990066	0.989589	1.00357	1.01373	1.0062	0.99388	0.992706	0.962638	1.01151	1.00795	0.993924	1.01809	0.971736	1.01155	1.02164	1.01435	0.991207	0.999478	1.02257	0.973636	1.01318	0.992801	0.991608	1.00066
cgp_1035	1.00939	1.02587	1.00977	1.00136	1.01372	1.0314	1.02441	0.9959	1.0267	0.977189	1.001	0.974162	1.01535	0.990329	1.00661	1.00966	1.00276	1.00253	1.01845	0.992451	1.00846	1.03303	0.992277	1.00155	1.00714	0.963249	0.999521	1.02013	1.01021	1.00328	1.03366	1.03142	1.01872	0.978213	1.01837	0.996371	1.00535	0.985077	0.993636	1.00827
cgp_2450	1.01188	0.981017	1.0011	0.983763	1.00983	1.02136	0.998782	1.01157	0.997457	0.970347	0.981364	1.01912	0.986403	1.00036	1.00428	1.00873	1.00686	1.00923	1.00011	0.987777	0.996515	0.997625	0.980535	0.990005	1.00599	0.942755	1.00054	1.0238	1.01338	1.01316	1.00556	1.02374	1.00602	1.0129	1.01423	1.0175	1.01933	1.00533	0.975282	1.00698
cgp_1204	0.987584	0.991822	1.02024	0.998673	0.998211	1.01202	0.999352	0.995206	1.00495	0.960901	1.00054	0.994781	1.01204	0.988088	1.04265	0.977581	1.00895	0.987098	1.00443	1.02372	1.02666	0.985208	1.0026	1.00543	1.02589	1.01224	1.00764	1.00214	0.978384	1.01665	1.02235	1.00339	1.01762	1.01401	1.01679	1.0273	1.02633	0.961904	0.981765	0.979995
cgp_2136	0.978624	0.997033	0.997536	1.01917	1.00717	1.01463	1.00748	0.996899	1.00542	0.946856	0.97032	1.00627	1.02079	0.998253	1.01461	1.00757	0.980238	0.981734	1.00083	1.01091	1.03576	1.02147	0.994561	0.998005	1.00813	1.00688	1.01487	1.02384	1.01167	0.987478	0.988673	1.00171	1.01967	1.01152	1.00658	1.00907	1.00653	0.99688	0.967559	0.973014
cgp_2186	0.996499	1.02092	1.0238	1.01005	0.969176	1.02738	0.999591	0.994073	0.997364	0.924746	0.979471	0.994976	1.01528	0.989774	0.997201	1.00928	1.00786	0.960197	1.01326	1.00208	1.00343	0.987965	0.951612	1.01044	0.987967	1.00584	0.999839	1.02887	0.999608	1.01618	1.00749	1.01576	1.02804	1.02431	1.02099	1.00853	1.01471	0.999503	0.996979	0.978399
urtD	1.01886	0.967316	1.03523	0.988046	0.993886	1.01289	1.00349	0.993825	0.98887	0.955615	1.03213	1.00862	1.06939	1.03227	1.01193	1.0023	1.02768	0.987353	1.00173	1.03605	0.995202	0.961784	1.01135	0.979815	1.00685	0.976616	0.967703	1.03298	1.00891	0.994564	1.00214	1.01263	0.994638	1.01284	0.989387	1.02487	0.975244	0.994229	0.995823	1.00279
cgp_0907	0.991399	0.988263	1.02614	0.985156	0.999379	1.00883	1.00216	1.01305	1.00156	0.917619	0.997157	0.970975	1.02202	1.04257	1.03219	0.980518	1.0368	1.02861	1.02609	0.995688	1.00389	0.998721	0.980958	0.953225	1.00654	1.00606	0.984546	1.0342	1.0202	1.01876	0.965634	1.04013	0.982542	0.9769	0.982656	0.99912	0.950018	0.97133	0.990739	1.00464
cgp_0339	1.01944	0.956966	1.01866	0.995079	0.984159	0.982321	0.988028	0.996357	0.988399	0.941839	1.00327	1.01264	1.02007	1.01389	1.01215	0.972081	0.963297	1.0057	0.998862	0.975709	1.00973	0.982943	0.939201	0.970726	0.967432	1.02398	0.976509	0.985772	0.990451	0.967624	0.994631	1.0307	0.987755	0.98263	1.02469	0.975263	0.926042	0.996238	1.01258	0.996844
cgp_3195	1.00263	1.00989	1.01275	1.00413	1.01411	1.01694	1.01757	1.01888	1.0183	1.0039	1.00252	1.0276	1.00935	0.994512	1.00104	1.01363	1.0194	1.01735	1.00756	1.01116	1.01714	1.00049	1.0045	1.02342	1.01135	0.996816	0.999778	1.00319	1.00813	1.00146	1.01609	1.00749	1.00421	0.989961	1.01347	1.0109	1.01323	1.01192	1.01207	1.00137
cgp_0507	1.00456	0.993036	1.00538	1.01633	1.01288	1.01282	1.00019	1.02232	1.02	0.998928	0.997056	1.03198	1.00986	0.986092	1.01053	1.01849	1.01627	1.00878	1.00672	1.01771	1.01097	0.998801	1.01413	1.00953	1.01423	0.984468	1.00781	1.00256	0.994291	1.00397	1.00439	0.997583	1.00036	1.00305	1.01466	1.01673	0.986165	1.0011	1.01569	1.00959
cgp_3334	0.999286	0.999342	1.00978	1.00642	1.03422	1.01629	0.989106	1.01001	1.02024	1.00435	1.00534	1.01755	1.02022	0.987793	1.01264	1.0116	1.005	1.01735	1.0265	1.02547	1.0014	0.989381	1.02464	1.01866	0.99628	1.01435	1.00121	1.00936	1.01261	0.995139	1.01247	1.00791	0.995564	1.00015	1.0206	1.02225	0.997092	1.01854	1.02675	0.999473
cgp_0508	0.976543	1.01026	1.01292	1.00816	1.01101	1.01169	0.996036	1.0164	1.00916	0.998178	0.991791	1.0035	1.01258	0.981119	1.0103	1.03251	1.02713	1.01686	1.02132	1.01999	1.00868	0.977017	1.01351	1.02445	1.00979	0.993699	1.00526	1.01539	1.00302	0.999322	1.00427	1.00632	0.99522	1.00112	0.998946	1.00769	1.01194	1.00428	1.00444	1.01873
panC	0.988864	1.00878	1.01926	1.00085	1.00848	1.01682	1.00275	1.00877	0.999989	0.994351	1.01107	1.00907	1.01415	0.974114	0.999231	1.02452	1.02158	1.0071	1.01179	1.00147	1.0031	0.976079	1.02334	1.01743	1.00013	1.01277	0.98808	1.00404	1.01908	1.00775	0.995711	0.991491	1.0209	1.02252	1.00993	1.00043	0.998825	0.994014	1.00856	1.00567
iolD	0.999092	1.02058	1.00967	1.00056	1.00747	1.01114	1.00067	1.0132	1.02168	0.99985	1.00864	1.00228	0.999089	0.993855	1.00897	0.998217	1.01508	1.01502	1.02006	0.996874	0.999261	0.988781	1.01674	1.01832	1.00547	0.995937	1.00176	1.00734	1.00032	1.00208	0.999806	0.997596	1.00127	0.999564	1.01467	1.01443	1.01905	1.01505	1.01181	1.01117
pqo	0.997557	1.01534	0.998033	0.996411	1.00508	1.02104	1.00315	1.01831	1.00756	0.990684	1.02929	1.01616	1.0197	0.987586	1.00343	1.00639	1.00914	1.00508	1.01045	1.00438	1.00876	1.00259	1.01791	1.00849	0.987277	0.994539	1.01314	0.996106	0.999817	1.00177	0.996659	1.00673	0.990315	0.998768	1.01883	0.999618	1.01293	1.01359	1.00452	1.00606
cgp_0504	0.995329	1.0063	1.00946	1.01127	1.00601	1.01966	0.983034	1.017	0.993218	0.990433	1.00204	1.01798	1.00362	0.986064	0.993946	1.01162	1.00518	0.996417	0.997408	1.00871	0.991378	0.986729	1.00703	1.02875	1.00405	0.985212	1.00066	0.98584	1.01611	0.993661	1.00863	0.982069	0.999172	1.00562	1.01478	1.00848	1.0173	1.00305	1.00118	1.00531
cgp_0642	0.999526	1.01047	1.00789	1.02128	0.997269	1.01043	1.0176	1.01244	0.988245	0.986699	1.00067	1.01426	1.01213	0.980085	1.00135	0.994614	0.997312	1.0171	1.00597	0.999308	1.00858	0.990837	1.02196	1.00709	1.01545	1.00864	0.988995	1.00846	1.00114	1.01519	0.987667	0.990027	1.00793	1.00828	1.01618	1.00514	1.00927	1.00558	1.0138	1.00388
kup	0.995089	1.01423	0.999446	0.995269	0.998547	0.998643	1.02034	1.0034	0.99783	0.98596	0.991811	1.01665	1.00662	0.975627	0.997103	0.993152	0.995074	1.00663	1.01471	1.00963	0.997797	0.986909	0.999503	1.01591	1.00902	0.999763	0.992124	0.991191	0.994409	1.00004	0.998615	1.00867	0.995889	0.999025	0.997476	1.01157	1.00248	1.00219	1.00854	0.98547
cgp_0668	0.997227	0.99194	1.00843	1.005	0.999094	1.01534	1.00618	1.02555	0.989503	0.970987	0.98489	1.0174	1.01411	0.996391	0.997955	1.01764	1.01142	1.00986	1.01862	1.00455	1.00492	1.00243	1.0222	1.01753	0.995018	1.00894	0.992591	0.98907	0.999788	0.999897	1.00109	1.01794	0.998014	1.01087	0.998231	1.02029	1.00821	0.99491	1.00473	1.00963
cma	0.99091	0.987717	1.00735	1.0061	1.00866	1.02449	1.01893	1.02299	1.00047	0.986291	0.986487	1.01238	1.00194	0.989038	0.989768	1.00221	1.02614	1.0014	1.01947	1.00984	0.990093	0.995066	1.00952	1.01319	1.00213	0.99414	0.995062	1.00559	0.999529	1.0153	1.00436	1.02461	0.997264	1.00227	1.00754	1.00678	0.995396	0.989964	0.991003	1.00744
[truncated: 1,294 more rows]
